# Supplementary material for: Direct contact between iPSC-derived macrophages and hepatocytes drives reciprocal acquisition of Kupffer cell identity and hepatocyte maturation
Source: bioRxiv preprint, doi:10.1101/2025.08.26.672295, version 2 (2026-04-01)
Supplement: Supp Table 2 [file 672295_file05.xlsx]

## Sheet: Summary
Comparison

## Sheet: EdgeR | Group | D3 | D0
geneSymbol

## Sheet: DESeq2 | Group | D3 | D0
geneSymbol

## Sheet: EdgeR | Group | D7Alo | D0
geneSymbol

## Sheet: DESeq2 | Group | D7Alo | D0
geneSymbol

## Sheet: EdgeR | Group | D7Cdn | D0
geneSymbol

## Sheet: DESeq2 | Group | D7Cdn | D0
geneSymbol

## Sheet: EdgeR | Group | D7Coc | D0
geneSymbol

## Sheet: DESeq2 | Group | D7Coc | D0
geneSymbol

## Sheet: EdgeR | Group | D7Alo | D3
geneSymbol

[truncated: 11 more sheets: DESeq2 | Group | D7Alo | D3, EdgeR | Group | D7Cdn | D3, DESeq2 | Group | D7Cdn | D3, EdgeR | Group | D7Coc | D3, DESeq2 | Group | D7Coc | D3, EdgeR | Group | D7Cdn | D7Alo, DESeq2 | Group | D7Cdn | D7Alo, EdgeR | Group | D7Coc | D7Alo, DESeq2 | Group | D7Coc | D7Alo, EdgeR | Group | D7Coc | D7Cdn, DESeq2 | Group | D7Coc | D7Cdn]
