# Supplementary material for: Direct contact between iPSC-derived macrophages and hepatocytes drives reciprocal acquisition of Kupffer cell identity and hepatocyte maturation
Source: bioRxiv preprint, doi:10.1101/2025.08.26.672295, version 2 (2026-04-01)
Supplement: Supp Table 9 [file 672295_file12.xlsx]

## Sheet: GO- Conditionmedia and LiverMac
	ID	Description	GeneRatio	BgRatio	pvalue	p.adjust	qvalue	geneID	Count
GO:0043010	GO:0043010	camera-type eye development	24/487	332/18866	6.17384950598038e-06	0.0169988	0.0154497	ACTL6A/CDON/HSF4/LRP5/NES/NRL/PRPH2/RAB11FIP4/RARA/RRM1/SKI/SPRED3/TMOD1/WNT5A/FGF2/NHS/RHOJ/SHROOM2/THY1/NTRK2/RORB/RP1L1/SLC7A11/SOX8	24
GO:0150063	GO:0150063	visual system development	26/487	388/18866	9.94420860708571e-06	0.0169988	0.0154497	ACTL6A/CDON/CNTF/HSF4/ITGAM/LRP5/NES/NRL/PRPH2/RAB11FIP4/RARA/RRM1/SKI/SPRED3/TMOD1/WNT5A/FGF2/NHS/RHOJ/SHROOM2/THY1/NTRK2/RORB/RP1L1/SLC7A11/SOX8	26
GO:0048880	GO:0048880	sensory system development	26/487	394/18866	1.30147505725095e-05	0.0169988	0.0154497	ACTL6A/CDON/CNTF/HSF4/ITGAM/LRP5/NES/NRL/PRPH2/RAB11FIP4/RARA/RRM1/SKI/SPRED3/TMOD1/WNT5A/FGF2/NHS/RHOJ/SHROOM2/THY1/NTRK2/RORB/RP1L1/SLC7A11/SOX8	26
GO:0001819	GO:0001819	positive regulation of cytokine production	28/487	447/18866	1.59016057279767e-05	0.0169988	0.0154497	BCL3/CD274/IL17RC/IL1A/IL20RB/IL27RA/IL6ST/IRF4/MAPK13/MCOLN2/NOD1/NOX1/POLR2H/PYHIN1/RARA/RGCC/RORA/RSAD2/SPON2/TLR1/TLR9/TMIGD2/TRPV4/WNT5A/GBP5/WNT11/ZBP1/PRKCZ	28
GO:0001654	GO:0001654	eye development	25/487	384/18866	2.38907630249937e-05	0.0204314	0.0185694	ACTL6A/CDON/CNTF/HSF4/LRP5/NES/NRL/PRPH2/RAB11FIP4/RARA/RRM1/SKI/SPRED3/TMOD1/WNT5A/FGF2/NHS/RHOJ/SHROOM2/THY1/NTRK2/RORB/RP1L1/SLC7A11/SOX8	25
GO:0060041	GO:0060041	retina development in camera-type eye	14/487	150/18866	3.52021887154472e-05	0.0250874	0.0228011	ACTL6A/CDON/LRP5/NRL/PRPH2/RAB11FIP4/RRM1/SKI/RHOJ/THY1/NTRK2/RORB/RP1L1/SOX8	14
GO:0050727	GO:0050727	regulation of inflammatory response	26/487	425/18866	4.73855405938397e-05	0.0289458	0.0263079	AHSG/ALOX15/ALOX5/APOA1/BCR/CD200R1/DROSHA/GPX1/IL17RC/IL20RB/IL6ST/LRFN5/MAPK13/RORA/STK39/TGM2/TLR9/TRPV4/WNT5A/F2/FPR2/GBP5/IL1R2/ZBP1/CASP12/CNR2	26
GO:1902905	GO:1902905	positive regulation of supramolecular fiber organization	16/487	208/18866	0.000104895	0.0560663	0.0509568	ALOX15/APOA1/CDK5R1/GPX1/LPAR1/MLST8/MYLK3/NCKAP1L/PFN2/RGCC/TRPV4/WHAMMP3/PDXP/VIL1/WNT11/HIP1R	16
GO:0046530	GO:0046530	photoreceptor cell differentiation	8/487	63/18866	0.000207393	0.0985348	0.0895551	CNTF/IFT20/NRL/THY1/NTRK2/RORB/RP1L1/SOX8	8
GO:0060221	GO:0060221	retinal rod cell differentiation	4/487	13/18866	0.000260524	0.106184	0.0965067	NRL/NTRK2/RORB/SOX8	4
GO:0002088	GO:0002088	lens development in camera-type eye	9/487	83/18866	0.000285792	0.106184	0.0965067	CDON/SKI/SPRED3/TMOD1/WNT5A/FGF2/NHS/SHROOM2/SLC7A11	9
GO:1902903	GO:1902903	regulation of supramolecular fiber organization	22/487	373/18866	0.000297989	0.106184	0.0965067	ALOX15/APOA1/CDK5R1/CHADL/GPX1/LPAR1/MLST8/MYLK3/NCKAP1L/PFN2/RGCC/SSH3/TMOD1/TRPV4/WHAMMP3/CLIP3/DLC1/PDXP/SLC39A12/VIL1/WNT11/HIP1R	22
GO:0051495	GO:0051495	positive regulation of cytoskeleton organization	16/487	230/18866	0.000331164	0.108927	0.0990005	ALOX15/APOA1/CDK5R1/LPAR1/MLST8/MYLK3/NCKAP1L/NES/PFN2/RGCC/TRPV4/WHAMMP3/PDXP/VIL1/WNT11/HIP1R	16
GO:0007188	GO:0007188	adenylate cyclase-modulating G protein-coupled receptor signaling pathway	16/487	233/18866	0.000382447	0.11681	0.106165	ADGRG6/GNAZ/GPR161/LPAR1/PTGIR/VIPR1/ADCY1/CALCR/FPR2/GNA14/GPR12/OXER1/ADCY8/ADGRE1/CNR2/RXFP1	16
GO:0060219	GO:0060219	camera-type eye photoreceptor cell differentiation	5/487	26/18866	0.0004715	0.134409	0.12216	NRL/THY1/NTRK2/RORB/SOX8	5
GO:0007187	GO:0007187	G protein-coupled receptor signaling pathway, coupled to cyclic nucleotide second messenger	17/487	263/18866	0.00051076	0.136501	0.124061	ADGRG6/GNAZ/GPR161/HTR7/LPAR1/PTGIR/VIPR1/ADCY1/CALCR/FPR2/GNA14/GPR12/OXER1/ADCY8/ADGRE1/CNR2/RXFP1	17
GO:0003281	GO:0003281	ventricular septum development	8/487	76/18866	0.000754198	0.151923	0.138078	ACVR1/FZD1/HECTD1/NOS3/SMAD6/WNT5A/VANGL2/WNT11	8
GO:0018108	GO:0018108	peptidyl-tyrosine phosphorylation	21/487	374/18866	0.000768229	0.151923	0.138078	AATK/ACVR1/ALK/ANGPT4/CNTF/DYRK3/EPHB6/HBEGF/IL6ST/ITGB3/MAP2K6/MLST8/NCAPG2/TAL1/CADM4/FRK/MELK/THY1/NTRK2/PDGFD/PRKCZ	21
GO:0060411	GO:0060411	cardiac septum morphogenesis	8/487	77/18866	0.000823004	0.151923	0.138078	ACVR1/FZD1/NOS3/RARA/SMAD6/WNT5A/VANGL2/WNT11	8
GO:0018212	GO:0018212	peptidyl-tyrosine modification	21/487	377/18866	0.00085025	0.151923	0.138078	AATK/ACVR1/ALK/ANGPT4/CNTF/DYRK3/EPHB6/HBEGF/IL6ST/ITGB3/MAP2K6/MLST8/NCAPG2/TAL1/CADM4/FRK/MELK/THY1/NTRK2/PDGFD/PRKCZ	21
GO:0060042	GO:0060042	retina morphogenesis in camera-type eye	7/487	60/18866	0.000866324	0.151923	0.138078	CDON/LRP5/NRL/THY1/NTRK2/RORB/SOX8	7
GO:0043367	GO:0043367	CD4-positive, alpha-beta T cell differentiation	8/487	78/18866	0.000896761	0.151923	0.138078	BCL3/IRF4/NCKAP1L/RARA/RORA/RSAD2/SEMA4A/PRKCZ	8
GO:0035710	GO:0035710	CD4-positive, alpha-beta T cell activation	9/487	97/18866	0.000904913	0.151923	0.138078	BCL3/CD274/IRF4/NCKAP1L/RARA/RORA/RSAD2/SEMA4A/PRKCZ	9
GO:0001508	GO:0001508	action potential	11/487	138/18866	0.000917147	0.151923	0.138078	GPR35/KCNJ5/KCNMB4/NUP155/SLC4A3/YWHAH/GJC1/GNA14/CNR2/KCNA1/NTRK2	11
GO:1903522	GO:1903522	regulation of blood circulation	18/487	303/18866	0.000948891	0.151923	0.138078	ARHGAP42/FXYD2/GCH1/HBEGF/KCNJ5/KCNK6/KCNMB4/NOS3/NPR2/NUP155/OXTR/RNLS/SLC4A3/APLN/FXYD7/GJC1/KCNJ12/CACNG5	18
GO:0035637	GO:0035637	multicellular organismal signaling	14/487	206/18866	0.000961886	0.151923	0.138078	FXYD2/GPR35/KCNJ5/KCNK6/KCNMB4/NPR2/NUP155/SLC4A3/FXYD7/GJC1/KCNJ12/CACNG5/KCNA1/NTRK2	14
GO:0071347	GO:0071347	cellular response to interleukin-1	13/487	183/18866	0.000964333	0.151923	0.138078	GBP2/IKBKB/IL1A/MAPK13/MYLK3/NOD1/PELI2/PSMD11/PSMD13/RORA/IL1R2/IRAK4/ZBP1	13
GO:0060412	GO:0060412	ventricular septum morphogenesis	6/487	45/18866	0.000994819	0.151923	0.138078	ACVR1/FZD1/NOS3/WNT5A/VANGL2/WNT11	6
GO:0007266	GO:0007266	Rho protein signal transduction	11/487	140/18866	0.00103243	0.15223	0.138357	APOA1/ARHGAP42/BCR/CDH13/GPR35/LPAR1/P2RY10/DLC1/NGFR/RHOJ/VANGL2	11
GO:0030100	GO:0030100	regulation of endocytosis	14/487	210/18866	0.00115738	0.16214	0.147364	ACTN4/ALOX15/ARC/ATXN2/BMP2K/CDH13/ITGB3/NCKAP1L/WNT5A/APLN/CLIP3/CD22/HIP1R/SFRP4	14
GO:0008217	GO:0008217	regulation of blood pressure	13/487	187/18866	0.00117548	0.16214	0.147364	ARHGAP42/CES1/GCH1/KCNK6/LRP5/NOS3/NOX1/NPR2/OXTR/RNLS/SLC2A5/STK39/APLN	13
GO:0045776	GO:0045776	negative regulation of blood pressure	6/487	47/18866	0.00125577	0.163986	0.149041	ARHGAP42/GCH1/KCNK6/NOS3/RNLS/APLN	6
GO:0046173	GO:0046173	polyol biosynthetic process	7/487	64/18866	0.0012757	0.163986	0.149041	CYP3A4/GCH1/IMPA2/PGP/PPIP5K1/FGF2/PDXP	7
GO:0060047	GO:0060047	heart contraction	17/487	287/18866	0.00134219	0.163986	0.149041	FXYD2/GCH1/GPX1/HBEGF/KCNJ5/KCNK6/MAP2K6/NOS3/NPR2/NUP155/RNLS/SLC4A3/APLN/FXYD7/GJC1/KCNJ12/CACNG5	17
GO:0070498	GO:0070498	interleukin-1-mediated signaling pathway	9/487	103/18866	0.0013877	0.163986	0.149041	IKBKB/IL1A/NOD1/PELI2/PSMD11/PSMD13/IL1R2/IRAK4/ZBP1	9
GO:0042461	GO:0042461	photoreceptor cell development	6/487	48/18866	0.00140439	0.163986	0.149041	IFT20/NRL/THY1/NTRK2/RORB/RP1L1	6
GO:0007200	GO:0007200	phospholipase C-activating G protein-coupled receptor signaling pathway	9/487	104/18866	0.00148527	0.163986	0.149041	FPR3/GPR35/LPAR1/P2RY10/TGM2/F2/FPR2/GNA14/NMUR1	9
GO:0048593	GO:0048593	camera-type eye morphogenesis	10/487	125/18866	0.00150613	0.163986	0.149041	CDON/LRP5/NRL/SKI/WNT5A/SHROOM2/THY1/NTRK2/RORB/SOX8	10
GO:1901881	GO:1901881	positive regulation of protein depolymerization	4/487	20/18866	0.00152954	0.163986	0.149041	NES/TRPV4/PDXP/VIL1	4
GO:0007189	GO:0007189	adenylate cyclase-activating G protein-coupled receptor signaling pathway	11/487	147/18866	0.00153401	0.163986	0.149041	ADGRG6/GPR161/LPAR1/PTGIR/ADCY1/CALCR/GPR12/ADCY8/ADGRE1/CNR2/RXFP1	11
GO:0046632	GO:0046632	alpha-beta T cell differentiation	9/487	106/18866	0.00169694	0.174973	0.159027	BCL3/IRF4/NCKAP1L/RARA/RORA/RSAD2/SEMA4A/ZBTB16/PRKCZ	9
GO:0007265	GO:0007265	Ras protein signal transduction	19/487	346/18866	0.00173716	0.174973	0.159027	APOA1/ARHGAP42/BCR/CDH13/FBP1/GPR35/LPAR1/LZTR1/MAPRE2/P2RY10/RAB33A/RALGDS/ARHGAP24/CADM4/DLC1/FGF2/NGFR/RHOJ/VANGL2	19
GO:0046548	GO:0046548	retinal rod cell development	3/487	10/18866	0.00179173	0.174973	0.159027	NRL/NTRK2/RORB	3
GO:0042110	GO:0042110	T cell activation	24/487	483/18866	0.00180047	0.174973	0.159027	BCL3/BTN3A1/CD274/DROSHA/IL1A/IL20RB/IL27RA/IL6ST/IL7R/IRF4/NCKAP1L/RARA/RORA/RSAD2/SEMA4A/SLA2/SPINK5/TMIGD2/TNFSF14/VNN1/NHEJ1/THY1/ZBTB16/PRKCZ	24
GO:0002576	GO:0002576	platelet degranulation	10/487	129/18866	0.00190666	0.179632	0.163261	ACTN4/AHSG/APOA1/CTSW/HABP4/ITGB3/LGALS3BP/PPBP/ISLR/MMRN1	10
GO:0003015	GO:0003015	heart process	17/487	297/18866	0.00193243	0.179632	0.163261	FXYD2/GCH1/GPX1/HBEGF/KCNJ5/KCNK6/MAP2K6/NOS3/NPR2/NUP155/RNLS/SLC4A3/APLN/FXYD7/GJC1/KCNJ12/CACNG5	17
GO:0003206	GO:0003206	cardiac chamber morphogenesis	10/487	131/18866	0.00213693	0.19292	0.175339	ACVR1/ADGRG6/FZD1/NOS3/RARA/SMAD6/WNT5A/SHOX2/VANGL2/WNT11	10
GO:0019751	GO:0019751	polyol metabolic process	10/487	132/18866	0.00226018	0.19292	0.175339	CYP3A4/GCH1/IMPA2/PGP/PLCB4/PPIP5K1/FGF2/NUDT11/PDXP/SGPP2	10
GO:0048592	GO:0048592	eye morphogenesis	11/487	156/18866	0.00245549	0.19292	0.175339	CDON/CNTF/LRP5/NRL/SKI/WNT5A/SHROOM2/THY1/NTRK2/RORB/SOX8	11
GO:0051480	GO:0051480	regulation of cytosolic calcium ion concentration	19/487	357/18866	0.00246929	0.19292	0.175339	ACKR3/FPR3/GPR35/LPAR1/MCOLN2/OXTR/P2RY10/PTGIR/TGM2/TRPV4/WNT5A/CALCR/F2/FGF2/FPR2/THY1/ADCY8/PROK2/TMEM178A	19
GO:2000273	GO:2000273	positive regulation of signaling receptor activity	5/487	37/18866	0.00247511	0.19292	0.175339	ARC/HBEGF/NCAPG2/TAL1/RGS9	5
GO:0030217	GO:0030217	T cell differentiation	15/487	253/18866	0.00249678	0.19292	0.175339	BCL3/DROSHA/IL1A/IL7R/IRF4/NCKAP1L/RARA/RORA/RSAD2/SEMA4A/SPINK5/VNN1/NHEJ1/ZBTB16/PRKCZ	15
GO:0001503	GO:0001503	ossification	21/487	412/18866	0.00252	0.19292	0.175339	ACVR1/AHSG/ALOX15/ALOX5/AMELX/BMP2K/FZD1/IL6ST/LRP5/NAB2/NPR2/SKI/SMAD6/WNT5A/IGSF10/SHOX2/WNT11/ZBTB16/RANBP3L/RORB/SOX8	21
GO:0032147	GO:0032147	activation of protein kinase activity	18/487	331/18866	0.00252202	0.19292	0.175339	ALK/ANGPT4/CDK5R1/ITGB3/LPAR1/MAP2K6/MLST8/NCKAP1L/NOD1/RGCC/STK39/WNT5A/ADCY1/FGF2/WNT11/ADCY8/PRKCZ/PROK2	18
GO:0003407	GO:0003407	neural retina development	7/487	72/18866	0.00253646	0.19292	0.175339	ACTL6A/NRL/RAB11FIP4/THY1/NTRK2/RORB/SOX8	7
GO:0022409	GO:0022409	positive regulation of cell-cell adhesion	16/487	279/18866	0.00254368	0.19292	0.175339	ALOX15/ALOX5/CD274/IL1A/IL27RA/IL6ST/IL7R/NCKAP1L/RARA/TMIGD2/TNFSF14/VNN1/WNT5A/THY1/ZBTB16/PRKCZ	16
GO:1900407	GO:1900407	regulation of cellular response to oxidative stress	8/487	92/18866	0.00260437	0.19292	0.175339	ALOX5/FUT8/FZD1/GCH1/GPX1/NOX1/VNN1/SLC7A11	8
GO:0045619	GO:0045619	regulation of lymphocyte differentiation	12/487	181/18866	0.00266218	0.19292	0.175339	DROSHA/HMGB3/IL1A/IL7R/IRF4/NCKAP1L/RARA/SPINK5/TLR9/VNN1/ZBTB16/PRKCZ	12
GO:0062197	GO:0062197	cellular response to chemical stress	19/487	360/18866	0.0027089	0.19292	0.175339	ALOX5/FOXO1/FUT8/FZD1/GCH1/GPX1/LRRC8D/MAPK13/NOS3/NOX1/STK39/TP53INP1/TRPV4/VNN1/MELK/TXNRD2/DHRS2/PDGFD/SLC7A11	19
GO:0032733	GO:0032733	positive regulation of interleukin-10 production	5/487	38/18866	0.00279063	0.19292	0.175339	CD274/IL20RB/IRF4/TLR9/PRKCZ	5
GO:0008016	GO:0008016	regulation of heart contraction	15/487	256/18866	0.00279294	0.19292	0.175339	FXYD2/GCH1/HBEGF/KCNJ5/KCNK6/NOS3/NPR2/NUP155/RNLS/SLC4A3/APLN/FXYD7/GJC1/KCNJ12/CACNG5	15
GO:0003279	GO:0003279	cardiac septum development	9/487	114/18866	0.00279725	0.19292	0.175339	ACVR1/FZD1/HECTD1/NOS3/RARA/SMAD6/WNT5A/VANGL2/WNT11	9
GO:0032753	GO:0032753	positive regulation of interleukin-4 production	4/487	24/18866	0.00309192	0.197731	0.179711	IL20RB/IRF4/RARA/PRKCZ	4
GO:0034123	GO:0034123	positive regulation of toll-like receptor signaling pathway	4/487	24/18866	0.00309192	0.197731	0.179711	RSAD2/TLR1/TLR9/TREML4	4
GO:0014037	GO:0014037	Schwann cell differentiation	5/487	39/18866	0.00313426	0.197731	0.179711	ADGRG6/NAB2/SKI/PRX/NTRK2	5
GO:0042092	GO:0042092	type 2 immune response	5/487	39/18866	0.00313426	0.197731	0.179711	BCL3/IL27RA/RARA/RSAD2/PRKCZ	5
GO:0032736	GO:0032736	positive regulation of interleukin-13 production	3/487	12/18866	0.00316083	0.197731	0.179711	IRF4/RARA/PRKCZ	3
GO:0051549	GO:0051549	positive regulation of keratinocyte migration	3/487	12/18866	0.00316083	0.197731	0.179711	EPB41L4B/HBEGF/MAPRE2	3
GO:0035019	GO:0035019	somatic stem cell population maintenance	7/487	75/18866	0.00319958	0.197731	0.179711	DPPA4/LRP5/POLR2H/SKI/ASCL2/FGF2/VANGL2	7
GO:0045444	GO:0045444	fat cell differentiation	14/487	235/18866	0.00328319	0.197731	0.179711	ALOX5/BBS12/FOXO1/GPX1/LRG1/LRP5/RORA/SMAD6/TRPV4/WNT5A/CLIP3/ZBTB16/FNDC5/SOX8	14
GO:1903039	GO:1903039	positive regulation of leukocyte cell-cell adhesion	14/487	235/18866	0.00328319	0.197731	0.179711	ALOX5/CD274/IL1A/IL27RA/IL6ST/IL7R/NCKAP1L/RARA/TMIGD2/TNFSF14/VNN1/THY1/ZBTB16/PRKCZ	14
GO:0070555	GO:0070555	response to interleukin-1	13/487	211/18866	0.00340891	0.201948	0.183544	GBP2/IKBKB/IL1A/MAPK13/MYLK3/NOD1/PELI2/PSMD11/PSMD13/RORA/IL1R2/IRAK4/ZBP1	13
GO:0060193	GO:0060193	positive regulation of lipase activity	7/487	76/18866	0.00344766	0.201948	0.183544	APOA1/LPAR1/PLIN5/FGF2/NMUR1/NTRK2/PRKCZ	7
GO:0001667	GO:0001667	ameboidal-type cell migration	23/487	481/18866	0.00357859	0.206784	0.18794	ACVR1/ANGPT4/APOA1/CDH13/EPB41L4B/GPX1/HBEGF/ITGB3/LGALS8/LRP5/MAPRE2/NOS3/PFN2/PTPRR/RGCC/SEMA4A/WNT5A/ALX1/FGF2/RHOJ/VIL1/WNT11/SOX8	23
GO:0007422	GO:0007422	peripheral nervous system development	7/487	77/18866	0.00371013	0.211527	0.19225	ADGRG6/ALDH3A2/NAB2/SKI/PRX/NTRK2/SOX8	7
GO:0050870	GO:0050870	positive regulation of T cell activation	13/487	214/18866	0.00384268	0.215128	0.195523	CD274/IL1A/IL27RA/IL6ST/IL7R/NCKAP1L/RARA/TMIGD2/TNFSF14/VNN1/THY1/ZBTB16/PRKCZ	13
GO:0033089	GO:0033089	positive regulation of T cell differentiation in thymus	3/487	13/18866	0.00403092	0.215128	0.195523	IL1A/IL7R/VNN1	3
GO:0090179	GO:0090179	planar cell polarity pathway involved in neural tube closure	3/487	13/18866	0.00403092	0.215128	0.195523	FZD1/WNT5A/VANGL2	3
GO:0043312	GO:0043312	neutrophil degranulation	23/487	487/18866	0.00415774	0.215128	0.195523	ACAA1/AHSG/ALDOC/ALOX5/BCR/CANT1/CRISPLD2/GGH/ITGAM/LRG1/METTL7A/NCKAP1L/PPBP/PSMD11/PSMD13/SLC2A3/SLC2A5/UBR4/VNN1/FPR2/FRK/MGAM/RNASE3	23
GO:0040037	GO:0040037	negative regulation of fibroblast growth factor receptor signaling pathway	4/487	26/18866	0.0041768	0.215128	0.195523	WNT5A/APLN/FGF2/NGFR	4
GO:0042832	GO:0042832	defense response to protozoan	4/487	26/18866	0.0041768	0.215128	0.195523	BCL3/GBP2/GBP4/IRF4	4
GO:0050921	GO:0050921	positive regulation of chemotaxis	10/487	144/18866	0.00423481	0.215128	0.195523	CDH13/LPAR1/NCKAP1L/STK39/TNFSF14/TRPV4/WNT5A/FGF2/FPR2/PDGFD	10
GO:0034765	GO:0034765	regulation of ion transmembrane transport	23/487	489/18866	0.00436741	0.215128	0.195523	ACTN4/ARC/CLIC6/FXYD2/GPR35/KCNJ5/KCNK5/KCNK6/NOX1/STK39/TLR9/YWHAH/ANO9/CALCR/F2/FXYD7/KCNJ12/KCNS2/THY1/CACNG5/KCNA1/KCNA10/RGS9	23
GO:0007204	GO:0007204	positive regulation of cytosolic calcium ion concentration	17/487	322/18866	0.0044144	0.215128	0.195523	ACKR3/FPR3/GPR35/LPAR1/MCOLN2/OXTR/P2RY10/PTGIR/TGM2/TRPV4/CALCR/F2/FGF2/FPR2/THY1/ADCY8/PROK2	17
GO:0042093	GO:0042093	T-helper cell differentiation	6/487	60/18866	0.00442103	0.215128	0.195523	BCL3/IRF4/RARA/RORA/SEMA4A/PRKCZ	6
GO:0002283	GO:0002283	neutrophil activation involved in immune response	23/487	490/18866	0.00447551	0.215128	0.195523	ACAA1/AHSG/ALDOC/ALOX5/BCR/CANT1/CRISPLD2/GGH/ITGAM/LRG1/METTL7A/NCKAP1L/PPBP/PSMD11/PSMD13/SLC2A3/SLC2A5/UBR4/VNN1/FPR2/FRK/MGAM/RNASE3	23
GO:1902882	GO:1902882	regulation of response to oxidative stress	8/487	101/18866	0.00462908	0.215128	0.195523	ALOX5/FUT8/FZD1/GCH1/GPX1/NOX1/VNN1/SLC7A11	8
GO:0046578	GO:0046578	regulation of Ras protein signal transduction	12/487	194/18866	0.00465873	0.215128	0.195523	APOA1/ARHGAP42/BCR/FBP1/GPR35/LPAR1/LZTR1/MAPRE2/P2RY10/ARHGAP24/CADM4/DLC1	12
GO:0002683	GO:0002683	negative regulation of immune system process	22/487	463/18866	0.00466277	0.215128	0.195523	ALOX15/AMBP/APOA1/BCR/CD200R1/CD274/GPX1/HMGB3/IL20RB/IL27RA/IL7R/LRFN5/NCAPG2/RARA/SLA2/SPINK5/TAL1/THY1/ZBTB16/CD22/CNR2/TMEM178A	22
GO:0046631	GO:0046631	alpha-beta T cell activation	10/487	146/18866	0.00466694	0.215128	0.195523	BCL3/CD274/IRF4/NCKAP1L/RARA/RORA/RSAD2/SEMA4A/ZBTB16/PRKCZ	10
GO:0001562	GO:0001562	response to protozoan	4/487	27/18866	0.00480468	0.215128	0.195523	BCL3/GBP2/GBP4/IRF4	4
GO:0032438	GO:0032438	melanosome organization	4/487	27/18866	0.00480468	0.215128	0.195523	BLOC1S4/KIF13A/PMEL/SHROOM2	4
GO:0003306	GO:0003306	Wnt signaling pathway involved in heart development	3/487	14/18866	0.00503281	0.215128	0.195523	WNT5A/VANGL2/WNT11	3
GO:0036295	GO:0036295	cellular response to increased oxygen levels	3/487	14/18866	0.00503281	0.215128	0.195523	ATP6V1A/FOXO1/NOX1	3
GO:0042659	GO:0042659	regulation of cell fate specification	3/487	14/18866	0.00503281	0.215128	0.195523	WNT5A/FGF2/WNT11	3
GO:0051547	GO:0051547	regulation of keratinocyte migration	3/487	14/18866	0.00503281	0.215128	0.195523	EPB41L4B/HBEGF/MAPRE2	3
GO:0090178	GO:0090178	regulation of establishment of planar polarity involved in neural tube closure	3/487	14/18866	0.00503281	0.215128	0.195523	FZD1/WNT5A/VANGL2	3
GO:0050728	GO:0050728	negative regulation of inflammatory response	12/487	196/18866	0.00505121	0.215128	0.195523	ALOX5/APOA1/BCR/CD200R1/GPX1/IL20RB/LRFN5/RORA/F2/FPR2/IL1R2/CNR2	12
GO:0061337	GO:0061337	cardiac conduction	10/487	148/18866	0.005133	0.215128	0.195523	FXYD2/KCNJ5/KCNK6/NPR2/NUP155/SLC4A3/FXYD7/GJC1/KCNJ12/CACNG5	10
GO:0002294	GO:0002294	CD4-positive, alpha-beta T cell differentiation involved in immune response	6/487	62/18866	0.00519997	0.215128	0.195523	BCL3/IRF4/RARA/RORA/SEMA4A/PRKCZ	6
GO:0032233	GO:0032233	positive regulation of actin filament bundle assembly	6/487	62/18866	0.00519997	0.215128	0.195523	APOA1/LPAR1/PFN2/RGCC/VIL1/WNT11	6
GO:0048661	GO:0048661	positive regulation of smooth muscle cell proliferation	8/487	103/18866	0.00520966	0.215128	0.195523	CDH13/HBEGF/NOX1/RBPMS2/TGM2/FGF2/IRAK4/PDGFD	8
GO:2000404	GO:2000404	regulation of T cell migration	5/487	44/18866	0.00532173	0.215128	0.195523	CD200R1/IL27RA/STK39/TNFSF14/WNT5A	5
GO:0048660	GO:0048660	regulation of smooth muscle cell proliferation	11/487	173/18866	0.00539059	0.215128	0.195523	CDH13/HBEGF/NOS3/NOX1/PTGIR/RBPMS2/TGM2/APLN/FGF2/IRAK4/PDGFD	11
GO:0010575	GO:0010575	positive regulation of vascular endothelial growth factor production	4/487	28/18866	0.00549294	0.215128	0.195523	IL1A/IL6ST/NOX1/RORA	4
GO:0022011	GO:0022011	myelination in peripheral nervous system	4/487	28/18866	0.00549294	0.215128	0.195523	ADGRG6/SKI/PRX/NTRK2	4
GO:0032292	GO:0032292	peripheral nervous system axon ensheathment	4/487	28/18866	0.00549294	0.215128	0.195523	ADGRG6/SKI/PRX/NTRK2	4
GO:0048753	GO:0048753	pigment granule organization	4/487	28/18866	0.00549294	0.215128	0.195523	BLOC1S4/KIF13A/PMEL/SHROOM2	4
GO:0003205	GO:0003205	cardiac chamber development	11/487	174/18866	0.00562492	0.215128	0.195523	ACVR1/ADGRG6/FZD1/HECTD1/NOS3/RARA/SMAD6/WNT5A/SHOX2/VANGL2/WNT11	11
GO:0002287	GO:0002287	alpha-beta T cell activation involved in immune response	6/487	63/18866	0.00562507	0.215128	0.195523	BCL3/IRF4/RARA/RORA/SEMA4A/PRKCZ	6
GO:0002293	GO:0002293	alpha-beta T cell differentiation involved in immune response	6/487	63/18866	0.00562507	0.215128	0.195523	BCL3/IRF4/RARA/RORA/SEMA4A/PRKCZ	6
GO:0045580	GO:0045580	regulation of T cell differentiation	10/487	150/18866	0.00563479	0.215128	0.195523	DROSHA/IL1A/IL7R/IRF4/NCKAP1L/RARA/SPINK5/VNN1/ZBTB16/PRKCZ	10
GO:0001935	GO:0001935	endothelial cell proliferation	12/487	199/18866	0.00568892	0.215273	0.195654	ALOX5/APOA1/CDH13/ITGB3/LRG1/RGCC/WNT5A/APLN/FGF2/NGFR/TNMD/PROK2	12
GO:0048659	GO:0048659	smooth muscle cell proliferation	11/487	175/18866	0.00586721	0.2181	0.198224	CDH13/HBEGF/NOS3/NOX1/PTGIR/RBPMS2/TGM2/APLN/FGF2/IRAK4/PDGFD	11
GO:0050863	GO:0050863	regulation of T cell activation	17/487	332/18866	0.00595709	0.2181	0.198224	CD274/DROSHA/IL1A/IL20RB/IL27RA/IL6ST/IL7R/IRF4/NCKAP1L/RARA/SPINK5/TMIGD2/TNFSF14/VNN1/THY1/ZBTB16/PRKCZ	17
GO:0110053	GO:0110053	regulation of actin filament organization	15/487	278/18866	0.00596936	0.2181	0.198224	ALOX15/APOA1/LPAR1/MLST8/NCKAP1L/PFN2/RGCC/SSH3/TMOD1/WHAMMP3/DLC1/PDXP/VIL1/WNT11/HIP1R	15
GO:0032956	GO:0032956	regulation of actin cytoskeleton organization	18/487	360/18866	0.00602641	0.2181	0.198224	ALOX15/APOA1/CDK5R1/LPAR1/MLST8/MYLK3/NCKAP1L/PFN2/RGCC/SSH3/TMOD1/WHAMMP3/DLC1/PDXP/VANGL2/VIL1/WNT11/HIP1R	18
GO:0018158	GO:0018158	protein oxidation	3/487	15/18866	0.00617167	0.2181	0.198224	APOA1/GPX1/TRABD2A	3
GO:0045064	GO:0045064	T-helper 2 cell differentiation	3/487	15/18866	0.00617167	0.2181	0.198224	BCL3/RARA/PRKCZ	3
GO:0060026	GO:0060026	convergent extension	3/487	15/18866	0.00617167	0.2181	0.198224	WNT5A/VANGL2/WNT11	3
GO:0090177	GO:0090177	establishment of planar polarity involved in neural tube closure	3/487	15/18866	0.00617167	0.2181	0.198224	FZD1/WNT5A/VANGL2	3
GO:0001754	GO:0001754	eye photoreceptor cell differentiation	5/487	46/18866	0.00644103	0.225753	0.205179	NRL/THY1/NTRK2/RORB/SOX8	5
GO:0043254	GO:0043254	regulation of protein-containing complex assembly	21/487	449/18866	0.00669955	0.232905	0.211679	ALOX15/CDK5R1/MLST8/MPP7/NCKAP1L/PFN2/PREB/SAR1B/SMAD6/SSH3/TAL1/TMOD1/WHAMMP3/CLIP3/FBLIM1/GBP5/SLC39A12/VIL1/HIP1R/PRKCZ/TRABD2A	21
GO:0035023	GO:0035023	regulation of Rho protein signal transduction	7/487	86/18866	0.00680739	0.234745	0.213352	APOA1/ARHGAP42/BCR/GPR35/LPAR1/P2RY10/DLC1	7
GO:0010631	GO:0010631	epithelial cell migration	18/487	365/18866	0.0069142	0.234773	0.213377	ANGPT4/APOA1/CDH13/EPB41L4B/GPX1/HBEGF/ITGB3/LGALS8/MAPRE2/NOS3/PFN2/PTPRR/RGCC/SEMA4A/WNT5A/FGF2/RHOJ/VIL1	18
GO:0098657	GO:0098657	import into cell	13/487	230/18866	0.00697081	0.234773	0.213377	ARC/FXYD2/ITGB3/KCNJ5/KCNK5/SLC2A3/SLC2A5/TRPV4/CALCR/KCNJ12/SLC39A12/CACNG5/SLC7A11	13
GO:0034599	GO:0034599	cellular response to oxidative stress	16/487	310/18866	0.0069729	0.234773	0.213377	ALOX5/FOXO1/FUT8/FZD1/GCH1/GPX1/MAPK13/NOS3/NOX1/TP53INP1/VNN1/MELK/TXNRD2/DHRS2/PDGFD/SLC7A11	16
GO:0060326	GO:0060326	cell chemotaxis	16/487	311/18866	0.00718226	0.239198	0.2174	ACKR3/ALOX5/GAB1/HBEGF/IL17RC/LPAR1/NCKAP1L/PPBP/STK39/TNFSF14/TRPV4/WNT5A/FGF2/FPR2/CNR2/PDGFD	16
GO:0002830	GO:0002830	positive regulation of type 2 immune response	3/487	16/18866	0.007452	0.239198	0.2174	RARA/RSAD2/PRKCZ	3
GO:0010820	GO:0010820	positive regulation of T cell chemotaxis	3/487	16/18866	0.007452	0.239198	0.2174	STK39/TNFSF14/WNT5A	3
GO:0019372	GO:0019372	lipoxygenase pathway	3/487	16/18866	0.007452	0.239198	0.2174	ALOX15/ALOX5/GPX1	3
GO:0042074	GO:0042074	cell migration involved in gastrulation	3/487	16/18866	0.007452	0.239198	0.2174	LRP5/WNT5A/WNT11	3
GO:0030098	GO:0030098	lymphocyte differentiation	18/487	368/18866	0.00749593	0.239198	0.2174	BCL3/DROSHA/HMGB3/IL1A/IL7R/IRF4/NCKAP1L/RARA/RORA/RSAD2/SEMA4A/SPINK5/TLR9/VNN1/LYL1/NHEJ1/ZBTB16/PRKCZ	18
GO:0090132	GO:0090132	epithelium migration	18/487	368/18866	0.00749593	0.239198	0.2174	ANGPT4/APOA1/CDH13/EPB41L4B/GPX1/HBEGF/ITGB3/LGALS8/MAPRE2/NOS3/PFN2/PTPRR/RGCC/SEMA4A/WNT5A/FGF2/RHOJ/VIL1	18
GO:0098739	GO:0098739	import across plasma membrane	10/487	157/18866	0.0076986	0.24207	0.22001	FXYD2/KCNJ5/KCNK5/SLC2A3/SLC2A5/TRPV4/CALCR/KCNJ12/SLC39A12/SLC7A11	10
GO:0032755	GO:0032755	positive regulation of interleukin-6 production	7/487	88/18866	0.00769915	0.24207	0.22001	IL1A/MAPK13/NOD1/SPON2/TLR1/TLR9/WNT5A	7
GO:0090288	GO:0090288	negative regulation of cellular response to growth factor stimulus	11/487	182/18866	0.00780152	0.243499	0.221308	FZD1/RBPMS2/SKI/SMAD6/SPRED3/WNT5A/APLN/CADM4/FGF2/NGFR/TNMD	11
GO:0002828	GO:0002828	regulation of type 2 immune response	4/487	31/18866	0.00794398	0.244377	0.222107	IL27RA/RARA/RSAD2/PRKCZ	4
GO:0014044	GO:0014044	Schwann cell development	4/487	31/18866	0.00794398	0.244377	0.222107	ADGRG6/SKI/PRX/NTRK2	4
GO:0045785	GO:0045785	positive regulation of cell adhesion	20/487	428/18866	0.00810236	0.245757	0.22336	ALOX15/ALOX5/APOA1/CD274/CDH13/EPB41L4B/IL1A/IL27RA/IL6ST/IL7R/NCKAP1L/RARA/TGM2/TMIGD2/TNFSF14/VNN1/WNT5A/THY1/ZBTB16/PRKCZ	20
GO:0002526	GO:0002526	acute inflammatory response	8/487	111/18866	0.00810376	0.245757	0.22336	ACVR1/AHSG/IL1A/IL20RB/IL6ST/MYLK3/VNN1/F2	8
GO:0050730	GO:0050730	regulation of peptidyl-tyrosine phosphorylation	14/487	263/18866	0.00867737	0.256495	0.23312	ACVR1/ANGPT4/CNTF/HBEGF/IL6ST/ITGB3/MLST8/NCAPG2/TAL1/CADM4/THY1/NTRK2/PDGFD/PRKCZ	14
GO:0090130	GO:0090130	tissue migration	18/487	374/18866	0.00877812	0.256495	0.23312	ANGPT4/APOA1/CDH13/EPB41L4B/GPX1/HBEGF/ITGB3/LGALS8/MAPRE2/NOS3/PFN2/PTPRR/RGCC/SEMA4A/WNT5A/FGF2/RHOJ/VIL1	18
GO:0010819	GO:0010819	regulation of T cell chemotaxis	3/487	17/18866	0.00887767	0.256495	0.23312	STK39/TNFSF14/WNT5A	3
GO:0042249	GO:0042249	establishment of planar polarity of embryonic epithelium	3/487	17/18866	0.00887767	0.256495	0.23312	FZD1/WNT5A/VANGL2	3
GO:0032673	GO:0032673	regulation of interleukin-4 production	4/487	32/18866	0.00889728	0.256495	0.23312	IL20RB/IRF4/RARA/PRKCZ	4
GO:0038128	GO:0038128	ERBB2 signaling pathway	4/487	32/18866	0.00889728	0.256495	0.23312	GAB1/HBEGF/PTPRR/GRB7	4
GO:0051961	GO:0051961	negative regulation of nervous system development	16/487	319/18866	0.00904522	0.256495	0.23312	CDK5R1/CNTF/GPR161/GPR173/LPAR1/SEMA4A/SKI/TRPV4/WNT5A/YWHAH/ASCL2/F2/NGFR/THY1/RFX4/SOX8	16
GO:0050770	GO:0050770	regulation of axonogenesis	11/487	186/18866	0.00911067	0.256495	0.23312	CDH4/CDK5R1/CRABP2/SEMA4A/WNT5A/CHODL/NGFR/SHOX2/THY1/LRRC4C/NTRK2	11
GO:0003044	GO:0003044	regulation of systemic arterial blood pressure mediated by a chemical signal	5/487	50/18866	0.00915604	0.256495	0.23312	CES1/NOS3/NOX1/OXTR/SLC2A5	5
GO:0048546	GO:0048546	digestive tract morphogenesis	5/487	50/18866	0.00915604	0.256495	0.23312	RBPMS2/WNT5A/SHOX2/VANGL2/WNT11	5
GO:0001843	GO:0001843	neural tube closure	7/487	91/18866	0.00919457	0.256495	0.23312	FZD1/RARA/SKI/WNT5A/ALX1/DLC1/VANGL2	7
GO:0030278	GO:0030278	regulation of ossification	12/487	212/18866	0.00922561	0.256495	0.23312	ACVR1/AHSG/ALOX5/BMP2K/IL6ST/LRP5/SKI/SMAD6/WNT5A/ZBTB16/RANBP3L/RORB	12
GO:0072503	GO:0072503	cellular divalent inorganic cation homeostasis	22/487	492/18866	0.00923765	0.256495	0.23312	ACKR3/FPR3/GPR35/LPAR1/MCOLN2/MT1H/OXTR/P2RY10/PTGIR/TGM2/TRPV4/WNT5A/CALCR/F2/FGF2/FPR2/GPR12/SLC39A12/THY1/ADCY8/PROK2/TMEM178A	22
GO:0007015	GO:0007015	actin filament organization	20/487	434/18866	0.00935799	0.257266	0.23382	ACTN4/ALOX15/APOA1/LPAR1/MARCKSL1/MLST8/NCKAP1L/PFN2/RGCC/SSH3/TMOD1/TRPV4/WHAMMP3/CAP2/DLC1/PDXP/SHROOM2/VIL1/WNT11/HIP1R	20
GO:0045582	GO:0045582	positive regulation of T cell differentiation	7/487	92/18866	0.0097373	0.257266	0.23382	IL1A/IL7R/NCKAP1L/RARA/VNN1/ZBTB16/PRKCZ	7
GO:0060606	GO:0060606	tube closure	7/487	92/18866	0.0097373	0.257266	0.23382	FZD1/RARA/SKI/WNT5A/ALX1/DLC1/VANGL2	7
GO:0031345	GO:0031345	negative regulation of cell projection organization	11/487	188/18866	0.00982583	0.257266	0.23382	CDK5R1/LPAR1/PFN2/SEMA4A/TBC1D30/TRPV4/WNT5A/YWHAH/ARHGAP24/NGFR/THY1	11
GO:0002691	GO:0002691	regulation of cellular extravasation	4/487	33/18866	0.00992221	0.257266	0.23382	BCR/IL27RA/THY1/PDGFD	4
GO:0010464	GO:0010464	regulation of mesenchymal cell proliferation	4/487	33/18866	0.00992221	0.257266	0.23382	LRP5/WNT5A/SHOX2/WNT11	4
GO:0035025	GO:0035025	positive regulation of Rho protein signal transduction	4/487	33/18866	0.00992221	0.257266	0.23382	APOA1/GPR35/LPAR1/P2RY10	4
GO:0042573	GO:0042573	retinoic acid metabolic process	4/487	33/18866	0.00992221	0.257266	0.23382	CRABP2/CYP2S1/CYP3A4/RBP1	4
GO:0061311	GO:0061311	cell surface receptor signaling pathway involved in heart development	4/487	33/18866	0.00992221	0.257266	0.23382	ACVR1/WNT5A/VANGL2/WNT11	4
GO:0031623	GO:0031623	receptor internalization	8/487	115/18866	0.00993794	0.257266	0.23382	ACKR3/ARC/ATXN2/ITGB3/APLN/ARR3/CACNG5/SFRP4	8
GO:0032609	GO:0032609	interferon-gamma production	8/487	115/18866	0.00993794	0.257266	0.23382	BCL3/BTN3A1/CD274/IL20RB/IL27RA/RARA/TLR9/WNT5A	8
GO:0002292	GO:0002292	T cell differentiation involved in immune response	6/487	71/18866	0.00998739	0.257266	0.23382	BCL3/IRF4/RARA/RORA/SEMA4A/PRKCZ	6
GO:0055074	GO:0055074	calcium ion homeostasis	21/487	468/18866	0.010439	0.257638	0.234158	ACKR3/FPR3/GPR35/LPAR1/MCOLN2/OXTR/P2RY10/PTGIR/TGM2/TRPV4/WNT5A/CALCR/F2/FGF2/FPR2/GPR12/THY1/ADCY8/PROK2/TMEM178A/TMTC2	21
GO:0090596	GO:0090596	sensory organ morphogenesis	14/487	269/18866	0.0104472	0.257638	0.234158	BCR/CDON/CNTF/LRP5/NRL/SKI/SOBP/WNT5A/SHROOM2/THY1/VANGL2/NTRK2/RORB/SOX8	14
GO:0032656	GO:0032656	regulation of interleukin-13 production	3/487	18/18866	0.0104519	0.257638	0.234158	IRF4/RARA/PRKCZ	3
GO:1905276	GO:1905276	regulation of epithelial tube formation	3/487	18/18866	0.0104519	0.257638	0.234158	FZD1/WNT5A/VANGL2	3
GO:0022407	GO:0022407	regulation of cell-cell adhesion	20/487	439/18866	0.0105203	0.257638	0.234158	ALOX15/ALOX5/APOA1/CD274/IL1A/IL20RB/IL27RA/IL6ST/IL7R/NCKAP1L/RARA/RGCC/TMIGD2/TNFSF14/TRPV4/VNN1/WNT5A/THY1/ZBTB16/PRKCZ	20
GO:0003018	GO:0003018	vascular process in circulatory system	11/487	190/18866	0.0105835	0.257638	0.234158	ARHGAP42/BCR/GCH1/GPX1/HTR7/KCNMB4/MYLK3/NOS3/OXTR/TRPV4/APLN	11
GO:0061035	GO:0061035	regulation of cartilage development	6/487	72/18866	0.0106647	0.257638	0.234158	CHADL/RARA/WNT5A/SHOX2/WNT11/ZBTB16	6
GO:0022604	GO:0022604	regulation of cell morphogenesis	22/487	499/18866	0.0107643	0.257638	0.234158	ACTN4/APOA1/ARC/CDH4/CDK5R1/CRABP2/LPAR1/PARVB/SEMA4A/WNT5A/YWHAH/CHODL/DLC1/F2/FBLIM1/NGFR/RHOJ/SHOX2/THY1/VIL1/LRRC4C/NTRK2	22
GO:0030514	GO:0030514	negative regulation of BMP signaling pathway	5/487	52/18866	0.0107716	0.257638	0.234158	FZD1/RBPMS2/SKI/SMAD6/WNT5A	5
GO:0046580	GO:0046580	negative regulation of Ras protein signal transduction	5/487	52/18866	0.0107716	0.257638	0.234158	ARHGAP42/FBP1/LZTR1/ARHGAP24/DLC1	5
GO:0050999	GO:0050999	regulation of nitric-oxide synthase activity	5/487	52/18866	0.0107716	0.257638	0.234158	GCH1/IL1A/NOD1/NOS3/CNR2	5
GO:0051496	GO:0051496	positive regulation of stress fiber assembly	5/487	52/18866	0.0107716	0.257638	0.234158	APOA1/LPAR1/PFN2/RGCC/WNT11	5
GO:0060349	GO:0060349	bone morphogenesis	7/487	94/18866	0.0108923	0.257638	0.234158	LRP5/NAB2/RARA/SKI/TRPV4/SHOX2/SFRP4	7
GO:0007616	GO:0007616	long-term memory	4/487	34/18866	0.0110207	0.257638	0.234158	ARC/ADCY1/ADCY8/PRKCZ	4
GO:0042759	GO:0042759	long-chain fatty acid biosynthetic process	4/487	34/18866	0.0110207	0.257638	0.234158	ALOX15/ALOX5/CYP2E1/CYP3A4	4
GO:0051482	GO:0051482	positive regulation of cytosolic calcium ion concentration involved in phospholipase C-activating G protein-coupled signaling pathway	4/487	34/18866	0.0110207	0.257638	0.234158	GPR35/LPAR1/P2RY10/TGM2	4
GO:0032535	GO:0032535	regulation of cellular component size	18/487	383/18866	0.0110261	0.257638	0.234158	AKT1S1/ALOX15/CDH4/CDK5R1/CRABP2/IL7R/MLST8/NCKAP1L/PFN2/SEMA4A/SSH3/TMOD1/TRPV4/WHAMMP3/WNT5A/PDXP/VIL1/HIP1R	18
GO:0003073	GO:0003073	regulation of systemic arterial blood pressure	7/487	95/18866	0.0115057	0.267383	0.243015	ARHGAP42/CES1/KCNK6/NOS3/NOX1/OXTR/SLC2A5	7
GO:0045599	GO:0045599	negative regulation of fat cell differentiation	5/487	53/18866	0.0116481	0.26778	0.243376	BBS12/FOXO1/RORA/TRPV4/WNT5A	5
GO:0045668	GO:0045668	negative regulation of osteoblast differentiation	5/487	53/18866	0.0116481	0.26778	0.243376	LRP5/SKI/SMAD6/RANBP3L/RORB	5
GO:0045598	GO:0045598	regulation of fat cell differentiation	9/487	143/18866	0.0120167	0.273007	0.248127	ALOX5/BBS12/FOXO1/LRP5/RORA/TRPV4/WNT5A/ZBTB16/FNDC5	9
GO:0051546	GO:0051546	keratinocyte migration	3/487	19/18866	0.0121775	0.273007	0.248127	EPB41L4B/HBEGF/MAPRE2	3
GO:0032633	GO:0032633	interleukin-4 production	4/487	35/18866	0.0121947	0.273007	0.248127	IL20RB/IRF4/RARA/PRKCZ	4
GO:0042462	GO:0042462	eye photoreceptor cell development	4/487	35/18866	0.0121947	0.273007	0.248127	NRL/THY1/NTRK2/RORB	4
GO:0070306	GO:0070306	lens fiber cell differentiation	4/487	35/18866	0.0121947	0.273007	0.248127	SPRED3/TMOD1/FGF2/SLC7A11	4
GO:0002700	GO:0002700	regulation of production of molecular mediator of immune response	9/487	144/18866	0.0125354	0.279175	0.253733	APOA1/IL27RA/RSAD2/SPINK5/SPON2/TLR9/WNT5A/CD22/PRKCZ	9
GO:0098659	GO:0098659	inorganic cation import across plasma membrane	7/487	97/18866	0.0128068	0.282278	0.256553	FXYD2/KCNJ5/KCNK5/TRPV4/CALCR/KCNJ12/SLC39A12	7
GO:0099587	GO:0099587	inorganic ion import across plasma membrane	7/487	97/18866	0.0128068	0.282278	0.256553	FXYD2/KCNJ5/KCNK5/TRPV4/CALCR/KCNJ12/SLC39A12	7
GO:0003230	GO:0003230	cardiac atrium development	4/487	36/18866	0.0134457	0.289566	0.263177	ACVR1/WNT5A/SHOX2/WNT11	4
GO:0006007	GO:0006007	glucose catabolic process	4/487	36/18866	0.0134457	0.289566	0.263177	ALDOC/ENO2/HK2/LRP5	4
GO:0010771	GO:0010771	negative regulation of cell morphogenesis involved in differentiation	7/487	98/18866	0.0134956	0.289566	0.263177	ACTN4/CDK5R1/SEMA4A/WNT5A/YWHAH/NGFR/THY1	7
GO:0014020	GO:0014020	primary neural tube formation	7/487	98/18866	0.0134956	0.289566	0.263177	FZD1/RARA/SKI/WNT5A/ALX1/DLC1/VANGL2	7
GO:0051302	GO:0051302	regulation of cell division	10/487	171/18866	0.0135266	0.289566	0.263177	IL1A/KIF13A/PPBP/PRDM15/RAB11FIP4/TAL1/FGF2/PDXP/E2F8/PDGFD	10
GO:2000649	GO:2000649	regulation of sodium ion transmembrane transporter activity	5/487	55/18866	0.0135438	0.289566	0.263177	ACTN4/FXYD2/STK39/YWHAH/FXYD7	5
GO:0019935	GO:0019935	cyclic-nucleotide-mediated signaling	12/487	224/18866	0.0138266	0.294143	0.267337	ADGRG6/GPR161/LPAR1/NPR2/PTGIR/ADCY1/CALCR/GPR12/ADCY8/ADGRE1/CNR2/RXFP1	12
GO:0086014	GO:0086014	atrial cardiac muscle cell action potential	3/487	20/18866	0.0140566	0.294637	0.267785	KCNJ5/NUP155/GJC1	3
GO:0086026	GO:0086026	atrial cardiac muscle cell to AV node cell signaling	3/487	20/18866	0.0140566	0.294637	0.267785	KCNJ5/NUP155/GJC1	3
GO:0086066	GO:0086066	atrial cardiac muscle cell to AV node cell communication	3/487	20/18866	0.0140566	0.294637	0.267785	KCNJ5/NUP155/GJC1	3
GO:0150076	GO:0150076	neuroinflammatory response	6/487	77/18866	0.014545	0.299149	0.271886	CD200R1/CNTF/ITGAM/ADCY1/FPR2/ADCY8	6
GO:0019933	GO:0019933	cAMP-mediated signaling	11/487	199/18866	0.0145604	0.299149	0.271886	ADGRG6/GPR161/LPAR1/PTGIR/ADCY1/CALCR/GPR12/ADCY8/ADGRE1/CNR2/RXFP1	11
GO:0019320	GO:0019320	hexose catabolic process	5/487	56/18866	0.0145652	0.299149	0.271886	ALDOC/ENO2/FUT8/HK2/LRP5	5
GO:0050804	GO:0050804	modulation of chemical synaptic transmission	20/487	454/18866	0.0147154	0.299149	0.271886	ARC/BCR/KCNMB4/OXTR/PFN2/PLCB4/RARA/SYBU/SYN3/YWHAH/ADCY1/SYT9/ADCY8/CACNG5/CNR2/LRRC4C/NTRK2/PRKCZ/RAB26/SLC7A11	20
GO:0043243	GO:0043243	positive regulation of protein-containing complex disassembly	4/487	37/18866	0.0147755	0.299149	0.271886	NES/TRPV4/PDXP/VIL1	4
GO:0062208	GO:0062208	positive regulation of pattern recognition receptor signaling pathway	4/487	37/18866	0.0147755	0.299149	0.271886	RSAD2/TLR1/TLR9/TREML4	4
GO:0045807	GO:0045807	positive regulation of endocytosis	7/487	100/18866	0.0149521	0.299149	0.271886	ACTN4/NCKAP1L/WNT5A/APLN/CLIP3/HIP1R/SFRP4	7
GO:0099177	GO:0099177	regulation of trans-synaptic signaling	20/487	455/18866	0.0150362	0.299149	0.271886	ARC/BCR/KCNMB4/OXTR/PFN2/PLCB4/RARA/SYBU/SYN3/YWHAH/ADCY1/SYT9/ADCY8/CACNG5/CNR2/LRRC4C/NTRK2/PRKCZ/RAB26/SLC7A11	20
GO:0001736	GO:0001736	establishment of planar polarity	8/487	124/18866	0.0151699	0.299149	0.271886	FZD1/IFT20/PSMD11/PSMD13/WNT5A/VANGL2/WNT11/ZNRF3	8
GO:0006721	GO:0006721	terpenoid metabolic process	8/487	124/18866	0.0151699	0.299149	0.271886	ALDH3A2/APOA1/CRABP2/CYP2E1/CYP2S1/CYP3A4/RBP1/APOM	8
GO:0007164	GO:0007164	establishment of tissue polarity	8/487	124/18866	0.0151699	0.299149	0.271886	FZD1/IFT20/PSMD11/PSMD13/WNT5A/VANGL2/WNT11/ZNRF3	8
GO:0010769	GO:0010769	regulation of cell morphogenesis involved in differentiation	15/487	310/18866	0.0152035	0.299149	0.271886	ACTN4/APOA1/ARC/CDH4/CDK5R1/CRABP2/SEMA4A/WNT5A/YWHAH/CHODL/NGFR/SHOX2/THY1/LRRC4C/NTRK2	15
GO:0006874	GO:0006874	cellular calcium ion homeostasis	20/487	456/18866	0.0153625	0.299149	0.271886	ACKR3/FPR3/GPR35/LPAR1/MCOLN2/OXTR/P2RY10/PTGIR/TGM2/TRPV4/WNT5A/CALCR/F2/FGF2/FPR2/GPR12/THY1/ADCY8/PROK2/TMEM178A	20
GO:0042493	GO:0042493	response to drug	18/487	397/18866	0.0154089	0.299149	0.271886	AMELX/APOA1/CDK9/CYP2E1/CYP2S1/CYP3A4/FBP1/FZD1/GGH/MAP2K6/NCKAP1L/OXTR/RAD54L/SMPD1/SRP68/ADCY1/CD69/NNMT	18
GO:0051057	GO:0051057	positive regulation of small GTPase mediated signal transduction	6/487	78/18866	0.0154248	0.299149	0.271886	APOA1/CDON/GPR35/LPAR1/MAPRE2/P2RY10	6
GO:0002090	GO:0002090	regulation of receptor internalization	5/487	57/18866	0.015637	0.299149	0.271886	ARC/ATXN2/ITGB3/APLN/SFRP4	5
GO:0030838	GO:0030838	positive regulation of actin filament polymerization	7/487	101/18866	0.0157208	0.299149	0.271886	ALOX15/MLST8/NCKAP1L/PFN2/WHAMMP3/VIL1/HIP1R	7
GO:0060191	GO:0060191	regulation of lipase activity	7/487	101/18866	0.0157208	0.299149	0.271886	APOA1/LPAR1/PLIN5/FGF2/NMUR1/NTRK2/PRKCZ	7
GO:0001838	GO:0001838	embryonic epithelial tube formation	8/487	125/18866	0.0158547	0.299149	0.271886	FZD1/RARA/SKI/WNT5A/ALX1/DLC1/VANGL2/SOX8	8
GO:0035148	GO:0035148	tube formation	9/487	150/18866	0.016005	0.299149	0.271886	FZD1/RARA/SKI/TGM2/WNT5A/ALX1/DLC1/VANGL2/SOX8	9
GO:0032616	GO:0032616	interleukin-13 production	3/487	21/18866	0.0160908	0.299149	0.271886	IRF4/RARA/PRKCZ	3
GO:0035357	GO:0035357	peroxisome proliferator activated receptor signaling pathway	3/487	21/18866	0.0160908	0.299149	0.271886	ACTN4/ALOX15/PLIN5	3
GO:0043691	GO:0043691	reverse cholesterol transport	3/487	21/18866	0.0160908	0.299149	0.271886	APOA1/CES1/APOM	3
GO:0051797	GO:0051797	regulation of hair follicle development	3/487	21/18866	0.0160908	0.299149	0.271886	SPINK5/WNT5A/NGFR	3
GO:0060216	GO:0060216	definitive hemopoiesis	3/487	21/18866	0.0160908	0.299149	0.271886	BCR/TAL1/LYL1	3
GO:0140131	GO:0140131	positive regulation of lymphocyte chemotaxis	3/487	21/18866	0.0160908	0.299149	0.271886	STK39/TNFSF14/WNT5A	3
GO:0010634	GO:0010634	positive regulation of epithelial cell migration	10/487	176/18866	0.0162561	0.300913	0.27349	ANGPT4/EPB41L4B/HBEGF/ITGB3/MAPRE2/NOS3/WNT5A/FGF2/RHOJ/VIL1	10
GO:0032272	GO:0032272	negative regulation of protein polymerization	6/487	79/18866	0.0163408	0.301119	0.273677	PFN2/SSH3/TMOD1/CLIP3/VIL1/HIP1R	6
GO:0022600	GO:0022600	digestive system process	7/487	102/18866	0.0165172	0.301119	0.273677	APOA1/OXTR/SLC2A5/STK39/TLR9/VIL1/HIP1R	7
GO:0110020	GO:0110020	regulation of actomyosin structure organization	7/487	102/18866	0.0165172	0.301119	0.273677	APOA1/LPAR1/MYLK3/PFN2/RGCC/DLC1/WNT11	7
GO:0018210	GO:0018210	peptidyl-threonine modification	8/487	126/18866	0.0165616	0.301119	0.273677	ACVR1/CDK5R1/DYRK3/GALNT1/SPRED3/STK39/WNT5A/CADM4	8
GO:0008643	GO:0008643	carbohydrate transport	9/487	151/18866	0.0166454	0.301119	0.273677	CAPN10/HK2/PPBP/SLC2A3/SLC2A5/SLC2A9/CLIP3/MFSD2B/VIL1	9
GO:0010001	GO:0010001	glial cell differentiation	12/487	230/18866	0.0166992	0.301119	0.273677	ADGRG6/CNTF/IL6ST/LPAR1/NAB2/SKI/TAL1/F2/FPR2/PRX/NTRK2/SOX8	12
GO:0019369	GO:0019369	arachidonic acid metabolic process	5/487	58/18866	0.0167601	0.301119	0.273677	ALOX15/ALOX5/CYP2E1/CYP2S1/GPX1	5
GO:1901617	GO:1901617	organic hydroxy compound biosynthetic process	13/487	258/18866	0.016979	0.302992	0.275379	ALOX15/APOA1/CES1/CYP3A4/GCH1/IMPA2/PGP/PPIP5K1/WNT5A/FGF2/PDXP/PMEL/SLC7A11	13
GO:0010721	GO:0010721	negative regulation of cell development	16/487	343/18866	0.0170165	0.302992	0.275379	ACTN4/CDK5R1/CNTF/GPR173/LPAR1/NPR2/SEMA4A/SKI/TRPV4/WNT5A/YWHAH/ASCL2/F2/NGFR/THY1/SOX8	16
GO:0001649	GO:0001649	osteoblast differentiation	12/487	231/18866	0.0172186	0.302992	0.275379	ACVR1/AMELX/FZD1/IL6ST/LRP5/SKI/SMAD6/SHOX2/WNT11/RANBP3L/RORB/SOX8	12
GO:0032271	GO:0032271	regulation of protein polymerization	12/487	231/18866	0.0172186	0.302992	0.275379	ALOX15/CDK5R1/MLST8/NCKAP1L/PFN2/SSH3/TMOD1/WHAMMP3/CLIP3/SLC39A12/VIL1/HIP1R	12
GO:0051259	GO:0051259	protein complex oligomerization	12/487	231/18866	0.0172186	0.302992	0.275379	ARC/CALHM3/KCTD5/MAT1A/RRM1/GBP5/KCNJ12/KCNS2/KCTD15/ADCY8/KCNA1/KCNA10	12
GO:0051260	GO:0051260	protein homooligomerization	10/487	178/18866	0.0174551	0.304953	0.277162	ARC/KCTD5/MAT1A/GBP5/KCNJ12/KCNS2/KCTD15/ADCY8/KCNA1/KCNA10	10
GO:0021537	GO:0021537	telencephalon development	13/487	259/18866	0.0174727	0.304953	0.277162	ALK/CDK5R1/CDON/LPAR1/OXTR/RARA/SECISBP2/SKI/WNT5A/KCNA1/NTRK2/RFX4/SLC7A11	13
GO:0007190	GO:0007190	activation of adenylate cyclase activity	4/487	39/18866	0.017677	0.306598	0.278656	ADCY1/CAP2/ADCY8/RXFP1	4
GO:0048008	GO:0048008	platelet-derived growth factor receptor signaling pathway	5/487	59/18866	0.0179355	0.306598	0.278656	BCR/IFT20/PTGIR/HIP1R/PDGFD	5
GO:0051058	GO:0051058	negative regulation of small GTPase mediated signal transduction	5/487	59/18866	0.0179355	0.306598	0.278656	ARHGAP42/FBP1/LZTR1/ARHGAP24/DLC1	5
GO:0032231	GO:0032231	regulation of actin filament bundle assembly	7/487	104/18866	0.0181948	0.306598	0.278656	APOA1/LPAR1/PFN2/RGCC/DLC1/VIL1/WNT11	7
GO:0032649	GO:0032649	regulation of interferon-gamma production	7/487	104/18866	0.0181948	0.306598	0.278656	BCL3/CD274/IL20RB/IL27RA/RARA/TLR9/WNT5A	7
GO:0009190	GO:0009190	cyclic nucleotide biosynthetic process	3/487	22/18866	0.0182814	0.306598	0.278656	NPR2/ADCY1/ADCY8	3
GO:0042438	GO:0042438	melanin biosynthetic process	3/487	22/18866	0.0182814	0.306598	0.278656	WNT5A/PMEL/SLC7A11	3
GO:0045663	GO:0045663	positive regulation of myoblast differentiation	3/487	22/18866	0.0182814	0.306598	0.278656	CDON/TNFSF14/RANBP3L	3
GO:0052652	GO:0052652	cyclic purine nucleotide metabolic process	3/487	22/18866	0.0182814	0.306598	0.278656	NPR2/ADCY1/ADCY8	3
GO:0019915	GO:0019915	lipid storage	6/487	81/18866	0.018284	0.306598	0.278656	APOA1/CDS2/CES1/CRY1/ITGB3/PLIN5	6
GO:0032970	GO:0032970	regulation of actin filament-based process	18/487	405/18866	0.0184647	0.307971	0.279905	ALOX15/APOA1/CDK5R1/LPAR1/MLST8/MYLK3/NCKAP1L/PFN2/RGCC/SSH3/TMOD1/WHAMMP3/DLC1/PDXP/VANGL2/VIL1/WNT11/HIP1R	18
GO:0061351	GO:0061351	neural precursor cell proliferation	9/487	154/18866	0.0186794	0.307971	0.279905	CDON/FOXO1/IFT20/NES/RORA/RRM1/WNT5A/MELK/KCNA1	9
GO:1902105	GO:1902105	regulation of leukocyte differentiation	14/487	290/18866	0.0189474	0.307971	0.279905	DROSHA/HMGB3/IL1A/IL7R/IRF4/NCKAP1L/RARA/SPINK5/TAL1/TLR9/VNN1/ZBTB16/PRKCZ/TMEM178A	14
GO:0061448	GO:0061448	connective tissue development	13/487	262/18866	0.0190194	0.307971	0.279905	AMELX/CHADL/LRP5/RARA/TRPV4/WNT5A/FGF2/SHOX2/TNMD/WNT11/ZBTB16/PDGFD/SOX8	13
GO:0045621	GO:0045621	positive regulation of lymphocyte differentiation	7/487	105/18866	0.019077	0.307971	0.279905	IL1A/IL7R/NCKAP1L/RARA/VNN1/ZBTB16/PRKCZ	7
GO:0048259	GO:0048259	regulation of receptor-mediated endocytosis	7/487	105/18866	0.019077	0.307971	0.279905	ARC/ATXN2/BMP2K/ITGB3/APLN/HIP1R/SFRP4	7
GO:0032653	GO:0032653	regulation of interleukin-10 production	5/487	60/18866	0.0191641	0.307971	0.279905	CD274/IL20RB/IRF4/TLR9/PRKCZ	5
GO:0097755	GO:0097755	positive regulation of blood vessel diameter	5/487	60/18866	0.0191641	0.307971	0.279905	ARHGAP42/GCH1/GPX1/NOS3/APLN	5
GO:0001990	GO:0001990	regulation of systemic arterial blood pressure by hormone	4/487	40/18866	0.0192514	0.307971	0.279905	CES1/NOS3/NOX1/OXTR	4
GO:0009187	GO:0009187	cyclic nucleotide metabolic process	4/487	40/18866	0.0192514	0.307971	0.279905	NPR2/RORA/ADCY1/ADCY8	4
GO:0040036	GO:0040036	regulation of fibroblast growth factor receptor signaling pathway	4/487	40/18866	0.0192514	0.307971	0.279905	WNT5A/APLN/FGF2/NGFR	4
GO:1902895	GO:1902895	positive regulation of pri-miRNA transcription by RNA polymerase II	4/487	40/18866	0.0192514	0.307971	0.279905	SMAD6/APLN/FGF2/NGFR	4
GO:0048736	GO:0048736	appendage development	10/487	181/18866	0.0193742	0.307971	0.279905	CRABP2/LRP5/RARA/SKI/WNT5A/ALX1/SHOX2/ZBTB16/ZNRF3/SLC7A11	10
GO:0060173	GO:0060173	limb development	10/487	181/18866	0.0193742	0.307971	0.279905	CRABP2/LRP5/RARA/SKI/WNT5A/ALX1/SHOX2/ZBTB16/ZNRF3/SLC7A11	10
GO:0001841	GO:0001841	neural tube formation	7/487	106/18866	0.0199887	0.316562	0.287713	FZD1/RARA/SKI/WNT5A/ALX1/DLC1/VANGL2	7
GO:0048708	GO:0048708	astrocyte differentiation	6/487	83/18866	0.0203797	0.319031	0.289957	CNTF/IL6ST/TAL1/F2/FPR2/SOX8	6
GO:0003231	GO:0003231	cardiac ventricle development	8/487	131/18866	0.02044	0.319031	0.289957	ACVR1/FZD1/HECTD1/NOS3/SMAD6/WNT5A/VANGL2/WNT11	8
GO:0003170	GO:0003170	heart valve development	5/487	61/18866	0.0204467	0.319031	0.289957	ACVR1/HECTD1/NOS3/SMAD6/SHOX2	5
GO:0003283	GO:0003283	atrial septum development	3/487	23/18866	0.0206291	0.319031	0.289957	ACVR1/WNT5A/WNT11	3
GO:0006582	GO:0006582	melanin metabolic process	3/487	23/18866	0.0206291	0.319031	0.289957	WNT5A/PMEL/SLC7A11	3
GO:2000050	GO:2000050	regulation of non-canonical Wnt signaling pathway	3/487	23/18866	0.0206291	0.319031	0.289957	WNT5A/ZNRF3/SFRP4	3
GO:0032412	GO:0032412	regulation of ion transmembrane transporter activity	13/487	265/18866	0.0206669	0.319031	0.289957	ACTN4/ARC/FXYD2/GPR35/STK39/TLR9/YWHAH/ANO9/FXYD7/KCNS2/CACNG5/KCNA1/RGS9	13
GO:0051017	GO:0051017	actin filament bundle assembly	9/487	157/18866	0.020888	0.320783	0.291549	ACTN4/APOA1/LPAR1/PFN2/RGCC/DLC1/PDXP/VIL1/WNT11	9
GO:0030330	GO:0030330	DNA damage response, signal transduction by p53 class mediator	7/487	107/18866	0.0209304	0.320783	0.291549	BCL3/DYRK3/PLAGL1/PYHIN1/RGCC/SPRED3/E2F8	7
GO:0051056	GO:0051056	regulation of small GTPase mediated signal transduction	15/487	323/18866	0.021168	0.32296	0.293528	APOA1/ARHGAP42/BCR/CDON/DEPDC7/FBP1/GPR35/LPAR1/LZTR1/MAPRE2/P2RY10/ARHGAP24/CADM4/DLC1/RHOJ	15
GO:0001936	GO:0001936	regulation of endothelial cell proliferation	10/487	184/18866	0.0214437	0.32296	0.293528	ALOX5/CDH13/ITGB3/LRG1/RGCC/WNT5A/APLN/FGF2/NGFR/TNMD	10
GO:0030279	GO:0030279	negative regulation of ossification	6/487	84/18866	0.0214862	0.32296	0.293528	AHSG/LRP5/SKI/SMAD6/RANBP3L/RORB	6
GO:0050886	GO:0050886	endocrine process	6/487	84/18866	0.0214862	0.32296	0.293528	CES1/CRY1/NOS3/NOX1/OXTR/APLN	6
GO:0050768	GO:0050768	negative regulation of neurogenesis	14/487	295/18866	0.0215836	0.32296	0.293528	CDK5R1/CNTF/GPR173/LPAR1/SEMA4A/SKI/TRPV4/WNT5A/YWHAH/ASCL2/F2/NGFR/THY1/SOX8	14
GO:0050729	GO:0050729	positive regulation of inflammatory response	9/487	158/18866	0.0216643	0.32296	0.293528	IL17RC/IL6ST/MAPK13/TGM2/TLR9/TRPV4/WNT5A/GBP5/ZBP1	9
GO:0010518	GO:0010518	positive regulation of phospholipase activity	5/487	62/18866	0.0217842	0.32296	0.293528	LPAR1/FGF2/NMUR1/NTRK2/PRKCZ	5
GO:0034113	GO:0034113	heterotypic cell-cell adhesion	5/487	62/18866	0.0217842	0.32296	0.293528	ALOX15/APOA1/CD200R1/ITGB3/THY1	5
GO:0060071	GO:0060071	Wnt signaling pathway, planar cell polarity pathway	7/487	108/18866	0.0219025	0.32296	0.293528	FZD1/PSMD11/PSMD13/WNT5A/VANGL2/WNT11/ZNRF3	7
GO:0072175	GO:0072175	epithelial tube formation	8/487	133/18866	0.0221585	0.32296	0.293528	FZD1/RARA/SKI/WNT5A/ALX1/DLC1/VANGL2/SOX8	8
GO:0002685	GO:0002685	regulation of leukocyte migration	11/487	212/18866	0.022169	0.32296	0.293528	BCR/CD200R1/IL27RA/NCKAP1L/STK39/TNFSF14/TRPV4/WNT5A/FPR2/THY1/PDGFD	11
GO:0032675	GO:0032675	regulation of interleukin-6 production	9/487	159/18866	0.0224611	0.32296	0.293528	CD200R1/IL1A/MAPK13/NCKAP1L/NOD1/SPON2/TLR1/TLR9/WNT5A	9
GO:0050777	GO:0050777	negative regulation of immune response	9/487	159/18866	0.0224611	0.32296	0.293528	ALOX15/AMBP/APOA1/BCR/GPX1/IL20RB/IL27RA/IL7R/SPINK5	9
GO:0031110	GO:0031110	regulation of microtubule polymerization or depolymerization	6/487	85/18866	0.0226327	0.32296	0.293528	CDK5R1/MAPRE2/SKA2/TRPV4/CLIP3/SLC39A12	6
GO:0110110	GO:0110110	positive regulation of animal organ morphogenesis	6/487	85/18866	0.0226327	0.32296	0.293528	ACVR1/AMELX/WNT5A/NGFR/WNT11/SOX8	6
GO:0044058	GO:0044058	regulation of digestive system process	4/487	42/18866	0.0226532	0.32296	0.293528	APOA1/OXTR/STK39/HIP1R	4
GO:0018958	GO:0018958	phenol-containing compound metabolic process	7/487	109/18866	0.0229054	0.32296	0.293528	CYP2E1/GCH1/ITGAM/WNT5A/PMEL/SLC16A10/SLC7A11	7
GO:0090630	GO:0090630	activation of GTPase activity	7/487	109/18866	0.0229054	0.32296	0.293528	ADPRH/ARHGAP42/BCR/TBC1D30/WNT5A/ARHGAP24/TBC1D8B	7
GO:0031348	GO:0031348	negative regulation of defense response	13/487	269/18866	0.023027	0.32296	0.293528	ALOX5/APOA1/BCR/CD200R1/GPX1/IL20RB/LRFN5/RORA/SPINK5/F2/FPR2/IL1R2/CNR2	13
GO:0010640	GO:0010640	regulation of platelet-derived growth factor receptor signaling pathway	3/487	24/18866	0.0231345	0.32296	0.293528	IFT20/PTGIR/HIP1R	3
GO:0042738	GO:0042738	exogenous drug catabolic process	3/487	24/18866	0.0231345	0.32296	0.293528	CYP2E1/CYP2S1/CYP3A4	3
GO:0044550	GO:0044550	secondary metabolite biosynthetic process	3/487	24/18866	0.0231345	0.32296	0.293528	WNT5A/PMEL/SLC7A11	3
GO:0062009	GO:0062009	secondary palate development	3/487	24/18866	0.0231345	0.32296	0.293528	FZD1/WNT5A/WNT11	3
GO:0032613	GO:0032613	interleukin-10 production	5/487	63/18866	0.0231772	0.32296	0.293528	CD274/IL20RB/IRF4/TLR9/PRKCZ	5
GO:2000514	GO:2000514	regulation of CD4-positive, alpha-beta T cell activation	5/487	63/18866	0.0231772	0.32296	0.293528	CD274/IRF4/NCKAP1L/RARA/PRKCZ	5
GO:0007193	GO:0007193	adenylate cyclase-inhibiting G protein-coupled receptor signaling pathway	6/487	86/18866	0.0238195	0.32296	0.293528	GNAZ/LPAR1/ADCY1/FPR2/OXER1/ADCY8	6
GO:0050772	GO:0050772	positive regulation of axonogenesis	6/487	86/18866	0.0238195	0.32296	0.293528	CDH4/CRABP2/CHODL/NGFR/SHOX2/NTRK2	6
GO:0006898	GO:0006898	receptor-mediated endocytosis	15/487	328/18866	0.0238815	0.32296	0.293528	ACKR3/AMBP/APOA1/ARC/ATXN2/BMP2K/FCHO2/ITGAM/ITGB3/APLN/ARR3/FPR2/CACNG5/HIP1R/SFRP4	15
GO:0090175	GO:0090175	regulation of establishment of planar polarity	7/487	110/18866	0.0239396	0.32296	0.293528	FZD1/PSMD11/PSMD13/WNT5A/VANGL2/WNT11/ZNRF3	7
GO:1904659	GO:1904659	glucose transmembrane transport	7/487	110/18866	0.0239396	0.32296	0.293528	CAPN10/HK2/PPBP/SLC2A3/SLC2A5/SLC2A9/CLIP3	7
GO:0061572	GO:0061572	actin filament bundle organization	9/487	161/18866	0.0241174	0.32296	0.293528	ACTN4/APOA1/LPAR1/PFN2/RGCC/DLC1/PDXP/VIL1/WNT11	9
GO:1903037	GO:1903037	regulation of leukocyte cell-cell adhesion	15/487	329/18866	0.0244542	0.32296	0.293528	ALOX5/CD274/IL1A/IL20RB/IL27RA/IL6ST/IL7R/NCKAP1L/RARA/TMIGD2/TNFSF14/VNN1/THY1/ZBTB16/PRKCZ	15
GO:0008631	GO:0008631	intrinsic apoptotic signaling pathway in response to oxidative stress	4/487	43/18866	0.0244826	0.32296	0.293528	GPX1/NOX1/VNN1/MELK	4
GO:0051258	GO:0051258	protein polymerization	14/487	300/18866	0.0244865	0.32296	0.293528	ALOX15/CDK5R1/MLST8/NCKAP1L/PFN2/SSH3/TMOD1/TRPV4/TUBG1/WHAMMP3/CLIP3/SLC39A12/VIL1/HIP1R	14
GO:0030166	GO:0030166	proteoglycan biosynthetic process	5/487	64/18866	0.0246265	0.32296	0.293528	CANT1/CHPF/HS3ST5/HS6ST2/VANGL2	5
GO:0046637	GO:0046637	regulation of alpha-beta T cell differentiation	5/487	64/18866	0.0246265	0.32296	0.293528	IRF4/NCKAP1L/RARA/ZBTB16/PRKCZ	5
GO:2000401	GO:2000401	regulation of lymphocyte migration	5/487	64/18866	0.0246265	0.32296	0.293528	CD200R1/IL27RA/STK39/TNFSF14/WNT5A	5
GO:0019827	GO:0019827	stem cell population maintenance	9/487	162/18866	0.0249773	0.32296	0.293528	DPPA4/FOXO1/LRP5/POLR2H/SKI/TAL1/ASCL2/FGF2/VANGL2	9
GO:0010632	GO:0010632	regulation of epithelial cell migration	14/487	301/18866	0.0251003	0.32296	0.293528	ANGPT4/EPB41L4B/HBEGF/ITGB3/MAPRE2/NOS3/PFN2/PTPRR/RGCC/SEMA4A/WNT5A/FGF2/RHOJ/VIL1	14
GO:0007369	GO:0007369	gastrulation	10/487	189/18866	0.0252434	0.32296	0.293528	ACVR1/APOA1/ITGB3/LRP5/TAL1/WNT5A/APLN/COL7A1/VANGL2/WNT11	10
GO:0042692	GO:0042692	muscle cell differentiation	17/487	390/18866	0.0254719	0.32296	0.293528	ACVR1/CDK9/CDON/FBXO40/GPX1/IFT20/KRT8/MYLK3/RARA/RBM38/RBPMS2/RORA/SKI/TMOD1/TNFSF14/ERVFRD-1/SHOX2	17
GO:0002053	GO:0002053	positive regulation of mesenchymal cell proliferation	3/487	25/18866	0.0257973	0.32296	0.293528	LRP5/WNT5A/SHOX2	3
GO:0034162	GO:0034162	toll-like receptor 9 signaling pathway	3/487	25/18866	0.0257973	0.32296	0.293528	RSAD2/TLR9/IRAK4	3
GO:0031214	GO:0031214	biomineral tissue development	9/487	163/18866	0.0258588	0.32296	0.293528	ACVR1/AHSG/ALOX15/ALOX5/AMELX/BMP2K/FOXO1/NOS3/WNT11	9
GO:0110148	GO:0110148	biomineralization	9/487	163/18866	0.0258588	0.32296	0.293528	ACVR1/AHSG/ALOX15/ALOX5/AMELX/BMP2K/FOXO1/NOS3/WNT11	9
GO:0032273	GO:0032273	positive regulation of protein polymerization	8/487	137/18866	0.0258968	0.32296	0.293528	ALOX15/CDK5R1/MLST8/NCKAP1L/PFN2/WHAMMP3/VIL1/HIP1R	8
GO:0042552	GO:0042552	myelination	8/487	137/18866	0.0258968	0.32296	0.293528	ADGRG6/LPAR1/MALL/NAB2/RARA/SKI/PRX/NTRK2	8
GO:0008064	GO:0008064	regulation of actin polymerization or depolymerization	10/487	190/18866	0.0260578	0.32296	0.293528	ALOX15/MLST8/NCKAP1L/PFN2/SSH3/TMOD1/WHAMMP3/PDXP/VIL1/HIP1R	10
GO:0003129	GO:0003129	heart induction	2/487	10/18866	0.0260874	0.32296	0.293528	WNT5A/WNT11	2
GO:0003149	GO:0003149	membranous septum morphogenesis	2/487	10/18866	0.0260874	0.32296	0.293528	FZD1/VANGL2	2
GO:0003183	GO:0003183	mitral valve morphogenesis	2/487	10/18866	0.0260874	0.32296	0.293528	ACVR1/SMAD6	2
GO:0003307	GO:0003307	regulation of Wnt signaling pathway involved in heart development	2/487	10/18866	0.0260874	0.32296	0.293528	WNT5A/WNT11	2
GO:0006171	GO:0006171	cAMP biosynthetic process	2/487	10/18866	0.0260874	0.32296	0.293528	ADCY1/ADCY8	2
GO:0006971	GO:0006971	hypotonic response	2/487	10/18866	0.0260874	0.32296	0.293528	STK39/TRPV4	2
GO:0030388	GO:0030388	fructose 1,6-bisphosphate metabolic process	2/487	10/18866	0.0260874	0.32296	0.293528	ALDOC/FBP1	2
GO:0032926	GO:0032926	negative regulation of activin receptor signaling pathway	2/487	10/18866	0.0260874	0.32296	0.293528	ACVR1/SKI	2
GO:0034154	GO:0034154	toll-like receptor 7 signaling pathway	2/487	10/18866	0.0260874	0.32296	0.293528	RSAD2/TREML4	2
GO:0034163	GO:0034163	regulation of toll-like receptor 9 signaling pathway	2/487	10/18866	0.0260874	0.32296	0.293528	RSAD2/TLR9	2
GO:0045647	GO:0045647	negative regulation of erythrocyte differentiation	2/487	10/18866	0.0260874	0.32296	0.293528	NCAPG2/TAL1	2
GO:0048340	GO:0048340	paraxial mesoderm morphogenesis	2/487	10/18866	0.0260874	0.32296	0.293528	WNT5A/WNT11	2
GO:0048570	GO:0048570	notochord morphogenesis	2/487	10/18866	0.0260874	0.32296	0.293528	WNT5A/WNT11	2
GO:0071649	GO:0071649	regulation of chemokine (C-C motif) ligand 5 production	2/487	10/18866	0.0260874	0.32296	0.293528	MCOLN2/TRPV4	2
GO:0071670	GO:0071670	smooth muscle cell chemotaxis	2/487	10/18866	0.0260874	0.32296	0.293528	LPAR1/PDGFD	2
GO:0090037	GO:0090037	positive regulation of protein kinase C signaling	2/487	10/18866	0.0260874	0.32296	0.293528	WNT5A/WNT11	2
GO:2000659	GO:2000659	regulation of interleukin-1-mediated signaling pathway	2/487	10/18866	0.0260874	0.32296	0.293528	IL1R2/ZBP1	2
GO:0030837	GO:0030837	negative regulation of actin filament polymerization	5/487	65/18866	0.0261329	0.32296	0.293528	PFN2/SSH3/TMOD1/VIL1/HIP1R	5
GO:1902305	GO:1902305	regulation of sodium ion transmembrane transport	5/487	65/18866	0.0261329	0.32296	0.293528	ACTN4/FXYD2/STK39/YWHAH/FXYD7	5
GO:0002028	GO:0002028	regulation of sodium ion transport	6/487	88/18866	0.0263168	0.32344	0.293964	ACTN4/FXYD2/NOS3/STK39/YWHAH/FXYD7	6
GO:0010463	GO:0010463	mesenchymal cell proliferation	4/487	44/18866	0.0263986	0.32344	0.293964	LRP5/WNT5A/SHOX2/WNT11	4
GO:0045197	GO:0045197	establishment or maintenance of epithelial cell apical/basal polarity	4/487	44/18866	0.0263986	0.32344	0.293964	IFT20/WNT5A/VANGL2/WNT11	4
GO:0046165	GO:0046165	alcohol biosynthetic process	9/487	164/18866	0.0267621	0.325532	0.295866	APOA1/CES1/CYP3A4/GCH1/IMPA2/PGP/PPIP5K1/FGF2/PDXP	9
GO:0098727	GO:0098727	maintenance of cell number	9/487	164/18866	0.0267621	0.325532	0.295866	DPPA4/FOXO1/LRP5/POLR2H/SKI/TAL1/ASCL2/FGF2/VANGL2	9
GO:0030832	GO:0030832	regulation of actin filament length	10/487	191/18866	0.0268909	0.325532	0.295866	ALOX15/MLST8/NCKAP1L/PFN2/SSH3/TMOD1/WHAMMP3/PDXP/VIL1/HIP1R	10
GO:0001676	GO:0001676	long-chain fatty acid metabolic process	7/487	113/18866	0.0272339	0.325532	0.295866	ACAA1/ALOX15/ALOX5/CYP2E1/CYP2S1/CYP3A4/GPX1	7
GO:0022898	GO:0022898	regulation of transmembrane transporter activity	13/487	276/18866	0.0276308	0.325532	0.295866	ACTN4/ARC/FXYD2/GPR35/STK39/TLR9/YWHAH/ANO9/FXYD7/KCNS2/CACNG5/KCNA1/RGS9	13
GO:0032768	GO:0032768	regulation of monooxygenase activity	5/487	66/18866	0.0276968	0.325532	0.295866	GCH1/IL1A/NOD1/NOS3/CNR2	5
GO:0046365	GO:0046365	monosaccharide catabolic process	5/487	66/18866	0.0276968	0.325532	0.295866	ALDOC/ENO2/FUT8/HK2/LRP5	5
GO:0007272	GO:0007272	ensheathment of neurons	8/487	139/18866	0.0279217	0.325532	0.295866	ADGRG6/LPAR1/MALL/NAB2/RARA/SKI/PRX/NTRK2	8
GO:0008366	GO:0008366	axon ensheathment	8/487	139/18866	0.0279217	0.325532	0.295866	ADGRG6/LPAR1/MALL/NAB2/RARA/SKI/PRX/NTRK2	8
GO:0008645	GO:0008645	hexose transmembrane transport	7/487	114/18866	0.0283971	0.325532	0.295866	CAPN10/HK2/PPBP/SLC2A3/SLC2A5/SLC2A9/CLIP3	7
GO:0016101	GO:0016101	diterpenoid metabolic process	7/487	114/18866	0.0283971	0.325532	0.295866	ALDH3A2/APOA1/CRABP2/CYP2S1/CYP3A4/RBP1/APOM	7
GO:0046189	GO:0046189	phenol-containing compound biosynthetic process	4/487	45/18866	0.0284022	0.325532	0.295866	GCH1/WNT5A/PMEL/SLC7A11	4
GO:0019932	GO:0019932	second-messenger-mediated signaling	19/487	456/18866	0.0284169	0.325532	0.295866	ACKR3/ADGRG6/CDH13/GPR161/LPAR1/NOS3/NPR2/PTGIR/SLA2/ADCY1/CALCR/FPR2/GPR12/NMUR1/ADCY8/ADGRE1/CD22/CNR2/RXFP1	19
GO:0015012	GO:0015012	heparan sulfate proteoglycan biosynthetic process	3/487	26/18866	0.0286174	0.325532	0.295866	HS3ST5/HS6ST2/VANGL2	3
GO:0032967	GO:0032967	positive regulation of collagen biosynthetic process	3/487	26/18866	0.0286174	0.325532	0.295866	AMELX/RGCC/F2	3
GO:0034114	GO:0034114	regulation of heterotypic cell-cell adhesion	3/487	26/18866	0.0286174	0.325532	0.295866	ALOX15/APOA1/THY1	3
GO:0036315	GO:0036315	cellular response to sterol	3/487	26/18866	0.0286174	0.325532	0.295866	CES1/MLC1/RORA	3
GO:0042737	GO:0042737	drug catabolic process	3/487	26/18866	0.0286174	0.325532	0.295866	CYP2E1/CYP2S1/CYP3A4	3
GO:0008154	GO:0008154	actin polymerization or depolymerization	11/487	221/18866	0.0289217	0.325532	0.295866	ALOX15/MLST8/NCKAP1L/PFN2/SSH3/TMOD1/WHAMMP3/CAP2/PDXP/VIL1/HIP1R	11
GO:0042063	GO:0042063	gliogenesis	14/487	307/18866	0.029026	0.325532	0.295866	ADGRG6/CDK5R1/CNTF/IL6ST/LPAR1/NAB2/SKI/TAL1/ASCL2/F2/FPR2/PRX/NTRK2/SOX8	14
GO:0072678	GO:0072678	T cell migration	5/487	67/18866	0.029319	0.325532	0.295866	CD200R1/IL27RA/STK39/TNFSF14/WNT5A	5
GO:1900015	GO:1900015	regulation of cytokine production involved in inflammatory response	5/487	67/18866	0.029319	0.325532	0.295866	ALOX5/IL17RC/F2/GBP5/IL1R2	5
GO:0007586	GO:0007586	digestion	8/487	141/18866	0.0300537	0.325532	0.295866	APOA1/OXTR/SLC2A5/STK39/TLR9/MGAM/VIL1/HIP1R	8
GO:0006094	GO:0006094	gluconeogenesis	6/487	91/18866	0.0303788	0.325532	0.295866	ALDOC/CRY1/ENO2/FBP1/FOXO1/PGP	6
GO:0051492	GO:0051492	regulation of stress fiber assembly	6/487	91/18866	0.0303788	0.325532	0.295866	APOA1/LPAR1/PFN2/RGCC/DLC1/WNT11	6
GO:0050731	GO:0050731	positive regulation of peptidyl-tyrosine phosphorylation	10/487	195/18866	0.030414	0.325532	0.295866	ACVR1/ANGPT4/CNTF/HBEGF/IL6ST/ITGB3/MLST8/NCAPG2/TAL1/NTRK2	10
GO:0010863	GO:0010863	positive regulation of phospholipase C activity	4/487	46/18866	0.0304937	0.325532	0.295866	LPAR1/FGF2/NMUR1/NTRK2	4
GO:0050798	GO:0050798	activated T cell proliferation	4/487	46/18866	0.0304937	0.325532	0.295866	BTN3A1/CD274/IL27RA/TMIGD2	4
GO:0071772	GO:0071772	response to BMP	9/487	168/18866	0.0305983	0.325532	0.295866	ACVR1/FZD1/RBPMS2/SKI/SMAD6/WNT5A/FAM83G/TNMD/SFRP4	9
GO:0071773	GO:0071773	cellular response to BMP stimulus	9/487	168/18866	0.0305983	0.325532	0.295866	ACVR1/FZD1/RBPMS2/SKI/SMAD6/WNT5A/FAM83G/TNMD/SFRP4	9
GO:0015749	GO:0015749	monosaccharide transmembrane transport	7/487	116/18866	0.0308235	0.325532	0.295866	CAPN10/HK2/PPBP/SLC2A3/SLC2A5/SLC2A9/CLIP3	7
GO:0050766	GO:0050766	positive regulation of phagocytosis	5/487	68/18866	0.0309999	0.325532	0.295866	AHSG/APOA1/BCR/NCKAP1L/FPR2	5
GO:0090287	GO:0090287	regulation of cellular response to growth factor stimulus	14/487	310/18866	0.0311498	0.325532	0.295866	FZD1/ITGB3/LRG1/RBPMS2/SKI/SMAD6/SPRED3/WNT5A/APLN/CADM4/FGF2/NGFR/TNMD/SFRP4	14
GO:0002687	GO:0002687	positive regulation of leukocyte migration	8/487	142/18866	0.0311605	0.325532	0.295866	NCKAP1L/STK39/TNFSF14/TRPV4/WNT5A/FPR2/THY1/PDGFD	8
GO:0031333	GO:0031333	negative regulation of protein-containing complex assembly	8/487	142/18866	0.0311605	0.325532	0.295866	PFN2/SMAD6/SSH3/TMOD1/CLIP3/VIL1/HIP1R/PRKCZ	8
GO:0003139	GO:0003139	secondary heart field specification	2/487	11/18866	0.0313476	0.325532	0.295866	WNT5A/WNT11	2
GO:0003174	GO:0003174	mitral valve development	2/487	11/18866	0.0313476	0.325532	0.295866	ACVR1/SMAD6	2
GO:0005984	GO:0005984	disaccharide metabolic process	2/487	11/18866	0.0313476	0.325532	0.295866	FBP1/MGAM	2
GO:0006020	GO:0006020	inositol metabolic process	2/487	11/18866	0.0313476	0.325532	0.295866	IMPA2/PPIP5K1	2
GO:0032754	GO:0032754	positive regulation of interleukin-5 production	2/487	11/18866	0.0313476	0.325532	0.295866	RARA/PRKCZ	2
GO:0042482	GO:0042482	positive regulation of odontogenesis	2/487	11/18866	0.0313476	0.325532	0.295866	AMELX/NGFR	2
GO:0042670	GO:0042670	retinal cone cell differentiation	2/487	11/18866	0.0313476	0.325532	0.295866	THY1/RORB	2
GO:0043455	GO:0043455	regulation of secondary metabolic process	2/487	11/18866	0.0313476	0.325532	0.295866	WNT5A/SLC7A11	2
GO:0044848	GO:0044848	biological phase	2/487	11/18866	0.0313476	0.325532	0.295866	SPINK5/WNT5A	2
GO:0045628	GO:0045628	regulation of T-helper 2 cell differentiation	2/487	11/18866	0.0313476	0.325532	0.295866	RARA/PRKCZ	2
GO:0046549	GO:0046549	retinal cone cell development	2/487	11/18866	0.0313476	0.325532	0.295866	THY1/RORB	2
GO:0048021	GO:0048021	regulation of melanin biosynthetic process	2/487	11/18866	0.0313476	0.325532	0.295866	WNT5A/SLC7A11	2
GO:0061299	GO:0061299	retina vasculature morphogenesis in camera-type eye	2/487	11/18866	0.0313476	0.325532	0.295866	LRP5/RHOJ	2
GO:0070106	GO:0070106	interleukin-27-mediated signaling pathway	2/487	11/18866	0.0313476	0.325532	0.295866	IL27RA/IL6ST	2
GO:0070757	GO:0070757	interleukin-35-mediated signaling pathway	2/487	11/18866	0.0313476	0.325532	0.295866	IL27RA/IL6ST	2
GO:0071609	GO:0071609	chemokine (C-C motif) ligand 5 production	2/487	11/18866	0.0313476	0.325532	0.295866	MCOLN2/TRPV4	2
GO:0090269	GO:0090269	fibroblast growth factor production	2/487	11/18866	0.0313476	0.325532	0.295866	RGCC/WNT11	2
GO:0090270	GO:0090270	regulation of fibroblast growth factor production	2/487	11/18866	0.0313476	0.325532	0.295866	RGCC/WNT11	2
GO:1900376	GO:1900376	regulation of secondary metabolite biosynthetic process	2/487	11/18866	0.0313476	0.325532	0.295866	WNT5A/SLC7A11	2
GO:1904321	GO:1904321	response to forskolin	2/487	11/18866	0.0313476	0.325532	0.295866	ADCY1/ADCY8	2
GO:1904322	GO:1904322	cellular response to forskolin	2/487	11/18866	0.0313476	0.325532	0.295866	ADCY1/ADCY8	2
GO:2000551	GO:2000551	regulation of T-helper 2 cell cytokine production	2/487	11/18866	0.0313476	0.325532	0.295866	RSAD2/PRKCZ	2
GO:0001702	GO:0001702	gastrulation with mouth forming second	3/487	27/18866	0.031594	0.325532	0.295866	ACVR1/LRP5/WNT5A	3
GO:0006735	GO:0006735	NADH regeneration	3/487	27/18866	0.031594	0.325532	0.295866	ALDOC/ENO2/HK2	3
GO:0010714	GO:0010714	positive regulation of collagen metabolic process	3/487	27/18866	0.031594	0.325532	0.295866	AMELX/RGCC/F2	3
GO:0033081	GO:0033081	regulation of T cell differentiation in thymus	3/487	27/18866	0.031594	0.325532	0.295866	IL1A/IL7R/VNN1	3
GO:0061621	GO:0061621	canonical glycolysis	3/487	27/18866	0.031594	0.325532	0.295866	ALDOC/ENO2/HK2	3
GO:0061718	GO:0061718	glucose catabolic process to pyruvate	3/487	27/18866	0.031594	0.325532	0.295866	ALDOC/ENO2/HK2	3
GO:0099590	GO:0099590	neurotransmitter receptor internalization	3/487	27/18866	0.031594	0.325532	0.295866	ARC/ITGB3/CACNG5	3
GO:1901623	GO:1901623	regulation of lymphocyte chemotaxis	3/487	27/18866	0.031594	0.325532	0.295866	STK39/TNFSF14/WNT5A	3
GO:1902175	GO:1902175	regulation of oxidative stress-induced intrinsic apoptotic signaling pathway	3/487	27/18866	0.031594	0.325532	0.295866	GPX1/NOX1/VNN1	3
GO:0014902	GO:0014902	myotube differentiation	7/487	117/18866	0.0320874	0.328243	0.298329	CDON/GPX1/RBM38/SKI/TNFSF14/ERVFRD-1/SHOX2	7
GO:0018107	GO:0018107	peptidyl-threonine phosphorylation	7/487	117/18866	0.0320874	0.328243	0.298329	ACVR1/CDK5R1/DYRK3/SPRED3/STK39/WNT5A/CADM4	7
GO:0031109	GO:0031109	microtubule polymerization or depolymerization	7/487	117/18866	0.0320874	0.328243	0.298329	CDK5R1/MAPRE2/SKA2/TRPV4/TUBG1/CLIP3/SLC39A12	7
GO:0035296	GO:0035296	regulation of tube diameter	8/487	143/18866	0.0322949	0.328793	0.298829	ARHGAP42/GCH1/GPX1/HTR7/KCNMB4/NOS3/OXTR/APLN	8
GO:0097746	GO:0097746	regulation of blood vessel diameter	8/487	143/18866	0.0322949	0.328793	0.298829	ARHGAP42/GCH1/GPX1/HTR7/KCNMB4/NOS3/OXTR/APLN	8
GO:0032635	GO:0032635	interleukin-6 production	9/487	170/18866	0.0326534	0.330291	0.30019	CD200R1/IL1A/MAPK13/NCKAP1L/NOD1/SPON2/TLR1/TLR9/WNT5A	9
GO:0046638	GO:0046638	positive regulation of alpha-beta T cell differentiation	4/487	47/18866	0.0326737	0.330291	0.30019	NCKAP1L/RARA/ZBTB16/PRKCZ	4
GO:0050919	GO:0050919	negative chemotaxis	4/487	47/18866	0.0326737	0.330291	0.30019	APOA1/ITGB3/SEMA4A/WNT5A	4
GO:2000027	GO:2000027	regulation of animal organ morphogenesis	12/487	254/18866	0.0328182	0.330968	0.300806	ACVR1/AMELX/CNTF/FZD1/PSMD11/PSMD13/WNT5A/NGFR/VANGL2/WNT11/ZNRF3/SOX8	12
GO:0043112	GO:0043112	receptor metabolic process	10/487	198/18866	0.0332619	0.332705	0.302385	ACKR3/ARC/ATXN2/FUT8/ITGB3/APLN/ARR3/ZNRF3/CACNG5/SFRP4	10
GO:0030510	GO:0030510	regulation of BMP signaling pathway	6/487	93/18866	0.0333028	0.332705	0.302385	FZD1/RBPMS2/SKI/SMAD6/WNT5A/SFRP4	6
GO:0045765	GO:0045765	regulation of angiogenesis	17/487	403/18866	0.0333264	0.332705	0.302385	ALOX5/ANGPT4/GAB1/HK2/IL1A/LRG1/NOS3/RGCC/SEMA4A/SPINK5/TMIGD2/WNT5A/FGF2/NGFR/RHOJ/TNMD/PROK2	17
GO:0034219	GO:0034219	carbohydrate transmembrane transport	7/487	118/18866	0.0333854	0.332705	0.302385	CAPN10/HK2/PPBP/SLC2A3/SLC2A5/SLC2A9/CLIP3	7
GO:0006720	GO:0006720	isoprenoid metabolic process	8/487	144/18866	0.0334573	0.332705	0.302385	ALDH3A2/APOA1/CRABP2/CYP2E1/CYP2S1/CYP3A4/RBP1/APOM	8
GO:0035150	GO:0035150	regulation of tube size	8/487	144/18866	0.0334573	0.332705	0.302385	ARHGAP42/GCH1/GPX1/HTR7/KCNMB4/NOS3/OXTR/APLN	8
GO:0002534	GO:0002534	cytokine production involved in inflammatory response	5/487	70/18866	0.03454	0.335763	0.305164	ALOX5/IL17RC/F2/GBP5/IL1R2	5
GO:0050771	GO:0050771	negative regulation of axonogenesis	5/487	70/18866	0.03454	0.335763	0.305164	CDK5R1/SEMA4A/WNT5A/NGFR/THY1	5
GO:0001738	GO:0001738	morphogenesis of a polarized epithelium	8/487	145/18866	0.0346477	0.335763	0.305164	FZD1/IFT20/PSMD11/PSMD13/WNT5A/VANGL2/WNT11/ZNRF3	8
GO:0038127	GO:0038127	ERBB signaling pathway	8/487	145/18866	0.0346477	0.335763	0.305164	CDH13/GAB1/HBEGF/PTPRR/RHBDF1/GRB7/VIL1/HIP1R	8
GO:0010818	GO:0010818	T cell chemotaxis	3/487	28/18866	0.0347261	0.335763	0.305164	STK39/TNFSF14/WNT5A	3
GO:0061620	GO:0061620	glycolytic process through glucose-6-phosphate	3/487	28/18866	0.0347261	0.335763	0.305164	ALDOC/ENO2/HK2	3
GO:0019319	GO:0019319	hexose biosynthetic process	6/487	94/18866	0.0348307	0.335763	0.305164	ALDOC/CRY1/ENO2/FBP1/FOXO1/PGP	6
GO:0045778	GO:0045778	positive regulation of ossification	6/487	94/18866	0.0348307	0.335763	0.305164	ACVR1/ALOX5/IL6ST/LRP5/WNT5A/ZBTB16	6
GO:0002820	GO:0002820	negative regulation of adaptive immune response	4/487	48/18866	0.0349426	0.335763	0.305164	ALOX15/IL20RB/IL27RA/IL7R	4
GO:0035088	GO:0035088	establishment or maintenance of apical/basal cell polarity	4/487	48/18866	0.0349426	0.335763	0.305164	IFT20/WNT5A/VANGL2/WNT11	4
GO:0043370	GO:0043370	regulation of CD4-positive, alpha-beta T cell differentiation	4/487	48/18866	0.0349426	0.335763	0.305164	IRF4/NCKAP1L/RARA/PRKCZ	4
GO:0060324	GO:0060324	face development	4/487	48/18866	0.0349426	0.335763	0.305164	CRISPLD2/RARA/SKI/WNT5A	4
GO:0061245	GO:0061245	establishment or maintenance of bipolar cell polarity	4/487	48/18866	0.0349426	0.335763	0.305164	IFT20/WNT5A/VANGL2/WNT11	4
GO:1900274	GO:1900274	regulation of phospholipase C activity	4/487	48/18866	0.0349426	0.335763	0.305164	LPAR1/FGF2/NMUR1/NTRK2	4
GO:1990573	GO:1990573	potassium ion import across plasma membrane	4/487	48/18866	0.0349426	0.335763	0.305164	FXYD2/KCNJ5/KCNK5/KCNJ12	4
GO:0031032	GO:0031032	actomyosin structure organization	10/487	200/18866	0.0352613	0.337659	0.306887	APOA1/EPB41L4B/KRT8/LPAR1/MYLK3/PFN2/RGCC/TMOD1/DLC1/WNT11	10
GO:0051403	GO:0051403	stress-activated MAPK cascade	13/487	286/18866	0.0353296	0.337659	0.306887	AMBP/FOXO1/IKBKB/MAPK13/NOD1/NOX1/TLR9/TRPV4/WNT5A/IRAK4/KLHL31/SH3RF2/VANGL2	13
GO:0031334	GO:0031334	positive regulation of protein-containing complex assembly	12/487	257/18866	0.035422	0.337659	0.306887	ALOX15/CDK5R1/MLST8/MPP7/NCKAP1L/PFN2/TAL1/WHAMMP3/GBP5/VIL1/HIP1R/TRABD2A	12
GO:0033209	GO:0033209	tumor necrosis factor-mediated signaling pathway	9/487	173/18866	0.0359123	0.337659	0.306887	ACTN4/APOA1/IKBKB/KRT8/PSMD11/PSMD13/TNFRSF9/TNFSF14/CLIP3	9
GO:0050920	GO:0050920	regulation of chemotaxis	11/487	229/18866	0.0360646	0.337659	0.306887	CDH13/LPAR1/NCKAP1L/SEMA4A/STK39/TNFSF14/TRPV4/WNT5A/FGF2/FPR2/PDGFD	11
GO:0002221	GO:0002221	pattern recognition receptor signaling pathway	10/487	201/18866	0.0362918	0.337659	0.306887	IKBKB/IRF4/ITGAM/MAP2K6/NOD1/RSAD2/TLR1/TLR9/IRAK4/TREML4	10
GO:0046579	GO:0046579	positive regulation of Ras protein signal transduction	5/487	71/18866	0.0364001	0.337659	0.306887	APOA1/GPR35/LPAR1/MAPRE2/P2RY10	5
GO:0045638	GO:0045638	negative regulation of myeloid cell differentiation	6/487	95/18866	0.0364032	0.337659	0.306887	HMGB3/NCAPG2/RARA/TAL1/ZBTB16/TMEM178A	6
GO:0060337	GO:0060337	type I interferon signaling pathway	6/487	95/18866	0.0364032	0.337659	0.306887	GBP2/IRF4/OAS1/RSAD2/WNT5A/ZBP1	6
GO:0070167	GO:0070167	regulation of biomineral tissue development	6/487	95/18866	0.0364032	0.337659	0.306887	ACVR1/AHSG/ALOX5/AMELX/BMP2K/NOS3	6
GO:0071357	GO:0071357	cellular response to type I interferon	6/487	95/18866	0.0364032	0.337659	0.306887	GBP2/IRF4/OAS1/RSAD2/WNT5A/ZBP1	6
GO:0110149	GO:0110149	regulation of biomineralization	6/487	95/18866	0.0364032	0.337659	0.306887	ACVR1/AHSG/ALOX5/AMELX/BMP2K/NOS3	6
GO:0006002	GO:0006002	fructose 6-phosphate metabolic process	2/487	12/18866	0.0369849	0.337659	0.306887	FBP1/HK2	2
GO:0010960	GO:0010960	magnesium ion homeostasis	2/487	12/18866	0.0369849	0.337659	0.306887	CNNM2/KCNA1	2
GO:0014745	GO:0014745	negative regulation of muscle adaptation	2/487	12/18866	0.0369849	0.337659	0.306887	FOXO1/NOS3	2
GO:0032621	GO:0032621	interleukin-18 production	2/487	12/18866	0.0369849	0.337659	0.306887	TLR9/GBP5	2
GO:0033690	GO:0033690	positive regulation of osteoblast proliferation	2/487	12/18866	0.0369849	0.337659	0.306887	LRP5/SOX8	2
GO:0060453	GO:0060453	regulation of gastric acid secretion	2/487	12/18866	0.0369849	0.337659	0.306887	OXTR/HIP1R	2
GO:0071639	GO:0071639	positive regulation of monocyte chemotactic protein-1 production	2/487	12/18866	0.0369849	0.337659	0.306887	MCOLN2/TRPV4	2
GO:0099149	GO:0099149	regulation of postsynaptic neurotransmitter receptor internalization	2/487	12/18866	0.0369849	0.337659	0.306887	ARC/ITGB3	2
GO:1904953	GO:1904953	Wnt signaling pathway involved in midbrain dopaminergic neuron differentiation	2/487	12/18866	0.0369849	0.337659	0.306887	FZD1/WNT5A	2
GO:1905214	GO:1905214	regulation of RNA binding	2/487	12/18866	0.0369849	0.337659	0.306887	CDK9/NCBP1	2
GO:0072593	GO:0072593	reactive oxygen species metabolic process	13/487	288/18866	0.0370371	0.337659	0.306887	ALOX5/BCR/FOXO1/GCH1/GPX1/HK2/ITGAM/NOS3/NOX1/PLIN5/RORA/F2/FPR2	13
GO:0030833	GO:0030833	regulation of actin filament polymerization	9/487	174/18866	0.0370465	0.337659	0.306887	ALOX15/MLST8/NCKAP1L/PFN2/SSH3/TMOD1/WHAMMP3/VIL1/HIP1R	9
GO:0055123	GO:0055123	digestive system development	8/487	147/18866	0.037114	0.337659	0.306887	IL6ST/OXTR/RBPMS2/WNT5A/SHOX2/VANGL2/WNT11/HIP1R	8
GO:0006111	GO:0006111	regulation of gluconeogenesis	4/487	49/18866	0.0373007	0.337919	0.307123	CRY1/FBP1/FOXO1/PGP	4
GO:0047496	GO:0047496	vesicle transport along microtubule	4/487	49/18866	0.0373007	0.337919	0.307123	BLOC1S4/KIF13A/SYBU/PRKCZ	4
GO:0036296	GO:0036296	response to increased oxygen levels	3/487	29/18866	0.0380125	0.339957	0.308975	ATP6V1A/FOXO1/NOX1	3
GO:0042634	GO:0042634	regulation of hair cycle	3/487	29/18866	0.0380125	0.339957	0.308975	SPINK5/WNT5A/NGFR	3
GO:0045577	GO:0045577	regulation of B cell differentiation	3/487	29/18866	0.0380125	0.339957	0.308975	HMGB3/NCKAP1L/TLR9	3
GO:0060351	GO:0060351	cartilage development involved in endochondral bone morphogenesis	3/487	29/18866	0.0380125	0.339957	0.308975	RARA/TRPV4/SHOX2	3
GO:0061615	GO:0061615	glycolytic process through fructose-6-phosphate	3/487	29/18866	0.0380125	0.339957	0.308975	ALDOC/ENO2/HK2	3
GO:0002690	GO:0002690	positive regulation of leukocyte chemotaxis	6/487	96/18866	0.0380205	0.339957	0.308975	NCKAP1L/STK39/TNFSF14/TRPV4/WNT5A/FPR2	6
GO:1904062	GO:1904062	regulation of cation transmembrane transport	15/487	349/18866	0.0381853	0.339957	0.308975	ACTN4/ARC/FXYD2/GPR35/STK39/TLR9/YWHAH/CALCR/F2/FXYD7/KCNS2/THY1/CACNG5/KCNA1/RGS9	15
GO:0019226	GO:0019226	transmission of nerve impulse	5/487	72/18866	0.0383206	0.339957	0.308975	GPR35/KCNMB4/CACNG5/KCNA1/NTRK2	5
GO:0043647	GO:0043647	inositol phosphate metabolic process	5/487	72/18866	0.0383206	0.339957	0.308975	IMPA2/PLCB4/PPIP5K1/FGF2/NUDT11	5
GO:0050663	GO:0050663	cytokine secretion	5/487	72/18866	0.0383206	0.339957	0.308975	BTN3A1/IL1A/RGCC/TLR1/TLR9	5
GO:0060485	GO:0060485	mesenchyme development	13/487	290/18866	0.0388026	0.343519	0.312213	ACVR1/AMELX/DPPA4/NOS3/RGCC/SEMA4A/SPRED3/WNT5A/ALX1/WNT11/MEOX1/RANBP3L/SOX8	13
GO:0021782	GO:0021782	glial cell development	7/487	122/18866	0.0389259	0.343899	0.312558	ADGRG6/CNTF/LPAR1/SKI/FPR2/PRX/NTRK2	7
GO:0002791	GO:0002791	regulation of peptide secretion	16/487	381/18866	0.039483	0.345802	0.314288	ALOX5/CAPN10/GOLPH3L/IL1A/LRP5/RGCC/RHBDF1/RSAD2/SYBU/TLR1/TLR9/APLN/EXPH5/SYT9/ADCY8/CD22	16
GO:0060348	GO:0060348	bone development	10/487	204/18866	0.0395082	0.345802	0.314288	LRP5/NAB2/NPR2/RARA/SKI/TAL1/TRPV4/SHOX2/RANBP3L/SFRP4	10
GO:0060541	GO:0060541	respiratory system development	10/487	204/18866	0.0395082	0.345802	0.314288	CRISPLD2/DPPA4/NOS3/RARA/SKI/WNT5A/FGF2/VANGL2/WNT11/SLC7A11	10
GO:0036473	GO:0036473	cell death in response to oxidative stress	6/487	97/18866	0.039683	0.345802	0.314288	FZD1/GPX1/NOX1/VNN1/MELK/SLC7A11	6
GO:0046634	GO:0046634	regulation of alpha-beta T cell activation	6/487	97/18866	0.039683	0.345802	0.314288	CD274/IRF4/NCKAP1L/RARA/ZBTB16/PRKCZ	6
GO:0050764	GO:0050764	regulation of phagocytosis	6/487	97/18866	0.039683	0.345802	0.314288	AHSG/ALOX15/APOA1/BCR/NCKAP1L/FPR2	6
GO:0032409	GO:0032409	regulation of transporter activity	13/487	291/18866	0.0397074	0.345802	0.314288	ACTN4/ARC/FXYD2/GPR35/STK39/TLR9/YWHAH/ANO9/FXYD7/KCNS2/CACNG5/KCNA1/RGS9	13
GO:0010517	GO:0010517	regulation of phospholipase activity	5/487	73/18866	0.040302	0.350267	0.318346	LPAR1/FGF2/NMUR1/NTRK2/PRKCZ	5
GO:0007173	GO:0007173	epidermal growth factor receptor signaling pathway	7/487	123/18866	0.0403995	0.350402	0.318469	CDH13/GAB1/HBEGF/RHBDF1/GRB7/VIL1/HIP1R	7
GO:1901342	GO:1901342	regulation of vasculature development	18/487	444/18866	0.0404949	0.350519	0.318575	ALOX5/ANGPT4/GAB1/HK2/IL1A/LRG1/NOS3/RGCC/SEMA4A/SPINK5/TMIGD2/WNT5A/FGF2/NGFR/RHOJ/TNMD/PDGFD/PROK2	18
GO:0050708	GO:0050708	regulation of protein secretion	15/487	352/18866	0.0406453	0.35111	0.319112	ALOX5/CAPN10/GOLPH3L/IL1A/LRP5/RGCC/RHBDF1/RSAD2/SYBU/TLR1/TLR9/EXPH5/SYT9/ADCY8/CD22	15
GO:0003209	GO:0003209	cardiac atrium morphogenesis	3/487	30/18866	0.0414517	0.351321	0.319304	ACVR1/WNT5A/SHOX2	3
GO:0003401	GO:0003401	axis elongation	3/487	30/18866	0.0414517	0.351321	0.319304	WNT5A/VANGL2/WNT11	3
GO:0043372	GO:0043372	positive regulation of CD4-positive, alpha-beta T cell differentiation	3/487	30/18866	0.0414517	0.351321	0.319304	NCKAP1L/RARA/PRKCZ	3
GO:0060055	GO:0060055	angiogenesis involved in wound healing	3/487	30/18866	0.0414517	0.351321	0.319304	ALOX5/GPX1/ITGB3	3
GO:0120033	GO:0120033	negative regulation of plasma membrane bounded cell projection assembly	3/487	30/18866	0.0414517	0.351321	0.319304	PFN2/TBC1D30/ARHGAP24	3
GO:1904018	GO:1904018	positive regulation of vasculature development	11/487	235/18866	0.0421771	0.351321	0.319304	ANGPT4/GAB1/HK2/IL1A/LRG1/NOS3/TMIGD2/WNT5A/FGF2/RHOJ/PDGFD	11
GO:0032873	GO:0032873	negative regulation of stress-activated MAPK cascade	4/487	51/18866	0.0422848	0.351321	0.319304	AMBP/FOXO1/KLHL31/SH3RF2	4
GO:0043277	GO:0043277	apoptotic cell clearance	4/487	51/18866	0.0422848	0.351321	0.319304	ALOX15/ITGB3/RARA/TGM2	4
GO:0070303	GO:0070303	negative regulation of stress-activated protein kinase signaling cascade	4/487	51/18866	0.0422848	0.351321	0.319304	AMBP/FOXO1/KLHL31/SH3RF2	4
GO:0090102	GO:0090102	cochlea development	4/487	51/18866	0.0422848	0.351321	0.319304	IFT20/SOBP/WNT5A/VANGL2	4
GO:1902893	GO:1902893	regulation of pri-miRNA transcription by RNA polymerase II	4/487	51/18866	0.0422848	0.351321	0.319304	SMAD6/APLN/FGF2/NGFR	4
GO:0006801	GO:0006801	superoxide metabolic process	5/487	74/18866	0.0423445	0.351321	0.319304	GCH1/ITGAM/NOS3/NOX1/FPR2	5
GO:0034121	GO:0034121	regulation of toll-like receptor signaling pathway	5/487	74/18866	0.0423445	0.351321	0.319304	IRF4/RSAD2/TLR1/TLR9/TREML4	5
GO:0016331	GO:0016331	morphogenesis of embryonic epithelium	8/487	151/18866	0.0423946	0.351321	0.319304	FZD1/RARA/SKI/WNT5A/ALX1/DLC1/VANGL2/SOX8	8
GO:0035567	GO:0035567	non-canonical Wnt signaling pathway	8/487	151/18866	0.0423946	0.351321	0.319304	FZD1/PSMD11/PSMD13/WNT5A/VANGL2/WNT11/ZNRF3/SFRP4	8
GO:0006066	GO:0006066	alcohol metabolic process	16/487	385/18866	0.0427156	0.351321	0.319304	ALDH3A2/APOA1/CES1/CYP3A4/GCH1/IMPA2/LRP5/OSBPL5/PGP/PLCB4/PPIP5K1/SMPD1/FGF2/NUDT11/PDXP/SGPP2	16
GO:0031349	GO:0031349	positive regulation of defense response	16/487	385/18866	0.0427156	0.351321	0.319304	HMGB3/IKBKB/IL17RC/IL6ST/MAPK13/NOD1/PSMD11/PSMD13/PYHIN1/TGM2/TLR9/TRPV4/WNT5A/FPR2/GBP5/ZBP1	16
GO:0001833	GO:0001833	inner cell mass cell proliferation	2/487	13/18866	0.0429765	0.351321	0.319304	GINS4/NCAPG2	2
GO:0002430	GO:0002430	complement receptor mediated signaling pathway	2/487	13/18866	0.0429765	0.351321	0.319304	FPR3/FPR2	2
GO:0010623	GO:0010623	programmed cell death involved in cell development	2/487	13/18866	0.0429765	0.351321	0.319304	CNTF/IL1A	2
GO:0016024	GO:0016024	CDP-diacylglycerol biosynthetic process	2/487	13/18866	0.0429765	0.351321	0.319304	CDS2/GPAT2	2
GO:0042921	GO:0042921	glucocorticoid receptor signaling pathway	2/487	13/18866	0.0429765	0.351321	0.319304	CRY1/YWHAH	2
GO:0043248	GO:0043248	proteasome assembly	2/487	13/18866	0.0429765	0.351321	0.319304	PSMD11/PSMD13	2
GO:0045759	GO:0045759	negative regulation of action potential	2/487	13/18866	0.0429765	0.351321	0.319304	GPR35/CNR2	2
GO:0060340	GO:0060340	positive regulation of type I interferon-mediated signaling pathway	2/487	13/18866	0.0429765	0.351321	0.319304	WNT5A/ZBP1	2
GO:0060601	GO:0060601	lateral sprouting from an epithelium	2/487	13/18866	0.0429765	0.351321	0.319304	WNT5A/VANGL2	2
GO:0150105	GO:0150105	protein localization to cell-cell junction	2/487	13/18866	0.0429765	0.351321	0.319304	ACTN4/MPP7	2
GO:1902563	GO:1902563	regulation of neutrophil activation	2/487	13/18866	0.0429765	0.351321	0.319304	BCR/ITGAM	2
GO:0034340	GO:0034340	response to type I interferon	6/487	99/18866	0.0431444	0.351321	0.319304	GBP2/IRF4/OAS1/RSAD2/WNT5A/ZBP1	6
GO:0050830	GO:0050830	defense response to Gram-positive bacterium	6/487	99/18866	0.0431444	0.351321	0.319304	DROSHA/GBP2/GBP4/IL27RA/NOD1/RNASE3	6
GO:0003002	GO:0003002	regionalization	15/487	355/18866	0.0432168	0.351321	0.319304	ACVR1/ARC/CDON/GPR161/ITGAM/LRP5/SKI/SMAD6/WNT5A/ALX1/VANGL2/WNT11/ZBTB16/MEOX1/RFX4	15
GO:0051146	GO:0051146	striated muscle cell differentiation	13/487	295/18866	0.0434759	0.352757	0.320609	ACVR1/CDON/GPX1/IFT20/KRT8/MYLK3/RARA/RBM38/SKI/TMOD1/TNFSF14/ERVFRD-1/SHOX2	13
GO:0002224	GO:0002224	toll-like receptor signaling pathway	8/487	152/18866	0.0437885	0.354621	0.322303	IKBKB/IRF4/ITGAM/RSAD2/TLR1/TLR9/IRAK4/TREML4	8
GO:0045766	GO:0045766	positive regulation of angiogenesis	10/487	208/18866	0.0440945	0.356424	0.323942	ANGPT4/GAB1/HK2/IL1A/LRG1/NOS3/TMIGD2/WNT5A/FGF2/RHOJ	10
GO:0001707	GO:0001707	mesoderm formation	5/487	75/18866	0.0444483	0.356664	0.32416	ACVR1/ITGB3/TAL1/WNT5A/WNT11	5
GO:0099518	GO:0099518	vesicle cytoskeletal trafficking	5/487	75/18866	0.0444483	0.356664	0.32416	ACTN4/BLOC1S4/KIF13A/SYBU/PRKCZ	5
GO:0033059	GO:0033059	cellular pigmentation	4/487	52/18866	0.0449109	0.356664	0.32416	BLOC1S4/KIF13A/PMEL/SHROOM2	4
GO:0072132	GO:0072132	mesenchyme morphogenesis	4/487	52/18866	0.0449109	0.356664	0.32416	ACVR1/NOS3/WNT5A/WNT11	4
GO:0046364	GO:0046364	monosaccharide biosynthetic process	6/487	100/18866	0.0449439	0.356664	0.32416	ALDOC/CRY1/ENO2/FBP1/FOXO1/PGP	6
GO:0000305	GO:0000305	response to oxygen radical	3/487	31/18866	0.0450418	0.356664	0.32416	GCH1/NOS3/TXNRD2	3
GO:0050858	GO:0050858	negative regulation of antigen receptor-mediated signaling pathway	3/487	31/18866	0.0450418	0.356664	0.32416	SLA2/THY1/CD22	3
GO:0061037	GO:0061037	negative regulation of cartilage development	3/487	31/18866	0.0450418	0.356664	0.32416	CHADL/RARA/WNT11	3
GO:0072538	GO:0072538	T-helper 17 type immune response	3/487	31/18866	0.0450418	0.356664	0.32416	IL27RA/IRF4/RORA	3
GO:1903792	GO:1903792	negative regulation of anion transport	3/487	31/18866	0.0450418	0.356664	0.32416	STK39/ANO9/SFRP4	3
GO:2000406	GO:2000406	positive regulation of T cell migration	3/487	31/18866	0.0450418	0.356664	0.32416	STK39/TNFSF14/WNT5A	3
GO:0034764	GO:0034764	positive regulation of transmembrane transport	10/487	210/18866	0.046518	0.36428	0.331082	ACTN4/ARC/CAPN10/STK39/CALCR/CLIP3/F2/THY1/KCNA1/RGS9	10
GO:0030326	GO:0030326	embryonic limb morphogenesis	7/487	127/18866	0.0466549	0.36428	0.331082	CRABP2/LRP5/SKI/WNT5A/ALX1/SHOX2/ZBTB16	7
GO:0035113	GO:0035113	embryonic appendage morphogenesis	7/487	127/18866	0.0466549	0.36428	0.331082	CRABP2/LRP5/SKI/WNT5A/ALX1/SHOX2/ZBTB16	7
GO:0010977	GO:0010977	negative regulation of neuron projection development	8/487	154/18866	0.0466662	0.36428	0.331082	CDK5R1/LPAR1/SEMA4A/TRPV4/WNT5A/YWHAH/NGFR/THY1	8
GO:0042102	GO:0042102	positive regulation of T cell proliferation	6/487	101/18866	0.0467896	0.36428	0.331082	CD274/IL1A/IL27RA/IL6ST/NCKAP1L/TMIGD2	6
GO:0042116	GO:0042116	macrophage activation	6/487	101/18866	0.0467896	0.36428	0.331082	ITGAM/LRFN5/RORA/TLR1/WNT5A/FPR2	6
GO:0042632	GO:0042632	cholesterol homeostasis	6/487	101/18866	0.0467896	0.36428	0.331082	APOA1/CES1/LRP5/MALL/RORA/APOM	6
GO:0032964	GO:0032964	collagen biosynthetic process	4/487	53/18866	0.0476262	0.36428	0.331082	AMELX/RGCC/TRAM2/F2	4
GO:0045661	GO:0045661	regulation of myoblast differentiation	4/487	53/18866	0.0476262	0.36428	0.331082	CDON/TNFSF14/RANBP3L/SOX8	4
GO:0061614	GO:0061614	pri-miRNA transcription by RNA polymerase II	4/487	53/18866	0.0476262	0.36428	0.331082	SMAD6/APLN/FGF2/NGFR	4
GO:0030900	GO:0030900	forebrain development	16/487	391/18866	0.0479132	0.36428	0.331082	ALK/CDK5R1/CDON/ITGAM/LPAR1/OXTR/RARA/RRM1/SECISBP2/SKI/WNT5A/DLC1/KCNA1/NTRK2/RFX4/SLC7A11	16
GO:0030509	GO:0030509	BMP signaling pathway	8/487	155/18866	0.0481503	0.36428	0.331082	ACVR1/FZD1/RBPMS2/SKI/SMAD6/WNT5A/FAM83G/SFRP4	8
GO:0051091	GO:0051091	positive regulation of DNA-binding transcription factor activity	12/487	270/18866	0.048406	0.36428	0.331082	ALK/FZD1/IKBKB/LRP5/NOD1/RGCC/TLR9/WNT5A/ADCY1/ADCY8/PRKCZ/TRIML2	12
GO:0031098	GO:0031098	stress-activated protein kinase signaling cascade	13/487	300/18866	0.0485301	0.36428	0.331082	AMBP/FOXO1/IKBKB/MAPK13/NOD1/NOX1/TLR9/TRPV4/WNT5A/IRAK4/KLHL31/SH3RF2/VANGL2	13
GO:0055092	GO:0055092	sterol homeostasis	6/487	102/18866	0.0486816	0.36428	0.331082	APOA1/CES1/LRP5/MALL/RORA/APOM	6
GO:0030201	GO:0030201	heparan sulfate proteoglycan metabolic process	3/487	32/18866	0.0487809	0.36428	0.331082	HS3ST5/HS6ST2/VANGL2	3
GO:0048741	GO:0048741	skeletal muscle fiber development	3/487	32/18866	0.0487809	0.36428	0.331082	GPX1/SKI/SHOX2	3
GO:0070528	GO:0070528	protein kinase C signaling	3/487	32/18866	0.0487809	0.36428	0.331082	WNT5A/WNT11/PRKCZ	3
GO:0086019	GO:0086019	cell-cell signaling involved in cardiac conduction	3/487	32/18866	0.0487809	0.36428	0.331082	KCNJ5/NUP155/GJC1	3
GO:1901889	GO:1901889	negative regulation of cell junction assembly	3/487	32/18866	0.0487809	0.36428	0.331082	IKBKB/WNT5A/DLC1	3
GO:0046785	GO:0046785	microtubule polymerization	5/487	77/18866	0.0488406	0.36428	0.331082	CDK5R1/TRPV4/TUBG1/CLIP3/SLC39A12	5
GO:0048332	GO:0048332	mesoderm morphogenesis	5/487	77/18866	0.0488406	0.36428	0.331082	ACVR1/ITGB3/TAL1/WNT5A/WNT11	5
GO:1903201	GO:1903201	regulation of oxidative stress-induced cell death	5/487	77/18866	0.0488406	0.36428	0.331082	FZD1/GPX1/NOX1/VNN1/SLC7A11	5
GO:0001886	GO:0001886	endothelial cell morphogenesis	2/487	14/18866	0.0493005	0.36428	0.331082	TNMD/COL22A1	2
GO:0010896	GO:0010896	regulation of triglyceride catabolic process	2/487	14/18866	0.0493005	0.36428	0.331082	APOA1/PLIN5	2
GO:0010935	GO:0010935	regulation of macrophage cytokine production	2/487	14/18866	0.0493005	0.36428	0.331082	SPON2/WNT5A	2
GO:0021781	GO:0021781	glial cell fate commitment	2/487	14/18866	0.0493005	0.36428	0.331082	TAL1/SOX8	2
GO:0030836	GO:0030836	positive regulation of actin filament depolymerization	2/487	14/18866	0.0493005	0.36428	0.331082	PDXP/VIL1	2
GO:0030948	GO:0030948	negative regulation of vascular endothelial growth factor receptor signaling pathway	2/487	14/18866	0.0493005	0.36428	0.331082	CADM4/TNMD	2
GO:0031958	GO:0031958	corticosteroid receptor signaling pathway	2/487	14/18866	0.0493005	0.36428	0.331082	CRY1/YWHAH	2
GO:0032488	GO:0032488	Cdc42 protein signal transduction	2/487	14/18866	0.0493005	0.36428	0.331082	APOA1/RHOJ	2
GO:0034356	GO:0034356	NAD biosynthesis via nicotinamide riboside salvage pathway	2/487	14/18866	0.0493005	0.36428	0.331082	RNLS/NNMT	2
GO:0035358	GO:0035358	regulation of peroxisome proliferator activated receptor signaling pathway	2/487	14/18866	0.0493005	0.36428	0.331082	ALOX15/PLIN5	2
GO:0045176	GO:0045176	apical protein localization	2/487	14/18866	0.0493005	0.36428	0.331082	SHROOM2/VANGL2	2
GO:0046341	GO:0046341	CDP-diacylglycerol metabolic process	2/487	14/18866	0.0493005	0.36428	0.331082	CDS2/GPAT2	2
GO:0047484	GO:0047484	regulation of response to osmotic stress	2/487	14/18866	0.0493005	0.36428	0.331082	MLC1/TRPV4	2
GO:0070234	GO:0070234	positive regulation of T cell apoptotic process	2/487	14/18866	0.0493005	0.36428	0.331082	CD274/WNT5A	2
GO:1900452	GO:1900452	regulation of long-term synaptic depression	2/487	14/18866	0.0493005	0.36428	0.331082	ARC/ADCY8	2
GO:0000187	GO:0000187	activation of MAPK activity	8/487	156/18866	0.0496648	0.36428	0.331082	ALK/LPAR1/MAP2K6/NOD1/STK39/WNT5A/FGF2/PROK2	8
GO:0008360	GO:0008360	regulation of cell shape	8/487	156/18866	0.0496648	0.36428	0.331082	LPAR1/PARVB/SEMA4A/DLC1/F2/FBLIM1/RHOJ/VIL1	8
GO:0043484	GO:0043484	regulation of RNA splicing	8/487	156/18866	0.0496648	0.36428	0.331082	HABP4/METTL4/NCBP1/NSRP1/RBFOX3/RBM15B/RBM38/PRX	8
GO:1902904	GO:1902904	negative regulation of supramolecular fiber organization	8/487	156/18866	0.0496648	0.36428	0.331082	CHADL/PFN2/SSH3/TMOD1/CLIP3/DLC1/VIL1/HIP1R	8
GO:0046328	GO:0046328	regulation of JNK cascade	9/487	184/18866	0.049752	0.36428	0.331082	AMBP/NOD1/NOX1/TLR9/TRPV4/WNT5A/KLHL31/SH3RF2/VANGL2	9
GO:0090090	GO:0090090	negative regulation of canonical Wnt signaling pathway	9/487	184/18866	0.049752	0.36428	0.331082	FOXO1/FZD1/LATS2/PSMD11/PSMD13/WNT5A/WNT11/ZNRF3/SFRP4	9
GO:0006813	GO:0006813	potassium ion transport	11/487	242/18866	0.0501707	0.36655	0.333145	FXYD2/KCNJ5/KCNK5/KCNK6/KCNMB4/NOS3/STK39/KCNJ12/KCNS2/KCNA1/KCNA10	11
GO:0007254	GO:0007254	JNK cascade	10/487	213/18866	0.0503192	0.36655	0.333145	AMBP/NOD1/NOX1/TLR9/TRPV4/WNT5A/IRAK4/KLHL31/SH3RF2/VANGL2	10
GO:0016051	GO:0016051	carbohydrate biosynthetic process	10/487	213/18866	0.0503192	0.36655	0.333145	ALDOC/B3GNT7/CRY1/ENO2/FBP1/FOXO1/FUT8/IMPA2/PGP/PDXP	10
GO:0001823	GO:0001823	mesonephros development	6/487	103/18866	0.0506202	0.36749	0.334	RARA/SMAD6/FGF2/WNT11/ZBTB16/SOX8	6
GO:0098869	GO:0098869	cellular oxidant detoxification	6/487	103/18866	0.0506202	0.36749	0.334	GCH1/GPX1/NOS3/TP53INP1/APOM/TXNRD2	6
GO:0042310	GO:0042310	vasoconstriction	5/487	78/18866	0.0511293	0.370558	0.336788	ARHGAP42/HTR7/KCNMB4/OXTR/APLN	5
GO:0018209	GO:0018209	peptidyl-serine modification	14/487	333/18866	0.0513276	0.371365	0.337521	CDK5R1/CSNK1G3/DYRK3/GALNT1/IKBKB/LATS2/MAPK13/PFN2/STK39/TSSK6/WNT5A/CALCR/NTRK2/PRKCZ	14
GO:0007159	GO:0007159	leukocyte cell-cell adhesion	15/487	364/18866	0.0516208	0.3723	0.338372	ALOX5/CD274/IL1A/IL20RB/IL27RA/IL6ST/IL7R/NCKAP1L/RARA/TMIGD2/TNFSF14/VNN1/THY1/ZBTB16/PRKCZ	15
GO:0006006	GO:0006006	glucose metabolic process	10/487	214/18866	0.051631	0.3723	0.338372	ALDOC/CRY1/ENO2/FBP1/FOXO1/HK2/LRP5/OAS1/PGP/RORA	10
GO:0009410	GO:0009410	response to xenobiotic stimulus	7/487	130/18866	0.0517315	0.372397	0.33846	ACAA1/CES1/CYP2E1/CYP2S1/CYP3A4/GPX1/RORA	7
GO:0033002	GO:0033002	muscle cell proliferation	11/487	244/18866	0.0526305	0.376593	0.342273	CDH13/HBEGF/NOS3/NOX1/PTGIR/RBPMS2/TGM2/APLN/FGF2/IRAK4/PDGFD	11
GO:0001975	GO:0001975	response to amphetamine	3/487	33/18866	0.0526667	0.376593	0.342273	OXTR/CNR2/RGS9	3
GO:0048011	GO:0048011	neurotrophin TRK receptor signaling pathway	3/487	33/18866	0.0526667	0.376593	0.342273	AKT1S1/NGFR/NTRK2	3
GO:0048384	GO:0048384	retinoic acid receptor signaling pathway	3/487	33/18866	0.0526667	0.376593	0.342273	ACTN4/CRABP2/RARA	3
GO:0002720	GO:0002720	positive regulation of cytokine production involved in immune response	4/487	55/18866	0.0533237	0.38002	0.345388	RSAD2/SPON2/WNT5A/PRKCZ	4
GO:0060350	GO:0060350	endochondral bone morphogenesis	4/487	55/18866	0.0533237	0.38002	0.345388	NAB2/RARA/TRPV4/SHOX2	4
GO:0045667	GO:0045667	regulation of osteoblast differentiation	7/487	131/18866	0.053498	0.380628	0.34594	ACVR1/IL6ST/LRP5/SKI/SMAD6/RANBP3L/RORB	7
GO:0048511	GO:0048511	rhythmic process	13/487	305/18866	0.0539768	0.383397	0.348457	CDK5R1/CRY1/HTR7/MAP2K6/NOS3/OXTR/RORA/ADCY1/HS3ST2/NGFR/NTRK2/PROK2/RORB	13
GO:0044070	GO:0044070	regulation of anion transport	6/487	105/18866	0.0546374	0.386793	0.351543	APOA1/CES1/MAP2K6/STK39/ANO9/SFRP4	6
GO:0043123	GO:0043123	positive regulation of I-kappaB kinase/NF-kappaB signaling	9/487	188/18866	0.0555508	0.386793	0.351543	CANT1/IKBKB/LPAR1/NOD1/PELI2/TGM2/TLR9/IRAK4/TRIML2	9
GO:0003151	GO:0003151	outflow tract morphogenesis	5/487	80/18866	0.0558923	0.386793	0.351543	FZD1/RARA/SMAD6/WNT5A/WNT11	5
GO:0006000	GO:0006000	fructose metabolic process	2/487	15/18866	0.0559357	0.386793	0.351543	ALDOC/FBP1	2
GO:0018298	GO:0018298	protein-chromophore linkage	2/487	15/18866	0.0559357	0.386793	0.351543	AMBP/CRY1	2
GO:0035745	GO:0035745	T-helper 2 cell cytokine production	2/487	15/18866	0.0559357	0.386793	0.351543	RSAD2/PRKCZ	2
GO:0043517	GO:0043517	positive regulation of DNA damage response, signal transduction by p53 class mediator	2/487	15/18866	0.0559357	0.386793	0.351543	PYHIN1/SPRED3	2
GO:0045198	GO:0045198	establishment of epithelial cell apical/basal polarity	2/487	15/18866	0.0559357	0.386793	0.351543	IFT20/WNT5A	2
GO:0060099	GO:0060099	regulation of phagocytosis, engulfment	2/487	15/18866	0.0559357	0.386793	0.351543	ALOX15/NCKAP1L	2
GO:0060253	GO:0060253	negative regulation of glial cell proliferation	2/487	15/18866	0.0559357	0.386793	0.351543	SKI/ASCL2	2
GO:0072148	GO:0072148	epithelial cell fate commitment	2/487	15/18866	0.0559357	0.386793	0.351543	ACVR1/RARA	2
GO:0090594	GO:0090594	inflammatory response to wounding	2/487	15/18866	0.0559357	0.386793	0.351543	ALOX5/IL1A	2
GO:0099171	GO:0099171	presynaptic modulation of chemical synaptic transmission	2/487	15/18866	0.0559357	0.386793	0.351543	SYT9/RAB26	2
GO:1903960	GO:1903960	negative regulation of anion transmembrane transport	2/487	15/18866	0.0559357	0.386793	0.351543	STK39/ANO9	2
GO:2000402	GO:2000402	negative regulation of lymphocyte migration	2/487	15/18866	0.0559357	0.386793	0.351543	CD200R1/IL27RA	2
GO:0001755	GO:0001755	neural crest cell migration	4/487	56/18866	0.0563051	0.386793	0.351543	ACVR1/SEMA4A/ALX1/SOX8	4
GO:0051271	GO:0051271	negative regulation of cellular component movement	16/487	400/18866	0.0565228	0.386793	0.351543	ACTN4/ANGPT4/BCR/CD200R1/GPR173/IL27RA/PFN2/PTPRR/RGCC/SEMA4A/TP53INP1/WNT5A/DLC1/FGF2/THY1/WNT11	16
GO:0007202	GO:0007202	activation of phospholipase C activity	3/487	34/18866	0.056697	0.386793	0.351543	LPAR1/NMUR1/NTRK2	3
GO:0019228	GO:0019228	neuronal action potential	3/487	34/18866	0.056697	0.386793	0.351543	GPR35/KCNMB4/KCNA1	3
GO:0032148	GO:0032148	activation of protein kinase B activity	3/487	34/18866	0.056697	0.386793	0.351543	MLST8/WNT5A/PRKCZ	3
GO:0042311	GO:0042311	vasodilation	3/487	34/18866	0.056697	0.386793	0.351543	GCH1/GPX1/NOS3	3
GO:0043516	GO:0043516	regulation of DNA damage response, signal transduction by p53 class mediator	3/487	34/18866	0.056697	0.386793	0.351543	DYRK3/PYHIN1/SPRED3	3
GO:0070232	GO:0070232	regulation of T cell apoptotic process	3/487	34/18866	0.056697	0.386793	0.351543	CD274/IL7R/WNT5A	3
GO:0030038	GO:0030038	contractile actin filament bundle assembly	6/487	106/18866	0.0567163	0.386793	0.351543	APOA1/LPAR1/PFN2/RGCC/DLC1/WNT11	6
GO:0043149	GO:0043149	stress fiber assembly	6/487	106/18866	0.0567163	0.386793	0.351543	APOA1/LPAR1/PFN2/RGCC/DLC1/WNT11	6
GO:0071805	GO:0071805	potassium ion transmembrane transport	10/487	218/18866	0.057105	0.387848	0.352502	FXYD2/KCNJ5/KCNK5/KCNK6/KCNMB4/STK39/KCNJ12/KCNS2/KCNA1/KCNA10	10
GO:0042770	GO:0042770	signal transduction in response to DNA damage	7/487	133/18866	0.0571431	0.387848	0.352502	BCL3/DYRK3/PLAGL1/PYHIN1/RGCC/SPRED3/E2F8	7
GO:0090101	GO:0090101	negative regulation of transmembrane receptor protein serine/threonine kinase signaling pathway	7/487	133/18866	0.0571431	0.387848	0.352502	ACVR1/FZD1/RBPMS2/SKI/SMAD6/SPRED3/WNT5A	7
GO:0034767	GO:0034767	positive regulation of ion transmembrane transport	8/487	161/18866	0.0576983	0.390995	0.355363	ACTN4/ARC/STK39/CALCR/F2/THY1/KCNA1/RGS9	8
GO:0032102	GO:0032102	negative regulation of response to external stimulus	17/487	433/18866	0.0580251	0.392587	0.35681	ALOX5/APOA1/BCR/CD200R1/GPX1/IL20RB/LRFN5/NOS3/RORA/SEMA4A/SPINK5/WNT5A/F2/FGF2/FPR2/IL1R2/CNR2	17
GO:0030178	GO:0030178	negative regulation of Wnt signaling pathway	10/487	219/18866	0.0585307	0.395383	0.359351	FOXO1/FZD1/LATS2/PSMD11/PSMD13/WNT5A/WNT11/ZNRF3/SFRP4/TRABD2A	10
GO:0051963	GO:0051963	regulation of synapse assembly	6/487	107/18866	0.0588422	0.39686	0.360693	FZD1/LRFN5/OXTR/SEMA4A/WNT5A/NTRK2	6
GO:0034329	GO:0034329	cell junction assembly	17/487	434/18866	0.0590213	0.397441	0.361221	ACTN4/BCR/FZD1/IKBKB/LRFN5/MPP7/OXTR/SEMA4A/TLN2/TRPV4/WNT5A/DLC1/FBLIM1/GJC1/THY1/WNT11/NTRK2	17
GO:0018105	GO:0018105	peptidyl-serine phosphorylation	13/487	310/18866	0.0598263	0.402228	0.365572	CDK5R1/CSNK1G3/DYRK3/IKBKB/LATS2/MAPK13/PFN2/STK39/TSSK6/WNT5A/CALCR/NTRK2/PRKCZ	13
GO:0099003	GO:0099003	vesicle-mediated transport in synapse	10/487	220/18866	0.0599795	0.402625	0.365933	ARC/CDK5R1/FCHO2/ITGB3/PFN2/PLD2/SYN3/ADCY1/STX19/SYT9	10
GO:0014904	GO:0014904	myotube cell development	3/487	35/18866	0.0608691	0.403457	0.366689	GPX1/SKI/SHOX2	3
GO:0030947	GO:0030947	regulation of vascular endothelial growth factor receptor signaling pathway	3/487	35/18866	0.0608691	0.403457	0.366689	ITGB3/CADM4/TNMD	3
GO:0032228	GO:0032228	regulation of synaptic transmission, GABAergic	3/487	35/18866	0.0608691	0.403457	0.366689	OXTR/SYN3/CNR2	3
GO:0036314	GO:0036314	response to sterol	3/487	35/18866	0.0608691	0.403457	0.366689	CES1/MLC1/RORA	3
GO:0048565	GO:0048565	digestive tract development	7/487	135/18866	0.0609385	0.403457	0.366689	IL6ST/OXTR/RBPMS2/WNT5A/SHOX2/VANGL2/WNT11	7
GO:0001523	GO:0001523	retinoid metabolic process	6/487	108/18866	0.0610152	0.403457	0.366689	APOA1/CRABP2/CYP2S1/CYP3A4/RBP1/APOM	6
GO:0006024	GO:0006024	glycosaminoglycan biosynthetic process	6/487	108/18866	0.0610152	0.403457	0.366689	B3GNT7/CHPF/CHST2/HS3ST5/HS3ST2/HS6ST2	6
GO:0021915	GO:0021915	neural tube development	8/487	163/18866	0.0611292	0.403457	0.366689	FZD1/GPR161/RARA/SKI/WNT5A/ALX1/DLC1/VANGL2	8
GO:0002064	GO:0002064	epithelial cell development	10/487	221/18866	0.0614514	0.403457	0.366689	GPX1/IKBKB/IL6ST/RARA/TMOD1/WNT5A/EXPH5/TNMD/COL22A1/SOX8	10
GO:0071241	GO:0071241	cellular response to inorganic substance	10/487	221/18866	0.0614514	0.403457	0.366689	ALOX15/FBP1/FOXO1/MT1H/WNT5A/ZNF658/ADCY1/SYT9/ADCY8/KCNA1	10
GO:0002833	GO:0002833	positive regulation of response to biotic stimulus	11/487	251/18866	0.0618727	0.403457	0.366689	CD274/HMGB3/IKBKB/NOD1/PSMD11/PSMD13/PYHIN1/WNT5A/FPR2/GBP5/ZBP1	11
GO:0002011	GO:0002011	morphogenesis of an epithelial sheet	4/487	58/18866	0.062531	0.403457	0.366689	HBEGF/WNT5A/ARHGAP24/VANGL2	4
GO:1900408	GO:1900408	negative regulation of cellular response to oxidative stress	4/487	58/18866	0.062531	0.403457	0.366689	FZD1/GPX1/VNN1/SLC7A11	4
GO:1903202	GO:1903202	negative regulation of oxidative stress-induced cell death	4/487	58/18866	0.062531	0.403457	0.366689	FZD1/GPX1/VNN1/SLC7A11	4
GO:0002696	GO:0002696	positive regulation of leukocyte activation	16/487	406/18866	0.0628239	0.403457	0.366689	CD274/IL1A/IL27RA/IL6ST/IL7R/ITGAM/NCKAP1L/RARA/TLR9/TMIGD2/TNFSF14/VNN1/WNT5A/THY1/ZBTB16/PRKCZ	16
GO:0043547	GO:0043547	positive regulation of GTPase activity	16/487	406/18866	0.0628239	0.403457	0.366689	ADPRH/ARHGAP42/BCR/MAPRE2/NCKAP1L/PREB/RGS16/TBC1D30/WNT5A/ARHGAP24/DLC1/TBC1D8B/THY1/WNT11/RANBP3L/RGS9	16
GO:0010934	GO:0010934	macrophage cytokine production	2/487	16/18866	0.062862	0.403457	0.366689	SPON2/WNT5A	2
GO:0034116	GO:0034116	positive regulation of heterotypic cell-cell adhesion	2/487	16/18866	0.062862	0.403457	0.366689	ALOX15/THY1	2
GO:0034380	GO:0034380	high-density lipoprotein particle assembly	2/487	16/18866	0.062862	0.403457	0.366689	APOA1/APOM	2
GO:0048820	GO:0048820	hair follicle maturation	2/487	16/18866	0.062862	0.403457	0.366689	SPINK5/WNT5A	2
GO:0051447	GO:0051447	negative regulation of meiotic cell cycle	2/487	16/18866	0.062862	0.403457	0.366689	NPR2/FBXO43	2
GO:0051770	GO:0051770	positive regulation of nitric-oxide synthase biosynthetic process	2/487	16/18866	0.062862	0.403457	0.366689	MAP2K6/TLR9	2
GO:0060628	GO:0060628	regulation of ER to Golgi vesicle-mediated transport	2/487	16/18866	0.062862	0.403457	0.366689	PREB/SAR1B	2
GO:1900451	GO:1900451	positive regulation of glutamate receptor signaling pathway	2/487	16/18866	0.062862	0.403457	0.366689	ARC/RGS9	2
GO:1904862	GO:1904862	inhibitory synapse assembly	2/487	16/18866	0.062862	0.403457	0.366689	SEMA4A/WNT5A	2
GO:1905153	GO:1905153	regulation of membrane invagination	2/487	16/18866	0.062862	0.403457	0.366689	ALOX15/NCKAP1L	2
GO:0050671	GO:0050671	positive regulation of lymphocyte proliferation	7/487	136/18866	0.0628928	0.403457	0.366689	CD274/IL1A/IL27RA/IL6ST/NCKAP1L/TLR9/TMIGD2	7
GO:0002286	GO:0002286	T cell activation involved in immune response	6/487	109/18866	0.0632351	0.403457	0.366689	BCL3/IRF4/RARA/RORA/SEMA4A/PRKCZ	6
GO:0043122	GO:0043122	regulation of I-kappaB kinase/NF-kappaB signaling	11/487	252/18866	0.0632745	0.403457	0.366689	CANT1/IKBKB/LPAR1/NOD1/PELI2/RORA/TGM2/TLR9/WNT5A/IRAK4/TRIML2	11
GO:0030111	GO:0030111	regulation of Wnt signaling pathway	15/487	375/18866	0.0633567	0.403457	0.366689	CSNK1G3/FOXO1/FZD1/IFT20/LATS2/PRDM15/PSMD11/PSMD13/SKI/WNT5A/VANGL2/WNT11/ZNRF3/SFRP4/TRABD2A	15
GO:0030041	GO:0030041	actin filament polymerization	9/487	193/18866	0.0633934	0.403457	0.366689	ALOX15/MLST8/NCKAP1L/PFN2/SSH3/TMOD1/WHAMMP3/VIL1/HIP1R	9
GO:0071248	GO:0071248	cellular response to metal ion	9/487	193/18866	0.0633934	0.403457	0.366689	ALOX15/FBP1/MT1H/WNT5A/ZNF658/ADCY1/SYT9/ADCY8/KCNA1	9
GO:0002718	GO:0002718	regulation of cytokine production involved in immune response	5/487	83/18866	0.0635002	0.403457	0.366689	APOA1/RSAD2/SPON2/WNT5A/PRKCZ	5
GO:0048145	GO:0048145	regulation of fibroblast proliferation	5/487	83/18866	0.0635002	0.403457	0.366689	SKI/TP53INP1/WNT5A/NGFR/PDGFD	5
GO:0048644	GO:0048644	muscle organ morphogenesis	5/487	83/18866	0.0635002	0.403457	0.366689	CNTF/FZD1/WNT5A/SHOX2/VANGL2	5
GO:0071277	GO:0071277	cellular response to calcium ion	5/487	83/18866	0.0635002	0.403457	0.366689	ALOX15/WNT5A/ADCY1/SYT9/ADCY8	5
GO:0046651	GO:0046651	lymphocyte proliferation	12/487	283/18866	0.06433	0.408069	0.37088	BTN3A1/CD274/IL1A/IL20RB/IL27RA/IL6ST/IL7R/NCKAP1L/TLR9/TMIGD2/TNFSF14/CD22	12
GO:0071902	GO:0071902	positive regulation of protein serine/threonine kinase activity	14/487	345/18866	0.0648265	0.408069	0.37088	ALK/CDK5R1/LPAR1/MAP2K6/MLST8/NOD1/RGCC/STK39/TLR9/WNT5A/FGF2/VANGL2/PDGFD/PROK2	14
GO:0032946	GO:0032946	positive regulation of mononuclear cell proliferation	7/487	137/18866	0.0648849	0.408069	0.37088	CD274/IL1A/IL27RA/IL6ST/NCKAP1L/TLR9/TMIGD2	7
GO:0002701	GO:0002701	negative regulation of production of molecular mediator of immune response	3/487	36/18866	0.0651803	0.408069	0.37088	APOA1/SPINK5/CD22	3
GO:0002755	GO:0002755	MyD88-dependent toll-like receptor signaling pathway	3/487	36/18866	0.0651803	0.408069	0.37088	TLR1/TLR9/IRAK4	3
GO:0031128	GO:0031128	developmental induction	3/487	36/18866	0.0651803	0.408069	0.37088	WNT5A/WNT11/SOX8	3
GO:0033762	GO:0033762	response to glucagon	3/487	36/18866	0.0651803	0.408069	0.37088	CRY1/ADCY1/ADCY8	3
GO:0042554	GO:0042554	superoxide anion generation	3/487	36/18866	0.0651803	0.408069	0.37088	ITGAM/NOX1/FPR2	3
GO:0045622	GO:0045622	regulation of T-helper cell differentiation	3/487	36/18866	0.0651803	0.408069	0.37088	IRF4/RARA/PRKCZ	3
GO:2000516	GO:2000516	positive regulation of CD4-positive, alpha-beta T cell activation	3/487	36/18866	0.0651803	0.408069	0.37088	NCKAP1L/RARA/PRKCZ	3
GO:0050707	GO:0050707	regulation of cytokine secretion	4/487	59/18866	0.0657743	0.411186	0.373713	IL1A/RGCC/TLR1/TLR9	4
GO:0019318	GO:0019318	hexose metabolic process	11/487	254/18866	0.06614	0.412386	0.374804	ALDOC/CRY1/ENO2/FBP1/FOXO1/FUT8/HK2/LRP5/OAS1/PGP/RORA	11
GO:0048144	GO:0048144	fibroblast proliferation	5/487	84/18866	0.0661593	0.412386	0.374804	SKI/TP53INP1/WNT5A/NGFR/PDGFD	5
GO:0042098	GO:0042098	T cell proliferation	9/487	195/18866	0.0667176	0.415261	0.377417	BTN3A1/CD274/IL1A/IL20RB/IL27RA/IL6ST/NCKAP1L/TMIGD2/TNFSF14	9
GO:0046330	GO:0046330	positive regulation of JNK cascade	7/487	138/18866	0.0669149	0.41528	0.377434	NOD1/NOX1/TLR9/TRPV4/WNT5A/SH3RF2/VANGL2	7
GO:0098754	GO:0098754	detoxification	7/487	138/18866	0.0669149	0.41528	0.377434	GCH1/GPX1/MT1H/NOS3/TP53INP1/APOM/TXNRD2	7
GO:0045665	GO:0045665	negative regulation of neuron differentiation	10/487	225/18866	0.0675722	0.41719	0.37917	CDK5R1/CNTF/LPAR1/SEMA4A/TRPV4/WNT5A/YWHAH/NGFR/THY1/SOX8	10
GO:0007249	GO:0007249	I-kappaB kinase/NF-kappaB signaling	12/487	286/18866	0.0684423	0.41719	0.37917	BCL3/CANT1/IKBKB/LPAR1/NOD1/PELI2/RORA/TGM2/TLR9/WNT5A/IRAK4/TRIML2	12
GO:0032943	GO:0032943	mononuclear cell proliferation	12/487	286/18866	0.0684423	0.41719	0.37917	BTN3A1/CD274/IL1A/IL20RB/IL27RA/IL6ST/IL7R/NCKAP1L/TLR9/TMIGD2/TNFSF14/CD22	12
GO:0043542	GO:0043542	endothelial cell migration	12/487	286/18866	0.0684423	0.41719	0.37917	ANGPT4/APOA1/CDH13/GPX1/ITGB3/LGALS8/NOS3/RGCC/SEMA4A/WNT5A/FGF2/RHOJ	12
GO:0006970	GO:0006970	response to osmotic stress	5/487	85/18866	0.0688797	0.41719	0.37917	LRRC8D/MAPK13/MLC1/STK39/TRPV4	5
GO:0035304	GO:0035304	regulation of protein dephosphorylation	7/487	139/18866	0.0689827	0.41719	0.37917	CDCA2/IKBKB/NCKAP1L/SMPD1/DLC1/SH3RF2/PPP2R2B	7
GO:0006893	GO:0006893	Golgi to plasma membrane transport	4/487	60/18866	0.0691036	0.41719	0.37917	GOLPH3L/KIF13A/OSBPL5/RAB26	4
GO:0019229	GO:0019229	regulation of vasoconstriction	4/487	60/18866	0.0691036	0.41719	0.37917	ARHGAP42/KCNMB4/OXTR/APLN	4
GO:0030865	GO:0030865	cortical cytoskeleton organization	4/487	60/18866	0.0691036	0.41719	0.37917	IKBKB/NCKAP1L/TRPV4/VIL1	4
GO:0061098	GO:0061098	positive regulation of protein tyrosine kinase activity	4/487	60/18866	0.0691036	0.41719	0.37917	HBEGF/NCAPG2/TAL1/NTRK2	4
GO:1902883	GO:1902883	negative regulation of response to oxidative stress	4/487	60/18866	0.0691036	0.41719	0.37917	FZD1/GPX1/VNN1/SLC7A11	4
GO:2000242	GO:2000242	negative regulation of reproductive process	4/487	60/18866	0.0691036	0.41719	0.37917	ASTL/NPR2/WNT5A/FBXO43	4
GO:0090218	GO:0090218	positive regulation of lipid kinase activity	3/487	37/18866	0.0696278	0.41719	0.37917	F2/FGF2/FPR2	3
GO:0090322	GO:0090322	regulation of superoxide metabolic process	3/487	37/18866	0.0696278	0.41719	0.37917	GCH1/ITGAM/FPR2	3
GO:0002031	GO:0002031	G protein-coupled receptor internalization	2/487	17/18866	0.0700599	0.41719	0.37917	APLN/ARR3	2
GO:0003128	GO:0003128	heart field specification	2/487	17/18866	0.0700599	0.41719	0.37917	WNT5A/WNT11	2
GO:0003184	GO:0003184	pulmonary valve morphogenesis	2/487	17/18866	0.0700599	0.41719	0.37917	NOS3/SMAD6	2
GO:0009312	GO:0009312	oligosaccharide biosynthetic process	2/487	17/18866	0.0700599	0.41719	0.37917	FBP1/FUT8	2
GO:0016045	GO:0016045	detection of bacterium	2/487	17/18866	0.0700599	0.41719	0.37917	NOD1/TLR1	2
GO:0016246	GO:0016246	RNA interference	2/487	17/18866	0.0700599	0.41719	0.37917	DROSHA/XPO5	2
GO:0030322	GO:0030322	stabilization of membrane potential	2/487	17/18866	0.0700599	0.41719	0.37917	KCNK5/KCNK6	2
GO:0030575	GO:0030575	nuclear body organization	2/487	17/18866	0.0700599	0.41719	0.37917	DYRK3/HABP4	2
GO:0031649	GO:0031649	heat generation	2/487	17/18866	0.0700599	0.41719	0.37917	IL1A/APLN	2
GO:0034384	GO:0034384	high-density lipoprotein particle clearance	2/487	17/18866	0.0700599	0.41719	0.37917	APOA1/APOM	2
GO:0035020	GO:0035020	regulation of Rac protein signal transduction	2/487	17/18866	0.0700599	0.41719	0.37917	ARHGAP24/CADM4	2
GO:0043968	GO:0043968	histone H2A acetylation	2/487	17/18866	0.0700599	0.41719	0.37917	ACTL6A/NAA40	2
GO:0046068	GO:0046068	cGMP metabolic process	2/487	17/18866	0.0700599	0.41719	0.37917	NPR2/RORA	2
GO:0070166	GO:0070166	enamel mineralization	2/487	17/18866	0.0700599	0.41719	0.37917	AMELX/FOXO1	2
GO:1904948	GO:1904948	midbrain dopaminergic neuron differentiation	2/487	17/18866	0.0700599	0.41719	0.37917	FZD1/WNT5A	2
GO:0051216	GO:0051216	cartilage development	9/487	197/18866	0.0701496	0.41719	0.37917	AMELX/CHADL/RARA/TRPV4/WNT5A/FGF2/SHOX2/WNT11/ZBTB16	9
GO:0002819	GO:0002819	regulation of adaptive immune response	8/487	168/18866	0.0702561	0.417243	0.379219	ALOX15/CD274/IL20RB/IL27RA/IL6ST/IL7R/RSAD2/PRKCZ	8
GO:0006919	GO:0006919	activation of cysteine-type endopeptidase activity involved in apoptotic process	5/487	86/18866	0.0716612	0.423822	0.385198	EGLN3/NOD1/DLC1/NGFR/HIP1R	5
GO:0034637	GO:0034637	cellular carbohydrate biosynthetic process	5/487	86/18866	0.0716612	0.423822	0.385198	B3GNT7/FBP1/IMPA2/PGP/PDXP	5
GO:0097756	GO:0097756	negative regulation of blood vessel diameter	5/487	86/18866	0.0716612	0.423822	0.385198	ARHGAP42/HTR7/KCNMB4/OXTR/APLN	5
GO:0003007	GO:0003007	heart morphogenesis	11/487	258/18866	0.0721201	0.425947	0.387129	ACVR1/ADGRG6/FZD1/NOS3/RARA/SMAD6/WNT5A/DLC1/SHOX2/VANGL2/WNT11	11
GO:0010574	GO:0010574	regulation of vascular endothelial growth factor production	4/487	61/18866	0.0725181	0.427514	0.388554	IL1A/IL6ST/NOX1/RORA	4
GO:0001938	GO:0001938	positive regulation of endothelial cell proliferation	6/487	113/18866	0.0725854	0.427514	0.388554	CDH13/ITGB3/LRG1/WNT5A/APLN/FGF2	6
GO:0048762	GO:0048762	mesenchymal cell differentiation	10/487	229/18866	0.0740688	0.434028	0.394474	ACVR1/AMELX/RGCC/SEMA4A/SPRED3/WNT5A/ALX1/WNT11/RANBP3L/SOX8	10
GO:0051648	GO:0051648	vesicle localization	10/487	229/18866	0.0740688	0.434028	0.394474	ACTN4/BLOC1S4/KIF13A/PREB/SAR1B/SYBU/SYN3/COL7A1/SHROOM2/PRKCZ	10
GO:0032689	GO:0032689	negative regulation of interferon-gamma production	3/487	38/18866	0.0742085	0.434028	0.394474	CD274/IL20RB/RARA	3
GO:1903523	GO:1903523	negative regulation of blood circulation	3/487	38/18866	0.0742085	0.434028	0.394474	ARHGAP42/RNLS/APLN	3
GO:2000403	GO:2000403	positive regulation of lymphocyte migration	3/487	38/18866	0.0742085	0.434028	0.394474	STK39/TNFSF14/WNT5A	3
GO:0001942	GO:0001942	hair follicle development	5/487	87/18866	0.0745035	0.434028	0.394474	SPINK5/WNT5A/NGFR/TGM3/VANGL2	5
GO:0051781	GO:0051781	positive regulation of cell division	5/487	87/18866	0.0745035	0.434028	0.394474	IL1A/PPBP/TAL1/FGF2/PDGFD	5
GO:0060291	GO:0060291	long-term synaptic potentiation	5/487	87/18866	0.0745035	0.434028	0.394474	ARC/ADCY1/ADCY8/NTRK2/PRKCZ	5
GO:0043087	GO:0043087	regulation of GTPase activity	18/487	481/18866	0.0749918	0.435968	0.396237	ADPRH/ARHGAP42/BCR/MAPRE2/MLST8/NCKAP1L/PREB/RGS16/TBC1D30/WNT5A/ARHGAP24/DLC1/TBC1D8B/THY1/WNT11/NTRK2/RANBP3L/RGS9	18
GO:1990748	GO:1990748	cellular detoxification	6/487	114/18866	0.0750403	0.435968	0.396237	GCH1/GPX1/NOS3/TP53INP1/APOM/TXNRD2	6
GO:1901888	GO:1901888	regulation of cell junction assembly	9/487	200/18866	0.0755005	0.436276	0.396517	FZD1/IKBKB/LRFN5/OXTR/SEMA4A/WNT5A/DLC1/THY1/NTRK2	9
GO:2000377	GO:2000377	regulation of reactive oxygen species metabolic process	9/487	200/18866	0.0755005	0.436276	0.396517	ALOX5/BCR/FOXO1/GCH1/HK2/ITGAM/PLIN5/F2/FPR2	9
GO:1901879	GO:1901879	regulation of protein depolymerization	5/487	88/18866	0.0774063	0.436276	0.396517	NES/TMOD1/TRPV4/PDXP/VIL1	5
GO:0021756	GO:0021756	striatum development	2/487	18/18866	0.0775108	0.436276	0.396517	SECISBP2/SLC7A11	2
GO:0033194	GO:0033194	response to hydroperoxide	2/487	18/18866	0.0775108	0.436276	0.396517	GPX1/TP53INP1	2
GO:0034199	GO:0034199	activation of protein kinase A activity	2/487	18/18866	0.0775108	0.436276	0.396517	ADCY1/ADCY8	2
GO:0034375	GO:0034375	high-density lipoprotein particle remodeling	2/487	18/18866	0.0775108	0.436276	0.396517	APOA1/APOM	2
GO:0035313	GO:0035313	wound healing, spreading of epidermal cells	2/487	18/18866	0.0775108	0.436276	0.396517	HBEGF/ARHGAP24	2
GO:0043011	GO:0043011	myeloid dendritic cell differentiation	2/487	18/18866	0.0775108	0.436276	0.396517	IRF4/DHRS2	2
GO:0045721	GO:0045721	negative regulation of gluconeogenesis	2/487	18/18866	0.0775108	0.436276	0.396517	CRY1/PGP	2
GO:0048268	GO:0048268	clathrin coat assembly	2/487	18/18866	0.0775108	0.436276	0.396517	FCHO2/HIP1R	2
GO:0048339	GO:0048339	paraxial mesoderm development	2/487	18/18866	0.0775108	0.436276	0.396517	WNT5A/WNT11	2
GO:0048557	GO:0048557	embryonic digestive tract morphogenesis	2/487	18/18866	0.0775108	0.436276	0.396517	RBPMS2/SHOX2	2
GO:0060192	GO:0060192	negative regulation of lipase activity	2/487	18/18866	0.0775108	0.436276	0.396517	APOA1/PLIN5	2
GO:0060457	GO:0060457	negative regulation of digestive system process	2/487	18/18866	0.0775108	0.436276	0.396517	OXTR/STK39	2
GO:0061298	GO:0061298	retina vasculature development in camera-type eye	2/487	18/18866	0.0775108	0.436276	0.396517	LRP5/RHOJ	2
GO:0070230	GO:0070230	positive regulation of lymphocyte apoptotic process	2/487	18/18866	0.0775108	0.436276	0.396517	CD274/WNT5A	2
GO:0071605	GO:0071605	monocyte chemotactic protein-1 production	2/487	18/18866	0.0775108	0.436276	0.396517	MCOLN2/TRPV4	2
GO:0071637	GO:0071637	regulation of monocyte chemotactic protein-1 production	2/487	18/18866	0.0775108	0.436276	0.396517	MCOLN2/TRPV4	2
GO:0090036	GO:0090036	regulation of protein kinase C signaling	2/487	18/18866	0.0775108	0.436276	0.396517	WNT5A/WNT11	2
GO:1902074	GO:1902074	response to salt	2/487	18/18866	0.0775108	0.436276	0.396517	MAPK13/RNLS	2
GO:2000369	GO:2000369	regulation of clathrin-dependent endocytosis	2/487	18/18866	0.0775108	0.436276	0.396517	BMP2K/HIP1R	2
GO:2001185	GO:2001185	regulation of CD8-positive, alpha-beta T cell activation	2/487	18/18866	0.0775108	0.436276	0.396517	CD274/NCKAP1L	2
GO:0006023	GO:0006023	aminoglycan biosynthetic process	6/487	115/18866	0.077542	0.436276	0.396517	B3GNT7/CHPF/CHST2/HS3ST5/HS3ST2/HS6ST2	6
GO:0015698	GO:0015698	inorganic anion transport	8/487	172/18866	0.0781265	0.43841	0.398457	CLIC6/LRRC8D/SLC20A2/SLC4A3/ANO9/NMUR1/SLC13A4/SFRP4	8
GO:0050806	GO:0050806	positive regulation of synaptic transmission	8/487	172/18866	0.0781265	0.43841	0.398457	ARC/OXTR/ADCY1/SYT9/ADCY8/CACNG5/NTRK2/PRKCZ	8
GO:0010453	GO:0010453	regulation of cell fate commitment	3/487	39/18866	0.0789195	0.439401	0.399357	WNT5A/FGF2/WNT11	3
GO:0016601	GO:0016601	Rac protein signal transduction	3/487	39/18866	0.0789195	0.439401	0.399357	CDH13/ARHGAP24/CADM4	3
GO:0030866	GO:0030866	cortical actin cytoskeleton organization	3/487	39/18866	0.0789195	0.439401	0.399357	IKBKB/NCKAP1L/VIL1	3
GO:0031076	GO:0031076	embryonic camera-type eye development	3/487	39/18866	0.0789195	0.439401	0.399357	NES/RARA/WNT5A	3
GO:0038179	GO:0038179	neurotrophin signaling pathway	3/487	39/18866	0.0789195	0.439401	0.399357	AKT1S1/NGFR/NTRK2	3
GO:0046329	GO:0046329	negative regulation of JNK cascade	3/487	39/18866	0.0789195	0.439401	0.399357	AMBP/KLHL31/SH3RF2	3
GO:0002237	GO:0002237	response to molecule of bacterial origin	14/487	356/18866	0.0791226	0.43976	0.399684	BCR/CD274/GCH1/IL1A/NOS3/PPBP/PTGIR/RARA/SMAD6/SPON2/TLR1/TLR9/WNT5A/CNR2	14
GO:0030595	GO:0030595	leukocyte chemotaxis	10/487	232/18866	0.0791898	0.43976	0.399684	ALOX5/IL17RC/NCKAP1L/PPBP/STK39/TNFSF14/TRPV4/WNT5A/FPR2/CNR2	10
GO:0046635	GO:0046635	positive regulation of alpha-beta T cell activation	4/487	63/18866	0.0795994	0.441462	0.40123	NCKAP1L/RARA/ZBTB16/PRKCZ	4
GO:0044262	GO:0044262	cellular carbohydrate metabolic process	12/487	294/18866	0.0802316	0.444004	0.40354	B3GNT7/CRY1/FBP1/FOXO1/HK2/IL6ST/IMPA2/PGP/PPIP5K1/RORA/MGAM/PDXP	12
GO:0022404	GO:0022404	molting cycle process	5/487	89/18866	0.0803693	0.444004	0.40354	SPINK5/WNT5A/NGFR/TGM3/VANGL2	5
GO:0022405	GO:0022405	hair cycle process	5/487	89/18866	0.0803693	0.444004	0.40354	SPINK5/WNT5A/NGFR/TGM3/VANGL2	5
GO:0051251	GO:0051251	positive regulation of lymphocyte activation	14/487	357/18866	0.0805156	0.444232	0.403748	CD274/IL1A/IL27RA/IL6ST/IL7R/NCKAP1L/RARA/TLR9/TMIGD2/TNFSF14/VNN1/THY1/ZBTB16/PRKCZ	14
GO:0050867	GO:0050867	positive regulation of cell activation	16/487	421/18866	0.0806184	0.444232	0.403748	CD274/IL1A/IL27RA/IL6ST/IL7R/ITGAM/NCKAP1L/RARA/TLR9/TMIGD2/TNFSF14/VNN1/WNT5A/THY1/ZBTB16/PRKCZ	16
GO:0043406	GO:0043406	positive regulation of MAP kinase activity	11/487	264/18866	0.0817185	0.44953	0.408563	ALK/LPAR1/MAP2K6/NOD1/STK39/TLR9/WNT5A/FGF2/VANGL2/PDGFD/PROK2	11
GO:0060828	GO:0060828	regulation of canonical Wnt signaling pathway	12/487	295/18866	0.0817902	0.44953	0.408563	CSNK1G3/FOXO1/FZD1/IFT20/LATS2/PRDM15/PSMD11/PSMD13/WNT5A/WNT11/ZNRF3/SFRP4	12
GO:0051099	GO:0051099	positive regulation of binding	8/487	174/18866	0.0822516	0.451486	0.410341	CDK9/IRF4/NCBP1/PYHIN1/RARA/SKI/WNT5A/HIP1R	8
GO:0030282	GO:0030282	bone mineralization	6/487	117/18866	0.082685	0.452112	0.41091	ACVR1/AHSG/ALOX15/ALOX5/BMP2K/WNT11	6
GO:0007050	GO:0007050	cell cycle arrest	10/487	234/18866	0.0827225	0.452112	0.41091	CDK5R1/CDK9/MAP2K6/MLST8/PLAGL1/RGCC/TBRG4/TP53INP1/WHAMMP3/E2F8	10
GO:0001885	GO:0001885	endothelial cell development	4/487	64/18866	0.0832642	0.452112	0.41091	GPX1/IKBKB/TNMD/COL22A1	4
GO:0005996	GO:0005996	monosaccharide metabolic process	12/487	296/18866	0.0833677	0.452112	0.41091	ALDOC/CRY1/ENO2/FBP1/FOXO1/FUT8/HK2/LRP5/OAS1/PGP/RORA/SLC2A3	12
GO:0030522	GO:0030522	intracellular receptor signaling pathway	11/487	265/18866	0.083392	0.452112	0.41091	ACTN4/ALOX15/CRABP2/CRY1/MAP2K6/NOD1/PLIN5/RARA/RORA/YWHAH/RORB	11
GO:0006029	GO:0006029	proteoglycan metabolic process	5/487	90/18866	0.083392	0.452112	0.41091	CANT1/CHPF/HS3ST5/HS6ST2/VANGL2	5
GO:0098773	GO:0098773	skin epidermis development	5/487	90/18866	0.083392	0.452112	0.41091	SPINK5/WNT5A/NGFR/TGM3/VANGL2	5
GO:0043001	GO:0043001	Golgi to plasma membrane protein transport	3/487	40/18866	0.0837574	0.452112	0.41091	GOLPH3L/KIF13A/RAB26	3
GO:0050892	GO:0050892	intestinal absorption	3/487	40/18866	0.0837574	0.452112	0.41091	APOA1/SLC2A5/VIL1	3
GO:0071453	GO:0071453	cellular response to oxygen levels	10/487	235/18866	0.0845245	0.452112	0.41091	ANGPT4/ATP6V1A/EGLN3/FOXO1/LPAR1/NOX1/PSMD11/PSMD13/RGCC/RORA	10
GO:0001696	GO:0001696	gastric acid secretion	2/487	19/18866	0.0851971	0.452112	0.41091	OXTR/HIP1R	2
GO:0002710	GO:0002710	negative regulation of T cell mediated immunity	2/487	19/18866	0.0851971	0.452112	0.41091	IL20RB/IL7R	2
GO:0002862	GO:0002862	negative regulation of inflammatory response to antigenic stimulus	2/487	19/18866	0.0851971	0.452112	0.41091	GPX1/IL20RB	2
GO:0010544	GO:0010544	negative regulation of platelet activation	2/487	19/18866	0.0851971	0.452112	0.41091	NOS3/F2	2
GO:0030011	GO:0030011	maintenance of cell polarity	2/487	19/18866	0.0851971	0.452112	0.41091	NCKAP1L/WNT11	2
GO:0032026	GO:0032026	response to magnesium ion	2/487	19/18866	0.0851971	0.452112	0.41091	FBP1/KCNA1	2
GO:0032674	GO:0032674	regulation of interleukin-5 production	2/487	19/18866	0.0851971	0.452112	0.41091	RARA/PRKCZ	2
GO:0032930	GO:0032930	positive regulation of superoxide anion generation	2/487	19/18866	0.0851971	0.452112	0.41091	ITGAM/FPR2	2
GO:0035089	GO:0035089	establishment of apical/basal cell polarity	2/487	19/18866	0.0851971	0.452112	0.41091	IFT20/WNT5A	2
GO:0035728	GO:0035728	response to hepatocyte growth factor	2/487	19/18866	0.0851971	0.452112	0.41091	GAB1/VIL1	2
GO:0036342	GO:0036342	post-anal tail morphogenesis	2/487	19/18866	0.0851971	0.452112	0.41091	WNT5A/VANGL2	2
GO:0061081	GO:0061081	positive regulation of myeloid leukocyte cytokine production involved in immune response	2/487	19/18866	0.0851971	0.452112	0.41091	SPON2/WNT5A	2
GO:0098543	GO:0098543	detection of other organism	2/487	19/18866	0.0851971	0.452112	0.41091	NOD1/TLR1	2
GO:0150146	GO:0150146	cell junction disassembly	2/487	19/18866	0.0851971	0.452112	0.41091	ITGAM/MAPRE2	2
GO:1902176	GO:1902176	negative regulation of oxidative stress-induced intrinsic apoptotic signaling pathway	2/487	19/18866	0.0851971	0.452112	0.41091	GPX1/VNN1	2
GO:0006805	GO:0006805	xenobiotic metabolic process	6/487	118/18866	0.0853261	0.452112	0.41091	ACAA1/CES1/CYP2E1/CYP2S1/CYP3A4/RORA	6
GO:0008543	GO:0008543	fibroblast growth factor receptor signaling pathway	6/487	118/18866	0.0853261	0.452112	0.41091	NCBP1/POLR2H/WNT5A/APLN/FGF2/NGFR	6
GO:0033559	GO:0033559	unsaturated fatty acid metabolic process	6/487	118/18866	0.0853261	0.452112	0.41091	ACAA1/ALOX15/ALOX5/CYP2E1/CYP2S1/GPX1	6
GO:0045682	GO:0045682	regulation of epidermis development	5/487	91/18866	0.0864742	0.455952	0.4144	NAB2/SPINK5/WNT5A/NGFR/SFRP4	5
GO:0060021	GO:0060021	roof of mouth development	5/487	91/18866	0.0864742	0.455952	0.4144	FZD1/SKI/WNT5A/ALX1/WNT11	5
GO:0097306	GO:0097306	cellular response to alcohol	5/487	91/18866	0.0864742	0.455952	0.4144	CES1/MLC1/TP53INP1/ADCY1/ADCY8	5
GO:0006979	GO:0006979	response to oxidative stress	17/487	458/18866	0.0865533	0.455952	0.4144	ALOX5/CYP2E1/FOXO1/FUT8/FZD1/GCH1/GPX1/MAPK13/NOS3/NOX1/TP53INP1/VNN1/MELK/TXNRD2/DHRS2/PDGFD/SLC7A11	17
GO:0007043	GO:0007043	cell-cell junction assembly	7/487	147/18866	0.0868876	0.455952	0.4144	ACTN4/IKBKB/MPP7/TLN2/TRPV4/GJC1/WNT11	7
GO:0051592	GO:0051592	response to calcium ion	7/487	147/18866	0.0868876	0.455952	0.4144	ALOX15/AMELX/KCNMB4/WNT5A/ADCY1/SYT9/ADCY8	7
GO:1904064	GO:1904064	positive regulation of cation transmembrane transport	7/487	147/18866	0.0868876	0.455952	0.4144	ACTN4/ARC/CALCR/F2/THY1/KCNA1/RGS9	7
GO:0010573	GO:0010573	vascular endothelial growth factor production	4/487	65/18866	0.0870106	0.455952	0.4144	IL1A/IL6ST/NOX1/RORA	4
GO:0032729	GO:0032729	positive regulation of interferon-gamma production	4/487	65/18866	0.0870106	0.455952	0.4144	BCL3/IL27RA/TLR9/WNT5A	4
GO:0032872	GO:0032872	regulation of stress-activated MAPK cascade	10/487	237/18866	0.0881999	0.460392	0.418435	AMBP/FOXO1/NOD1/NOX1/TLR9/TRPV4/WNT5A/KLHL31/SH3RF2/VANGL2	10
GO:0030324	GO:0030324	lung development	8/487	177/18866	0.0886764	0.460392	0.418435	CRISPLD2/DPPA4/NOS3/WNT5A/FGF2/VANGL2/WNT11/SLC7A11	8
GO:0006734	GO:0006734	NADH metabolic process	3/487	41/18866	0.0887191	0.460392	0.418435	ALDOC/ENO2/HK2	3
GO:0007212	GO:0007212	dopamine receptor signaling pathway	3/487	41/18866	0.0887191	0.460392	0.418435	ALK/GNA14/RGS9	3
GO:0035136	GO:0035136	forelimb morphogenesis	3/487	41/18866	0.0887191	0.460392	0.418435	CRABP2/SHOX2/ZBTB16	3
GO:0045494	GO:0045494	photoreceptor cell maintenance	3/487	41/18866	0.0887191	0.460392	0.418435	BBS12/IQCB1/RP1L1	3
GO:0072524	GO:0072524	pyridine-containing compound metabolic process	3/487	41/18866	0.0887191	0.460392	0.418435	RNLS/NNMT/PDXP	3
GO:2000826	GO:2000826	regulation of heart morphogenesis	3/487	41/18866	0.0887191	0.460392	0.418435	ACVR1/WNT5A/WNT11	3
GO:0008277	GO:0008277	regulation of G protein-coupled receptor signaling pathway	7/487	148/18866	0.0892953	0.46282	0.420642	CRY1/RGS16/APLN/ARR3/CALCR/F2/RGS9	7
GO:0009306	GO:0009306	protein secretion	17/487	462/18866	0.0918356	0.471773	0.428779	ALOX5/BTN3A1/CAPN10/GOLPH3L/IL1A/LRP5/PREB/RGCC/RHBDF1/RSAD2/SYBU/TLR1/TLR9/EXPH5/SYT9/ADCY8/CD22	17
GO:0040013	GO:0040013	negative regulation of locomotion	15/487	397/18866	0.0919315	0.471773	0.428779	ANGPT4/BCR/CD200R1/GPR173/IL27RA/PFN2/PTPRR/RGCC/SEMA4A/TP53INP1/WNT5A/DLC1/FGF2/THY1/WNT11	15
GO:0002532	GO:0002532	production of molecular mediator involved in inflammatory response	5/487	93/18866	0.0928149	0.471773	0.428779	ALOX5/IL17RC/F2/GBP5/IL1R2	5
GO:0061097	GO:0061097	regulation of protein tyrosine kinase activity	5/487	93/18866	0.0928149	0.471773	0.428779	HBEGF/NCAPG2/TAL1/THY1/NTRK2	5
GO:0001832	GO:0001832	blastocyst growth	2/487	20/18866	0.0931016	0.471773	0.428779	GINS4/NCAPG2	2
GO:0002726	GO:0002726	positive regulation of T cell cytokine production	2/487	20/18866	0.0931016	0.471773	0.428779	RSAD2/PRKCZ	2
GO:0003085	GO:0003085	negative regulation of systemic arterial blood pressure	2/487	20/18866	0.0931016	0.471773	0.428779	ARHGAP42/KCNK6	2
GO:0007252	GO:0007252	I-kappaB phosphorylation	2/487	20/18866	0.0931016	0.471773	0.428779	IKBKB/TLR9	2
GO:0010875	GO:0010875	positive regulation of cholesterol efflux	2/487	20/18866	0.0931016	0.471773	0.428779	APOA1/CES1	2
GO:0019373	GO:0019373	epoxygenase P450 pathway	2/487	20/18866	0.0931016	0.471773	0.428779	CYP2E1/CYP2S1	2
GO:0030903	GO:0030903	notochord development	2/487	20/18866	0.0931016	0.471773	0.428779	WNT5A/WNT11	2
GO:0032634	GO:0032634	interleukin-5 production	2/487	20/18866	0.0931016	0.471773	0.428779	RARA/PRKCZ	2
GO:0032793	GO:0032793	positive regulation of CREB transcription factor activity	2/487	20/18866	0.0931016	0.471773	0.428779	ADCY1/ADCY8	2
GO:0051767	GO:0051767	nitric-oxide synthase biosynthetic process	2/487	20/18866	0.0931016	0.471773	0.428779	MAP2K6/TLR9	2
GO:0051769	GO:0051769	regulation of nitric-oxide synthase biosynthetic process	2/487	20/18866	0.0931016	0.471773	0.428779	MAP2K6/TLR9	2
GO:0098703	GO:0098703	calcium ion import across plasma membrane	2/487	20/18866	0.0931016	0.471773	0.428779	TRPV4/CALCR	2
GO:0098884	GO:0098884	postsynaptic neurotransmitter receptor internalization	2/487	20/18866	0.0931016	0.471773	0.428779	ARC/ITGB3	2
GO:0140239	GO:0140239	postsynaptic endocytosis	2/487	20/18866	0.0931016	0.471773	0.428779	ARC/ITGB3	2
GO:0035592	GO:0035592	establishment of protein localization to extracellular region	17/487	463/18866	0.0931877	0.471773	0.428779	ALOX5/BTN3A1/CAPN10/GOLPH3L/IL1A/LRP5/PREB/RGCC/RHBDF1/RSAD2/SYBU/TLR1/TLR9/EXPH5/SYT9/ADCY8/CD22	17
GO:0120254	GO:0120254	olefinic compound metabolic process	6/487	121/18866	0.093525	0.471773	0.428779	ACAA1/ALOX15/ALOX5/CYP2E1/CYP2S1/GPX1	6
GO:0046006	GO:0046006	regulation of activated T cell proliferation	3/487	42/18866	0.0938011	0.471773	0.428779	CD274/IL27RA/TMIGD2	3
GO:0071470	GO:0071470	cellular response to osmotic stress	3/487	42/18866	0.0938011	0.471773	0.428779	LRRC8D/STK39/TRPV4	3
GO:1904037	GO:1904037	positive regulation of epithelial cell apoptotic process	3/487	42/18866	0.0938011	0.471773	0.428779	CAPN10/RGCC/SFRP4	3
GO:0030258	GO:0030258	lipid modification	11/487	271/18866	0.0938767	0.471773	0.428779	ACAA1/ALDH3A2/ALOX15/ALOX5/APOA1/CYP2E1/CYP3A4/IMPA2/PLIN5/SLA2/SGPP2	11
GO:0050803	GO:0050803	regulation of synapse structure or activity	10/487	240/18866	0.0938913	0.471773	0.428779	ARC/CDK5R1/FZD1/LRFN5/OXTR/SEMA4A/SYBU/WNT5A/NTRK2/SLC7A11	10
GO:0070302	GO:0070302	regulation of stress-activated protein kinase signaling cascade	10/487	240/18866	0.0938913	0.471773	0.428779	AMBP/FOXO1/NOD1/NOX1/TLR9/TRPV4/WNT5A/KLHL31/SH3RF2/VANGL2	10
GO:0035107	GO:0035107	appendage morphogenesis	7/487	150/18866	0.0942226	0.471775	0.428781	CRABP2/LRP5/SKI/WNT5A/ALX1/SHOX2/ZBTB16	7
GO:0035108	GO:0035108	limb morphogenesis	7/487	150/18866	0.0942226	0.471775	0.428781	CRABP2/LRP5/SKI/WNT5A/ALX1/SHOX2/ZBTB16	7
GO:0070665	GO:0070665	positive regulation of leukocyte proliferation	7/487	150/18866	0.0942226	0.471775	0.428781	CD274/IL1A/IL27RA/IL6ST/NCKAP1L/TLR9/TMIGD2	7
GO:0043550	GO:0043550	regulation of lipid kinase activity	4/487	67/18866	0.0947432	0.472721	0.42964	SLA2/F2/FGF2/FPR2	4
GO:0045123	GO:0045123	cellular extravasation	4/487	67/18866	0.0947432	0.472721	0.42964	BCR/IL27RA/THY1/PDGFD	4
GO:0050918	GO:0050918	positive chemotaxis	4/487	67/18866	0.0947432	0.472721	0.42964	CDH13/WNT5A/FGF2/FPR2	4
GO:0045216	GO:0045216	cell-cell junction organization	9/487	210/18866	0.0951018	0.473957	0.430764	ACTN4/CDH13/CDH4/IKBKB/MPP7/TLN2/TRPV4/GJC1/WNT11	9
GO:0006814	GO:0006814	sodium ion transport	10/487	241/18866	0.0958359	0.47706	0.433584	ACTN4/FXYD2/NOS3/SLC20A2/SLC5A12/STK39/YWHAH/FXYD7/SHROOM2/SLC13A4	10
GO:0097237	GO:0097237	cellular response to toxic substance	6/487	122/18866	0.0963491	0.479057	0.435399	GCH1/GPX1/NOS3/TP53INP1/APOM/TXNRD2	6
GO:0061041	GO:0061041	regulation of wound healing	7/487	151/18866	0.096742	0.480452	0.436667	ALOX5/HBEGF/NOS3/CADM4/F2/FGF2/VIL1	7
GO:0008361	GO:0008361	regulation of cell size	8/487	181/18866	0.0976833	0.483442	0.439384	AKT1S1/CDH4/CDK5R1/CRABP2/IL7R/SEMA4A/TRPV4/WNT5A	8
GO:0030323	GO:0030323	respiratory tube development	8/487	181/18866	0.0976833	0.483442	0.439384	CRISPLD2/DPPA4/NOS3/WNT5A/FGF2/VANGL2/WNT11/SLC7A11	8
GO:1905330	GO:1905330	regulation of morphogenesis of an epithelium	8/487	181/18866	0.0976833	0.483442	0.439384	FZD1/PSMD11/PSMD13/WNT5A/VANGL2/WNT11/ZNRF3/SOX8	8
GO:0099072	GO:0099072	regulation of postsynaptic membrane neurotransmitter receptor levels	4/487	68/18866	0.0987271	0.487363	0.442948	ARC/ITGB3/CACNG5/PRKCZ	4
GO:0002823	GO:0002823	negative regulation of adaptive immune response based on somatic recombination of immune receptors built from immunoglobulin superfamily domains	3/487	43/18866	0.099	0.487363	0.442948	IL20RB/IL27RA/IL7R	3
GO:0030517	GO:0030517	negative regulation of axon extension	3/487	43/18866	0.099	0.487363	0.442948	CDK5R1/SEMA4A/WNT5A	3
GO:0046717	GO:0046717	acid secretion	3/487	43/18866	0.099	0.487363	0.442948	CES1/OXTR/HIP1R	3
GO:0071466	GO:0071466	cellular response to xenobiotic stimulus	6/487	123/18866	0.0992183	0.487363	0.442948	ACAA1/CES1/CYP2E1/CYP2S1/CYP3A4/RORA	6
GO:0001837	GO:0001837	epithelial to mesenchymal transition	7/487	152/18866	0.0992984	0.487363	0.442948	ACVR1/AMELX/RGCC/SPRED3/WNT5A/ALX1/WNT11	7
GO:0051650	GO:0051650	establishment of vesicle localization	9/487	212/18866	0.0993471	0.487363	0.442948	ACTN4/BLOC1S4/KIF13A/PREB/SAR1B/SYBU/COL7A1/SHROOM2/PRKCZ	9
GO:0097194	GO:0097194	execution phase of apoptosis	5/487	95/18866	0.0993874	0.487363	0.442948	CAPN10/AIFM3/DLC1/DNASE2B/CASP12	5
GO:0002029	GO:0002029	desensitization of G protein-coupled receptor signaling pathway	2/487	21/18866	0.101208	0.489001	0.444437	APLN/ARR3	2
GO:0002693	GO:0002693	positive regulation of cellular extravasation	2/487	21/18866	0.101208	0.489001	0.444437	THY1/PDGFD	2
GO:0003177	GO:0003177	pulmonary valve development	2/487	21/18866	0.101208	0.489001	0.444437	NOS3/SMAD6	2
GO:0010801	GO:0010801	negative regulation of peptidyl-threonine phosphorylation	2/487	21/18866	0.101208	0.489001	0.444437	SPRED3/CADM4	2
GO:0016075	GO:0016075	rRNA catabolic process	2/487	21/18866	0.101208	0.489001	0.444437	DROSHA/EXOSC4	2
GO:0022401	GO:0022401	negative adaptation of signaling pathway	2/487	21/18866	0.101208	0.489001	0.444437	APLN/ARR3	2
GO:0043651	GO:0043651	linoleic acid metabolic process	2/487	21/18866	0.101208	0.489001	0.444437	ALOX15/ALOX5	2
GO:0060008	GO:0060008	Sertoli cell differentiation	2/487	21/18866	0.101208	0.489001	0.444437	RARA/SOX8	2
GO:0061162	GO:0061162	establishment of monopolar cell polarity	2/487	21/18866	0.101208	0.489001	0.444437	IFT20/WNT5A	2
GO:0071397	GO:0071397	cellular response to cholesterol	2/487	21/18866	0.101208	0.489001	0.444437	CES1/MLC1	2
GO:1902656	GO:1902656	calcium ion import into cytosol	2/487	21/18866	0.101208	0.489001	0.444437	TRPV4/CALCR	2
GO:1903204	GO:1903204	negative regulation of oxidative stress-induced neuron death	2/487	21/18866	0.101208	0.489001	0.444437	FZD1/SLC7A11	2
GO:2000047	GO:2000047	regulation of cell-cell adhesion mediated by cadherin	2/487	21/18866	0.101208	0.489001	0.444437	RGCC/WNT5A	2
GO:0045089	GO:0045089	positive regulation of innate immune response	9/487	213/18866	0.10151	0.489906	0.44526	HMGB3/IKBKB/PSMD11/PSMD13/PYHIN1/WNT5A/FPR2/GBP5/ZBP1	9
GO:0060070	GO:0060070	canonical Wnt signaling pathway	13/487	339/18866	0.102054	0.491246	0.446477	CSNK1G3/FOXO1/FZD1/IFT20/LATS2/LRP5/PRDM15/PSMD11/PSMD13/WNT5A/WNT11/ZNRF3/SFRP4	13
GO:0002688	GO:0002688	regulation of leukocyte chemotaxis	6/487	124/18866	0.102132	0.491246	0.446477	NCKAP1L/STK39/TNFSF14/TRPV4/WNT5A/FPR2	6
GO:0002698	GO:0002698	negative regulation of immune effector process	6/487	124/18866	0.102132	0.491246	0.446477	APOA1/BCR/IL20RB/IL7R/SPINK5/CD22	6
GO:1903034	GO:1903034	regulation of response to wounding	8/487	183/18866	0.102374	0.491856	0.447031	ALOX5/CNTF/HBEGF/NOS3/CADM4/F2/FGF2/VIL1	8
GO:0071692	GO:0071692	protein localization to extracellular region	17/487	470/18866	0.103006	0.494338	0.449288	ALOX5/BTN3A1/CAPN10/GOLPH3L/IL1A/LRP5/PREB/RGCC/RHBDF1/RSAD2/SYBU/TLR1/TLR9/EXPH5/SYT9/ADCY8/CD22	17
GO:0042593	GO:0042593	glucose homeostasis	10/487	245/18866	0.103851	0.497812	0.452445	ALOX5/CRY1/FOXO1/HK2/LRP5/OAS1/SYBU/TRPV4/NGFR/ADCY8	10
GO:0017145	GO:0017145	stem cell division	3/487	44/18866	0.104312	0.497812	0.452445	PRDM15/VANGL2/ZBTB16	3
GO:0032965	GO:0032965	regulation of collagen biosynthetic process	3/487	44/18866	0.104312	0.497812	0.452445	AMELX/RGCC/F2	3
GO:0035307	GO:0035307	positive regulation of protein dephosphorylation	3/487	44/18866	0.104312	0.497812	0.452445	CDCA2/SMPD1/DLC1	3
GO:0042088	GO:0042088	T-helper 1 type immune response	3/487	44/18866	0.104312	0.497812	0.452445	BCL3/IL27RA/SEMA4A	3
GO:0038061	GO:0038061	NIK/NF-kappaB signaling	8/487	184/18866	0.104766	0.49942	0.453906	ACTN4/ALK/BCL3/NOD1/PSMD11/PSMD13/TLR9/TNFSF14	8
GO:0033500	GO:0033500	carbohydrate homeostasis	10/487	246/18866	0.105914	0.50378	0.457869	ALOX5/CRY1/FOXO1/HK2/LRP5/OAS1/SYBU/TRPV4/NGFR/ADCY8	10
GO:0070374	GO:0070374	positive regulation of ERK1 and ERK2 cascade	9/487	215/18866	0.105916	0.50378	0.457869	ACKR3/ALOX15/NOD1/TRPV4/CALCR/FGF2/FPR2/PDGFD/PRKCZ	9
GO:0009880	GO:0009880	embryonic pattern specification	4/487	70/18866	0.106924	0.506722	0.460543	SMAD6/WNT5A/ZBTB16/MEOX1	4
GO:0043405	GO:0043405	regulation of MAP kinase activity	13/487	342/18866	0.107248	0.506722	0.460543	ALK/LPAR1/MAP2K6/NOD1/SMPD1/SPRED3/STK39/TLR9/WNT5A/FGF2/VANGL2/PDGFD/PROK2	13
GO:0002089	GO:0002089	lens morphogenesis in camera-type eye	2/487	22/18866	0.109501	0.506722	0.460543	SKI/SHROOM2	2
GO:0006071	GO:0006071	glycerol metabolic process	2/487	22/18866	0.109501	0.506722	0.460543	PGP/PDXP	2
GO:0006379	GO:0006379	mRNA cleavage	2/487	22/18866	0.109501	0.506722	0.460543	NCBP1/RNASE4	2
GO:0010888	GO:0010888	negative regulation of lipid storage	2/487	22/18866	0.109501	0.506722	0.460543	CES1/ITGB3	2
GO:0023058	GO:0023058	adaptation of signaling pathway	2/487	22/18866	0.109501	0.506722	0.460543	APLN/ARR3	2
GO:0030859	GO:0030859	polarized epithelial cell differentiation	2/487	22/18866	0.109501	0.506722	0.460543	IFT20/WNT5A	2
GO:0032928	GO:0032928	regulation of superoxide anion generation	2/487	22/18866	0.109501	0.506722	0.460543	ITGAM/FPR2	2
GO:0035024	GO:0035024	negative regulation of Rho protein signal transduction	2/487	22/18866	0.109501	0.506722	0.460543	ARHGAP42/DLC1	2
GO:0045624	GO:0045624	positive regulation of T-helper cell differentiation	2/487	22/18866	0.109501	0.506722	0.460543	RARA/PRKCZ	2
GO:0046058	GO:0046058	cAMP metabolic process	2/487	22/18866	0.109501	0.506722	0.460543	ADCY1/ADCY8	2
GO:0051000	GO:0051000	positive regulation of nitric-oxide synthase activity	2/487	22/18866	0.109501	0.506722	0.460543	GCH1/NOD1	2
GO:0051291	GO:0051291	protein heterooligomerization	2/487	22/18866	0.109501	0.506722	0.460543	CALHM3/RRM1	2
GO:0055093	GO:0055093	response to hyperoxia	2/487	22/18866	0.109501	0.506722	0.460543	FOXO1/NOX1	2
GO:0061339	GO:0061339	establishment or maintenance of monopolar cell polarity	2/487	22/18866	0.109501	0.506722	0.460543	IFT20/WNT5A	2
GO:0099633	GO:0099633	protein localization to postsynaptic specialization membrane	2/487	22/18866	0.109501	0.506722	0.460543	CACNG5/PRKCZ	2
GO:0099645	GO:0099645	neurotransmitter receptor localization to postsynaptic specialization membrane	2/487	22/18866	0.109501	0.506722	0.460543	CACNG5/PRKCZ	2
GO:1901798	GO:1901798	positive regulation of signal transduction by p53 class mediator	2/487	22/18866	0.109501	0.506722	0.460543	PYHIN1/SPRED3	2
GO:0001657	GO:0001657	ureteric bud development	5/487	98/18866	0.109671	0.506722	0.460543	RARA/SMAD6/FGF2/WNT11/SOX8	5
GO:0048010	GO:0048010	vascular endothelial growth factor receptor signaling pathway	5/487	98/18866	0.109671	0.506722	0.460543	ITGB3/NCKAP1L/SH2D2A/CADM4/TNMD	5
GO:0001974	GO:0001974	blood vessel remodeling	3/487	45/18866	0.109734	0.506722	0.460543	BCR/NOS3/TGM2	3
GO:0007520	GO:0007520	myoblast fusion	3/487	45/18866	0.109734	0.506722	0.460543	CDON/TNFSF14/ERVFRD-1	3
GO:0010677	GO:0010677	negative regulation of cellular carbohydrate metabolic process	3/487	45/18866	0.109734	0.506722	0.460543	CRY1/FBP1/PGP	3
GO:0032722	GO:0032722	positive regulation of chemokine production	3/487	45/18866	0.109734	0.506722	0.460543	MCOLN2/TLR9/TRPV4	3
GO:0043114	GO:0043114	regulation of vascular permeability	3/487	45/18866	0.109734	0.506722	0.460543	BCR/MYLK3/TRPV4	3
GO:0072583	GO:0072583	clathrin-dependent endocytosis	3/487	45/18866	0.109734	0.506722	0.460543	BMP2K/FCHO2/HIP1R	3
GO:0051785	GO:0051785	positive regulation of nuclear division	4/487	71/18866	0.111134	0.512107	0.465437	IL1A/LRP5/RGCC/WNT5A	4
GO:0001704	GO:0001704	formation of primary germ layer	6/487	127/18866	0.11114	0.512107	0.465437	ACVR1/ITGB3/TAL1/WNT5A/COL7A1/WNT11	6
GO:0043409	GO:0043409	negative regulation of MAPK cascade	8/487	187/18866	0.112126	0.516095	0.469061	AMBP/FOXO1/PRDM15/PTPRR/SMPD1/SPRED3/KLHL31/SH3RF2	8
GO:0010770	GO:0010770	positive regulation of cell morphogenesis involved in differentiation	7/487	157/18866	0.112628	0.516632	0.46955	APOA1/CDH4/CRABP2/CHODL/NGFR/SHOX2/NTRK2	7
GO:0007601	GO:0007601	visual perception	9/487	218/18866	0.112726	0.516632	0.46955	HSF4/NRL/PRPH2/RGS16/ARR3/GJC1/RGS9/RORB/RP1L1	9
GO:0007623	GO:0007623	circadian rhythm	9/487	218/18866	0.112726	0.516632	0.46955	CRY1/HTR7/RORA/ADCY1/HS3ST2/NGFR/NTRK2/PROK2/RORB	9
GO:0070661	GO:0070661	leukocyte proliferation	12/487	313/18866	0.113092	0.516632	0.46955	BTN3A1/CD274/IL1A/IL20RB/IL27RA/IL6ST/IL7R/NCKAP1L/TLR9/TMIGD2/TNFSF14/CD22	12
GO:1903532	GO:1903532	positive regulation of secretion by cell	12/487	313/18866	0.113092	0.516632	0.46955	CAPN10/GOLPH3L/IL1A/ITGAM/MAP2K6/OXTR/RGCC/SYBU/APLN/EXPH5/SYT9/ADCY8	12
GO:0062207	GO:0062207	regulation of pattern recognition receptor signaling pathway	5/487	99/18866	0.11321	0.516632	0.46955	IRF4/RSAD2/TLR1/TLR9/TREML4	5
GO:0072163	GO:0072163	mesonephric epithelium development	5/487	99/18866	0.11321	0.516632	0.46955	RARA/SMAD6/FGF2/WNT11/SOX8	5
GO:0072164	GO:0072164	mesonephric tubule development	5/487	99/18866	0.11321	0.516632	0.46955	RARA/SMAD6/FGF2/WNT11/SOX8	5
GO:0009636	GO:0009636	response to toxic substance	10/487	250/18866	0.114399	0.521504	0.473977	CES1/GCH1/GPX1/MT1H/NOS3/TP53INP1/APOM/TXNRD2/DHRS2/SLC7A11	10
GO:0009952	GO:0009952	anterior/posterior pattern specification	9/487	219/18866	0.115048	0.522803	0.475158	ARC/CDON/LRP5/SKI/WNT5A/ALX1/VANGL2/ZBTB16/MEOX1	9
GO:0050670	GO:0050670	regulation of lymphocyte proliferation	9/487	219/18866	0.115048	0.522803	0.475158	CD274/IL1A/IL20RB/IL27RA/IL6ST/NCKAP1L/TLR9/TMIGD2/CD22	9
GO:0014014	GO:0014014	negative regulation of gliogenesis	3/487	46/18866	0.115263	0.522803	0.475158	SKI/ASCL2/F2	3
GO:0017144	GO:0017144	drug metabolic process	3/487	46/18866	0.115263	0.522803	0.475158	CYP2E1/CYP2S1/CYP3A4	3
GO:0030203	GO:0030203	glycosaminoglycan metabolic process	7/487	158/18866	0.115403	0.522803	0.475158	B3GNT7/CHPF/CHST2/HS3ST5/FGF2/HS3ST2/HS6ST2	7
GO:0042440	GO:0042440	pigment metabolic process	4/487	72/18866	0.115418	0.522803	0.475158	AMBP/WNT5A/PMEL/SLC7A11	4
GO:0002702	GO:0002702	positive regulation of production of molecular mediator of immune response	5/487	100/18866	0.116802	0.527086	0.479051	RSAD2/SPON2/TLR9/WNT5A/PRKCZ	5
GO:0045666	GO:0045666	positive regulation of neuron differentiation	14/487	380/18866	0.116913	0.527086	0.479051	ALK/CDH4/CDON/CNTF/CRABP2/FZD1/LPAR1/RARA/TCF4/WNT5A/CHODL/NGFR/SHOX2/NTRK2	14
GO:0007163	GO:0007163	establishment or maintenance of cell polarity	9/487	220/18866	0.117397	0.527086	0.479051	IFT20/MPP7/NCKAP1L/PARVB/WNT5A/CAP2/VANGL2/WNT11/PRKCZ	9
GO:0006907	GO:0006907	pinocytosis	2/487	23/18866	0.117965	0.527086	0.479051	ACTN4/AHSG	2
GO:0031629	GO:0031629	synaptic vesicle fusion to presynaptic active zone membrane	2/487	23/18866	0.117965	0.527086	0.479051	STX19/SYT9	2
GO:0034063	GO:0034063	stress granule assembly	2/487	23/18866	0.117965	0.527086	0.479051	ATXN2/GRB7	2
GO:0035743	GO:0035743	CD4-positive, alpha-beta T cell cytokine production	2/487	23/18866	0.117965	0.527086	0.479051	RSAD2/PRKCZ	2
GO:0050860	GO:0050860	negative regulation of T cell receptor signaling pathway	2/487	23/18866	0.117965	0.527086	0.479051	SLA2/THY1	2
GO:0071404	GO:0071404	cellular response to low-density lipoprotein particle stimulus	2/487	23/18866	0.117965	0.527086	0.479051	CDH13/CES1	2
GO:1900017	GO:1900017	positive regulation of cytokine production involved in inflammatory response	2/487	23/18866	0.117965	0.527086	0.479051	IL17RC/GBP5	2
GO:1900273	GO:1900273	positive regulation of long-term synaptic potentiation	2/487	23/18866	0.117965	0.527086	0.479051	ADCY1/ADCY8	2
GO:0042742	GO:0042742	defense response to bacterium	13/487	348/18866	0.118099	0.527086	0.479051	BCL3/DROSHA/GBP2/GBP4/IL27RA/NOD1/PPBP/SPINK5/SPON2/TLR9/F2/FPR2/RNASE3	13
GO:0051092	GO:0051092	positive regulation of NF-kappaB transcription factor activity	7/487	159/18866	0.118212	0.527086	0.479051	ALK/IKBKB/NOD1/TLR9/WNT5A/PRKCZ/TRIML2	7
GO:1902107	GO:1902107	positive regulation of leukocyte differentiation	7/487	159/18866	0.118212	0.527086	0.479051	IL1A/IL7R/NCKAP1L/RARA/VNN1/ZBTB16/PRKCZ	7
GO:1902600	GO:1902600	proton transmembrane transport	7/487	159/18866	0.118212	0.527086	0.479051	ACTN4/ATP6V1A/ATP6V1F/COX5B/SLC2A9/C15orf48/SLC36A3	7
GO:0043434	GO:0043434	response to peptide hormone	16/487	447/18866	0.118609	0.528303	0.480157	AHSG/ATP6V1A/ATP6V1F/CAPN10/CRY1/FOXO1/GAB1/GGH/GPR173/LRP5/OXTR/TRPV4/ADCY1/GNRHR/ADCY8/PRKCZ	16
GO:0051048	GO:0051048	negative regulation of secretion	8/487	190/18866	0.11976	0.531824	0.483357	BCR/CRY1/OXTR/RGCC/RHBDF1/RSAD2/STK39/CD22	8
GO:0002709	GO:0002709	regulation of T cell mediated immunity	4/487	73/18866	0.119772	0.531824	0.483357	IL20RB/IL7R/RSAD2/PRKCZ	4
GO:0032944	GO:0032944	regulation of mononuclear cell proliferation	9/487	221/18866	0.119772	0.531824	0.483357	CD274/IL1A/IL20RB/IL27RA/IL6ST/NCKAP1L/TLR9/TMIGD2/CD22	9
GO:0044773	GO:0044773	mitotic DNA damage checkpoint	5/487	101/18866	0.120449	0.534274	0.485584	DONSON/PLAGL1/RGCC/HUS1B/E2F8	5
GO:0006953	GO:0006953	acute-phase response	3/487	47/18866	0.120894	0.534584	0.485866	AHSG/IL1A/F2	3
GO:0014075	GO:0014075	response to amine	3/487	47/18866	0.120894	0.534584	0.485866	OXTR/CNR2/RGS9	3
GO:0044088	GO:0044088	regulation of vacuole organization	3/487	47/18866	0.120894	0.534584	0.485866	ADPRH/ENO2/IFT20	3
GO:0030336	GO:0030336	negative regulation of cell migration	13/487	350/18866	0.121853	0.538016	0.488985	ANGPT4/BCR/CD200R1/GPR173/IL27RA/PFN2/PTPRR/RGCC/TP53INP1/DLC1/FGF2/THY1/WNT11	13
GO:0050953	GO:0050953	sensory perception of light stimulus	9/487	222/18866	0.122173	0.538016	0.488985	HSF4/NRL/PRPH2/RGS16/ARR3/GJC1/RGS9/RORB/RP1L1	9
GO:0071219	GO:0071219	cellular response to molecule of bacterial origin	9/487	222/18866	0.122173	0.538016	0.488985	BCR/CD274/IL1A/NOS3/PPBP/RARA/SPON2/TLR1/WNT5A	9
GO:0097529	GO:0097529	myeloid leukocyte migration	9/487	222/18866	0.122173	0.538016	0.488985	CD200R1/IL17RC/MCOLN2/NCKAP1L/PPBP/TRPV4/FPR2/IRAK4/PDGFD	9
GO:0051321	GO:0051321	meiotic cell cycle	10/487	254/18866	0.123256	0.542223	0.492809	MSH4/NPR2/PSMD13/RAD54L/STAG3/TUBG1/WNT5A/FBXO43/HUS1B/SMC1B	10
GO:0006766	GO:0006766	vitamin metabolic process	6/487	131/18866	0.123757	0.543869	0.494304	CYP3A4/MMAA/RBP1/SLC2A3/VNN1/PDXP	6
GO:0042326	GO:0042326	negative regulation of phosphorylation	17/487	484/18866	0.124503	0.544713	0.495071	AHSG/AKT1S1/AMBP/FBP1/FOXO1/LATS2/LRP5/PRDM15/PTPRR/SMAD6/SMPD1/SPRED3/CADM4/KLHL31/SH3RF2/THY1/PRKCZ	17
GO:0001759	GO:0001759	organ induction	2/487	24/18866	0.126586	0.544713	0.495071	WNT5A/WNT11	2
GO:0003181	GO:0003181	atrioventricular valve morphogenesis	2/487	24/18866	0.126586	0.544713	0.495071	ACVR1/SMAD6	2
GO:0021544	GO:0021544	subpallium development	2/487	24/18866	0.126586	0.544713	0.495071	SECISBP2/SLC7A11	2
GO:0030325	GO:0030325	adrenal gland development	2/487	24/18866	0.126586	0.544713	0.495071	APOA1/WNT11	2
GO:0032925	GO:0032925	regulation of activin receptor signaling pathway	2/487	24/18866	0.126586	0.544713	0.495071	ACVR1/SKI	2
GO:0034505	GO:0034505	tooth mineralization	2/487	24/18866	0.126586	0.544713	0.495071	AMELX/FOXO1	2
GO:0060444	GO:0060444	branching involved in mammary gland duct morphogenesis	2/487	24/18866	0.126586	0.544713	0.495071	LRP5/WNT5A	2
GO:0071294	GO:0071294	cellular response to zinc ion	2/487	24/18866	0.126586	0.544713	0.495071	MT1H/ZNF658	2
GO:0090103	GO:0090103	cochlea morphogenesis	2/487	24/18866	0.126586	0.544713	0.495071	WNT5A/VANGL2	2
GO:0090208	GO:0090208	positive regulation of triglyceride metabolic process	2/487	24/18866	0.126586	0.544713	0.495071	APOA1/PLIN5	2
GO:0090335	GO:0090335	regulation of brown fat cell differentiation	2/487	24/18866	0.126586	0.544713	0.495071	TRPV4/FNDC5	2
GO:0097186	GO:0097186	amelogenesis	2/487	24/18866	0.126586	0.544713	0.495071	AMELX/FOXO1	2
GO:0098581	GO:0098581	detection of external biotic stimulus	2/487	24/18866	0.126586	0.544713	0.495071	NOD1/TLR1	2
GO:0099500	GO:0099500	vesicle fusion to plasma membrane	2/487	24/18866	0.126586	0.544713	0.495071	STX19/SYT9	2
GO:0010799	GO:0010799	regulation of peptidyl-threonine phosphorylation	3/487	48/18866	0.126624	0.544713	0.495071	SPRED3/WNT5A/CADM4	3
GO:0051932	GO:0051932	synaptic transmission, GABAergic	3/487	48/18866	0.126624	0.544713	0.495071	OXTR/SYN3/CNR2	3
GO:0070169	GO:0070169	positive regulation of biomineral tissue development	3/487	48/18866	0.126624	0.544713	0.495071	ACVR1/ALOX5/AMELX	3
GO:0099637	GO:0099637	neurotransmitter receptor transport	3/487	48/18866	0.126624	0.544713	0.495071	ARC/ITGB3/CACNG5	3
GO:0110151	GO:0110151	positive regulation of biomineralization	3/487	48/18866	0.126624	0.544713	0.495071	ACVR1/ALOX5/AMELX	3
GO:1900271	GO:1900271	regulation of long-term synaptic potentiation	3/487	48/18866	0.126624	0.544713	0.495071	ARC/ADCY1/ADCY8	3
GO:0034612	GO:0034612	response to tumor necrosis factor	12/487	320/18866	0.126915	0.545304	0.495609	ACTN4/APOA1/GBP2/GCH1/IKBKB/KRT8/PSMD11/PSMD13/RORA/TNFRSF9/TNFSF14/CLIP3	12
GO:0010595	GO:0010595	positive regulation of endothelial cell migration	6/487	132/18866	0.127017	0.545304	0.495609	ANGPT4/ITGB3/NOS3/WNT5A/FGF2/RHOJ	6
GO:0002793	GO:0002793	positive regulation of peptide secretion	8/487	193/18866	0.127664	0.546984	0.497135	CAPN10/GOLPH3L/IL1A/RGCC/SYBU/APLN/EXPH5/ADCY8	8
GO:1903046	GO:1903046	meiotic cell cycle process	8/487	193/18866	0.127664	0.546984	0.497135	MSH4/PSMD13/RAD54L/STAG3/TUBG1/WNT5A/FBXO43/HUS1B	8
GO:0048872	GO:0048872	homeostasis of number of cells	10/487	256/18866	0.127821	0.547111	0.497251	BCR/DYRK3/IL20RB/IL7R/NCAPG2/NCKAP1L/NOS3/TAL1/TNFSF14/SLC7A11	10
GO:0061844	GO:0061844	antimicrobial humoral immune response mediated by antimicrobial peptide	4/487	75/18866	0.128689	0.549726	0.499628	PPBP/SPINK5/F2/RNASE3	4
GO:0086001	GO:0086001	cardiac muscle cell action potential	4/487	75/18866	0.128689	0.549726	0.499628	KCNJ5/NUP155/SLC4A3/GJC1	4
GO:0051494	GO:0051494	negative regulation of cytoskeleton organization	7/487	163/18866	0.129801	0.553369	0.502939	PFN2/SSH3/TMOD1/CLIP3/DLC1/VIL1/HIP1R	7
GO:0055088	GO:0055088	lipid homeostasis	7/487	163/18866	0.129801	0.553369	0.502939	APOA1/CES1/LRP5/MALL/RBP1/RORA/APOM	7
GO:0002367	GO:0002367	cytokine production involved in immune response	5/487	104/18866	0.131703	0.559086	0.508135	APOA1/RSAD2/SPON2/WNT5A/PRKCZ	5
GO:0010976	GO:0010976	positive regulation of neuron projection development	11/487	290/18866	0.13206	0.559086	0.508135	ALK/CDH4/CNTF/CRABP2/FZD1/LPAR1/WNT5A/CHODL/NGFR/SHOX2/NTRK2	11
GO:0007389	GO:0007389	pattern specification process	16/487	455/18866	0.132135	0.559086	0.508135	ACVR1/ARC/CDON/GPR161/ITGAM/LRP5/NEK8/SKI/SMAD6/WNT5A/ALX1/VANGL2/WNT11/ZBTB16/MEOX1/RFX4	16
GO:0002686	GO:0002686	negative regulation of leukocyte migration	3/487	49/18866	0.132449	0.559086	0.508135	BCR/CD200R1/IL27RA	3
GO:0007595	GO:0007595	lactation	3/487	49/18866	0.132449	0.559086	0.508135	HK2/OXTR/APLN	3
GO:0010171	GO:0010171	body morphogenesis	3/487	49/18866	0.132449	0.559086	0.508135	CDON/CRISPLD2/SKI	3
GO:0010712	GO:0010712	regulation of collagen metabolic process	3/487	49/18866	0.132449	0.559086	0.508135	AMELX/RGCC/F2	3
GO:0032663	GO:0032663	regulation of interleukin-2 production	3/487	49/18866	0.132449	0.559086	0.508135	IL1A/IL20RB/IRF4	3
GO:0070231	GO:0070231	T cell apoptotic process	3/487	49/18866	0.132449	0.559086	0.508135	CD274/IL7R/WNT5A	3
GO:0072348	GO:0072348	sulfur compound transport	3/487	49/18866	0.132449	0.559086	0.508135	LRRC8D/SLC13A4/SLC7A11	3
GO:0060415	GO:0060415	muscle tissue morphogenesis	4/487	76/18866	0.133249	0.561907	0.510699	FZD1/WNT5A/SHOX2/VANGL2	4
GO:0051235	GO:0051235	maintenance of location	12/487	324/18866	0.135221	0.565744	0.514186	APOA1/BCL3/CDS2/CES1/CRY1/HK2/ITGB3/MCOLN2/PLIN5/F2/FGF2/THY1	12
GO:0002092	GO:0002092	positive regulation of receptor internalization	2/487	25/18866	0.13535	0.565744	0.514186	APLN/SFRP4	2
GO:0008334	GO:0008334	histone mRNA metabolic process	2/487	25/18866	0.13535	0.565744	0.514186	EXOSC4/NCBP1	2
GO:0019400	GO:0019400	alditol metabolic process	2/487	25/18866	0.13535	0.565744	0.514186	PGP/PDXP	2
GO:0042537	GO:0042537	benzene-containing compound metabolic process	2/487	25/18866	0.13535	0.565744	0.514186	ACAA1/CYP2E1	2
GO:0045992	GO:0045992	negative regulation of embryonic development	2/487	25/18866	0.13535	0.565744	0.514186	GPR161/WNT5A	2
GO:0071677	GO:0071677	positive regulation of mononuclear cell migration	2/487	25/18866	0.13535	0.565744	0.514186	FPR2/PDGFD	2
GO:1905564	GO:1905564	positive regulation of vascular endothelial cell proliferation	2/487	25/18866	0.13535	0.565744	0.514186	APLN/FGF2	2
GO:2000311	GO:2000311	regulation of AMPA receptor activity	2/487	25/18866	0.13535	0.565744	0.514186	ARC/CACNG5	2
GO:1902414	GO:1902414	protein localization to cell junction	5/487	105/18866	0.135556	0.566051	0.514465	ACTN4/MPP7/WNT5A/CACNG5/PRKCZ	5
GO:0090501	GO:0090501	RNA phosphodiester bond hydrolysis	7/487	165/18866	0.135801	0.566523	0.514894	DROSHA/EXOSC4/NCBP1/REXO2/RNASE13/RNASE3/RNASE4	7
GO:0070371	GO:0070371	ERK1 and ERK2 cascade	12/487	325/18866	0.137343	0.571648	0.519552	ACKR3/ALOX15/NOD1/OXTR/PTPRR/SPRED3/TRPV4/CALCR/FGF2/FPR2/PDGFD/PRKCZ	12
GO:0030500	GO:0030500	regulation of bone mineralization	4/487	77/18866	0.137874	0.571648	0.519552	ACVR1/AHSG/ALOX5/BMP2K	4
GO:0032413	GO:0032413	negative regulation of ion transmembrane transporter activity	4/487	77/18866	0.137874	0.571648	0.519552	GPR35/STK39/TLR9/ANO9	4
GO:0070830	GO:0070830	bicellular tight junction assembly	4/487	77/18866	0.137874	0.571648	0.519552	ACTN4/IKBKB/MPP7/WNT11	4
GO:0010718	GO:0010718	positive regulation of epithelial to mesenchymal transition	3/487	50/18866	0.138367	0.571648	0.519552	ACVR1/RGCC/ALX1	3
GO:0019674	GO:0019674	NAD metabolic process	3/487	50/18866	0.138367	0.571648	0.519552	ALDOC/ENO2/HK2	3
GO:0032760	GO:0032760	positive regulation of tumor necrosis factor production	3/487	50/18866	0.138367	0.571648	0.519552	NOD1/SPON2/TLR9	3
GO:0045646	GO:0045646	regulation of erythrocyte differentiation	3/487	50/18866	0.138367	0.571648	0.519552	NCAPG2/NCKAP1L/TAL1	3
GO:0050873	GO:0050873	brown fat cell differentiation	3/487	50/18866	0.138367	0.571648	0.519552	LRG1/TRPV4/FNDC5	3
GO:0099054	GO:0099054	presynapse assembly	3/487	50/18866	0.138367	0.571648	0.519552	FZD1/LRFN5/WNT5A	3
GO:0009408	GO:0009408	response to heat	7/487	166/18866	0.138852	0.573098	0.52087	AKT1S1/IL1A/MLST8/NOS3/NUP155/TP53INP1/TRPV4	7
GO:0032414	GO:0032414	positive regulation of ion transmembrane transporter activity	5/487	106/18866	0.139459	0.573942	0.521637	ACTN4/ARC/STK39/KCNA1/RGS9	5
GO:0032611	GO:0032611	interleukin-1 beta production	5/487	106/18866	0.139459	0.573942	0.521637	APOA1/NOD1/PYHIN1/WNT5A/GBP5	5
GO:0071156	GO:0071156	regulation of cell cycle arrest	5/487	106/18866	0.139459	0.573942	0.521637	CDK5R1/CDK9/PLAGL1/RGCC/E2F8	5
GO:0050807	GO:0050807	regulation of synapse organization	9/487	229/18866	0.139698	0.574374	0.52203	ARC/CDK5R1/FZD1/LRFN5/OXTR/SEMA4A/WNT5A/NTRK2/SLC7A11	9
GO:0001818	GO:0001818	negative regulation of cytokine production	13/487	360/18866	0.141632	0.578569	0.525842	APOA1/BCL3/CD200R1/CD274/IL20RB/NCKAP1L/RARA/RGCC/RNF128/TLR9/F2/IL1R2/WNT11	13
GO:0070997	GO:0070997	neuron death	13/487	360/18866	0.141632	0.578569	0.525842	AKT1S1/CD200R1/CDK5R1/CNTF/DPYSL4/EGLN3/FZD1/ITGAM/NES/WNT5A/NGFR/NTRK2/SLC7A11	13
GO:0042129	GO:0042129	regulation of T cell proliferation	7/487	167/18866	0.141935	0.578569	0.525842	CD274/IL1A/IL20RB/IL27RA/IL6ST/NCKAP1L/TMIGD2	7
GO:0043900	GO:0043900	regulation of multi-organism process	4/487	78/18866	0.142563	0.578569	0.525842	ASTL/NPR2/OXTR/FAM170B	4
GO:0061045	GO:0061045	negative regulation of wound healing	4/487	78/18866	0.142563	0.578569	0.525842	ALOX5/NOS3/F2/FGF2	4
GO:0019730	GO:0019730	antimicrobial humoral response	6/487	137/18866	0.143926	0.578569	0.525842	BCL3/PPBP/SPINK5/SPON2/F2/RNASE3	6
GO:0030183	GO:0030183	B cell differentiation	6/487	137/18866	0.143926	0.578569	0.525842	BCL3/HMGB3/NCKAP1L/TLR9/LYL1/NHEJ1	6
GO:0001672	GO:0001672	regulation of chromatin assembly or disassembly	2/487	26/18866	0.144244	0.578569	0.525842	NAA40/TAL1	2
GO:0002068	GO:0002068	glandular epithelial cell development	2/487	26/18866	0.144244	0.578569	0.525842	RARA/WNT5A	2
GO:0003081	GO:0003081	regulation of systemic arterial blood pressure by renin-angiotensin	2/487	26/18866	0.144244	0.578569	0.525842	CES1/NOX1	2
GO:0003171	GO:0003171	atrioventricular valve development	2/487	26/18866	0.144244	0.578569	0.525842	ACVR1/SMAD6	2
GO:0008211	GO:0008211	glucocorticoid metabolic process	2/487	26/18866	0.144244	0.578569	0.525842	APOA1/YWHAH	2
GO:0019430	GO:0019430	removal of superoxide radicals	2/487	26/18866	0.144244	0.578569	0.525842	GCH1/NOS3	2
GO:0032743	GO:0032743	positive regulation of interleukin-2 production	2/487	26/18866	0.144244	0.578569	0.525842	IL1A/IRF4	2
GO:0042104	GO:0042104	positive regulation of activated T cell proliferation	2/487	26/18866	0.144244	0.578569	0.525842	IL27RA/TMIGD2	2
GO:0048643	GO:0048643	positive regulation of skeletal muscle tissue development	2/487	26/18866	0.144244	0.578569	0.525842	CDON/SHOX2	2
GO:0048843	GO:0048843	negative regulation of axon extension involved in axon guidance	2/487	26/18866	0.144244	0.578569	0.525842	SEMA4A/WNT5A	2
GO:0060706	GO:0060706	cell differentiation involved in embryonic placenta development	2/487	26/18866	0.144244	0.578569	0.525842	KRT8/E2F8	2
GO:0071377	GO:0071377	cellular response to glucagon stimulus	2/487	26/18866	0.144244	0.578569	0.525842	ADCY1/ADCY8	2
GO:1904861	GO:1904861	excitatory synapse assembly	2/487	26/18866	0.144244	0.578569	0.525842	SEMA4A/WNT5A	2
GO:0099504	GO:0099504	synaptic vesicle cycle	8/487	199/18866	0.144257	0.578569	0.525842	CDK5R1/FCHO2/PFN2/PLD2/SYN3/ADCY1/STX19/SYT9	8
GO:0031113	GO:0031113	regulation of microtubule polymerization	3/487	51/18866	0.144372	0.578569	0.525842	CDK5R1/CLIP3/SLC39A12	3
GO:0035272	GO:0035272	exocrine system development	3/487	51/18866	0.144372	0.578569	0.525842	TGM2/IGSF3/RAB26	3
GO:0045912	GO:0045912	negative regulation of carbohydrate metabolic process	3/487	51/18866	0.144372	0.578569	0.525842	CRY1/FBP1/PGP	3
GO:0048146	GO:0048146	positive regulation of fibroblast proliferation	3/487	51/18866	0.144372	0.578569	0.525842	WNT5A/NGFR/PDGFD	3
GO:0065002	GO:0065002	intracellular protein transmembrane transport	3/487	51/18866	0.144372	0.578569	0.525842	BCR/TRAM2/ZFAND2B	3
GO:0071675	GO:0071675	regulation of mononuclear cell migration	3/487	51/18866	0.144372	0.578569	0.525842	TRPV4/FPR2/PDGFD	3
GO:0006631	GO:0006631	fatty acid metabolic process	14/487	396/18866	0.14712	0.585261	0.531925	ACAA1/ALDH3A2/ALOX15/ALOX5/APOA1/CES1/CYP2E1/CYP2S1/CYP3A4/GPAT2/GPX1/MMAA/PLIN5/ACSM5	14
GO:0010959	GO:0010959	regulation of metal ion transport	14/487	396/18866	0.14712	0.585261	0.531925	ACTN4/FXYD2/GPR35/NOS3/STK39/TLR9/YWHAH/CALCR/F2/FXYD7/KCNS2/THY1/KCNA1/RGS9	14
GO:0070482	GO:0070482	response to oxygen levels	14/487	396/18866	0.14712	0.585261	0.531925	ACTN4/ANGPT4/ATP6V1A/EGLN3/FOXO1/HK2/LPAR1/NOX1/OXTR/PSMD11/PSMD13/RGCC/RORA/ASCL2	14
GO:0016052	GO:0016052	carbohydrate catabolic process	8/487	200/18866	0.147122	0.585261	0.531925	ALDOC/ENO2/FBP1/FUT8/HK2/LRP5/NUP155/MGAM	8
GO:0006446	GO:0006446	regulation of translational initiation	4/487	79/18866	0.147314	0.585261	0.531925	EIF3B/HABP4/MIF4GD/NCBP1	4
GO:0043536	GO:0043536	positive regulation of blood vessel endothelial cell migration	4/487	79/18866	0.147314	0.585261	0.531925	ANGPT4/NOS3/FGF2/RHOJ	4
GO:0120192	GO:0120192	tight junction assembly	4/487	79/18866	0.147314	0.585261	0.531925	ACTN4/IKBKB/MPP7/WNT11	4
GO:0007229	GO:0007229	integrin-mediated signaling pathway	5/487	108/18866	0.14741	0.585261	0.531925	APOA1/FUT8/ITGAM/ITGB3/THY1	5
GO:0032526	GO:0032526	response to retinoic acid	5/487	108/18866	0.14741	0.585261	0.531925	RARA/WNT5A/WNT11/RORB/TRIML2	5
GO:0044774	GO:0044774	mitotic DNA integrity checkpoint	5/487	108/18866	0.14741	0.585261	0.531925	DONSON/PLAGL1/RGCC/HUS1B/E2F8	5
GO:0071356	GO:0071356	cellular response to tumor necrosis factor	11/487	297/18866	0.147985	0.586997	0.533502	ACTN4/APOA1/GBP2/IKBKB/KRT8/PSMD11/PSMD13/RORA/TNFRSF9/TNFSF14/CLIP3	11
GO:1903706	GO:1903706	regulation of hemopoiesis	17/487	498/18866	0.148451	0.588301	0.534688	DROSHA/HMGB3/IL1A/IL7R/IRF4/NCAPG2/NCKAP1L/PSMD11/PSMD13/RARA/SPINK5/TAL1/TLR9/VNN1/ZBTB16/PRKCZ/TMEM178A	17
GO:0001763	GO:0001763	morphogenesis of a branching structure	8/487	201/18866	0.150014	0.590249	0.536458	ACVR1/LRP5/TGM2/WNT5A/FGF2/SHOX2/VANGL2/SOX8	8
GO:0009266	GO:0009266	response to temperature stimulus	9/487	233/18866	0.150262	0.590249	0.536458	AKT1S1/FOXO1/IL1A/MLST8/NOS3/NUP155/TP53INP1/TRPV4/NGFR	9
GO:0060562	GO:0060562	epithelial tube morphogenesis	12/487	331/18866	0.150451	0.590249	0.536458	ACVR1/FZD1/LRP5/RARA/SKI/WNT5A/ALX1/DLC1/FGF2/VANGL2/WNT11/SOX8	12
GO:0002704	GO:0002704	negative regulation of leukocyte mediated immunity	3/487	52/18866	0.150461	0.590249	0.536458	BCR/IL20RB/IL7R	3
GO:0003179	GO:0003179	heart valve morphogenesis	3/487	52/18866	0.150461	0.590249	0.536458	ACVR1/NOS3/SMAD6	3
GO:0010883	GO:0010883	regulation of lipid storage	3/487	52/18866	0.150461	0.590249	0.536458	CES1/ITGB3/PLIN5	3
GO:0032330	GO:0032330	regulation of chondrocyte differentiation	3/487	52/18866	0.150461	0.590249	0.536458	CHADL/SHOX2/ZBTB16	3
GO:0048260	GO:0048260	positive regulation of receptor-mediated endocytosis	3/487	52/18866	0.150461	0.590249	0.536458	APLN/HIP1R/SFRP4	3
GO:0051445	GO:0051445	regulation of meiotic cell cycle	3/487	52/18866	0.150461	0.590249	0.536458	NPR2/WNT5A/FBXO43	3
GO:0090329	GO:0090329	regulation of DNA-dependent DNA replication	3/487	52/18866	0.150461	0.590249	0.536458	DONSON/METTL4/E2F8	3
GO:1903557	GO:1903557	positive regulation of tumor necrosis factor superfamily cytokine production	3/487	52/18866	0.150461	0.590249	0.536458	NOD1/SPON2/TLR9	3
GO:1901653	GO:1901653	cellular response to peptide	14/487	398/18866	0.15117	0.591447	0.537547	AHSG/ATP6V1A/ATP6V1F/CAPN10/FOXO1/GAB1/GPR173/NOD1/ADCY1/FPR2/GNRHR/NGFR/ADCY8/PRKCZ	14
GO:0032874	GO:0032874	positive regulation of stress-activated MAPK cascade	7/487	170/18866	0.151382	0.591447	0.537547	NOD1/NOX1/TLR9/TRPV4/WNT5A/SH3RF2/VANGL2	7
GO:0006939	GO:0006939	smooth muscle contraction	5/487	109/18866	0.151457	0.591447	0.537547	ARHGAP42/HTR7/OXTR/NMUR1/PROK2	5
GO:0014032	GO:0014032	neural crest cell development	4/487	80/18866	0.152126	0.591447	0.537547	ACVR1/SEMA4A/ALX1/SOX8	4
GO:1901224	GO:1901224	positive regulation of NIK/NF-kappaB signaling	4/487	80/18866	0.152126	0.591447	0.537547	ACTN4/NOD1/TLR9/TNFSF14	4
GO:2000146	GO:2000146	negative regulation of cell motility	13/487	365/18866	0.152139	0.591447	0.537547	ANGPT4/BCR/CD200R1/GPR173/IL27RA/PFN2/PTPRR/RGCC/TP53INP1/DLC1/FGF2/THY1/WNT11	13
GO:0002026	GO:0002026	regulation of the force of heart contraction	2/487	27/18866	0.153256	0.591447	0.537547	NOS3/APLN	2
GO:0003148	GO:0003148	outflow tract septum morphogenesis	2/487	27/18866	0.153256	0.591447	0.537547	RARA/SMAD6	2
GO:0006706	GO:0006706	steroid catabolic process	2/487	27/18866	0.153256	0.591447	0.537547	CYP3A4/YWHAH	2
GO:0006817	GO:0006817	phosphate ion transport	2/487	27/18866	0.153256	0.591447	0.537547	SLC20A2/SFRP4	2
GO:0034389	GO:0034389	lipid droplet organization	2/487	27/18866	0.153256	0.591447	0.537547	CDS2/PLIN5	2
GO:0036037	GO:0036037	CD8-positive, alpha-beta T cell activation	2/487	27/18866	0.153256	0.591447	0.537547	CD274/NCKAP1L	2
GO:0042481	GO:0042481	regulation of odontogenesis	2/487	27/18866	0.153256	0.591447	0.537547	AMELX/NGFR	2
GO:0048143	GO:0048143	astrocyte activation	2/487	27/18866	0.153256	0.591447	0.537547	CNTF/FPR2	2
GO:0050996	GO:0050996	positive regulation of lipid catabolic process	2/487	27/18866	0.153256	0.591447	0.537547	APOA1/PLIN5	2
GO:0072539	GO:0072539	T-helper 17 cell differentiation	2/487	27/18866	0.153256	0.591447	0.537547	IRF4/RORA	2
GO:1902473	GO:1902473	regulation of protein localization to synapse	2/487	27/18866	0.153256	0.591447	0.537547	WNT5A/PRKCZ	2
GO:1903203	GO:1903203	regulation of oxidative stress-induced neuron death	2/487	27/18866	0.153256	0.591447	0.537547	FZD1/SLC7A11	2
GO:0003012	GO:0003012	muscle system process	16/487	467/18866	0.15401	0.593821	0.539704	ARHGAP42/CDK9/FOXO1/HTR7/IL6ST/KCNJ5/MAP2K6/NOS3/NUP155/OXTR/TMOD1/GJC1/KCNJ12/NMUR1/KCNA1/PROK2	16
GO:0010038	GO:0010038	response to metal ion	13/487	366/18866	0.154289	0.594264	0.540107	ALOX15/AMELX/FBP1/GGH/IL1A/KCNMB4/MT1H/WNT5A/ZNF658/ADCY1/SYT9/ADCY8/KCNA1	13
GO:0072331	GO:0072331	signal transduction by p53 class mediator	10/487	267/18866	0.154526	0.594264	0.540107	BCL3/CDK5R1/DYRK3/PHLDA3/PLAGL1/PYHIN1/RGCC/SPRED3/TP53INP1/E2F8	10
GO:0097553	GO:0097553	calcium ion transmembrane import into cytosol	6/487	140/18866	0.154542	0.594264	0.540107	MCOLN2/TRPV4/CALCR/F2/FGF2/THY1	6
GO:0002821	GO:0002821	positive regulation of adaptive immune response	5/487	110/18866	0.15555	0.59514	0.540903	CD274/IL27RA/IL6ST/RSAD2/PRKCZ	5
GO:0006641	GO:0006641	triglyceride metabolic process	5/487	110/18866	0.15555	0.59514	0.540903	APOA1/CYP2E1/GPAT2/GPX1/PLIN5	5
GO:0071867	GO:0071867	response to monoamine	5/487	110/18866	0.15555	0.59514	0.540903	ALK/HTR7/RNLS/GNA14/RGS9	5
GO:0071869	GO:0071869	response to catecholamine	5/487	110/18866	0.15555	0.59514	0.540903	ALK/HTR7/RNLS/GNA14/RGS9	5
GO:0046486	GO:0046486	glycerolipid metabolic process	15/487	434/18866	0.15579	0.59514	0.540903	ALOX15/APOA1/CDS2/CYP2E1/GPAT2/GPX1/IMPA2/OSBPL5/PGP/PLD2/PLIN5/SLA2/FGF2/FPR2/PDXP	15
GO:0009311	GO:0009311	oligosaccharide metabolic process	3/487	53/18866	0.156631	0.59514	0.540903	FBP1/FUT8/MGAM	3
GO:0032731	GO:0032731	positive regulation of interleukin-1 beta production	3/487	53/18866	0.156631	0.59514	0.540903	NOD1/PYHIN1/WNT5A	3
GO:0045010	GO:0045010	actin nucleation	3/487	53/18866	0.156631	0.59514	0.540903	WHAMMP3/VIL1/HIP1R	3
GO:0045744	GO:0045744	negative regulation of G protein-coupled receptor signaling pathway	3/487	53/18866	0.156631	0.59514	0.540903	CRY1/APLN/ARR3	3
GO:0099172	GO:0099172	presynapse organization	3/487	53/18866	0.156631	0.59514	0.540903	FZD1/LRFN5/WNT5A	3
GO:0001937	GO:0001937	negative regulation of endothelial cell proliferation	4/487	81/18866	0.156997	0.59514	0.540903	ALOX5/RGCC/NGFR/TNMD	4
GO:0021766	GO:0021766	hippocampus development	4/487	81/18866	0.156997	0.59514	0.540903	ALK/CDK5R1/RARA/KCNA1	4
GO:0033238	GO:0033238	regulation of cellular amine metabolic process	4/487	81/18866	0.156997	0.59514	0.540903	ITGAM/PSMD11/PSMD13/SLC7A11	4
GO:0048194	GO:0048194	Golgi vesicle budding	4/487	81/18866	0.156997	0.59514	0.540903	GOLPH3L/PREB/SAR1B/COL7A1	4
GO:0050829	GO:0050829	defense response to Gram-negative bacterium	4/487	81/18866	0.156997	0.59514	0.540903	DROSHA/TLR9/F2/RNASE3	4
GO:0071158	GO:0071158	positive regulation of cell cycle arrest	4/487	81/18866	0.156997	0.59514	0.540903	CDK5R1/PLAGL1/RGCC/E2F8	4
GO:0032496	GO:0032496	response to lipopolysaccharide	12/487	334/18866	0.157244	0.595548	0.541274	BCR/CD274/GCH1/IL1A/NOS3/PPBP/PTGIR/RARA/SMAD6/SPON2/WNT5A/CNR2	12
GO:0006022	GO:0006022	aminoglycan metabolic process	7/487	172/18866	0.157839	0.596218	0.541883	B3GNT7/CHPF/CHST2/HS3ST5/FGF2/HS3ST2/HS6ST2	7
GO:0050714	GO:0050714	positive regulation of protein secretion	7/487	172/18866	0.157839	0.596218	0.541883	CAPN10/GOLPH3L/IL1A/RGCC/SYBU/EXPH5/ADCY8	7
GO:0070304	GO:0070304	positive regulation of stress-activated protein kinase signaling cascade	7/487	172/18866	0.157839	0.596218	0.541883	NOD1/NOX1/TLR9/TRPV4/WNT5A/SH3RF2/VANGL2	7
GO:1903708	GO:1903708	positive regulation of hemopoiesis	8/487	204/18866	0.158855	0.59937	0.544747	IL1A/IL7R/NCKAP1L/RARA/TAL1/VNN1/ZBTB16/PRKCZ	8
GO:0034440	GO:0034440	lipid oxidation	5/487	111/18866	0.159689	0.59937	0.544747	ACAA1/ALDH3A2/ALOX15/ALOX5/PLIN5	5
GO:0042303	GO:0042303	molting cycle	5/487	111/18866	0.159689	0.59937	0.544747	SPINK5/WNT5A/NGFR/TGM3/VANGL2	5
GO:0042633	GO:0042633	hair cycle	5/487	111/18866	0.159689	0.59937	0.544747	SPINK5/WNT5A/NGFR/TGM3/VANGL2	5
GO:0061387	GO:0061387	regulation of extent of cell growth	5/487	111/18866	0.159689	0.59937	0.544747	CDH4/CDK5R1/CRABP2/SEMA4A/WNT5A	5
GO:0002697	GO:0002697	regulation of immune effector process	16/487	470/18866	0.159769	0.59937	0.544747	APOA1/BCR/IL20RB/IL27RA/IL7R/IRF4/ITGAM/RARA/RSAD2/SPINK5/SPON2/TLR9/WNT5A/F2/CD22/PRKCZ	16
GO:0046777	GO:0046777	protein autophosphorylation	9/487	237/18866	0.16121	0.59937	0.544747	AATK/ALK/BCR/STK39/FRK/MELK/THY1/NTRK2/PDGFD	9
GO:0007224	GO:0007224	smoothened signaling pathway	6/487	142/18866	0.161806	0.59937	0.544747	CDON/GPR161/IFT20/RORA/SHOX2/RFX4	6
GO:0030879	GO:0030879	mammary gland development	6/487	142/18866	0.161806	0.59937	0.544747	GPX1/HK2/LRP5/OXTR/WNT5A/APLN	6
GO:0120193	GO:0120193	tight junction organization	4/487	82/18866	0.161925	0.59937	0.544747	ACTN4/IKBKB/MPP7/WNT11	4
GO:0003180	GO:0003180	aortic valve morphogenesis	2/487	28/18866	0.162374	0.59937	0.544747	NOS3/SMAD6	2
GO:0006760	GO:0006760	folic acid-containing compound metabolic process	2/487	28/18866	0.162374	0.59937	0.544747	GCH1/GGH	2
GO:0018146	GO:0018146	keratan sulfate biosynthetic process	2/487	28/18866	0.162374	0.59937	0.544747	B3GNT7/CHST2	2
GO:0031069	GO:0031069	hair follicle morphogenesis	2/487	28/18866	0.162374	0.59937	0.544747	NGFR/TGM3	2
GO:0031440	GO:0031440	regulation of mRNA 3'-end processing	2/487	28/18866	0.162374	0.59937	0.544747	CDK9/NCBP1	2
GO:0032958	GO:0032958	inositol phosphate biosynthetic process	2/487	28/18866	0.162374	0.59937	0.544747	PPIP5K1/FGF2	2
GO:0033598	GO:0033598	mammary gland epithelial cell proliferation	2/487	28/18866	0.162374	0.59937	0.544747	GPX1/WNT5A	2
GO:0034067	GO:0034067	protein localization to Golgi apparatus	2/487	28/18866	0.162374	0.59937	0.544747	IFT20/GBP5	2
GO:0034311	GO:0034311	diol metabolic process	2/487	28/18866	0.162374	0.59937	0.544747	GCH1/SGPP2	2
GO:0043901	GO:0043901	negative regulation of multi-organism process	2/487	28/18866	0.162374	0.59937	0.544747	ASTL/NPR2	2
GO:0044331	GO:0044331	cell-cell adhesion mediated by cadherin	2/487	28/18866	0.162374	0.59937	0.544747	RGCC/WNT5A	2
GO:0071450	GO:0071450	cellular response to oxygen radical	2/487	28/18866	0.162374	0.59937	0.544747	GCH1/NOS3	2
GO:0071451	GO:0071451	cellular response to superoxide	2/487	28/18866	0.162374	0.59937	0.544747	GCH1/NOS3	2
GO:0090383	GO:0090383	phagosome acidification	2/487	28/18866	0.162374	0.59937	0.544747	ATP6V1A/ATP6V1F	2
GO:0099560	GO:0099560	synaptic membrane adhesion	2/487	28/18866	0.162374	0.59937	0.544747	LRFN5/LRRC4C	2
GO:1902668	GO:1902668	negative regulation of axon guidance	2/487	28/18866	0.162374	0.59937	0.544747	SEMA4A/WNT5A	2
GO:0010043	GO:0010043	response to zinc ion	3/487	54/18866	0.162878	0.59937	0.544747	GGH/MT1H/ZNF658	3
GO:0010524	GO:0010524	positive regulation of calcium ion transport into cytosol	3/487	54/18866	0.162878	0.59937	0.544747	CALCR/F2/THY1	3
GO:0030834	GO:0030834	regulation of actin filament depolymerization	3/487	54/18866	0.162878	0.59937	0.544747	TMOD1/PDXP/VIL1	3
GO:0032623	GO:0032623	interleukin-2 production	3/487	54/18866	0.162878	0.59937	0.544747	IL1A/IL20RB/IRF4	3
GO:0001659	GO:0001659	temperature homeostasis	7/487	174/18866	0.164419	0.603483	0.548485	FOXO1/GPX1/IL1A/IRF4/MAP2K6/OXTR/APLN	7
GO:0010469	GO:0010469	regulation of signaling receptor activity	7/487	174/18866	0.164419	0.603483	0.548485	ARC/HBEGF/NCAPG2/TAL1/CALCR/CACNG5/RGS9	7
GO:0035725	GO:0035725	sodium ion transmembrane transport	7/487	174/18866	0.164419	0.603483	0.548485	ACTN4/FXYD2/SLC20A2/STK39/YWHAH/FXYD7/SHROOM2	7
GO:0008286	GO:0008286	insulin receptor signaling pathway	6/487	143/18866	0.165493	0.606901	0.551592	AHSG/ATP6V1A/ATP6V1F/FOXO1/GAB1/PRKCZ	6
GO:0050866	GO:0050866	negative regulation of cell activation	8/487	207/18866	0.167936	0.615335	0.559258	BCR/CD274/HMGB3/IL20RB/LRFN5/NOS3/F2/CNR2	8
GO:1903555	GO:1903555	regulation of tumor necrosis factor superfamily cytokine production	5/487	113/18866	0.168098	0.615398	0.559315	CD274/NOD1/RARA/SPON2/TLR9	5
GO:0001954	GO:0001954	positive regulation of cell-matrix adhesion	3/487	55/18866	0.169199	0.617373	0.56111	CDH13/THY1/PRKCZ	3
GO:0002931	GO:0002931	response to ischemia	3/487	55/18866	0.169199	0.617373	0.56111	HK2/MAP2K6/RNLS	3
GO:0050819	GO:0050819	negative regulation of coagulation	3/487	55/18866	0.169199	0.617373	0.56111	HS3ST5/NOS3/F2	3
GO:0046434	GO:0046434	organophosphate catabolic process	6/487	144/18866	0.169214	0.617373	0.56111	ENTPD3/GPX1/IMPA2/SMPD1/NUDT11/PDXP	6
GO:0070663	GO:0070663	regulation of leukocyte proliferation	9/487	240/18866	0.169667	0.618109	0.561779	CD274/IL1A/IL20RB/IL27RA/IL6ST/NCKAP1L/TLR9/TMIGD2/CD22	9
GO:0002440	GO:0002440	production of molecular mediator of immune response	11/487	306/18866	0.16985	0.618109	0.561779	APOA1/IL27RA/IL7R/RSAD2/SPINK5/SPON2/TLR9/TMIGD2/WNT5A/CD22/PRKCZ	11
GO:0070372	GO:0070372	regulation of ERK1 and ERK2 cascade	11/487	306/18866	0.16985	0.618109	0.561779	ACKR3/ALOX15/NOD1/PTPRR/SPRED3/TRPV4/CALCR/FGF2/FPR2/PDGFD/PRKCZ	11
GO:0071222	GO:0071222	cellular response to lipopolysaccharide	8/487	208/18866	0.171015	0.618888	0.562487	BCR/CD274/IL1A/NOS3/PPBP/RARA/SPON2/WNT5A	8
GO:0051047	GO:0051047	positive regulation of secretion	12/487	340/18866	0.17129	0.618888	0.562487	CAPN10/GOLPH3L/IL1A/ITGAM/MAP2K6/OXTR/RGCC/SYBU/APLN/EXPH5/SYT9/ADCY8	12
GO:0001773	GO:0001773	myeloid dendritic cell activation	2/487	29/18866	0.171586	0.618888	0.562487	IRF4/DHRS2	2
GO:0009435	GO:0009435	NAD biosynthetic process	2/487	29/18866	0.171586	0.618888	0.562487	RNLS/NNMT	2
GO:0032373	GO:0032373	positive regulation of sterol transport	2/487	29/18866	0.171586	0.618888	0.562487	APOA1/CES1	2
GO:0032376	GO:0032376	positive regulation of cholesterol transport	2/487	29/18866	0.171586	0.618888	0.562487	APOA1/CES1	2
GO:0048873	GO:0048873	homeostasis of number of cells within a tissue	2/487	29/18866	0.171586	0.618888	0.562487	IL20RB/NOS3	2
GO:0080154	GO:0080154	regulation of fertilization	2/487	29/18866	0.171586	0.618888	0.562487	ASTL/FAM170B	2
GO:0150117	GO:0150117	positive regulation of cell-substrate junction organization	2/487	29/18866	0.171586	0.618888	0.562487	MAPRE2/THY1	2
GO:2000108	GO:2000108	positive regulation of leukocyte apoptotic process	2/487	29/18866	0.171586	0.618888	0.562487	CD274/WNT5A	2
GO:0001510	GO:0001510	RNA methylation	4/487	84/18866	0.171946	0.618888	0.562487	METTL1/METTL2A/METTL4/RBM15B	4
GO:0014031	GO:0014031	mesenchymal cell development	4/487	84/18866	0.171946	0.618888	0.562487	ACVR1/SEMA4A/ALX1/SOX8	4
GO:0048864	GO:0048864	stem cell development	4/487	84/18866	0.171946	0.618888	0.562487	ACVR1/SEMA4A/ALX1/SOX8	4
GO:0032411	GO:0032411	positive regulation of transporter activity	5/487	114/18866	0.172366	0.619881	0.563389	ACTN4/ARC/STK39/KCNA1/RGS9	5
GO:0071322	GO:0071322	cellular response to carbohydrate stimulus	6/487	145/18866	0.172971	0.621533	0.564891	LRP5/MAP2K6/MAPK13/SLC2A5/SYBU/ADCY8	6
GO:0006977	GO:0006977	DNA damage response, signal transduction by p53 class mediator resulting in cell cycle arrest	3/487	56/18866	0.175589	0.626727	0.569611	PLAGL1/RGCC/E2F8	3
GO:0031295	GO:0031295	T cell costimulation	3/487	56/18866	0.175589	0.626727	0.569611	CD274/TMIGD2/TNFSF14	3
GO:0050732	GO:0050732	negative regulation of peptidyl-tyrosine phosphorylation	3/487	56/18866	0.175589	0.626727	0.569611	CADM4/THY1/PRKCZ	3
GO:0060688	GO:0060688	regulation of morphogenesis of a branching structure	3/487	56/18866	0.175589	0.626727	0.569611	WNT5A/SHOX2/SOX8	3
GO:0070228	GO:0070228	regulation of lymphocyte apoptotic process	3/487	56/18866	0.175589	0.626727	0.569611	CD274/IL7R/WNT5A	3
GO:0086002	GO:0086002	cardiac muscle cell action potential involved in contraction	3/487	56/18866	0.175589	0.626727	0.569611	KCNJ5/NUP155/GJC1	3
GO:0086065	GO:0086065	cell communication involved in cardiac conduction	3/487	56/18866	0.175589	0.626727	0.569611	KCNJ5/NUP155/GJC1	3
GO:1904645	GO:1904645	response to amyloid-beta	3/487	56/18866	0.175589	0.626727	0.569611	CALCR/FPR2/NGFR	3
GO:0001933	GO:0001933	negative regulation of protein phosphorylation	15/487	444/18866	0.176339	0.627697	0.570493	AKT1S1/AMBP/FOXO1/LATS2/LRP5/PRDM15/PTPRR/SMAD6/SMPD1/SPRED3/CADM4/KLHL31/SH3RF2/THY1/PRKCZ	15
GO:0006096	GO:0006096	glycolytic process	5/487	115/18866	0.176677	0.627697	0.570493	ALDOC/ENO2/FBP1/HK2/NUP155	5
GO:0051261	GO:0051261	protein depolymerization	5/487	115/18866	0.176677	0.627697	0.570493	NES/TMOD1/TRPV4/PDXP/VIL1	5
GO:0044344	GO:0044344	cellular response to fibroblast growth factor stimulus	6/487	146/18866	0.176762	0.627697	0.570493	NCBP1/POLR2H/WNT5A/APLN/FGF2/NGFR	6
GO:0006767	GO:0006767	water-soluble vitamin metabolic process	4/487	85/18866	0.177035	0.627697	0.570493	MMAA/SLC2A3/VNN1/PDXP	4
GO:0043154	GO:0043154	negative regulation of cysteine-type endopeptidase activity involved in apoptotic process	4/487	85/18866	0.177035	0.627697	0.570493	GPX1/TNFSF14/NGFR/VIL1	4
GO:0043297	GO:0043297	apical junction assembly	4/487	85/18866	0.177035	0.627697	0.570493	ACTN4/IKBKB/MPP7/WNT11	4
GO:0072384	GO:0072384	organelle transport along microtubule	4/487	85/18866	0.177035	0.627697	0.570493	BLOC1S4/KIF13A/SYBU/PRKCZ	4
GO:0060401	GO:0060401	cytosolic calcium ion transport	7/487	178/18866	0.177939	0.630245	0.572809	MCOLN2/TRPV4/CALCR/F2/FGF2/THY1/RGS9	7
GO:0006650	GO:0006650	glycerophospholipid metabolic process	12/487	343/18866	0.178538	0.630245	0.572809	ALOX15/APOA1/CDS2/GPAT2/IMPA2/OSBPL5/PGP/PLD2/SLA2/FGF2/FPR2/PDXP	12
GO:0000303	GO:0000303	response to superoxide	2/487	30/18866	0.180881	0.630245	0.572809	GCH1/NOS3	2
GO:0006362	GO:0006362	transcription elongation from RNA polymerase I promoter	2/487	30/18866	0.180881	0.630245	0.572809	POLR1A/POLR2H	2
GO:0010586	GO:0010586	miRNA metabolic process	2/487	30/18866	0.180881	0.630245	0.572809	DROSHA/XPO5	2
GO:0033688	GO:0033688	regulation of osteoblast proliferation	2/487	30/18866	0.180881	0.630245	0.572809	LRP5/SOX8	2
GO:0036475	GO:0036475	neuron death in response to oxidative stress	2/487	30/18866	0.180881	0.630245	0.572809	FZD1/SLC7A11	2
GO:0048147	GO:0048147	negative regulation of fibroblast proliferation	2/487	30/18866	0.180881	0.630245	0.572809	SKI/TP53INP1	2
GO:0051125	GO:0051125	regulation of actin nucleation	2/487	30/18866	0.180881	0.630245	0.572809	VIL1/HIP1R	2
GO:0060122	GO:0060122	inner ear receptor cell stereocilium organization	2/487	30/18866	0.180881	0.630245	0.572809	IFT20/VANGL2	2
GO:0061082	GO:0061082	myeloid leukocyte cytokine production	2/487	30/18866	0.180881	0.630245	0.572809	SPON2/WNT5A	2
GO:0062125	GO:0062125	regulation of mitochondrial gene expression	2/487	30/18866	0.180881	0.630245	0.572809	METTL4/RPUSD4	2
GO:0070168	GO:0070168	negative regulation of biomineral tissue development	2/487	30/18866	0.180881	0.630245	0.572809	AHSG/NOS3	2
GO:0070723	GO:0070723	response to cholesterol	2/487	30/18866	0.180881	0.630245	0.572809	CES1/MLC1	2
GO:0090162	GO:0090162	establishment of epithelial cell polarity	2/487	30/18866	0.180881	0.630245	0.572809	IFT20/WNT5A	2
GO:0090314	GO:0090314	positive regulation of protein targeting to membrane	2/487	30/18866	0.180881	0.630245	0.572809	CDK5R1/ITGAM	2
GO:0110150	GO:0110150	negative regulation of biomineralization	2/487	30/18866	0.180881	0.630245	0.572809	AHSG/NOS3	2
GO:1900027	GO:1900027	regulation of ruffle assembly	2/487	30/18866	0.180881	0.630245	0.572809	PFN2/ARHGAP24	2
GO:0006757	GO:0006757	ATP generation from ADP	5/487	116/18866	0.181027	0.630245	0.572809	ALDOC/ENO2/FBP1/HK2/NUP155	5
GO:0019748	GO:0019748	secondary metabolic process	3/487	57/18866	0.182045	0.630245	0.572809	WNT5A/PMEL/SLC7A11	3
GO:0045747	GO:0045747	positive regulation of Notch signaling pathway	3/487	57/18866	0.182045	0.630245	0.572809	BMP2K/IL6ST/NOS3	3
GO:0045840	GO:0045840	positive regulation of mitotic nuclear division	3/487	57/18866	0.182045	0.630245	0.572809	IL1A/LRP5/RGCC	3
GO:0046148	GO:0046148	pigment biosynthetic process	3/487	57/18866	0.182045	0.630245	0.572809	WNT5A/PMEL/SLC7A11	3
GO:0061178	GO:0061178	regulation of insulin secretion involved in cellular response to glucose stimulus	3/487	57/18866	0.182045	0.630245	0.572809	LRP5/SYBU/ADCY8	3
GO:0072431	GO:0072431	signal transduction involved in mitotic G1 DNA damage checkpoint	3/487	57/18866	0.182045	0.630245	0.572809	PLAGL1/RGCC/E2F8	3
GO:1902400	GO:1902400	intracellular signal transduction involved in G1 DNA damage checkpoint	3/487	57/18866	0.182045	0.630245	0.572809	PLAGL1/RGCC/E2F8	3
GO:1905517	GO:1905517	macrophage migration	3/487	57/18866	0.182045	0.630245	0.572809	CD200R1/MCOLN2/TRPV4	3
GO:0008589	GO:0008589	regulation of smoothened signaling pathway	4/487	86/18866	0.182175	0.630245	0.572809	GPR161/RORA/SHOX2/RFX4	4
GO:0045445	GO:0045445	myoblast differentiation	4/487	86/18866	0.182175	0.630245	0.572809	CDON/TNFSF14/RANBP3L/SOX8	4
GO:2000106	GO:2000106	regulation of leukocyte apoptotic process	4/487	86/18866	0.182175	0.630245	0.572809	CD274/IL7R/WNT5A/SLC7A11	4
GO:0045165	GO:0045165	cell fate commitment	10/487	278/18866	0.183786	0.63526	0.577367	ACVR1/CDON/IRF4/RARA/RORA/TAL1/WNT5A/FGF2/WNT11/SOX8	10
GO:0007409	GO:0007409	axonogenesis	16/487	482/18866	0.183922	0.63526	0.577367	CDH4/CDK5R1/CRABP2/EPHB6/GAB1/SEMA4A/WNT5A/ADCY1/CHODL/GRB7/NGFR/SHOX2/THY1/VANGL2/LRRC4C/NTRK2	16
GO:0045446	GO:0045446	endothelial cell differentiation	5/487	117/18866	0.185418	0.637848	0.579719	ACVR1/GPX1/IKBKB/TNMD/COL22A1	5
GO:0051341	GO:0051341	regulation of oxidoreductase activity	5/487	117/18866	0.185418	0.637848	0.579719	GCH1/IL1A/NOD1/NOS3/CNR2	5
GO:0072676	GO:0072676	lymphocyte migration	5/487	117/18866	0.185418	0.637848	0.579719	CD200R1/IL27RA/STK39/TNFSF14/WNT5A	5
GO:0071216	GO:0071216	cellular response to biotic stimulus	9/487	246/18866	0.187181	0.637848	0.579719	BCR/CD274/IL1A/NOS3/PPBP/RARA/SPON2/TLR1/WNT5A	9
GO:0051262	GO:0051262	protein tetramerization	4/487	87/18866	0.187364	0.637848	0.579719	MAT1A/RRM1/GBP5/KCNJ12	4
GO:0051453	GO:0051453	regulation of intracellular pH	4/487	87/18866	0.187364	0.637848	0.579719	ATP6V1A/ATP6V1F/NOX1/SLC4A3	4
GO:0060218	GO:0060218	hematopoietic stem cell differentiation	4/487	87/18866	0.187364	0.637848	0.579719	PSMD11/PSMD13/TAL1/MEOX1	4
GO:0097581	GO:0097581	lamellipodium organization	4/487	87/18866	0.187364	0.637848	0.579719	CDH13/PARVB/SPATA13/VIL1	4
GO:0000768	GO:0000768	syncytium formation by plasma membrane fusion	3/487	58/18866	0.188564	0.637848	0.579719	CDON/TNFSF14/ERVFRD-1	3
GO:0030042	GO:0030042	actin filament depolymerization	3/487	58/18866	0.188564	0.637848	0.579719	TMOD1/PDXP/VIL1	3
GO:0031294	GO:0031294	lymphocyte costimulation	3/487	58/18866	0.188564	0.637848	0.579719	CD274/TMIGD2/TNFSF14	3
GO:0035306	GO:0035306	positive regulation of dephosphorylation	3/487	58/18866	0.188564	0.637848	0.579719	CDCA2/SMPD1/DLC1	3
GO:0043551	GO:0043551	regulation of phosphatidylinositol 3-kinase activity	3/487	58/18866	0.188564	0.637848	0.579719	SLA2/FGF2/FPR2	3
GO:0140253	GO:0140253	cell-cell fusion	3/487	58/18866	0.188564	0.637848	0.579719	CDON/TNFSF14/ERVFRD-1	3
GO:0050769	GO:0050769	positive regulation of neurogenesis	16/487	485/18866	0.190231	0.637848	0.579719	ALK/CDH4/CDON/CNTF/CRABP2/FZD1/IL6ST/LPAR1/RARA/TCF4/WNT5A/CHODL/NGFR/SHOX2/NTRK2/SOX8	16
GO:0006363	GO:0006363	termination of RNA polymerase I transcription	2/487	31/18866	0.190249	0.637848	0.579719	POLR1A/POLR2H	2
GO:0010644	GO:0010644	cell communication by electrical coupling	2/487	31/18866	0.190249	0.637848	0.579719	GJC1/KCNA1	2
GO:0021772	GO:0021772	olfactory bulb development	2/487	31/18866	0.190249	0.637848	0.579719	SKI/WNT5A	2
GO:0032770	GO:0032770	positive regulation of monooxygenase activity	2/487	31/18866	0.190249	0.637848	0.579719	GCH1/NOD1	2
GO:0034368	GO:0034368	protein-lipid complex remodeling	2/487	31/18866	0.190249	0.637848	0.579719	APOA1/APOM	2
GO:0034369	GO:0034369	plasma lipoprotein particle remodeling	2/487	31/18866	0.190249	0.637848	0.579719	APOA1/APOM	2
GO:0034377	GO:0034377	plasma lipoprotein particle assembly	2/487	31/18866	0.190249	0.637848	0.579719	APOA1/APOM	2
GO:0045737	GO:0045737	positive regulation of cyclin-dependent protein serine/threonine kinase activity	2/487	31/18866	0.190249	0.637848	0.579719	CDK5R1/RGCC	2
GO:0045940	GO:0045940	positive regulation of steroid metabolic process	2/487	31/18866	0.190249	0.637848	0.579719	APOA1/CES1	2
GO:0045987	GO:0045987	positive regulation of smooth muscle contraction	2/487	31/18866	0.190249	0.637848	0.579719	OXTR/PROK2	2
GO:0048710	GO:0048710	regulation of astrocyte differentiation	2/487	31/18866	0.190249	0.637848	0.579719	IL6ST/F2	2
GO:0060292	GO:0060292	long-term synaptic depression	2/487	31/18866	0.190249	0.637848	0.579719	ARC/ADCY8	2
GO:0060325	GO:0060325	face morphogenesis	2/487	31/18866	0.190249	0.637848	0.579719	CRISPLD2/SKI	2
GO:0060914	GO:0060914	heart formation	2/487	31/18866	0.190249	0.637848	0.579719	WNT5A/WNT11	2
GO:0046879	GO:0046879	hormone secretion	11/487	314/18866	0.190526	0.637848	0.579719	ALOX5/CAPN10/CRY1/LRP5/SYBU/TRPV4/APLN/SCG5/SLC16A10/SYT9/ADCY8	11
GO:0048568	GO:0048568	embryonic organ development	15/487	451/18866	0.191495	0.637848	0.579719	ACVR1/BCR/KRT8/NES/RARA/RBPMS2/SOBP/TAL1/WNT5A/ALX1/ASCL2/SHOX2/VANGL2/WNT11/E2F8	15
GO:0097530	GO:0097530	granulocyte migration	6/487	150/18866	0.192255	0.637848	0.579719	IL17RC/MCOLN2/NCKAP1L/PPBP/TRPV4/IRAK4	6
GO:0014068	GO:0014068	positive regulation of phosphatidylinositol 3-kinase signaling	4/487	88/18866	0.192601	0.637848	0.579719	GAB1/F2/NTRK2/PDGFD	4
GO:0032410	GO:0032410	negative regulation of transporter activity	4/487	88/18866	0.192601	0.637848	0.579719	GPR35/STK39/TLR9/ANO9	4
GO:0070098	GO:0070098	chemokine-mediated signaling pathway	4/487	88/18866	0.192601	0.637848	0.579719	ACKR3/GPR35/PPBP/STK39	4
GO:0098656	GO:0098656	anion transmembrane transport	11/487	315/18866	0.193188	0.637848	0.579719	CLIC6/LRRC8D/SLC20A2/SLC4A3/SLC5A12/STK39/ANO9/SLC13A4/SLC16A10/SLC36A3/SLC7A11	11
GO:0001701	GO:0001701	in utero embryonic development	13/487	383/18866	0.193196	0.637848	0.579719	ACTL6A/ACVR1/FUT8/GINS4/KRT8/NASP/NCAPG2/NOS3/NSRP1/PTPRR/ASCL2/E2F8/SOX8	13
GO:0043281	GO:0043281	regulation of cysteine-type endopeptidase activity involved in apoptotic process	8/487	215/18866	0.193261	0.637848	0.579719	EGLN3/GPX1/NOD1/TNFSF14/DLC1/NGFR/VIL1/HIP1R	8
GO:0044282	GO:0044282	small molecule catabolic process	15/487	452/18866	0.19371	0.637848	0.579719	ACAA1/ALDH3A2/ALDOC/ENO2/ENTPD3/FUT8/HK2/IMPA2/LRP5/MAT1A/MMAA/NOS3/PLIN5/FGF2/PDXP	15
GO:0071706	GO:0071706	tumor necrosis factor superfamily cytokine production	5/487	119/18866	0.194313	0.637848	0.579719	CD274/NOD1/RARA/SPON2/TLR9	5
GO:1901222	GO:1901222	regulation of NIK/NF-kappaB signaling	5/487	119/18866	0.194313	0.637848	0.579719	ACTN4/BCL3/NOD1/TLR9/TNFSF14	5
GO:0019731	GO:0019731	antibacterial humoral response	3/487	59/18866	0.195142	0.637848	0.579719	SPINK5/SPON2/RNASE3	3
GO:0031102	GO:0031102	neuron projection regeneration	3/487	59/18866	0.195142	0.637848	0.579719	APOA1/CNTF/THY1	3
GO:0043030	GO:0043030	regulation of macrophage activation	3/487	59/18866	0.195142	0.637848	0.579719	LRFN5/RORA/WNT5A	3
GO:0045454	GO:0045454	cell redox homeostasis	3/487	59/18866	0.195142	0.637848	0.579719	GPX1/NOS3/TXNRD2	3
GO:0051289	GO:0051289	protein homotetramerization	3/487	59/18866	0.195142	0.637848	0.579719	MAT1A/GBP5/KCNJ12	3
GO:0072413	GO:0072413	signal transduction involved in mitotic cell cycle checkpoint	3/487	59/18866	0.195142	0.637848	0.579719	PLAGL1/RGCC/E2F8	3
GO:1902402	GO:1902402	signal transduction involved in mitotic DNA damage checkpoint	3/487	59/18866	0.195142	0.637848	0.579719	PLAGL1/RGCC/E2F8	3
GO:1902403	GO:1902403	signal transduction involved in mitotic DNA integrity checkpoint	3/487	59/18866	0.195142	0.637848	0.579719	PLAGL1/RGCC/E2F8	3
GO:0030177	GO:0030177	positive regulation of Wnt signaling pathway	7/487	183/18866	0.195474	0.637848	0.579719	CSNK1G3/PRDM15/PSMD11/PSMD13/SKI/WNT5A/SFRP4	7
GO:0000077	GO:0000077	DNA damage checkpoint	6/487	151/18866	0.196207	0.637848	0.579719	CRY1/DONSON/PLAGL1/RGCC/HUS1B/E2F8	6
GO:0006261	GO:0006261	DNA-dependent DNA replication	6/487	151/18866	0.196207	0.637848	0.579719	CDK9/DONSON/GINS4/METTL4/ORC5/E2F8	6
GO:1904892	GO:1904892	regulation of receptor signaling pathway via STAT	6/487	151/18866	0.196207	0.637848	0.579719	BCL3/CDK5R1/CNTF/IL6ST/IL7R/F2	6
GO:0032868	GO:0032868	response to insulin	10/487	283/18866	0.197867	0.637848	0.579719	AHSG/ATP6V1A/ATP6V1F/CAPN10/CRY1/FOXO1/GAB1/GGH/TRPV4/PRKCZ	10
GO:0014033	GO:0014033	neural crest cell differentiation	4/487	89/18866	0.197882	0.637848	0.579719	ACVR1/SEMA4A/ALX1/SOX8	4
GO:0051588	GO:0051588	regulation of neurotransmitter transport	5/487	120/18866	0.198816	0.637848	0.579719	ITGB3/KCNMB4/PFN2/ADCY1/SYT9	5
GO:0002724	GO:0002724	regulation of T cell cytokine production	2/487	32/18866	0.199681	0.637848	0.579719	RSAD2/PRKCZ	2
GO:0003176	GO:0003176	aortic valve development	2/487	32/18866	0.199681	0.637848	0.579719	NOS3/SMAD6	2
GO:0019359	GO:0019359	nicotinamide nucleotide biosynthetic process	2/487	32/18866	0.199681	0.637848	0.579719	RNLS/NNMT	2
GO:0019363	GO:0019363	pyridine nucleotide biosynthetic process	2/487	32/18866	0.199681	0.637848	0.579719	RNLS/NNMT	2
GO:0034367	GO:0034367	protein-containing complex remodeling	2/487	32/18866	0.199681	0.637848	0.579719	APOA1/APOM	2
GO:0044818	GO:0044818	mitotic G2/M transition checkpoint	2/487	32/18866	0.199681	0.637848	0.579719	DONSON/HUS1B	2
GO:0048730	GO:0048730	epidermis morphogenesis	2/487	32/18866	0.199681	0.637848	0.579719	NGFR/TGM3	2
GO:0048841	GO:0048841	regulation of axon extension involved in axon guidance	2/487	32/18866	0.199681	0.637848	0.579719	SEMA4A/WNT5A	2
GO:0050849	GO:0050849	negative regulation of calcium-mediated signaling	2/487	32/18866	0.199681	0.637848	0.579719	SLA2/CD22	2
GO:0051968	GO:0051968	positive regulation of synaptic transmission, glutamatergic	2/487	32/18866	0.199681	0.637848	0.579719	OXTR/CACNG5	2
GO:0060603	GO:0060603	mammary gland duct morphogenesis	2/487	32/18866	0.199681	0.637848	0.579719	LRP5/WNT5A	2
GO:0061036	GO:0061036	positive regulation of cartilage development	2/487	32/18866	0.199681	0.637848	0.579719	WNT5A/ZBTB16	2
GO:0070570	GO:0070570	regulation of neuron projection regeneration	2/487	32/18866	0.199681	0.637848	0.579719	CNTF/THY1	2
GO:1903959	GO:1903959	regulation of anion transmembrane transport	2/487	32/18866	0.199681	0.637848	0.579719	STK39/ANO9	2
GO:0006090	GO:0006090	pyruvate metabolic process	6/487	152/18866	0.200189	0.637848	0.579719	ALDOC/ENO2/FBP1/HK2/ME3/NUP155	6
GO:1903169	GO:1903169	regulation of calcium ion transmembrane transport	6/487	152/18866	0.200189	0.637848	0.579719	GPR35/TLR9/CALCR/F2/THY1/RGS9	6
GO:0043270	GO:0043270	positive regulation of ion transport	10/487	284/18866	0.200738	0.637848	0.579719	ACTN4/APOA1/ARC/MAP2K6/STK39/CALCR/F2/THY1/KCNA1/RGS9	10
GO:0006949	GO:0006949	syncytium formation	3/487	60/18866	0.201776	0.637848	0.579719	CDON/TNFSF14/ERVFRD-1	3
GO:0032515	GO:0032515	negative regulation of phosphoprotein phosphatase activity	3/487	60/18866	0.201776	0.637848	0.579719	IKBKB/NCKAP1L/SH3RF2	3
GO:0032732	GO:0032732	positive regulation of interleukin-1 production	3/487	60/18866	0.201776	0.637848	0.579719	NOD1/PYHIN1/WNT5A	3
GO:0035904	GO:0035904	aorta development	3/487	60/18866	0.201776	0.637848	0.579719	HECTD1/SMAD6/NGFR	3
GO:0043388	GO:0043388	positive regulation of DNA binding	3/487	60/18866	0.201776	0.637848	0.579719	IRF4/PYHIN1/SKI	3
GO:0048747	GO:0048747	muscle fiber development	3/487	60/18866	0.201776	0.637848	0.579719	GPX1/SKI/SHOX2	3
GO:0061900	GO:0061900	glial cell activation	3/487	60/18866	0.201776	0.637848	0.579719	CNTF/ITGAM/FPR2	3
GO:0061951	GO:0061951	establishment of protein localization to plasma membrane	3/487	60/18866	0.201776	0.637848	0.579719	GOLPH3L/KIF13A/RAB26	3
GO:0071806	GO:0071806	protein transmembrane transport	3/487	60/18866	0.201776	0.637848	0.579719	BCR/TRAM2/ZFAND2B	3
GO:0032465	GO:0032465	regulation of cytokinesis	4/487	90/18866	0.203207	0.637848	0.579719	KIF13A/RAB11FIP4/PDXP/E2F8	4
GO:0042058	GO:0042058	regulation of epidermal growth factor receptor signaling pathway	4/487	90/18866	0.203207	0.637848	0.579719	CDH13/HBEGF/RHBDF1/HIP1R	4
GO:1903351	GO:1903351	cellular response to dopamine	4/487	90/18866	0.203207	0.637848	0.579719	ALK/HTR7/GNA14/RGS9	4
GO:0007613	GO:0007613	memory	5/487	121/18866	0.203354	0.637848	0.579719	ARC/OXTR/ADCY1/ADCY8/PRKCZ	5
GO:0010906	GO:0010906	regulation of glucose metabolic process	5/487	121/18866	0.203354	0.637848	0.579719	CRY1/FBP1/FOXO1/PGP/RORA	5
GO:0032612	GO:0032612	interleukin-1 production	5/487	121/18866	0.203354	0.637848	0.579719	APOA1/NOD1/PYHIN1/WNT5A/GBP5	5
GO:0097485	GO:0097485	neuron projection guidance	10/487	285/18866	0.203627	0.637848	0.579719	CDH4/CDK5R1/DPYSL4/EPHB6/GAB1/SEMA4A/WNT5A/GRB7/NGFR/VANGL2	10
GO:0001678	GO:0001678	cellular glucose homeostasis	6/487	153/18866	0.204202	0.637848	0.579719	FOXO1/HK2/LRP5/SYBU/NGFR/ADCY8	6
GO:0002822	GO:0002822	regulation of adaptive immune response based on somatic recombination of immune receptors built from immunoglobulin superfamily domains	6/487	153/18866	0.204202	0.637848	0.579719	CD274/IL20RB/IL27RA/IL7R/RSAD2/PRKCZ	6
GO:0008203	GO:0008203	cholesterol metabolic process	6/487	153/18866	0.204202	0.637848	0.579719	APOA1/CES1/CYP3A4/LRP5/OSBPL5/SMPD1	6
GO:0030048	GO:0030048	actin filament-based movement	6/487	153/18866	0.204202	0.637848	0.579719	ACTN4/KCNJ5/NUP155/TMOD1/GJC1/VIL1	6
GO:0045834	GO:0045834	positive regulation of lipid metabolic process	6/487	153/18866	0.204202	0.637848	0.579719	APOA1/CES1/PLIN5/F2/FGF2/FPR2	6
GO:0071774	GO:0071774	response to fibroblast growth factor	6/487	153/18866	0.204202	0.637848	0.579719	NCBP1/POLR2H/WNT5A/APLN/FGF2/NGFR	6
GO:0071560	GO:0071560	cellular response to transforming growth factor beta stimulus	9/487	252/18866	0.205453	0.637848	0.579719	ACVR1/FUT8/LRG1/SKI/SMAD6/SPRED3/WNT5A/PDGFD/PRKCZ	9
GO:0051147	GO:0051147	regulation of muscle cell differentiation	7/487	186/18866	0.206313	0.637848	0.579719	CDK9/CDON/MYLK3/RBM38/RBPMS2/TNFSF14/SHOX2	7
GO:0051222	GO:0051222	positive regulation of protein transport	12/487	354/18866	0.206329	0.637848	0.579719	CAPN10/CDK5R1/GOLPH3L/IL1A/ITGAM/RGCC/SAR1B/SYBU/YWHAH/EXPH5/ADCY8/PRKCZ	12
GO:0006690	GO:0006690	icosanoid metabolic process	5/487	122/18866	0.207927	0.637848	0.579719	ALOX15/ALOX5/CYP2E1/CYP2S1/GPX1	5
GO:0010811	GO:0010811	positive regulation of cell-substrate adhesion	5/487	122/18866	0.207927	0.637848	0.579719	ALOX15/APOA1/CDH13/THY1/PRKCZ	5
GO:0043244	GO:0043244	regulation of protein-containing complex disassembly	5/487	122/18866	0.207927	0.637848	0.579719	NES/TMOD1/TRPV4/PDXP/VIL1	5
GO:0014706	GO:0014706	striated muscle tissue development	13/487	389/18866	0.207932	0.637848	0.579719	ACVR1/ASB2/CDON/GPX1/IFT20/MYLK3/RARA/SKI/WNT5A/FGF2/GJC1/SHOX2/SOX8	13
GO:0042733	GO:0042733	embryonic digit morphogenesis	3/487	61/18866	0.208462	0.637848	0.579719	LRP5/WNT5A/ZBTB16	3
GO:0015914	GO:0015914	phospholipid transport	4/487	91/18866	0.208574	0.637848	0.579719	APOA1/OSBPL5/ANO9/ATP8B2	4
GO:0030901	GO:0030901	midbrain development	4/487	91/18866	0.208574	0.637848	0.579719	FZD1/GNB4/WNT5A/YWHAH	4
GO:1903350	GO:1903350	response to dopamine	4/487	91/18866	0.208574	0.637848	0.579719	ALK/HTR7/GNA14/RGS9	4
GO:2000177	GO:2000177	regulation of neural precursor cell proliferation	4/487	91/18866	0.208574	0.637848	0.579719	CDON/FOXO1/NES/WNT5A	4
GO:0002861	GO:0002861	regulation of inflammatory response to antigenic stimulus	2/487	33/18866	0.209165	0.637848	0.579719	GPX1/IL20RB	2
GO:0006370	GO:0006370	7-methylguanosine mRNA capping	2/487	33/18866	0.209165	0.637848	0.579719	NCBP1/POLR2H	2
GO:0021988	GO:0021988	olfactory lobe development	2/487	33/18866	0.209165	0.637848	0.579719	SKI/WNT5A	2
GO:0035115	GO:0035115	embryonic forelimb morphogenesis	2/487	33/18866	0.209165	0.637848	0.579719	CRABP2/SHOX2	2
GO:0040020	GO:0040020	regulation of meiotic nuclear division	2/487	33/18866	0.209165	0.637848	0.579719	WNT5A/FBXO43	2
GO:0042339	GO:0042339	keratan sulfate metabolic process	2/487	33/18866	0.209165	0.637848	0.579719	B3GNT7/CHST2	2
GO:0042755	GO:0042755	eating behavior	2/487	33/18866	0.209165	0.637848	0.579719	BBS12/OXTR	2
GO:0043552	GO:0043552	positive regulation of phosphatidylinositol 3-kinase activity	2/487	33/18866	0.209165	0.637848	0.579719	FGF2/FPR2	2
GO:0044319	GO:0044319	wound healing, spreading of cells	2/487	33/18866	0.209165	0.637848	0.579719	HBEGF/ARHGAP24	2
GO:0045879	GO:0045879	negative regulation of smoothened signaling pathway	2/487	33/18866	0.209165	0.637848	0.579719	GPR161/RFX4	2
GO:0046627	GO:0046627	negative regulation of insulin receptor signaling pathway	2/487	33/18866	0.209165	0.637848	0.579719	AHSG/PRKCZ	2
GO:0090505	GO:0090505	epiboly involved in wound healing	2/487	33/18866	0.209165	0.637848	0.579719	HBEGF/ARHGAP24	2
GO:0120255	GO:0120255	olefinic compound biosynthetic process	2/487	33/18866	0.209165	0.637848	0.579719	ALOX15/ALOX5	2
GO:1901214	GO:1901214	regulation of neuron death	11/487	321/18866	0.209507	0.637848	0.579719	AKT1S1/CD200R1/CDK5R1/CNTF/EGLN3/FZD1/ITGAM/NES/WNT5A/NTRK2/SLC7A11	11
GO:0002285	GO:0002285	lymphocyte activation involved in immune response	7/487	187/18866	0.209976	0.637848	0.579719	BCL3/IL27RA/IRF4/RARA/RORA/SEMA4A/PRKCZ	7
GO:0061138	GO:0061138	morphogenesis of a branching epithelium	7/487	187/18866	0.209976	0.637848	0.579719	ACVR1/LRP5/TGM2/WNT5A/FGF2/VANGL2/SOX8	7
GO:0090092	GO:0090092	regulation of transmembrane receptor protein serine/threonine kinase signaling pathway	9/487	254/18866	0.211702	0.637848	0.579719	ACVR1/FZD1/LRG1/RBPMS2/SKI/SMAD6/SPRED3/WNT5A/SFRP4	9
GO:0009132	GO:0009132	nucleoside diphosphate metabolic process	6/487	155/18866	0.212312	0.637848	0.579719	ALDOC/ENO2/ENTPD3/FBP1/HK2/NUP155	6
GO:0048754	GO:0048754	branching morphogenesis of an epithelial tube	6/487	155/18866	0.212312	0.637848	0.579719	ACVR1/LRP5/WNT5A/FGF2/VANGL2/SOX8	6
GO:0070252	GO:0070252	actin-mediated cell contraction	5/487	123/18866	0.212533	0.637848	0.579719	KCNJ5/NUP155/TMOD1/GJC1/VIL1	5
GO:0042445	GO:0042445	hormone metabolic process	8/487	221/18866	0.213234	0.637848	0.579719	CES1/CRABP2/CYP2S1/CYP3A4/RBP1/SCG5/SLC16A10/DHRS2	8
GO:0051783	GO:0051783	regulation of nuclear division	7/487	188/18866	0.213663	0.637848	0.579719	CUL9/IL1A/LRP5/RGCC/WNT5A/FBXO43/PDXP	7
GO:0003333	GO:0003333	amino acid transmembrane transport	4/487	92/18866	0.213981	0.637848	0.579719	LRRC8D/SLC16A10/SLC36A3/SLC7A11	4
GO:0009953	GO:0009953	dorsal/ventral pattern formation	4/487	92/18866	0.213981	0.637848	0.579719	ACVR1/GPR161/SMAD6/RFX4	4
GO:0006470	GO:0006470	protein dephosphorylation	11/487	323/18866	0.215074	0.637848	0.579719	CDCA2/IKBKB/NCKAP1L/PGP/PTPRR/SMPD1/SSH3/DLC1/PDXP/SH3RF2/PPP2R2B	11
GO:0009914	GO:0009914	hormone transport	11/487	323/18866	0.215074	0.637848	0.579719	ALOX5/CAPN10/CRY1/LRP5/SYBU/TRPV4/APLN/SCG5/SLC16A10/SYT9/ADCY8	11
GO:0010803	GO:0010803	regulation of tumor necrosis factor-mediated signaling pathway	3/487	62/18866	0.215196	0.637848	0.579719	APOA1/IKBKB/CLIP3	3
GO:0030888	GO:0030888	regulation of B cell proliferation	3/487	62/18866	0.215196	0.637848	0.579719	NCKAP1L/TLR9/CD22	3
GO:0048857	GO:0048857	neural nucleus development	3/487	62/18866	0.215196	0.637848	0.579719	CDK5R1/GNB4/YWHAH	3
GO:0055081	GO:0055081	anion homeostasis	3/487	62/18866	0.215196	0.637848	0.579719	APOA1/SFRP4/SLC7A11	3
GO:0070527	GO:0070527	platelet aggregation	3/487	62/18866	0.215196	0.637848	0.579719	BLOC1S4/ITGB3/SLC7A11	3
GO:0140115	GO:0140115	export across plasma membrane	3/487	62/18866	0.215196	0.637848	0.579719	FXYD2/KCNK5/RGS9	3
GO:0010633	GO:0010633	negative regulation of epithelial cell migration	5/487	124/18866	0.217172	0.637848	0.579719	ANGPT4/PFN2/PTPRR/RGCC/FGF2	5
GO:0046031	GO:0046031	ADP metabolic process	5/487	124/18866	0.217172	0.637848	0.579719	ALDOC/ENO2/FBP1/HK2/NUP155	5
GO:0051101	GO:0051101	regulation of DNA binding	5/487	124/18866	0.217172	0.637848	0.579719	BCL3/HABP4/IRF4/PYHIN1/SKI	5
GO:0043534	GO:0043534	blood vessel endothelial cell migration	7/487	189/18866	0.217373	0.637848	0.579719	ANGPT4/APOA1/GPX1/NOS3/RGCC/FGF2/RHOJ	7
GO:0000280	GO:0000280	nuclear division	14/487	428/18866	0.218648	0.637848	0.579719	CUL9/IL1A/KIFC1/LRP5/MSH4/NCAPG2/PSMD13/RAD54L/RGCC/STAG3/TUBG1/WNT5A/FBXO43/PDXP	14
GO:0009452	GO:0009452	7-methylguanosine RNA capping	2/487	34/18866	0.218695	0.637848	0.579719	NCBP1/POLR2H	2
GO:0018149	GO:0018149	peptide cross-linking	2/487	34/18866	0.218695	0.637848	0.579719	TGM2/TGM3	2
GO:0030851	GO:0030851	granulocyte differentiation	2/487	34/18866	0.218695	0.637848	0.579719	RARA/TAL1	2
GO:0031112	GO:0031112	positive regulation of microtubule polymerization or depolymerization	2/487	34/18866	0.218695	0.637848	0.579719	CDK5R1/TRPV4	2
GO:0035774	GO:0035774	positive regulation of insulin secretion involved in cellular response to glucose stimulus	2/487	34/18866	0.218695	0.637848	0.579719	SYBU/ADCY8	2
GO:0036260	GO:0036260	RNA capping	2/487	34/18866	0.218695	0.637848	0.579719	NCBP1/POLR2H	2
GO:0042558	GO:0042558	pteridine-containing compound metabolic process	2/487	34/18866	0.218695	0.637848	0.579719	GCH1/GGH	2
GO:0045648	GO:0045648	positive regulation of erythrocyte differentiation	2/487	34/18866	0.218695	0.637848	0.579719	NCKAP1L/TAL1	2
GO:0048566	GO:0048566	embryonic digestive tract development	2/487	34/18866	0.218695	0.637848	0.579719	RBPMS2/SHOX2	2
GO:0050715	GO:0050715	positive regulation of cytokine secretion	2/487	34/18866	0.218695	0.637848	0.579719	IL1A/RGCC	2
GO:0055094	GO:0055094	response to lipoprotein particle	2/487	34/18866	0.218695	0.637848	0.579719	CDH13/CES1	2
GO:0090504	GO:0090504	epiboly	2/487	34/18866	0.218695	0.637848	0.579719	HBEGF/ARHGAP24	2
GO:1903035	GO:1903035	negative regulation of response to wounding	4/487	93/18866	0.219427	0.637848	0.579719	ALOX5/NOS3/F2/FGF2	4
GO:1904894	GO:1904894	positive regulation of receptor signaling pathway via STAT	4/487	93/18866	0.219427	0.637848	0.579719	CNTF/IL6ST/IL7R/F2	4
GO:2000117	GO:2000117	negative regulation of cysteine-type endopeptidase activity	4/487	93/18866	0.219427	0.637848	0.579719	GPX1/TNFSF14/NGFR/VIL1	4
GO:0007178	GO:0007178	transmembrane receptor protein serine/threonine kinase signaling pathway	12/487	359/18866	0.219555	0.637848	0.579719	ACVR1/FUT8/FZD1/LRG1/RBPMS2/SKI/SMAD6/SPRED3/WNT5A/FAM83G/PRKCZ/SFRP4	12
GO:0043271	GO:0043271	negative regulation of ion transport	6/487	157/18866	0.220533	0.637848	0.579719	GPR35/NOS3/STK39/TLR9/ANO9/SFRP4	6
GO:0006575	GO:0006575	cellular modified amino acid metabolic process	7/487	190/18866	0.221107	0.637848	0.579719	GCH1/GGH/GPX1/OSBPL5/VNN1/SLC16A10/SLC7A11	7
GO:0070507	GO:0070507	regulation of microtubule cytoskeleton organization	7/487	190/18866	0.221107	0.637848	0.579719	CDK5R1/MAPRE2/SKA2/TRIM36/TRPV4/CLIP3/SLC39A12	7
GO:0030072	GO:0030072	peptide hormone secretion	9/487	257/18866	0.221215	0.637848	0.579719	ALOX5/CAPN10/LRP5/SYBU/TRPV4/APLN/SLC16A10/SYT9/ADCY8	9
GO:0034605	GO:0034605	cellular response to heat	5/487	125/18866	0.221842	0.637848	0.579719	AKT1S1/IL1A/MLST8/NUP155/TRPV4	5
GO:0006521	GO:0006521	regulation of cellular amino acid metabolic process	3/487	63/18866	0.221976	0.637848	0.579719	PSMD11/PSMD13/SLC7A11	3
GO:0010830	GO:0010830	regulation of myotube differentiation	3/487	63/18866	0.221976	0.637848	0.579719	RBM38/TNFSF14/SHOX2	3
GO:0031122	GO:0031122	cytoplasmic microtubule organization	3/487	63/18866	0.221976	0.637848	0.579719	TRPV4/TUBG1/CLIP3	3
GO:0031571	GO:0031571	mitotic G1 DNA damage checkpoint	3/487	63/18866	0.221976	0.637848	0.579719	PLAGL1/RGCC/E2F8	3
GO:0043624	GO:0043624	cellular protein complex disassembly	8/487	224/18866	0.223508	0.637848	0.579719	MRPL24/MRPL53/MRPS7/NES/TMOD1/TRPV4/PDXP/VIL1	8
GO:0072001	GO:0072001	renal system development	10/487	292/18866	0.224331	0.637848	0.579719	IFT20/RARA/SMAD6/WNT5A/FGF2/VANGL2/WNT11/ZBTB16/PDGFD/SOX8	10
GO:0071559	GO:0071559	response to transforming growth factor beta	9/487	258/18866	0.224422	0.637848	0.579719	ACVR1/FUT8/LRG1/SKI/SMAD6/SPRED3/WNT5A/PDGFD/PRKCZ	9
GO:0007519	GO:0007519	skeletal muscle tissue development	6/487	158/18866	0.224683	0.637848	0.579719	ASB2/CDON/GPX1/SKI/SHOX2/SOX8	6
GO:0030168	GO:0030168	platelet activation	6/487	158/18866	0.224683	0.637848	0.579719	BLOC1S4/ITGB3/NOS3/F2/GNA14/SLC7A11	6
GO:0060402	GO:0060402	calcium ion transport into cytosol	6/487	158/18866	0.224683	0.637848	0.579719	MCOLN2/TRPV4/CALCR/F2/FGF2/THY1	6
GO:1903707	GO:1903707	negative regulation of hemopoiesis	6/487	158/18866	0.224683	0.637848	0.579719	HMGB3/NCAPG2/RARA/TAL1/ZBTB16/TMEM178A	6
GO:0048167	GO:0048167	regulation of synaptic plasticity	7/487	191/18866	0.224864	0.637848	0.579719	ARC/RARA/YWHAH/ADCY1/ADCY8/NTRK2/PRKCZ	7
GO:0030641	GO:0030641	regulation of cellular pH	4/487	94/18866	0.22491	0.637848	0.579719	ATP6V1A/ATP6V1F/NOX1/SLC4A3	4
GO:0060993	GO:0060993	kidney morphogenesis	4/487	94/18866	0.22491	0.637848	0.579719	FGF2/VANGL2/WNT11/SOX8	4
GO:0098876	GO:0098876	vesicle-mediated transport to the plasma membrane	4/487	94/18866	0.22491	0.637848	0.579719	GOLPH3L/KIF13A/OSBPL5/RAB26	4
GO:1905954	GO:1905954	positive regulation of lipid localization	4/487	94/18866	0.22491	0.637848	0.579719	APOA1/CES1/MAP2K6/PLIN5	4
GO:0006936	GO:0006936	muscle contraction	12/487	362/18866	0.227656	0.637848	0.579719	ARHGAP42/HTR7/KCNJ5/MAP2K6/NUP155/OXTR/TMOD1/GJC1/KCNJ12/NMUR1/KCNA1/PROK2	12
GO:0003203	GO:0003203	endocardial cushion morphogenesis	2/487	35/18866	0.22826	0.637848	0.579719	ACVR1/NOS3	2
GO:0006691	GO:0006691	leukotriene metabolic process	2/487	35/18866	0.22826	0.637848	0.579719	ALOX15/ALOX5	2
GO:0010259	GO:0010259	multicellular organism aging	2/487	35/18866	0.22826	0.637848	0.579719	CISD2/RAD54L	2
GO:0016486	GO:0016486	peptide hormone processing	2/487	35/18866	0.22826	0.637848	0.579719	CES1/SCG5	2
GO:0019362	GO:0019362	pyridine nucleotide metabolic process	2/487	35/18866	0.22826	0.637848	0.579719	RNLS/NNMT	2
GO:0033687	GO:0033687	osteoblast proliferation	2/487	35/18866	0.22826	0.637848	0.579719	LRP5/SOX8	2
GO:0046496	GO:0046496	nicotinamide nucleotide metabolic process	2/487	35/18866	0.22826	0.637848	0.579719	RNLS/NNMT	2
GO:0048333	GO:0048333	mesodermal cell differentiation	2/487	35/18866	0.22826	0.637848	0.579719	ITGB3/TAL1	2
GO:0048821	GO:0048821	erythrocyte development	2/487	35/18866	0.22826	0.637848	0.579719	NCKAP1L/TAL1	2
GO:0060251	GO:0060251	regulation of glial cell proliferation	2/487	35/18866	0.22826	0.637848	0.579719	SKI/ASCL2	2
GO:0060338	GO:0060338	regulation of type I interferon-mediated signaling pathway	2/487	35/18866	0.22826	0.637848	0.579719	WNT5A/ZBP1	2
GO:0065005	GO:0065005	protein-lipid complex assembly	2/487	35/18866	0.22826	0.637848	0.579719	APOA1/APOM	2
GO:0072525	GO:0072525	pyridine-containing compound biosynthetic process	2/487	35/18866	0.22826	0.637848	0.579719	RNLS/NNMT	2
GO:0097009	GO:0097009	energy homeostasis	2/487	35/18866	0.22826	0.637848	0.579719	FOXO1/TRPV4	2
GO:0140448	GO:0140448	signaling receptor ligand precursor processing	2/487	35/18866	0.22826	0.637848	0.579719	CES1/SCG5	2
GO:1900016	GO:1900016	negative regulation of cytokine production involved in inflammatory response	2/487	35/18866	0.22826	0.637848	0.579719	F2/IL1R2	2
GO:1900077	GO:1900077	negative regulation of cellular response to insulin stimulus	2/487	35/18866	0.22826	0.637848	0.579719	AHSG/PRKCZ	2
GO:1901020	GO:1901020	negative regulation of calcium ion transmembrane transporter activity	2/487	35/18866	0.22826	0.637848	0.579719	GPR35/TLR9	2
GO:1901030	GO:1901030	positive regulation of mitochondrial outer membrane permeabilization involved in apoptotic signaling pathway	2/487	35/18866	0.22826	0.637848	0.579719	YWHAH/HIP1R	2
GO:1904031	GO:1904031	positive regulation of cyclin-dependent protein kinase activity	2/487	35/18866	0.22826	0.637848	0.579719	CDK5R1/RGCC	2
GO:1905606	GO:1905606	regulation of presynapse assembly	2/487	35/18866	0.22826	0.637848	0.579719	FZD1/LRFN5	2
GO:0016525	GO:0016525	negative regulation of angiogenesis	7/487	192/18866	0.228642	0.637848	0.579719	ALOX5/ANGPT4/RGCC/SEMA4A/SPINK5/NGFR/TNMD	7
GO:0002066	GO:0002066	columnar/cuboidal epithelial cell development	3/487	64/18866	0.228798	0.637848	0.579719	IL6ST/RARA/WNT5A	3
GO:0033344	GO:0033344	cholesterol efflux	3/487	64/18866	0.228798	0.637848	0.579719	APOA1/CES1/APOM	3
GO:0044783	GO:0044783	G1 DNA damage checkpoint	3/487	64/18866	0.228798	0.637848	0.579719	PLAGL1/RGCC/E2F8	3
GO:0044819	GO:0044819	mitotic G1/S transition checkpoint	3/487	64/18866	0.228798	0.637848	0.579719	PLAGL1/RGCC/E2F8	3
GO:0051926	GO:0051926	negative regulation of calcium ion transport	3/487	64/18866	0.228798	0.637848	0.579719	GPR35/NOS3/TLR9	3
GO:1900449	GO:1900449	regulation of glutamate receptor signaling pathway	3/487	64/18866	0.228798	0.637848	0.579719	ARC/CACNG5/RGS9	3
GO:0001660	GO:0001660	fever generation	1/487	10/18866	0.230173	0.637848	0.579719	IL1A	1
GO:0001840	GO:0001840	neural plate development	1/487	10/18866	0.230173	0.637848	0.579719	VANGL2	1
GO:0001865	GO:0001865	NK T cell differentiation	1/487	10/18866	0.230173	0.637848	0.579719	ZBTB16	1
GO:0002524	GO:0002524	hypersensitivity	1/487	10/18866	0.230173	0.637848	0.579719	IL20RB	1
GO:0002887	GO:0002887	negative regulation of myeloid leukocyte mediated immunity	1/487	10/18866	0.230173	0.637848	0.579719	BCR	1
GO:0006655	GO:0006655	phosphatidylglycerol biosynthetic process	1/487	10/18866	0.230173	0.637848	0.579719	CDS2	1
GO:0007168	GO:0007168	receptor guanylyl cyclase signaling pathway	1/487	10/18866	0.230173	0.637848	0.579719	NPR2	1
GO:0009396	GO:0009396	folic acid-containing compound biosynthetic process	1/487	10/18866	0.230173	0.637848	0.579719	GCH1	1
GO:0010269	GO:0010269	response to selenium ion	1/487	10/18866	0.230173	0.637848	0.579719	GPX1	1
GO:0010603	GO:0010603	regulation of cytoplasmic mRNA processing body assembly	1/487	10/18866	0.230173	0.637848	0.579719	ATXN2	1
GO:0010887	GO:0010887	negative regulation of cholesterol storage	1/487	10/18866	0.230173	0.637848	0.579719	CES1	1
GO:0015808	GO:0015808	L-alanine transport	1/487	10/18866	0.230173	0.637848	0.579719	SLC36A3	1
GO:0018242	GO:0018242	protein O-linked glycosylation via serine	1/487	10/18866	0.230173	0.637848	0.579719	GALNT1	1
GO:0021548	GO:0021548	pons development	1/487	10/18866	0.230173	0.637848	0.579719	CDK5R1	1
GO:0031118	GO:0031118	rRNA pseudouridine synthesis	1/487	10/18866	0.230173	0.637848	0.579719	RPUSD4	1
GO:0032000	GO:0032000	positive regulation of fatty acid beta-oxidation	1/487	10/18866	0.230173	0.637848	0.579719	PLIN5	1
GO:0032308	GO:0032308	positive regulation of prostaglandin secretion	1/487	10/18866	0.230173	0.637848	0.579719	MAP2K6	1
GO:0032661	GO:0032661	regulation of interleukin-18 production	1/487	10/18866	0.230173	0.637848	0.579719	TLR9	1
GO:0033083	GO:0033083	regulation of immature T cell proliferation	1/487	10/18866	0.230173	0.637848	0.579719	IL1A	1
GO:0033314	GO:0033314	mitotic DNA replication checkpoint	1/487	10/18866	0.230173	0.637848	0.579719	HUS1B	1
GO:0034135	GO:0034135	regulation of toll-like receptor 2 signaling pathway	1/487	10/18866	0.230173	0.637848	0.579719	TLR1	1
GO:0034427	GO:0034427	nuclear-transcribed mRNA catabolic process, exonucleolytic, 3'-5'	1/487	10/18866	0.230173	0.637848	0.579719	EXOSC4	1
GO:0035376	GO:0035376	sterol import	1/487	10/18866	0.230173	0.637848	0.579719	APOA1	1
GO:0035524	GO:0035524	proline transmembrane transport	1/487	10/18866	0.230173	0.637848	0.579719	SLC36A3	1
GO:0035907	GO:0035907	dorsal aorta development	1/487	10/18866	0.230173	0.637848	0.579719	NGFR	1
GO:0035933	GO:0035933	glucocorticoid secretion	1/487	10/18866	0.230173	0.637848	0.579719	CRY1	1
GO:0042756	GO:0042756	drinking behavior	1/487	10/18866	0.230173	0.637848	0.579719	APLN	1
GO:0043084	GO:0043084	penile erection	1/487	10/18866	0.230173	0.637848	0.579719	OXTR	1
GO:0045713	GO:0045713	low-density lipoprotein particle receptor biosynthetic process	1/487	10/18866	0.230173	0.637848	0.579719	ITGB3	1
GO:0045792	GO:0045792	negative regulation of cell size	1/487	10/18866	0.230173	0.637848	0.579719	AKT1S1	1
GO:0048262	GO:0048262	determination of dorsal/ventral asymmetry	1/487	10/18866	0.230173	0.637848	0.579719	ACVR1	1
GO:0048755	GO:0048755	branching morphogenesis of a nerve	1/487	10/18866	0.230173	0.637848	0.579719	SHOX2	1
GO:0051351	GO:0051351	positive regulation of ligase activity	1/487	10/18866	0.230173	0.637848	0.579719	NHEJ1	1
GO:0051541	GO:0051541	elastin metabolic process	1/487	10/18866	0.230173	0.637848	0.579719	HBEGF	1
GO:0051918	GO:0051918	negative regulation of fibrinolysis	1/487	10/18866	0.230173	0.637848	0.579719	F2	1
GO:0052646	GO:0052646	alditol phosphate metabolic process	1/487	10/18866	0.230173	0.637848	0.579719	GPAT2	1
GO:0060068	GO:0060068	vagina development	1/487	10/18866	0.230173	0.637848	0.579719	WNT5A	1
GO:0060513	GO:0060513	prostatic bud formation	1/487	10/18866	0.230173	0.637848	0.579719	WNT5A	1
GO:0060600	GO:0060600	dichotomous subdivision of an epithelial terminal unit	1/487	10/18866	0.230173	0.637848	0.579719	VANGL2	1
GO:0060923	GO:0060923	cardiac muscle cell fate commitment	1/487	10/18866	0.230173	0.637848	0.579719	ACVR1	1
GO:0070170	GO:0070170	regulation of tooth mineralization	1/487	10/18866	0.230173	0.637848	0.579719	AMELX	1
GO:0070314	GO:0070314	G1 to G0 transition	1/487	10/18866	0.230173	0.637848	0.579719	RAB11FIP4	1
GO:0070327	GO:0070327	thyroid hormone transport	1/487	10/18866	0.230173	0.637848	0.579719	SLC16A10	1
GO:0070472	GO:0070472	regulation of uterine smooth muscle contraction	1/487	10/18866	0.230173	0.637848	0.579719	OXTR	1
GO:0070508	GO:0070508	cholesterol import	1/487	10/18866	0.230173	0.637848	0.579719	APOA1	1
GO:0070942	GO:0070942	neutrophil mediated cytotoxicity	1/487	10/18866	0.230173	0.637848	0.579719	F2	1
GO:0072124	GO:0072124	regulation of glomerular mesangial cell proliferation	1/487	10/18866	0.230173	0.637848	0.579719	PDGFD	1
GO:0075522	GO:0075522	IRES-dependent viral translational initiation	1/487	10/18866	0.230173	0.637848	0.579719	EIF3B	1
GO:0086070	GO:0086070	SA node cell to atrial cardiac muscle cell communication	1/487	10/18866	0.230173	0.637848	0.579719	GJC1	1
GO:0090009	GO:0090009	primitive streak formation	1/487	10/18866	0.230173	0.637848	0.579719	WNT5A	1
GO:0097050	GO:0097050	type B pancreatic cell apoptotic process	1/487	10/18866	0.230173	0.637848	0.579719	CAPN10	1
GO:0098722	GO:0098722	asymmetric stem cell division	1/487	10/18866	0.230173	0.637848	0.579719	ZBTB16	1
GO:0120252	GO:0120252	hydrocarbon metabolic process	1/487	10/18866	0.230173	0.637848	0.579719	CYP2E1	1
GO:0140042	GO:0140042	lipid droplet formation	1/487	10/18866	0.230173	0.637848	0.579719	CDS2	1
GO:1901203	GO:1901203	positive regulation of extracellular matrix assembly	1/487	10/18866	0.230173	0.637848	0.579719	RGCC	1
GO:1901894	GO:1901894	regulation of ATPase-coupled calcium transmembrane transporter activity	1/487	10/18866	0.230173	0.637848	0.579719	TLR9	1
GO:1902415	GO:1902415	regulation of mRNA binding	1/487	10/18866	0.230173	0.637848	0.579719	CDK9	1
GO:1990416	GO:1990416	cellular response to brain-derived neurotrophic factor stimulus	1/487	10/18866	0.230173	0.637848	0.579719	NTRK2	1
GO:2000048	GO:2000048	negative regulation of cell-cell adhesion mediated by cadherin	1/487	10/18866	0.230173	0.637848	0.579719	RGCC	1
GO:2000425	GO:2000425	regulation of apoptotic cell clearance	1/487	10/18866	0.230173	0.637848	0.579719	ALOX15	1
GO:2001225	GO:2001225	regulation of chloride transport	1/487	10/18866	0.230173	0.637848	0.579719	ANO9	1
GO:0043687	GO:0043687	post-translational protein modification	12/487	363/18866	0.230384	0.637848	0.579719	AHSG/AMELX/APOA1/ASB2/ASB7/CUL9/FBXO40/PSMD11/PSMD13/ASB16/TMEM132A/ZBTB16	12
GO:0007589	GO:0007589	body fluid secretion	4/487	95/18866	0.230427	0.637848	0.579719	HK2/OXTR/STK39/APLN	4
GO:0050709	GO:0050709	negative regulation of protein secretion	4/487	95/18866	0.230427	0.637848	0.579719	RGCC/RHBDF1/RSAD2/CD22	4
GO:0051668	GO:0051668	localization within membrane	4/487	95/18866	0.230427	0.637848	0.579719	CDH13/THY1/CACNG5/SLC7A11	4
GO:0050808	GO:0050808	synapse organization	14/487	433/18866	0.231015	0.637848	0.579719	ARC/CDK5R1/FZD1/ITGAM/LRFN5/OXTR/PFN2/SEMA4A/SYBU/WNT5A/PCDHGC5/LRRC4C/NTRK2/SLC7A11	14
GO:1905477	GO:1905477	positive regulation of protein localization to membrane	5/487	127/18866	0.231272	0.637848	0.579719	CDK5R1/ITGAM/YWHAH/CLIP3/VIL1	5
GO:0071375	GO:0071375	cellular response to peptide hormone stimulus	11/487	330/18866	0.235027	0.637848	0.579719	AHSG/ATP6V1A/ATP6V1F/CAPN10/FOXO1/GAB1/GPR173/ADCY1/GNRHR/ADCY8/PRKCZ	11
GO:0006940	GO:0006940	regulation of smooth muscle contraction	3/487	65/18866	0.235659	0.637848	0.579719	ARHGAP42/OXTR/PROK2	3
GO:0035308	GO:0035308	negative regulation of protein dephosphorylation	3/487	65/18866	0.235659	0.637848	0.579719	IKBKB/NCKAP1L/SH3RF2	3
GO:0035773	GO:0035773	insulin secretion involved in cellular response to glucose stimulus	3/487	65/18866	0.235659	0.637848	0.579719	LRP5/SYBU/ADCY8	3
GO:0048247	GO:0048247	lymphocyte chemotaxis	3/487	65/18866	0.235659	0.637848	0.579719	STK39/TNFSF14/WNT5A	3
GO:0060675	GO:0060675	ureteric bud morphogenesis	3/487	65/18866	0.235659	0.637848	0.579719	FGF2/WNT11/SOX8	3
GO:1905953	GO:1905953	negative regulation of lipid localization	3/487	65/18866	0.235659	0.637848	0.579719	CES1/CRY1/ITGB3	3
GO:0010972	GO:0010972	negative regulation of G2/M transition of mitotic cell cycle	4/487	96/18866	0.235978	0.637848	0.579719	DONSON/PSMD11/PSMD13/HUS1B	4
GO:0014013	GO:0014013	regulation of gliogenesis	5/487	128/18866	0.23603	0.637848	0.579719	IL6ST/SKI/ASCL2/F2/SOX8	5
GO:0072089	GO:0072089	stem cell proliferation	5/487	128/18866	0.23603	0.637848	0.579719	NES/WNT5A/FGF2/ZNRF3/KCNA1	5
GO:2000181	GO:2000181	negative regulation of blood vessel morphogenesis	7/487	194/18866	0.236264	0.637848	0.579719	ALOX5/ANGPT4/RGCC/SEMA4A/SPINK5/NGFR/TNMD	7
GO:0010970	GO:0010970	transport along microtubule	6/487	161/18866	0.237282	0.637848	0.579719	BBS12/BLOC1S4/IFT20/KIF13A/SYBU/PRKCZ	6
GO:0031570	GO:0031570	DNA integrity checkpoint	6/487	161/18866	0.237282	0.637848	0.579719	CRY1/DONSON/PLAGL1/RGCC/HUS1B/E2F8	6
GO:0048705	GO:0048705	skeletal system morphogenesis	8/487	228/18866	0.237481	0.637848	0.579719	LRP5/NAB2/RARA/SKI/TRPV4/ALX1/SHOX2/SFRP4	8
GO:0003382	GO:0003382	epithelial cell morphogenesis	2/487	36/18866	0.237853	0.637848	0.579719	TNMD/COL22A1	2
GO:0009595	GO:0009595	detection of biotic stimulus	2/487	36/18866	0.237853	0.637848	0.579719	NOD1/TLR1	2
GO:0010092	GO:0010092	specification of animal organ identity	2/487	36/18866	0.237853	0.637848	0.579719	WNT5A/WNT11	2
GO:0010543	GO:0010543	regulation of platelet activation	2/487	36/18866	0.237853	0.637848	0.579719	NOS3/F2	2
GO:0033572	GO:0033572	transferrin transport	2/487	36/18866	0.237853	0.637848	0.579719	ATP6V1A/ATP6V1F	2
GO:0034405	GO:0034405	response to fluid shear stress	2/487	36/18866	0.237853	0.637848	0.579719	NOS3/SMAD6	2
GO:0045742	GO:0045742	positive regulation of epidermal growth factor receptor signaling pathway	2/487	36/18866	0.237853	0.637848	0.579719	HBEGF/HIP1R	2
GO:0060323	GO:0060323	head morphogenesis	2/487	36/18866	0.237853	0.637848	0.579719	CRISPLD2/SKI	2
GO:0071402	GO:0071402	cellular response to lipoprotein particle stimulus	2/487	36/18866	0.237853	0.637848	0.579719	CDH13/CES1	2
GO:0090313	GO:0090313	regulation of protein targeting to membrane	2/487	36/18866	0.237853	0.637848	0.579719	CDK5R1/ITGAM	2
GO:0099174	GO:0099174	regulation of presynapse organization	2/487	36/18866	0.237853	0.637848	0.579719	FZD1/LRFN5	2
GO:1905475	GO:1905475	regulation of protein localization to membrane	7/487	195/18866	0.240106	0.637848	0.579719	CDK5R1/ITGAM/YWHAH/CLIP3/VIL1/PRKCZ/SLC7A11	7
GO:0072521	GO:0072521	purine-containing compound metabolic process	15/487	472/18866	0.240442	0.637848	0.579719	ALDOC/COX5B/ENO2/FBP1/GPX1/HK2/NOS3/NPR2/NUP155/RORA/SLC2A9/ACSM5/ADCY1/NUDT11/ADCY8	15
GO:0008202	GO:0008202	steroid metabolic process	11/487	332/18866	0.240855	0.637848	0.579719	ACAA1/APOA1/CES1/CYP2E1/CYP3A4/LRP5/OSBPL5/RORA/SMPD1/YWHAH/DHRS2	11
GO:0051098	GO:0051098	regulation of binding	12/487	367/18866	0.241421	0.637848	0.579719	BCL3/CDK9/CDON/HABP4/IRF4/NCBP1/NES/PYHIN1/RARA/SKI/WNT5A/HIP1R	12
GO:1902652	GO:1902652	secondary alcohol metabolic process	6/487	162/18866	0.241529	0.637848	0.579719	APOA1/CES1/CYP3A4/LRP5/OSBPL5/SMPD1	6
GO:0030516	GO:0030516	regulation of axon extension	4/487	97/18866	0.24156	0.637848	0.579719	CDH4/CDK5R1/SEMA4A/WNT5A	4
GO:0032651	GO:0032651	regulation of interleukin-1 beta production	4/487	97/18866	0.24156	0.637848	0.579719	APOA1/NOD1/PYHIN1/WNT5A	4
GO:0042100	GO:0042100	B cell proliferation	4/487	97/18866	0.24156	0.637848	0.579719	IL7R/NCKAP1L/TLR9/CD22	4
GO:1901184	GO:1901184	regulation of ERBB signaling pathway	4/487	97/18866	0.24156	0.637848	0.579719	CDH13/HBEGF/RHBDF1/HIP1R	4
GO:1990868	GO:1990868	response to chemokine	4/487	97/18866	0.24156	0.637848	0.579719	ACKR3/GPR35/PPBP/STK39	4
GO:1990869	GO:1990869	cellular response to chemokine	4/487	97/18866	0.24156	0.637848	0.579719	ACKR3/GPR35/PPBP/STK39	4
GO:0007585	GO:0007585	respiratory gaseous exchange by respiratory system	3/487	66/18866	0.242555	0.637848	0.579719	COX5B/FUT8/APLN	3
GO:0032715	GO:0032715	negative regulation of interleukin-6 production	3/487	66/18866	0.242555	0.637848	0.579719	CD200R1/NCKAP1L/TLR9	3
GO:0032922	GO:0032922	circadian regulation of gene expression	3/487	66/18866	0.242555	0.637848	0.579719	CRY1/RORA/NGFR	3
GO:0042490	GO:0042490	mechanoreceptor differentiation	3/487	66/18866	0.242555	0.637848	0.579719	IFT20/VANGL2/NTRK2	3
GO:0045669	GO:0045669	positive regulation of osteoblast differentiation	3/487	66/18866	0.242555	0.637848	0.579719	ACVR1/IL6ST/LRP5	3
GO:0048207	GO:0048207	vesicle targeting, rough ER to cis-Golgi	3/487	66/18866	0.242555	0.637848	0.579719	PREB/SAR1B/COL7A1	3
GO:0048208	GO:0048208	COPII vesicle coating	3/487	66/18866	0.242555	0.637848	0.579719	PREB/SAR1B/COL7A1	3
GO:0072171	GO:0072171	mesonephric tubule morphogenesis	3/487	66/18866	0.242555	0.637848	0.579719	FGF2/WNT11/SOX8	3
GO:0150116	GO:0150116	regulation of cell-substrate junction organization	3/487	66/18866	0.242555	0.637848	0.579719	MAPRE2/DLC1/THY1	3
GO:1901016	GO:1901016	regulation of potassium ion transmembrane transporter activity	3/487	66/18866	0.242555	0.637848	0.579719	STK39/KCNS2/KCNA1	3
GO:2000378	GO:2000378	negative regulation of reactive oxygen species metabolic process	3/487	66/18866	0.242555	0.637848	0.579719	BCR/HK2/PLIN5	3
GO:0051346	GO:0051346	negative regulation of hydrolase activity	15/487	473/18866	0.242892	0.637848	0.579719	AHSG/AMBP/APOA1/GPX1/IKBKB/NCKAP1L/NOS3/PLIN5/SPINK5/TNFSF14/COL7A1/NGFR/SH3RF2/VIL1/PRKCZ	15
GO:0048863	GO:0048863	stem cell differentiation	9/487	264/18866	0.244025	0.637848	0.579719	ACVR1/FZD1/PSMD11/PSMD13/SEMA4A/TAL1/ALX1/MEOX1/SOX8	9
GO:0007088	GO:0007088	regulation of mitotic nuclear division	6/487	163/18866	0.245799	0.637848	0.579719	CUL9/IL1A/LRP5/RGCC/FBXO43/PDXP	6
GO:0003091	GO:0003091	renal water homeostasis	2/487	37/18866	0.247466	0.637848	0.579719	ADCY1/ADCY8	2
GO:0006882	GO:0006882	cellular zinc ion homeostasis	2/487	37/18866	0.247466	0.637848	0.579719	MT1H/SLC39A12	2
GO:0006921	GO:0006921	cellular component disassembly involved in execution phase of apoptosis	2/487	37/18866	0.247466	0.637848	0.579719	CAPN10/DNASE2B	2
GO:0032717	GO:0032717	negative regulation of interleukin-8 production	2/487	37/18866	0.247466	0.637848	0.579719	BCL3/TLR9	2
GO:0033120	GO:0033120	positive regulation of RNA splicing	2/487	37/18866	0.247466	0.637848	0.579719	HABP4/NCBP1	2
GO:0045730	GO:0045730	respiratory burst	2/487	37/18866	0.247466	0.637848	0.579719	BCR/NOX1	2
GO:0048846	GO:0048846	axon extension involved in axon guidance	2/487	37/18866	0.247466	0.637848	0.579719	SEMA4A/WNT5A	2
GO:0070423	GO:0070423	nucleotide-binding oligomerization domain containing signaling pathway	2/487	37/18866	0.247466	0.637848	0.579719	MAP2K6/NOD1	2
GO:0071542	GO:0071542	dopaminergic neuron differentiation	2/487	37/18866	0.247466	0.637848	0.579719	FZD1/WNT5A	2
GO:0090050	GO:0090050	positive regulation of cell migration involved in sprouting angiogenesis	2/487	37/18866	0.247466	0.637848	0.579719	FGF2/RHOJ	2
GO:1902284	GO:1902284	neuron projection extension involved in neuron projection guidance	2/487	37/18866	0.247466	0.637848	0.579719	SEMA4A/WNT5A	2
GO:1905314	GO:1905314	semi-lunar valve development	2/487	37/18866	0.247466	0.637848	0.579719	NOS3/SMAD6	2
GO:2000785	GO:2000785	regulation of autophagosome assembly	2/487	37/18866	0.247466	0.637848	0.579719	ADPRH/IFT20	2
GO:0030239	GO:0030239	myofibril assembly	3/487	67/18866	0.249483	0.637848	0.579719	KRT8/MYLK3/TMOD1	3
GO:0032890	GO:0032890	regulation of organic acid transport	3/487	67/18866	0.249483	0.637848	0.579719	CES1/MAP2K6/STK39	3
GO:0051965	GO:0051965	positive regulation of synapse assembly	3/487	67/18866	0.249483	0.637848	0.579719	OXTR/SEMA4A/NTRK2	3
GO:0070613	GO:0070613	regulation of protein processing	3/487	67/18866	0.249483	0.637848	0.579719	ASTL/IL1R2/RFX4	3
GO:0071300	GO:0071300	cellular response to retinoic acid	3/487	67/18866	0.249483	0.637848	0.579719	WNT5A/WNT11/RORB	3
GO:0002460	GO:0002460	adaptive immune response based on somatic recombination of immune receptors built from immunoglobulin superfamily domains	12/487	370/18866	0.249828	0.637848	0.579719	BCL3/CD274/IL20RB/IL27RA/IL7R/IRF4/RORA/RSAD2/SEMA4A/SLA2/C1RL/PRKCZ	12
GO:1904951	GO:1904951	positive regulation of establishment of protein localization	12/487	370/18866	0.249828	0.637848	0.579719	CAPN10/CDK5R1/GOLPH3L/IL1A/ITGAM/RGCC/SAR1B/SYBU/YWHAH/EXPH5/ADCY8/PRKCZ	12
GO:0002604	GO:0002604	regulation of dendritic cell antigen processing and presentation	1/487	11/18866	0.250056	0.637848	0.579719	NOD1	1
GO:0003157	GO:0003157	endocardium development	1/487	11/18866	0.250056	0.637848	0.579719	ACVR1	1
GO:0006182	GO:0006182	cGMP biosynthetic process	1/487	11/18866	0.250056	0.637848	0.579719	NPR2	1
GO:0006527	GO:0006527	arginine catabolic process	1/487	11/18866	0.250056	0.637848	0.579719	NOS3	1
GO:0006857	GO:0006857	oligopeptide transport	1/487	11/18866	0.250056	0.637848	0.579719	SLC7A11	1
GO:0009950	GO:0009950	dorsal/ventral axis specification	1/487	11/18866	0.250056	0.637848	0.579719	SMAD6	1
GO:0010172	GO:0010172	embryonic body morphogenesis	1/487	11/18866	0.250056	0.637848	0.579719	CDON	1
GO:0010739	GO:0010739	positive regulation of protein kinase A signaling	1/487	11/18866	0.250056	0.637848	0.579719	CALCR	1
GO:0018401	GO:0018401	peptidyl-proline hydroxylation to 4-hydroxy-L-proline	1/487	11/18866	0.250056	0.637848	0.579719	EGLN3	1
GO:0019852	GO:0019852	L-ascorbic acid metabolic process	1/487	11/18866	0.250056	0.637848	0.579719	SLC2A3	1
GO:0030422	GO:0030422	production of siRNA involved in RNA interference	1/487	11/18866	0.250056	0.637848	0.579719	DROSHA	1
GO:0031284	GO:0031284	positive regulation of guanylate cyclase activity	1/487	11/18866	0.250056	0.637848	0.579719	NOS3	1
GO:0031442	GO:0031442	positive regulation of mRNA 3'-end processing	1/487	11/18866	0.250056	0.637848	0.579719	NCBP1	1
GO:0031630	GO:0031630	regulation of synaptic vesicle fusion to presynaptic active zone membrane	1/487	11/18866	0.250056	0.637848	0.579719	SYT9	1
GO:0031652	GO:0031652	positive regulation of heat generation	1/487	11/18866	0.250056	0.637848	0.579719	APLN	1
GO:0031915	GO:0031915	positive regulation of synaptic plasticity	1/487	11/18866	0.250056	0.637848	0.579719	ADCY8	1
GO:0032060	GO:0032060	bleb assembly	1/487	11/18866	0.250056	0.637848	0.579719	LPAR1	1
GO:0032253	GO:0032253	dense core granule localization	1/487	11/18866	0.250056	0.637848	0.579719	SYBU	1
GO:0032306	GO:0032306	regulation of prostaglandin secretion	1/487	11/18866	0.250056	0.637848	0.579719	MAP2K6	1
GO:0033079	GO:0033079	immature T cell proliferation	1/487	11/18866	0.250056	0.637848	0.579719	IL1A	1
GO:0034115	GO:0034115	negative regulation of heterotypic cell-cell adhesion	1/487	11/18866	0.250056	0.637848	0.579719	APOA1	1
GO:0034372	GO:0034372	very-low-density lipoprotein particle remodeling	1/487	11/18866	0.250056	0.637848	0.579719	APOA1	1
GO:0034378	GO:0034378	chylomicron assembly	1/487	11/18866	0.250056	0.637848	0.579719	APOA1	1
GO:0035090	GO:0035090	maintenance of apical/basal cell polarity	1/487	11/18866	0.250056	0.637848	0.579719	WNT11	1
GO:0035457	GO:0035457	cellular response to interferon-alpha	1/487	11/18866	0.250056	0.637848	0.579719	PYHIN1	1
GO:0035768	GO:0035768	endothelial cell chemotaxis to fibroblast growth factor	1/487	11/18866	0.250056	0.637848	0.579719	FGF2	1
GO:0045199	GO:0045199	maintenance of epithelial cell apical/basal polarity	1/487	11/18866	0.250056	0.637848	0.579719	WNT11	1
GO:0045835	GO:0045835	negative regulation of meiotic nuclear division	1/487	11/18866	0.250056	0.637848	0.579719	FBXO43	1
GO:0046642	GO:0046642	negative regulation of alpha-beta T cell proliferation	1/487	11/18866	0.250056	0.637848	0.579719	CD274	1
GO:0046643	GO:0046643	regulation of gamma-delta T cell activation	1/487	11/18866	0.250056	0.637848	0.579719	NCKAP1L	1
GO:0048102	GO:0048102	autophagic cell death	1/487	11/18866	0.250056	0.637848	0.579719	TP53INP1	1
GO:0048103	GO:0048103	somatic stem cell division	1/487	11/18866	0.250056	0.637848	0.579719	VANGL2	1
GO:0048672	GO:0048672	positive regulation of collateral sprouting	1/487	11/18866	0.250056	0.637848	0.579719	CRABP2	1
GO:0048680	GO:0048680	positive regulation of axon regeneration	1/487	11/18866	0.250056	0.637848	0.579719	CNTF	1
GO:0048742	GO:0048742	regulation of skeletal muscle fiber development	1/487	11/18866	0.250056	0.637848	0.579719	SHOX2	1
GO:0048853	GO:0048853	forebrain morphogenesis	1/487	11/18866	0.250056	0.637848	0.579719	WNT5A	1
GO:0051006	GO:0051006	positive regulation of lipoprotein lipase activity	1/487	11/18866	0.250056	0.637848	0.579719	APOA1	1
GO:0051561	GO:0051561	positive regulation of mitochondrial calcium ion concentration	1/487	11/18866	0.250056	0.637848	0.579719	TGM2	1
GO:0051610	GO:0051610	serotonin uptake	1/487	11/18866	0.250056	0.637848	0.579719	ITGB3	1
GO:0060159	GO:0060159	regulation of dopamine receptor signaling pathway	1/487	11/18866	0.250056	0.637848	0.579719	ALK	1
GO:0060272	GO:0060272	embryonic skeletal joint morphogenesis	1/487	11/18866	0.250056	0.637848	0.579719	SHOX2	1
GO:0060281	GO:0060281	regulation of oocyte development	1/487	11/18866	0.250056	0.637848	0.579719	NPR2	1
GO:0060354	GO:0060354	negative regulation of cell adhesion molecule production	1/487	11/18866	0.250056	0.637848	0.579719	APOA1	1
GO:0070339	GO:0070339	response to bacterial lipopeptide	1/487	11/18866	0.250056	0.637848	0.579719	TLR1	1
GO:0070417	GO:0070417	cellular response to cold	1/487	11/18866	0.250056	0.637848	0.579719	FOXO1	1
GO:0070471	GO:0070471	uterine smooth muscle contraction	1/487	11/18866	0.250056	0.637848	0.579719	OXTR	1
GO:0070587	GO:0070587	regulation of cell-cell adhesion involved in gastrulation	1/487	11/18866	0.250056	0.637848	0.579719	APOA1	1
GO:0070673	GO:0070673	response to interleukin-18	1/487	11/18866	0.250056	0.637848	0.579719	ALOX5	1
GO:0071220	GO:0071220	cellular response to bacterial lipoprotein	1/487	11/18866	0.250056	0.637848	0.579719	TLR1	1
GO:0071221	GO:0071221	cellular response to bacterial lipopeptide	1/487	11/18866	0.250056	0.637848	0.579719	TLR1	1
GO:0072110	GO:0072110	glomerular mesangial cell proliferation	1/487	11/18866	0.250056	0.637848	0.579719	PDGFD	1
GO:0072173	GO:0072173	metanephric tubule morphogenesis	1/487	11/18866	0.250056	0.637848	0.579719	SOX8	1
GO:0072321	GO:0072321	chaperone-mediated protein transport	1/487	11/18866	0.250056	0.637848	0.579719	CLIP3	1
GO:0090193	GO:0090193	positive regulation of glomerulus development	1/487	11/18866	0.250056	0.637848	0.579719	PDGFD	1
GO:0090205	GO:0090205	positive regulation of cholesterol metabolic process	1/487	11/18866	0.250056	0.637848	0.579719	CES1	1
GO:0097396	GO:0097396	response to interleukin-17	1/487	11/18866	0.250056	0.637848	0.579719	IL17RC	1
GO:0097398	GO:0097398	cellular response to interleukin-17	1/487	11/18866	0.250056	0.637848	0.579719	IL17RC	1
GO:0097400	GO:0097400	interleukin-17-mediated signaling pathway	1/487	11/18866	0.250056	0.637848	0.579719	IL17RC	1
GO:0098883	GO:0098883	synapse pruning	1/487	11/18866	0.250056	0.637848	0.579719	ITGAM	1
GO:0099519	GO:0099519	dense core granule cytoskeletal transport	1/487	11/18866	0.250056	0.637848	0.579719	SYBU	1
GO:0099624	GO:0099624	atrial cardiac muscle cell membrane repolarization	1/487	11/18866	0.250056	0.637848	0.579719	KCNJ5	1
GO:1900003	GO:1900003	regulation of serine-type endopeptidase activity	1/487	11/18866	0.250056	0.637848	0.579719	SPINK5	1
GO:1901950	GO:1901950	dense core granule transport	1/487	11/18866	0.250056	0.637848	0.579719	SYBU	1
GO:1902474	GO:1902474	positive regulation of protein localization to synapse	1/487	11/18866	0.250056	0.637848	0.579719	WNT5A	1
GO:1902571	GO:1902571	regulation of serine-type peptidase activity	1/487	11/18866	0.250056	0.637848	0.579719	SPINK5	1
GO:1904350	GO:1904350	regulation of protein catabolic process in the vacuole	1/487	11/18866	0.250056	0.637848	0.579719	RNF128	1
GO:1904478	GO:1904478	regulation of intestinal absorption	1/487	11/18866	0.250056	0.637848	0.579719	APOA1	1
GO:1905879	GO:1905879	regulation of oogenesis	1/487	11/18866	0.250056	0.637848	0.579719	NPR2	1
GO:2000035	GO:2000035	regulation of stem cell division	1/487	11/18866	0.250056	0.637848	0.579719	PRDM15	1
GO:2000049	GO:2000049	positive regulation of cell-cell adhesion mediated by cadherin	1/487	11/18866	0.250056	0.637848	0.579719	WNT5A	1
GO:2000317	GO:2000317	negative regulation of T-helper 17 type immune response	1/487	11/18866	0.250056	0.637848	0.579719	IL27RA	1
GO:2000392	GO:2000392	regulation of lamellipodium morphogenesis	1/487	11/18866	0.250056	0.637848	0.579719	VIL1	1
GO:2000544	GO:2000544	regulation of endothelial cell chemotaxis to fibroblast growth factor	1/487	11/18866	0.250056	0.637848	0.579719	FGF2	1
GO:2000628	GO:2000628	regulation of miRNA metabolic process	1/487	11/18866	0.250056	0.637848	0.579719	DROSHA	1
GO:2001138	GO:2001138	regulation of phospholipid transport	1/487	11/18866	0.250056	0.637848	0.579719	APOA1	1
GO:2001140	GO:2001140	positive regulation of phospholipid transport	1/487	11/18866	0.250056	0.637848	0.579719	APOA1	1
GO:0010508	GO:0010508	positive regulation of autophagy	5/487	131/18866	0.250462	0.637848	0.579719	FOXO1/HK2/NOD1/TP53INP1/TRIML2	5
GO:0008544	GO:0008544	epidermis development	15/487	477/18866	0.252789	0.637848	0.579719	ALDH3A2/BCR/CRABP2/KRT8/NAB2/SPINK5/WNT5A/COL7A1/EXPH5/KRTAP4-4/NGFR/SPRR3/TGM3/VANGL2/SFRP4	15
GO:0002474	GO:0002474	antigen processing and presentation of peptide antigen via MHC class I	4/487	99/18866	0.252813	0.637848	0.579719	IKBKB/PSMD11/PSMD13/SAR1B	4
GO:0010717	GO:0010717	regulation of epithelial to mesenchymal transition	4/487	99/18866	0.252813	0.637848	0.579719	ACVR1/RGCC/SPRED3/ALX1	4
GO:0043255	GO:0043255	regulation of carbohydrate biosynthetic process	4/487	99/18866	0.252813	0.637848	0.579719	CRY1/FBP1/FOXO1/PGP	4
GO:0043473	GO:0043473	pigmentation	4/487	99/18866	0.252813	0.637848	0.579719	BLOC1S4/KIF13A/PMEL/SHROOM2	4
GO:0090277	GO:0090277	positive regulation of peptide hormone secretion	4/487	99/18866	0.252813	0.637848	0.579719	CAPN10/SYBU/APLN/ADCY8	4
GO:0006163	GO:0006163	purine nucleotide metabolic process	14/487	442/18866	0.25397	0.637848	0.579719	ALDOC/COX5B/ENO2/FBP1/GPX1/HK2/NOS3/NPR2/NUP155/RORA/ACSM5/ADCY1/NUDT11/ADCY8	14
GO:0046883	GO:0046883	regulation of hormone secretion	9/487	267/18866	0.254043	0.637848	0.579719	ALOX5/CAPN10/CRY1/LRP5/SYBU/APLN/SCG5/SYT9/ADCY8	9
GO:0140053	GO:0140053	mitochondrial gene expression	6/487	165/18866	0.254404	0.637848	0.579719	METTL4/MRPL24/MRPL53/MRPS7/RPUSD4/TBRG4	6
GO:0007517	GO:0007517	muscle organ development	13/487	407/18866	0.254896	0.637848	0.579719	ASB2/CDON/CNTF/FZD1/GPX1/HBEGF/SKI/WNT5A/CHODL/FGF2/SHOX2/VANGL2/SOX8	13
GO:0002637	GO:0002637	regulation of immunoglobulin production	3/487	68/18866	0.256441	0.637848	0.579719	IL27RA/TLR9/CD22	3
GO:0032642	GO:0032642	regulation of chemokine production	3/487	68/18866	0.256441	0.637848	0.579719	MCOLN2/TLR9/TRPV4	3
GO:0042391	GO:0042391	regulation of membrane potential	14/487	443/18866	0.256572	0.637848	0.579719	GPR35/KCNJ5/KCNK5/KCNK6/KCNMB4/NUP155/SLC4A3/YWHAH/GJC1/GNA14/CNR2/KCNA1/NTRK2/PRKCZ	14
GO:0003156	GO:0003156	regulation of animal organ formation	2/487	38/18866	0.257091	0.637848	0.579719	WNT5A/WNT11	2
GO:0006361	GO:0006361	transcription initiation from RNA polymerase I promoter	2/487	38/18866	0.257091	0.637848	0.579719	POLR1A/POLR2H	2
GO:0007223	GO:0007223	Wnt signaling pathway, calcium modulating pathway	2/487	38/18866	0.257091	0.637848	0.579719	WNT5A/WNT11	2
GO:0019433	GO:0019433	triglyceride catabolic process	2/487	38/18866	0.257091	0.637848	0.579719	APOA1/PLIN5	2
GO:0034661	GO:0034661	ncRNA catabolic process	2/487	38/18866	0.257091	0.637848	0.579719	DROSHA/EXOSC4	2
GO:0035872	GO:0035872	nucleotide-binding domain, leucine rich repeat containing receptor signaling pathway	2/487	38/18866	0.257091	0.637848	0.579719	MAP2K6/NOD1	2
GO:0043029	GO:0043029	T cell homeostasis	2/487	38/18866	0.257091	0.637848	0.579719	NCKAP1L/TNFSF14	2
GO:0045923	GO:0045923	positive regulation of fatty acid metabolic process	2/487	38/18866	0.257091	0.637848	0.579719	APOA1/PLIN5	2
GO:0046596	GO:0046596	regulation of viral entry into host cell	2/487	38/18866	0.257091	0.637848	0.579719	HS3ST5/TRIML2	2
GO:1901186	GO:1901186	positive regulation of ERBB signaling pathway	2/487	38/18866	0.257091	0.637848	0.579719	HBEGF/HIP1R	2
GO:1903531	GO:1903531	negative regulation of secretion by cell	6/487	166/18866	0.258737	0.637848	0.579719	BCR/CRY1/RGCC/RHBDF1/RSAD2/CD22	6
GO:0097305	GO:0097305	response to alcohol	8/487	234/18866	0.258977	0.637848	0.579719	CES1/CYP2E1/GGH/MLC1/RARA/TP53INP1/ADCY1/ADCY8	8
GO:0030705	GO:0030705	cytoskeleton-dependent intracellular transport	7/487	200/18866	0.259606	0.637848	0.579719	ACTN4/BBS12/BLOC1S4/IFT20/KIF13A/SYBU/PRKCZ	7
GO:0006165	GO:0006165	nucleoside diphosphate phosphorylation	5/487	133/18866	0.260205	0.637848	0.579719	ALDOC/ENO2/FBP1/HK2/NUP155	5
GO:0006997	GO:0006997	nucleus organization	5/487	133/18866	0.260205	0.637848	0.579719	DYRK3/HABP4/NUP155/SPAG4/TSSK6	5
GO:0002831	GO:0002831	regulation of response to biotic stimulus	13/487	409/18866	0.260344	0.637848	0.579719	CD274/HMGB3/IKBKB/NOD1/PSMD11/PSMD13/PYHIN1/SPINK5/WNT5A/FPR2/GBP5/TREML4/ZBP1	13
GO:0060537	GO:0060537	muscle tissue development	13/487	409/18866	0.260344	0.637848	0.579719	ACVR1/ASB2/CDON/GPX1/IFT20/MYLK3/RARA/SKI/WNT5A/FGF2/GJC1/SHOX2/SOX8	13
GO:0000302	GO:0000302	response to reactive oxygen species	8/487	235/18866	0.262617	0.637848	0.579719	CYP2E1/FOXO1/GCH1/GPX1/MAPK13/NOS3/TXNRD2/PDGFD	8
GO:0030032	GO:0030032	lamellipodium assembly	3/487	69/18866	0.263426	0.637848	0.579719	CDH13/PARVB/SPATA13	3
GO:0035914	GO:0035914	skeletal muscle cell differentiation	3/487	69/18866	0.263426	0.637848	0.579719	ASB2/CDON/SOX8	3
GO:0042698	GO:0042698	ovulation cycle	3/487	69/18866	0.263426	0.637848	0.579719	MAP2K6/NOS3/OXTR	3
GO:0048662	GO:0048662	negative regulation of smooth muscle cell proliferation	3/487	69/18866	0.263426	0.637848	0.579719	NOS3/PTGIR/APLN	3
GO:0050854	GO:0050854	regulation of antigen receptor-mediated signaling pathway	3/487	69/18866	0.263426	0.637848	0.579719	SLA2/THY1/CD22	3
GO:1903317	GO:1903317	regulation of protein maturation	3/487	69/18866	0.263426	0.637848	0.579719	ASTL/IL1R2/RFX4	3
GO:0001708	GO:0001708	cell fate specification	4/487	101/18866	0.264172	0.637848	0.579719	CDON/WNT5A/FGF2/WNT11	4
GO:0002792	GO:0002792	negative regulation of peptide secretion	4/487	101/18866	0.264172	0.637848	0.579719	RGCC/RHBDF1/RSAD2/CD22	4
GO:0007215	GO:0007215	glutamate receptor signaling pathway	4/487	101/18866	0.264172	0.637848	0.579719	ARC/CDK5R1/CACNG5/RGS9	4
GO:0032637	GO:0032637	interleukin-8 production	4/487	101/18866	0.264172	0.637848	0.579719	BCL3/NOD1/TLR1/TLR9	4
GO:0007498	GO:0007498	mesoderm development	5/487	134/18866	0.265109	0.637848	0.579719	ACVR1/ITGB3/TAL1/WNT5A/WNT11	5
GO:0034754	GO:0034754	cellular hormone metabolic process	5/487	134/18866	0.265109	0.637848	0.579719	CRABP2/CYP2S1/CYP3A4/RBP1/DHRS2	5
GO:0043280	GO:0043280	positive regulation of cysteine-type endopeptidase activity involved in apoptotic process	5/487	134/18866	0.265109	0.637848	0.579719	EGLN3/NOD1/DLC1/NGFR/HIP1R	5
GO:0045995	GO:0045995	regulation of embryonic development	5/487	134/18866	0.265109	0.637848	0.579719	APOA1/FZD1/GPR161/WNT5A/VANGL2	5
GO:0060560	GO:0060560	developmental growth involved in morphogenesis	8/487	236/18866	0.266272	0.637848	0.579719	CDH4/CDK5R1/CRABP2/SEMA4A/WNT5A/VANGL2/WNT11/PRKCZ	8
GO:0000578	GO:0000578	embryonic axis specification	2/487	39/18866	0.266722	0.637848	0.579719	SMAD6/WNT5A	2
GO:0007340	GO:0007340	acrosome reaction	2/487	39/18866	0.266722	0.637848	0.579719	TRIM36/FAM170B	2
GO:0010831	GO:0010831	positive regulation of myotube differentiation	2/487	39/18866	0.266722	0.637848	0.579719	TNFSF14/SHOX2	2
GO:0055069	GO:0055069	zinc ion homeostasis	2/487	39/18866	0.266722	0.637848	0.579719	MT1H/SLC39A12	2
GO:0055090	GO:0055090	acylglycerol homeostasis	2/487	39/18866	0.266722	0.637848	0.579719	APOA1/RORA	2
GO:0070328	GO:0070328	triglyceride homeostasis	2/487	39/18866	0.266722	0.637848	0.579719	APOA1/RORA	2
GO:0060538	GO:0060538	skeletal muscle organ development	6/487	168/18866	0.267461	0.637848	0.579719	ASB2/CDON/GPX1/SKI/SHOX2/SOX8	6
GO:0007179	GO:0007179	transforming growth factor beta receptor signaling pathway	7/487	202/18866	0.267532	0.637848	0.579719	ACVR1/FUT8/LRG1/SKI/SMAD6/SPRED3/PRKCZ	7
GO:0034341	GO:0034341	response to interferon-gamma	7/487	202/18866	0.267532	0.637848	0.579719	GBP2/GBP4/GCH1/IRF4/OAS1/WNT5A/GBP5	7
GO:0051051	GO:0051051	negative regulation of transport	15/487	483/18866	0.267916	0.637848	0.579719	ATXN2/BCR/CRY1/GPR35/ITGB3/NOS3/OXTR/RGCC/RHBDF1/RSAD2/STK39/TLR9/ANO9/CD22/SFRP4	15
GO:0000727	GO:0000727	double-strand break repair via break-induced replication	1/487	12/18866	0.269426	0.637848	0.579719	GINS4	1
GO:0002002	GO:0002002	regulation of angiotensin levels in blood	1/487	12/18866	0.269426	0.637848	0.579719	CES1	1
GO:0002003	GO:0002003	angiotensin maturation	1/487	12/18866	0.269426	0.637848	0.579719	CES1	1
GO:0002024	GO:0002024	diet induced thermogenesis	1/487	12/18866	0.269426	0.637848	0.579719	TRPV4	1
GO:0002468	GO:0002468	dendritic cell antigen processing and presentation	1/487	12/18866	0.269426	0.637848	0.579719	NOD1	1
GO:0003334	GO:0003334	keratinocyte development	1/487	12/18866	0.269426	0.637848	0.579719	EXPH5	1
GO:0006534	GO:0006534	cysteine metabolic process	1/487	12/18866	0.269426	0.637848	0.579719	SLC7A11	1
GO:0007320	GO:0007320	insemination	1/487	12/18866	0.269426	0.637848	0.579719	OXTR	1
GO:0015824	GO:0015824	proline transport	1/487	12/18866	0.269426	0.637848	0.579719	SLC36A3	1
GO:0021702	GO:0021702	cerebellar Purkinje cell differentiation	1/487	12/18866	0.269426	0.637848	0.579719	RORA	1
GO:0021819	GO:0021819	layer formation in cerebral cortex	1/487	12/18866	0.269426	0.637848	0.579719	CDK5R1	1
GO:0021889	GO:0021889	olfactory bulb interneuron differentiation	1/487	12/18866	0.269426	0.637848	0.579719	WNT5A	1
GO:0030157	GO:0030157	pancreatic juice secretion	1/487	12/18866	0.269426	0.637848	0.579719	STK39	1
GO:0030311	GO:0030311	poly-N-acetyllactosamine biosynthetic process	1/487	12/18866	0.269426	0.637848	0.579719	B3GNT7	1
GO:0031340	GO:0031340	positive regulation of vesicle fusion	1/487	12/18866	0.269426	0.637848	0.579719	SYT9	1
GO:0032490	GO:0032490	detection of molecule of bacterial origin	1/487	12/18866	0.269426	0.637848	0.579719	TLR1	1
GO:0033004	GO:0033004	negative regulation of mast cell activation	1/487	12/18866	0.269426	0.637848	0.579719	CNR2	1
GO:0033182	GO:0033182	regulation of histone ubiquitination	1/487	12/18866	0.269426	0.637848	0.579719	CDK9	1
GO:0033523	GO:0033523	histone H2B ubiquitination	1/487	12/18866	0.269426	0.637848	0.579719	CDK9	1
GO:0033700	GO:0033700	phospholipid efflux	1/487	12/18866	0.269426	0.637848	0.579719	APOA1	1
GO:0035092	GO:0035092	sperm chromatin condensation	1/487	12/18866	0.269426	0.637848	0.579719	TSSK6	1
GO:0035739	GO:0035739	CD4-positive, alpha-beta T cell proliferation	1/487	12/18866	0.269426	0.637848	0.579719	CD274	1
GO:0035766	GO:0035766	cell chemotaxis to fibroblast growth factor	1/487	12/18866	0.269426	0.637848	0.579719	FGF2	1
GO:0035845	GO:0035845	photoreceptor cell outer segment organization	1/487	12/18866	0.269426	0.637848	0.579719	IFT20	1
GO:0038003	GO:0038003	opioid receptor signaling pathway	1/487	12/18866	0.269426	0.637848	0.579719	ADCY8	1
GO:0042178	GO:0042178	xenobiotic catabolic process	1/487	12/18866	0.269426	0.637848	0.579719	ACAA1	1
GO:0042368	GO:0042368	vitamin D biosynthetic process	1/487	12/18866	0.269426	0.637848	0.579719	CYP3A4	1
GO:0042416	GO:0042416	dopamine biosynthetic process	1/487	12/18866	0.269426	0.637848	0.579719	GCH1	1
GO:0042492	GO:0042492	gamma-delta T cell differentiation	1/487	12/18866	0.269426	0.637848	0.579719	NCKAP1L	1
GO:0042711	GO:0042711	maternal behavior	1/487	12/18866	0.269426	0.637848	0.579719	OXTR	1
GO:0043301	GO:0043301	negative regulation of leukocyte degranulation	1/487	12/18866	0.269426	0.637848	0.579719	BCR	1
GO:0043476	GO:0043476	pigment accumulation	1/487	12/18866	0.269426	0.637848	0.579719	SHROOM2	1
GO:0043482	GO:0043482	cellular pigment accumulation	1/487	12/18866	0.269426	0.637848	0.579719	SHROOM2	1
GO:0046185	GO:0046185	aldehyde catabolic process	1/487	12/18866	0.269426	0.637848	0.579719	PDXP	1
GO:0046322	GO:0046322	negative regulation of fatty acid oxidation	1/487	12/18866	0.269426	0.637848	0.579719	PLIN5	1
GO:0051340	GO:0051340	regulation of ligase activity	1/487	12/18866	0.269426	0.637848	0.579719	NHEJ1	1
GO:0051798	GO:0051798	positive regulation of hair follicle development	1/487	12/18866	0.269426	0.637848	0.579719	WNT5A	1
GO:0055062	GO:0055062	phosphate ion homeostasis	1/487	12/18866	0.269426	0.637848	0.579719	SFRP4	1
GO:0060081	GO:0060081	membrane hyperpolarization	1/487	12/18866	0.269426	0.637848	0.579719	PRKCZ	1
GO:0060394	GO:0060394	negative regulation of pathway-restricted SMAD protein phosphorylation	1/487	12/18866	0.269426	0.637848	0.579719	SMAD6	1
GO:0060746	GO:0060746	parental behavior	1/487	12/18866	0.269426	0.637848	0.579719	OXTR	1
GO:0060900	GO:0060900	embryonic camera-type eye formation	1/487	12/18866	0.269426	0.637848	0.579719	WNT5A	1
GO:0061365	GO:0061365	positive regulation of triglyceride lipase activity	1/487	12/18866	0.269426	0.637848	0.579719	APOA1	1
GO:0070243	GO:0070243	regulation of thymocyte apoptotic process	1/487	12/18866	0.269426	0.637848	0.579719	WNT5A	1
GO:0070269	GO:0070269	pyroptosis	1/487	12/18866	0.269426	0.637848	0.579719	ZBP1	1
GO:0070278	GO:0070278	extracellular matrix constituent secretion	1/487	12/18866	0.269426	0.637848	0.579719	RGCC	1
GO:0070572	GO:0070572	positive regulation of neuron projection regeneration	1/487	12/18866	0.269426	0.637848	0.579719	CNTF	1
GO:0070586	GO:0070586	cell-cell adhesion involved in gastrulation	1/487	12/18866	0.269426	0.637848	0.579719	APOA1	1
GO:0070816	GO:0070816	phosphorylation of RNA polymerase II C-terminal domain	1/487	12/18866	0.269426	0.637848	0.579719	CDK9	1
GO:0070857	GO:0070857	regulation of bile acid biosynthetic process	1/487	12/18866	0.269426	0.637848	0.579719	CES1	1
GO:0071044	GO:0071044	histone mRNA catabolic process	1/487	12/18866	0.269426	0.637848	0.579719	EXOSC4	1
GO:0071073	GO:0071073	positive regulation of phospholipid biosynthetic process	1/487	12/18866	0.269426	0.637848	0.579719	FPR2	1
GO:0071468	GO:0071468	cellular response to acidic pH	1/487	12/18866	0.269426	0.637848	0.579719	NOX1	1
GO:0071472	GO:0071472	cellular response to salt stress	1/487	12/18866	0.269426	0.637848	0.579719	TRPV4	1
GO:0072505	GO:0072505	divalent inorganic anion homeostasis	1/487	12/18866	0.269426	0.637848	0.579719	SFRP4	1
GO:0072506	GO:0072506	trivalent inorganic anion homeostasis	1/487	12/18866	0.269426	0.637848	0.579719	SFRP4	1
GO:0072537	GO:0072537	fibroblast activation	1/487	12/18866	0.269426	0.637848	0.579719	RGCC	1
GO:0072540	GO:0072540	T-helper 17 cell lineage commitment	1/487	12/18866	0.269426	0.637848	0.579719	IRF4	1
GO:0072584	GO:0072584	caveolin-mediated endocytosis	1/487	12/18866	0.269426	0.637848	0.579719	MLC1	1
GO:0086067	GO:0086067	AV node cell to bundle of His cell communication	1/487	12/18866	0.269426	0.637848	0.579719	GJC1	1
GO:0090209	GO:0090209	negative regulation of triglyceride metabolic process	1/487	12/18866	0.269426	0.637848	0.579719	PLIN5	1
GO:0097284	GO:0097284	hepatocyte apoptotic process	1/487	12/18866	0.269426	0.637848	0.579719	KRT8	1
GO:0098885	GO:0098885	modification of postsynaptic actin cytoskeleton	1/487	12/18866	0.269426	0.637848	0.579719	PFN2	1
GO:1901503	GO:1901503	ether biosynthetic process	1/487	12/18866	0.269426	0.637848	0.579719	ALOX5	1
GO:1901660	GO:1901660	calcium ion export	1/487	12/18866	0.269426	0.637848	0.579719	RGS9	1
GO:1902018	GO:1902018	negative regulation of cilium assembly	1/487	12/18866	0.269426	0.637848	0.579719	TBC1D30	1
GO:1903909	GO:1903909	regulation of receptor clustering	1/487	12/18866	0.269426	0.637848	0.579719	SLC7A11	1
GO:1904847	GO:1904847	regulation of cell chemotaxis to fibroblast growth factor	1/487	12/18866	0.269426	0.637848	0.579719	FGF2	1
GO:1905522	GO:1905522	negative regulation of macrophage migration	1/487	12/18866	0.269426	0.637848	0.579719	CD200R1	1
GO:2000105	GO:2000105	positive regulation of DNA-dependent DNA replication	1/487	12/18866	0.269426	0.637848	0.579719	E2F8	1
GO:2000302	GO:2000302	positive regulation of synaptic vesicle exocytosis	1/487	12/18866	0.269426	0.637848	0.579719	SYT9	1
GO:2000561	GO:2000561	regulation of CD4-positive, alpha-beta T cell proliferation	1/487	12/18866	0.269426	0.637848	0.579719	CD274	1
GO:2000650	GO:2000650	negative regulation of sodium ion transmembrane transporter activity	1/487	12/18866	0.269426	0.637848	0.579719	STK39	1
GO:2001223	GO:2001223	negative regulation of neuron migration	1/487	12/18866	0.269426	0.637848	0.579719	GPR173	1
GO:0043502	GO:0043502	regulation of muscle adaptation	4/487	102/18866	0.269887	0.637848	0.579719	CDK9/FOXO1/IL6ST/NOS3	4
GO:0060840	GO:0060840	artery development	4/487	102/18866	0.269887	0.637848	0.579719	HECTD1/SMAD6/NGFR/WNT11	4
GO:0150115	GO:0150115	cell-substrate junction organization	4/487	102/18866	0.269887	0.637848	0.579719	BCR/MAPRE2/DLC1/THY1	4
GO:0003158	GO:0003158	endothelium development	5/487	135/18866	0.270035	0.637848	0.579719	ACVR1/GPX1/IKBKB/TNMD/COL22A1	5
GO:0006414	GO:0006414	translational elongation	5/487	135/18866	0.270035	0.637848	0.579719	ABTB1/MRPL24/MRPL53/MRPS7/SECISBP2	5
GO:0032368	GO:0032368	regulation of lipid transport	5/487	135/18866	0.270035	0.637848	0.579719	APOA1/CES1/CRY1/ITGB3/MAP2K6	5
GO:0046939	GO:0046939	nucleotide phosphorylation	5/487	135/18866	0.270035	0.637848	0.579719	ALDOC/ENO2/FBP1/HK2/NUP155	5
GO:0003143	GO:0003143	embryonic heart tube morphogenesis	3/487	70/18866	0.270433	0.637848	0.579719	ACVR1/WNT5A/VANGL2	3
GO:0006901	GO:0006901	vesicle coating	3/487	70/18866	0.270433	0.637848	0.579719	PREB/SAR1B/COL7A1	3
GO:0032370	GO:0032370	positive regulation of lipid transport	3/487	70/18866	0.270433	0.637848	0.579719	APOA1/CES1/MAP2K6	3
GO:0043967	GO:0043967	histone H4 acetylation	3/487	70/18866	0.270433	0.637848	0.579719	ACTL6A/IRF4/NAA40	3
GO:0045088	GO:0045088	regulation of innate immune response	10/487	307/18866	0.271215	0.637848	0.579719	HMGB3/IKBKB/PSMD11/PSMD13/PYHIN1/WNT5A/FPR2/GBP5/TREML4/ZBP1	10
GO:0016125	GO:0016125	sterol metabolic process	6/487	169/18866	0.271851	0.637848	0.579719	APOA1/CES1/CYP3A4/LRP5/OSBPL5/SMPD1	6
GO:0055002	GO:0055002	striated muscle cell development	6/487	169/18866	0.271851	0.637848	0.579719	GPX1/KRT8/MYLK3/SKI/TMOD1/SHOX2	6
GO:0010594	GO:0010594	regulation of endothelial cell migration	8/487	238/18866	0.273627	0.637848	0.579719	ANGPT4/ITGB3/NOS3/RGCC/SEMA4A/WNT5A/FGF2/RHOJ	8
GO:0016042	GO:0016042	lipid catabolic process	11/487	343/18866	0.273818	0.637848	0.579719	ACAA1/ALDH3A2/APOA1/CES1/CYP3A4/MMAA/PLCB4/PLD2/PLIN5/SMPD1/YWHAH	11
GO:0009135	GO:0009135	purine nucleoside diphosphate metabolic process	5/487	136/18866	0.274981	0.637848	0.579719	ALDOC/ENO2/FBP1/HK2/NUP155	5
GO:0009179	GO:0009179	purine ribonucleoside diphosphate metabolic process	5/487	136/18866	0.274981	0.637848	0.579719	ALDOC/ENO2/FBP1/HK2/NUP155	5
GO:0045727	GO:0045727	positive regulation of translation	5/487	136/18866	0.274981	0.637848	0.579719	BCL3/HABP4/MIF4GD/RPUSD4/SAMD4A	5
GO:0006885	GO:0006885	regulation of pH	4/487	103/18866	0.275624	0.637848	0.579719	ATP6V1A/ATP6V1F/NOX1/SLC4A3	4
GO:0034766	GO:0034766	negative regulation of ion transmembrane transport	4/487	103/18866	0.275624	0.637848	0.579719	GPR35/STK39/TLR9/ANO9	4
GO:0042472	GO:0042472	inner ear morphogenesis	4/487	103/18866	0.275624	0.637848	0.579719	BCR/SOBP/WNT5A/VANGL2	4
GO:1901890	GO:1901890	positive regulation of cell junction assembly	4/487	103/18866	0.275624	0.637848	0.579719	OXTR/SEMA4A/THY1/NTRK2	4
GO:2000241	GO:2000241	regulation of reproductive process	6/487	170/18866	0.276259	0.637848	0.579719	ASTL/NPR2/OXTR/WNT5A/FBXO43/FAM170B	6
GO:0000096	GO:0000096	sulfur amino acid metabolic process	2/487	40/18866	0.276352	0.637848	0.579719	MAT1A/SLC7A11	2
GO:0010613	GO:0010613	positive regulation of cardiac muscle hypertrophy	2/487	40/18866	0.276352	0.637848	0.579719	CDK9/IL6ST	2
GO:0030488	GO:0030488	tRNA methylation	2/487	40/18866	0.276352	0.637848	0.579719	METTL1/METTL2A	2
GO:0030501	GO:0030501	positive regulation of bone mineralization	2/487	40/18866	0.276352	0.637848	0.579719	ACVR1/ALOX5	2
GO:0034314	GO:0034314	Arp2/3 complex-mediated actin nucleation	2/487	40/18866	0.276352	0.637848	0.579719	WHAMMP3/HIP1R	2
GO:0042417	GO:0042417	dopamine metabolic process	2/487	40/18866	0.276352	0.637848	0.579719	GCH1/ITGAM	2
GO:0043902	GO:0043902	positive regulation of multi-organism process	2/487	40/18866	0.276352	0.637848	0.579719	OXTR/FAM170B	2
GO:0051281	GO:0051281	positive regulation of release of sequestered calcium ion into cytosol	2/487	40/18866	0.276352	0.637848	0.579719	F2/THY1	2
GO:0090184	GO:0090184	positive regulation of kidney development	2/487	40/18866	0.276352	0.637848	0.579719	PDGFD/SOX8	2
GO:0140353	GO:0140353	lipid export from cell	2/487	40/18866	0.276352	0.637848	0.579719	CRY1/MAP2K6	2
GO:1903311	GO:1903311	regulation of mRNA metabolic process	11/487	344/18866	0.276885	0.637848	0.579719	CDK9/EXOSC4/NCBP1/NSRP1/PSMD11/PSMD13/RBFOX3/RBM15B/SAMD4A/SECISBP2/TBRG4	11
GO:2000116	GO:2000116	regulation of cysteine-type endopeptidase activity	8/487	239/18866	0.277326	0.637848	0.579719	EGLN3/GPX1/NOD1/TNFSF14/DLC1/NGFR/VIL1/HIP1R	8
GO:0015800	GO:0015800	acidic amino acid transport	3/487	71/18866	0.277461	0.637848	0.579719	LRRC8D/NTRK2/SLC7A11	3
GO:0050891	GO:0050891	multicellular organismal water homeostasis	3/487	71/18866	0.277461	0.637848	0.579719	TRPV4/ADCY1/ADCY8	3
GO:0061180	GO:0061180	mammary gland epithelium development	3/487	71/18866	0.277461	0.637848	0.579719	GPX1/LRP5/WNT5A	3
GO:0030307	GO:0030307	positive regulation of cell growth	6/487	171/18866	0.280683	0.637848	0.579719	CDH4/CRABP2/EXOSC4/HBEGF/NCBP1/F2	6
GO:1905952	GO:1905952	regulation of lipid localization	6/487	171/18866	0.280683	0.637848	0.579719	APOA1/CES1/CRY1/ITGB3/MAP2K6/PLIN5	6
GO:0001824	GO:0001824	blastocyst development	4/487	104/18866	0.281381	0.637848	0.579719	ACTL6A/GINS4/NASP/NCAPG2	4
GO:0002456	GO:0002456	T cell mediated immunity	4/487	104/18866	0.281381	0.637848	0.579719	IL20RB/IL7R/RSAD2/PRKCZ	4
GO:0006892	GO:0006892	post-Golgi vesicle-mediated transport	4/487	104/18866	0.281381	0.637848	0.579719	GOLPH3L/KIF13A/OSBPL5/RAB26	4
GO:0050673	GO:0050673	epithelial cell proliferation	14/487	453/18866	0.283113	0.637848	0.579719	ALOX5/APOA1/CDH13/GPX1/ITGB3/LRG1/RGCC/WNT5A/APLN/FGF2/NGFR/SGPP2/TNMD/PROK2	14
GO:0050852	GO:0050852	T cell receptor signaling pathway	7/487	206/18866	0.283574	0.637848	0.579719	BTN3A1/IKBKB/PSMD11/PSMD13/SLA2/BTNL3/THY1	7
GO:0006909	GO:0006909	phagocytosis	12/487	382/18866	0.284463	0.637848	0.579719	AHSG/ALOX15/APOA1/BCR/ITGAM/ITGB3/NCKAP1L/PLD2/RARA/SPON2/TGM2/FPR2	12
GO:0045600	GO:0045600	positive regulation of fat cell differentiation	3/487	72/18866	0.284507	0.637848	0.579719	LRP5/ZBTB16/FNDC5	3
GO:1904427	GO:1904427	positive regulation of calcium ion transmembrane transport	3/487	72/18866	0.284507	0.637848	0.579719	CALCR/F2/THY1	3
GO:0006638	GO:0006638	neutral lipid metabolic process	5/487	138/18866	0.284927	0.637848	0.579719	APOA1/CYP2E1/GPAT2/GPX1/PLIN5	5
GO:0006639	GO:0006639	acylglycerol metabolic process	5/487	138/18866	0.284927	0.637848	0.579719	APOA1/CYP2E1/GPAT2/GPX1/PLIN5	5
GO:0014742	GO:0014742	positive regulation of muscle hypertrophy	2/487	41/18866	0.285974	0.637848	0.579719	CDK9/IL6ST	2
GO:0030890	GO:0030890	positive regulation of B cell proliferation	2/487	41/18866	0.285974	0.637848	0.579719	NCKAP1L/TLR9	2
GO:0038083	GO:0038083	peptidyl-tyrosine autophosphorylation	2/487	41/18866	0.285974	0.637848	0.579719	AATK/FRK	2
GO:0043267	GO:0043267	negative regulation of potassium ion transport	2/487	41/18866	0.285974	0.637848	0.579719	NOS3/STK39	2
GO:0050434	GO:0050434	positive regulation of viral transcription	2/487	41/18866	0.285974	0.637848	0.579719	CDK9/POLR2H	2
GO:0050832	GO:0050832	defense response to fungus	2/487	41/18866	0.285974	0.637848	0.579719	IL17RC/SPON2	2
GO:0051693	GO:0051693	actin filament capping	2/487	41/18866	0.285974	0.637848	0.579719	TMOD1/VIL1	2
GO:1901998	GO:1901998	toxin transport	2/487	41/18866	0.285974	0.637848	0.579719	CD274/LRP5	2
GO:1902042	GO:1902042	negative regulation of extrinsic apoptotic signaling pathway via death domain receptors	2/487	41/18866	0.285974	0.637848	0.579719	GPX1/NOS3	2
GO:1903170	GO:1903170	negative regulation of calcium ion transmembrane transport	2/487	41/18866	0.285974	0.637848	0.579719	GPR35/TLR9	2
GO:0010506	GO:0010506	regulation of autophagy	11/487	347/18866	0.286147	0.637848	0.579719	ADPRH/ATP6V1A/CDK5R1/CISD2/FOXO1/HK2/IFT20/MLST8/NOD1/TP53INP1/TRIML2	11
GO:0002824	GO:0002824	positive regulation of adaptive immune response based on somatic recombination of immune receptors built from immunoglobulin superfamily domains	4/487	105/18866	0.287156	0.637848	0.579719	CD274/IL27RA/RSAD2/PRKCZ	4
GO:0007631	GO:0007631	feeding behavior	4/487	105/18866	0.287156	0.637848	0.579719	BBS12/OXTR/APLN/NTRK2	4
GO:0030301	GO:0030301	cholesterol transport	4/487	105/18866	0.287156	0.637848	0.579719	APOA1/CES1/OSBPL5/APOM	4
GO:0031532	GO:0031532	actin cytoskeleton reorganization	4/487	105/18866	0.287156	0.637848	0.579719	CAPN10/GAB1/PARVB/TRPV4	4
GO:0062014	GO:0062014	negative regulation of small molecule metabolic process	4/487	105/18866	0.287156	0.637848	0.579719	CRY1/FBP1/PGP/PLIN5	4
GO:0070588	GO:0070588	calcium ion transmembrane transport	10/487	312/18866	0.287488	0.637848	0.579719	GPR35/MCOLN2/TLR9/TRPV4/CALCR/F2/FGF2/THY1/CACNG5/RGS9	10
GO:1901343	GO:1901343	negative regulation of vasculature development	7/487	207/18866	0.287621	0.637848	0.579719	ALOX5/ANGPT4/RGCC/SEMA4A/SPINK5/NGFR/TNMD	7
GO:0000212	GO:0000212	meiotic spindle organization	1/487	13/18866	0.288297	0.637848	0.579719	TUBG1	1
GO:0001967	GO:0001967	suckling behavior	1/487	13/18866	0.288297	0.637848	0.579719	OXTR	1
GO:0002638	GO:0002638	negative regulation of immunoglobulin production	1/487	13/18866	0.288297	0.637848	0.579719	CD22	1
GO:0002674	GO:0002674	negative regulation of acute inflammatory response	1/487	13/18866	0.288297	0.637848	0.579719	IL20RB	1
GO:0002836	GO:0002836	positive regulation of response to tumor cell	1/487	13/18866	0.288297	0.637848	0.579719	CD274	1
GO:0002839	GO:0002839	positive regulation of immune response to tumor cell	1/487	13/18866	0.288297	0.637848	0.579719	CD274	1
GO:0002921	GO:0002921	negative regulation of humoral immune response	1/487	13/18866	0.288297	0.637848	0.579719	SPINK5	1
GO:0005513	GO:0005513	detection of calcium ion	1/487	13/18866	0.288297	0.637848	0.579719	KCNMB4	1
GO:0006264	GO:0006264	mitochondrial DNA replication	1/487	13/18866	0.288297	0.637848	0.579719	METTL4	1
GO:0006684	GO:0006684	sphingomyelin metabolic process	1/487	13/18866	0.288297	0.637848	0.579719	SMPD1	1
GO:0007171	GO:0007171	activation of transmembrane receptor protein tyrosine kinase activity	1/487	13/18866	0.288297	0.637848	0.579719	ANGPT4	1
GO:0007183	GO:0007183	SMAD protein complex assembly	1/487	13/18866	0.288297	0.637848	0.579719	SMAD6	1
GO:0007494	GO:0007494	midgut development	1/487	13/18866	0.288297	0.637848	0.579719	WNT5A	1
GO:0008228	GO:0008228	opsonization	1/487	13/18866	0.288297	0.637848	0.579719	SPON2	1
GO:0009143	GO:0009143	nucleoside triphosphate catabolic process	1/487	13/18866	0.288297	0.637848	0.579719	ENTPD3	1
GO:0009650	GO:0009650	UV protection	1/487	13/18866	0.288297	0.637848	0.579719	GPX1	1
GO:0010459	GO:0010459	negative regulation of heart rate	1/487	13/18866	0.288297	0.637848	0.579719	RNLS	1
GO:0010642	GO:0010642	negative regulation of platelet-derived growth factor receptor signaling pathway	1/487	13/18866	0.288297	0.637848	0.579719	PTGIR	1
GO:0010745	GO:0010745	negative regulation of macrophage derived foam cell differentiation	1/487	13/18866	0.288297	0.637848	0.579719	ITGB3	1
GO:0014842	GO:0014842	regulation of skeletal muscle satellite cell proliferation	1/487	13/18866	0.288297	0.637848	0.579719	FGF2	1
GO:0015801	GO:0015801	aromatic amino acid transport	1/487	13/18866	0.288297	0.637848	0.579719	SLC16A10	1
GO:0015816	GO:0015816	glycine transport	1/487	13/18866	0.288297	0.637848	0.579719	SLC36A3	1
GO:0016264	GO:0016264	gap junction assembly	1/487	13/18866	0.288297	0.637848	0.579719	GJC1	1
GO:0018206	GO:0018206	peptidyl-methionine modification	1/487	13/18866	0.288297	0.637848	0.579719	APOA1	1
GO:0021554	GO:0021554	optic nerve development	1/487	13/18866	0.288297	0.637848	0.579719	LPAR1	1
GO:0021694	GO:0021694	cerebellar Purkinje cell layer formation	1/487	13/18866	0.288297	0.637848	0.579719	RORA	1
GO:0030309	GO:0030309	poly-N-acetyllactosamine metabolic process	1/487	13/18866	0.288297	0.637848	0.579719	B3GNT7	1
GO:0031053	GO:0031053	primary miRNA processing	1/487	13/18866	0.288297	0.637848	0.579719	DROSHA	1
GO:0031115	GO:0031115	negative regulation of microtubule polymerization	1/487	13/18866	0.288297	0.637848	0.579719	CLIP3	1
GO:0031126	GO:0031126	snoRNA 3'-end processing	1/487	13/18866	0.288297	0.637848	0.579719	EXOSC4	1
GO:0031650	GO:0031650	regulation of heat generation	1/487	13/18866	0.288297	0.637848	0.579719	APLN	1
GO:0032230	GO:0032230	positive regulation of synaptic transmission, GABAergic	1/487	13/18866	0.288297	0.637848	0.579719	OXTR	1
GO:0032493	GO:0032493	response to bacterial lipoprotein	1/487	13/18866	0.288297	0.637848	0.579719	TLR1	1
GO:0032530	GO:0032530	regulation of microvillus organization	1/487	13/18866	0.288297	0.637848	0.579719	VIL1	1
GO:0032536	GO:0032536	regulation of cell projection size	1/487	13/18866	0.288297	0.637848	0.579719	VIL1	1
GO:0032725	GO:0032725	positive regulation of granulocyte macrophage colony-stimulating factor production	1/487	13/18866	0.288297	0.637848	0.579719	TLR9	1
GO:0033127	GO:0033127	regulation of histone phosphorylation	1/487	13/18866	0.288297	0.637848	0.579719	CDK9	1
GO:0033605	GO:0033605	positive regulation of catecholamine secretion	1/487	13/18866	0.288297	0.637848	0.579719	OXTR	1
GO:0034370	GO:0034370	triglyceride-rich lipoprotein particle remodeling	1/487	13/18866	0.288297	0.637848	0.579719	APOA1	1
GO:0036109	GO:0036109	alpha-linolenic acid metabolic process	1/487	13/18866	0.288297	0.637848	0.579719	ACAA1	1
GO:0042538	GO:0042538	hyperosmotic salinity response	1/487	13/18866	0.288297	0.637848	0.579719	TRPV4	1
GO:0042635	GO:0042635	positive regulation of hair cycle	1/487	13/18866	0.288297	0.637848	0.579719	WNT5A	1
GO:0045579	GO:0045579	positive regulation of B cell differentiation	1/487	13/18866	0.288297	0.637848	0.579719	NCKAP1L	1
GO:0045741	GO:0045741	positive regulation of epidermal growth factor-activated receptor activity	1/487	13/18866	0.288297	0.637848	0.579719	HBEGF	1
GO:0046415	GO:0046415	urate metabolic process	1/487	13/18866	0.288297	0.637848	0.579719	SLC2A9	1
GO:0048302	GO:0048302	regulation of isotype switching to IgG isotypes	1/487	13/18866	0.288297	0.637848	0.579719	IL27RA	1
GO:0048548	GO:0048548	regulation of pinocytosis	1/487	13/18866	0.288297	0.637848	0.579719	ACTN4	1
GO:0048711	GO:0048711	positive regulation of astrocyte differentiation	1/487	13/18866	0.288297	0.637848	0.579719	IL6ST	1
GO:0048934	GO:0048934	peripheral nervous system neuron differentiation	1/487	13/18866	0.288297	0.637848	0.579719	NTRK2	1
GO:0048935	GO:0048935	peripheral nervous system neuron development	1/487	13/18866	0.288297	0.637848	0.579719	NTRK2	1
GO:0051001	GO:0051001	negative regulation of nitric-oxide synthase activity	1/487	13/18866	0.288297	0.637848	0.579719	CNR2	1
GO:0055091	GO:0055091	phospholipid homeostasis	1/487	13/18866	0.288297	0.637848	0.579719	APOA1	1
GO:0060100	GO:0060100	positive regulation of phagocytosis, engulfment	1/487	13/18866	0.288297	0.637848	0.579719	NCKAP1L	1
GO:0060312	GO:0060312	regulation of blood vessel remodeling	1/487	13/18866	0.288297	0.637848	0.579719	BCR	1
GO:0061043	GO:0061043	regulation of vascular wound healing	1/487	13/18866	0.288297	0.637848	0.579719	ALOX5	1
GO:0061469	GO:0061469	regulation of type B pancreatic cell proliferation	1/487	13/18866	0.288297	0.637848	0.579719	SGPP2	1
GO:0070839	GO:0070839	divalent metal ion export	1/487	13/18866	0.288297	0.637848	0.579719	RGS9	1
GO:0071027	GO:0071027	nuclear RNA surveillance	1/487	13/18866	0.288297	0.637848	0.579719	EXOSC4	1
GO:0071028	GO:0071028	nuclear mRNA surveillance	1/487	13/18866	0.288297	0.637848	0.579719	EXOSC4	1
GO:0072578	GO:0072578	neurotransmitter-gated ion channel clustering	1/487	13/18866	0.288297	0.637848	0.579719	SLC7A11	1
GO:0072683	GO:0072683	T cell extravasation	1/487	13/18866	0.288297	0.637848	0.579719	IL27RA	1
GO:0098712	GO:0098712	L-glutamate import across plasma membrane	1/487	13/18866	0.288297	0.637848	0.579719	SLC7A11	1
GO:0098789	GO:0098789	pre-mRNA cleavage required for polyadenylation	1/487	13/18866	0.288297	0.637848	0.579719	NCBP1	1
GO:0099566	GO:0099566	regulation of postsynaptic cytosolic calcium ion concentration	1/487	13/18866	0.288297	0.637848	0.579719	WNT5A	1
GO:1900025	GO:1900025	negative regulation of substrate adhesion-dependent cell spreading	1/487	13/18866	0.288297	0.637848	0.579719	ACTN4	1
GO:1902306	GO:1902306	negative regulation of sodium ion transmembrane transport	1/487	13/18866	0.288297	0.637848	0.579719	STK39	1
GO:1902947	GO:1902947	regulation of tau-protein kinase activity	1/487	13/18866	0.288297	0.637848	0.579719	NAB2	1
GO:1905155	GO:1905155	positive regulation of membrane invagination	1/487	13/18866	0.288297	0.637848	0.579719	NCKAP1L	1
GO:2000052	GO:2000052	positive regulation of non-canonical Wnt signaling pathway	1/487	13/18866	0.288297	0.637848	0.579719	WNT5A	1
GO:2000121	GO:2000121	regulation of removal of superoxide radicals	1/487	13/18866	0.288297	0.637848	0.579719	GCH1	1
GO:2000344	GO:2000344	positive regulation of acrosome reaction	1/487	13/18866	0.288297	0.637848	0.579719	FAM170B	1
GO:0098742	GO:0098742	cell-cell adhesion via plasma-membrane adhesion molecules	9/487	277/18866	0.288344	0.637848	0.579719	ACVR1/APOA1/CDH13/CDH4/ITGAM/LRFN5/PCDHAC2/PCDHGC5/LRRC4C	9
GO:0006633	GO:0006633	fatty acid biosynthetic process	6/487	173/18866	0.289579	0.639916	0.581599	ALOX15/ALOX5/APOA1/CYP2E1/CYP3A4/ACSM5	6
GO:0021543	GO:0021543	pallium development	6/487	173/18866	0.289579	0.639916	0.581599	ALK/CDK5R1/CDON/RARA/KCNA1/NTRK2	6
GO:0009185	GO:0009185	ribonucleoside diphosphate metabolic process	5/487	139/18866	0.289925	0.640338	0.581982	ALDOC/ENO2/FBP1/HK2/NUP155	5
GO:0010611	GO:0010611	regulation of cardiac muscle hypertrophy	3/487	73/18866	0.291567	0.640338	0.581982	CDK9/FOXO1/IL6ST	3
GO:0042795	GO:0042795	snRNA transcription by RNA polymerase II	3/487	73/18866	0.291567	0.640338	0.581982	CDK9/NCBP1/POLR2H	3
GO:0051155	GO:0051155	positive regulation of striated muscle cell differentiation	3/487	73/18866	0.291567	0.640338	0.581982	MYLK3/TNFSF14/SHOX2	3
GO:0070227	GO:0070227	lymphocyte apoptotic process	3/487	73/18866	0.291567	0.640338	0.581982	CD274/IL7R/WNT5A	3
GO:0072078	GO:0072078	nephron tubule morphogenesis	3/487	73/18866	0.291567	0.640338	0.581982	FGF2/WNT11/SOX8	3
GO:0072401	GO:0072401	signal transduction involved in DNA integrity checkpoint	3/487	73/18866	0.291567	0.640338	0.581982	PLAGL1/RGCC/E2F8	3
GO:0072422	GO:0072422	signal transduction involved in DNA damage checkpoint	3/487	73/18866	0.291567	0.640338	0.581982	PLAGL1/RGCC/E2F8	3
GO:0090114	GO:0090114	COPII-coated vesicle budding	3/487	73/18866	0.291567	0.640338	0.581982	PREB/SAR1B/COL7A1	3
GO:1901292	GO:1901292	nucleoside phosphate catabolic process	3/487	73/18866	0.291567	0.640338	0.581982	ENTPD3/GPX1/NUDT11	3
GO:1902036	GO:1902036	regulation of hematopoietic stem cell differentiation	3/487	73/18866	0.291567	0.640338	0.581982	PSMD11/PSMD13/TAL1	3
GO:1903779	GO:1903779	regulation of cardiac conduction	3/487	73/18866	0.291567	0.640338	0.581982	FXYD2/NPR2/FXYD7	3
GO:0019395	GO:0019395	fatty acid oxidation	4/487	106/18866	0.292948	0.641569	0.583101	ACAA1/ALDH3A2/ALOX15/PLIN5	4
GO:0034446	GO:0034446	substrate adhesion-dependent cell spreading	4/487	106/18866	0.292948	0.641569	0.583101	ACTN4/APOA1/ITGB3/PARVB	4
GO:0046928	GO:0046928	regulation of neurotransmitter secretion	4/487	106/18866	0.292948	0.641569	0.583101	KCNMB4/PFN2/ADCY1/SYT9	4
GO:0071868	GO:0071868	cellular response to monoamine stimulus	4/487	106/18866	0.292948	0.641569	0.583101	ALK/HTR7/GNA14/RGS9	4
GO:0071870	GO:0071870	cellular response to catecholamine stimulus	4/487	106/18866	0.292948	0.641569	0.583101	ALK/HTR7/GNA14/RGS9	4
GO:0097696	GO:0097696	receptor signaling pathway via STAT	6/487	174/18866	0.294048	0.641569	0.583101	BCL3/CDK5R1/CNTF/IL6ST/IL7R/F2	6
GO:0002707	GO:0002707	negative regulation of lymphocyte mediated immunity	2/487	42/18866	0.295582	0.641569	0.583101	IL20RB/IL7R	2
GO:0072595	GO:0072595	maintenance of protein localization in organelle	2/487	42/18866	0.295582	0.641569	0.583101	BCL3/HK2	2
GO:0035303	GO:0035303	regulation of dephosphorylation	7/487	209/18866	0.295756	0.641569	0.583101	CDCA2/IKBKB/NCKAP1L/SMPD1/DLC1/SH3RF2/PPP2R2B	7
GO:0007269	GO:0007269	neurotransmitter secretion	6/487	175/18866	0.298532	0.641569	0.583101	KCNMB4/PFN2/SYN3/ADCY1/STX19/SYT9	6
GO:0099643	GO:0099643	signal release from synapse	6/487	175/18866	0.298532	0.641569	0.583101	KCNMB4/PFN2/SYN3/ADCY1/STX19/SYT9	6
GO:0009301	GO:0009301	snRNA transcription	3/487	74/18866	0.298639	0.641569	0.583101	CDK9/NCBP1/POLR2H	3
GO:0032024	GO:0032024	positive regulation of insulin secretion	3/487	74/18866	0.298639	0.641569	0.583101	CAPN10/SYBU/ADCY8	3
GO:0032481	GO:0032481	positive regulation of type I interferon production	3/487	74/18866	0.298639	0.641569	0.583101	POLR2H/TLR9/ZBP1	3
GO:0043507	GO:0043507	positive regulation of JUN kinase activity	3/487	74/18866	0.298639	0.641569	0.583101	TLR9/WNT5A/VANGL2	3
GO:0048199	GO:0048199	vesicle targeting, to, from or within Golgi	3/487	74/18866	0.298639	0.641569	0.583101	PREB/SAR1B/COL7A1	3
GO:0072395	GO:0072395	signal transduction involved in cell cycle checkpoint	3/487	74/18866	0.298639	0.641569	0.583101	PLAGL1/RGCC/E2F8	3
GO:0086003	GO:0086003	cardiac muscle cell contraction	3/487	74/18866	0.298639	0.641569	0.583101	KCNJ5/NUP155/GJC1	3
GO:1903036	GO:1903036	positive regulation of response to wounding	3/487	74/18866	0.298639	0.641569	0.583101	CNTF/HBEGF/F2	3
GO:2001259	GO:2001259	positive regulation of cation channel activity	3/487	74/18866	0.298639	0.641569	0.583101	ARC/KCNA1/RGS9	3
GO:0043266	GO:0043266	regulation of potassium ion transport	4/487	107/18866	0.298756	0.641569	0.583101	NOS3/STK39/KCNS2/KCNA1	4
GO:0050905	GO:0050905	neuromuscular process	4/487	107/18866	0.298756	0.641569	0.583101	BCR/BLOC1S4/GCH1/KCNA1	4
GO:0099175	GO:0099175	regulation of postsynapse organization	4/487	107/18866	0.298756	0.641569	0.583101	ARC/CDK5R1/WNT5A/SLC7A11	4
GO:2001237	GO:2001237	negative regulation of extrinsic apoptotic signaling pathway	4/487	107/18866	0.298756	0.641569	0.583101	ACVR1/GPX1/IL1A/NOS3	4
GO:0051402	GO:0051402	neuron apoptotic process	8/487	245/18866	0.29979	0.641569	0.583101	AKT1S1/CDK5R1/CNTF/EGLN3/ITGAM/NES/NGFR/NTRK2	8
GO:0008584	GO:0008584	male gonad development	5/487	141/18866	0.299968	0.641569	0.583101	NASP/RARA/RRM1/WNT5A/SOX8	5
GO:0072659	GO:0072659	protein localization to plasma membrane	9/487	281/18866	0.302402	0.641569	0.583101	FCHO2/GOLPH3L/IFT20/IKBKB/KIF13A/CLIP3/VIL1/PRKCZ/RAB26	9
GO:0016241	GO:0016241	regulation of macroautophagy	6/487	176/18866	0.303029	0.641569	0.583101	ADPRH/ATP6V1A/CDK5R1/IFT20/MLST8/NOD1	6
GO:0072330	GO:0072330	monocarboxylic acid biosynthetic process	8/487	246/18866	0.303575	0.641569	0.583101	ALOX15/ALOX5/APOA1/CES1/CYP2E1/CYP3A4/RBP1/ACSM5	8
GO:0002703	GO:0002703	regulation of leukocyte mediated immunity	7/487	211/18866	0.303941	0.641569	0.583101	BCR/IL20RB/IL27RA/IL7R/ITGAM/RSAD2/PRKCZ	7
GO:0001909	GO:0001909	leukocyte mediated cytotoxicity	4/487	108/18866	0.304577	0.641569	0.583101	IL7R/ITGAM/ULBP1/F2	4
GO:0002062	GO:0002062	chondrocyte differentiation	4/487	108/18866	0.304577	0.641569	0.583101	AMELX/CHADL/SHOX2/ZBTB16	4
GO:0071887	GO:0071887	leukocyte apoptotic process	4/487	108/18866	0.304577	0.641569	0.583101	CD274/IL7R/WNT5A/SLC7A11	4
GO:1902750	GO:1902750	negative regulation of cell cycle G2/M phase transition	4/487	108/18866	0.304577	0.641569	0.583101	DONSON/PSMD11/PSMD13/HUS1B	4
GO:0046425	GO:0046425	regulation of receptor signaling pathway via JAK-STAT	5/487	142/18866	0.305011	0.641569	0.583101	BCL3/CDK5R1/CNTF/IL6ST/F2	5
GO:0046546	GO:0046546	development of primary male sexual characteristics	5/487	142/18866	0.305011	0.641569	0.583101	NASP/RARA/RRM1/WNT5A/SOX8	5
GO:0072073	GO:0072073	kidney epithelium development	5/487	142/18866	0.305011	0.641569	0.583101	RARA/SMAD6/FGF2/WNT11/SOX8	5
GO:0002369	GO:0002369	T cell cytokine production	2/487	43/18866	0.305172	0.641569	0.583101	RSAD2/PRKCZ	2
GO:0007339	GO:0007339	binding of sperm to zona pellucida	2/487	43/18866	0.305172	0.641569	0.583101	ASTL/CLGN	2
GO:0019432	GO:0019432	triglyceride biosynthetic process	2/487	43/18866	0.305172	0.641569	0.583101	GPAT2/PLIN5	2
GO:0021762	GO:0021762	substantia nigra development	2/487	43/18866	0.305172	0.641569	0.583101	GNB4/YWHAH	2
GO:0045823	GO:0045823	positive regulation of heart contraction	2/487	43/18866	0.305172	0.641569	0.583101	GCH1/APLN	2
GO:0046688	GO:0046688	response to copper ion	2/487	43/18866	0.305172	0.641569	0.583101	IL1A/MT1H	2
GO:0050856	GO:0050856	regulation of T cell receptor signaling pathway	2/487	43/18866	0.305172	0.641569	0.583101	SLA2/THY1	2
GO:0060119	GO:0060119	inner ear receptor cell development	2/487	43/18866	0.305172	0.641569	0.583101	IFT20/VANGL2	2
GO:0061462	GO:0061462	protein localization to lysosome	2/487	43/18866	0.305172	0.641569	0.583101	RNF128/CACNG5	2
GO:0090207	GO:0090207	regulation of triglyceride metabolic process	2/487	43/18866	0.305172	0.641569	0.583101	APOA1/PLIN5	2
GO:0002479	GO:0002479	antigen processing and presentation of exogenous peptide antigen via MHC class I, TAP-dependent	3/487	75/18866	0.30572	0.641569	0.583101	IKBKB/PSMD11/PSMD13	3
GO:0006353	GO:0006353	DNA-templated transcription, termination	3/487	75/18866	0.30572	0.641569	0.583101	NCBP1/POLR1A/POLR2H	3
GO:0032602	GO:0032602	chemokine production	3/487	75/18866	0.30572	0.641569	0.583101	MCOLN2/TLR9/TRPV4	3
GO:0043627	GO:0043627	response to estrogen	3/487	75/18866	0.30572	0.641569	0.583101	APOA1/RARA/SMAD6	3
GO:0046323	GO:0046323	glucose import	3/487	75/18866	0.30572	0.641569	0.583101	CAPN10/HK2/SLC2A3	3
[truncated: 2,277 more rows]
