# Supplementary material for: Direct contact between iPSC-derived macrophages and hepatocytes drives reciprocal acquisition of Kupffer cell identity and hepatocyte maturation
Source: bioRxiv preprint, doi:10.1101/2025.08.26.672295, version 2 (2026-04-01)
Supplement: Supp Table 10 [file 672295_file13.xlsx]

## Sheet: GO - coculture and LiverMac
	ID	Description	GeneRatio	BgRatio	pvalue	p.adjust	qvalue	geneID	Count
GO:0045785	GO:0045785	positive regulation of cell adhesion	35/724	428/18866	2.29687755943081e-05	0.0867841	0.0796598	ADAM8/ADGRG1/ANGPT1/BAD/BTLA/CAV1/CHRD/CITED2/CRKL/DMTN/DPP4/EDIL3/EGR3/IGF1/KIF26B/MYB/NOD2/PDCD1LG2/PIK3R6/PRKCQ/PTK2B/PTN/RHOH/SELP/TESPA1/TNFSF9/ANK3/CD160/COL8A1/ELANE/EMILIN1/GLI3/RAG1/VEGFA/VTCN1	35
GO:0030318	GO:0030318	melanocyte differentiation	7/724	26/18866	4.13529790878246e-05	0.0867841	0.0796598	KIT/MITF/RAB27A/GLI3/OCA2/ENPP1/MREG	7
GO:0050931	GO:0050931	pigment cell differentiation	8/724	36/18866	5.27242265505703e-05	0.0867841	0.0796598	KIT/MITF/RAB27A/RAB38/GLI3/OCA2/ENPP1/MREG	8
GO:0022409	GO:0022409	positive regulation of cell-cell adhesion	25/724	279/18866	7.90588042643518e-05	0.0975981	0.0895861	ADAM8/BAD/BTLA/CAV1/CITED2/DMTN/DPP4/EGR3/IGF1/KIF26B/MYB/NOD2/PDCD1LG2/PIK3R6/PRKCQ/RHOH/SELP/TESPA1/TNFSF9/ANK3/CD160/ELANE/GLI3/RAG1/VTCN1	25
GO:0009101	GO:0009101	glycoprotein biosynthetic process	28/724	342/18866	0.000144859	0.114318	0.104934	ACOT8/AQP11/ASGR1/B3GALNT2/B4GALT4/B4GALT5/DPY19L1/FKRP/GATA1/GCNT4/IGF1/ITM2A/LMAN1/MIR101-1/MOGS/RAMP1/SDF2/SDF2L1/ST3GAL3/ST3GAL4/TRAK2/XYLT2/ACER2/BMPR1B/DSEL/ST6GALNAC2/TET1/DPY19L2	28
GO:0030282	GO:0030282	bone mineralization	14/724	117/18866	0.000157586	0.114318	0.104934	FGFR2/GATA1/IGF1/KLF10/LTF/PTK2B/PTN/SLC24A3/TFAP2A/TGFB1/TMEM119/ZBTB40/BMPR1B/ENPP1	14
GO:0010464	GO:0010464	regulation of mesenchymal cell proliferation	7/724	33/18866	0.000212535	0.114318	0.104934	CHRD/FGFR1/FGFR2/NFIB/PTN/ZEB1/VEGFA	7
GO:0043406	GO:0043406	positive regulation of MAP kinase activity	23/724	264/18866	0.000227686	0.114318	0.104934	ADAM8/CRKL/EDN1/ERN1/FGFR1/GADD45A/IGF1/KIT/MAPK11/NOD2/NTRK1/PDGFC/PIK3R6/PTK2B/S100A12/TDGF1/TGFB1/TPD52L1/ADORA1/ELANE/TENM1/VEGFA/EGF	23
GO:0010463	GO:0010463	mesenchymal cell proliferation	8/724	44/18866	0.000235528	0.114318	0.104934	CHRD/FGFR1/FGFR2/NFIB/PTN/ZEB1/FAT4/VEGFA	8
GO:0030193	GO:0030193	regulation of blood coagulation	11/724	82/18866	0.000288541	0.114318	0.104934	CAV1/DMTN/EDN1/GP1BA/PLG/PRKCQ/PRKG1/SELP/VKORC1/CD34/KRT1	11
GO:1903039	GO:1903039	positive regulation of leukocyte cell-cell adhesion	21/724	235/18866	0.000298317	0.114318	0.104934	ADAM8/BAD/BTLA/CAV1/DPP4/EGR3/IGF1/MYB/NOD2/PDCD1LG2/PIK3R6/PRKCQ/RHOH/SELP/TESPA1/TNFSF9/CD160/ELANE/GLI3/RAG1/VTCN1	21
GO:0051047	GO:0051047	positive regulation of secretion	27/724	340/18866	0.000308473	0.114318	0.104934	ACHE/ADAM8/BAD/CDK5/EDN1/FGFR1/GATA2/GPLD1/HCAR2/HFE/IGF1/INHBA/MYB/OPRL1/P2RY2/PANX1/RAB27A/RAB27B/SYT1/TGFB1/UNC13B/ADORA1/CD34/CLEC4E/FFAR4/NPPB/SYTL4	27
GO:1900046	GO:1900046	regulation of hemostasis	11/724	83/18866	0.0003213	0.114318	0.104934	CAV1/DMTN/EDN1/GP1BA/PLG/PRKCQ/PRKG1/SELP/VKORC1/CD34/KRT1	11
GO:0048066	GO:0048066	developmental pigmentation	8/724	46/18866	0.00032411	0.114318	0.104934	KIT/MITF/RAB27A/RAB38/GLI3/OCA2/ENPP1/MREG	8
GO:0007596	GO:0007596	blood coagulation	27/724	343/18866	0.000354339	0.114839	0.105411	AKAP1/CAV1/CLEC1B/DGKQ/DMTN/EDN1/F5/GATA1/GATA2/GP1BA/HBD/ITGA2B/LMAN1/MPL/PIK3R6/PLG/PRKCH/PRKCQ/PRKG1/RAB27A/SELP/TRPC6/VKORC1/CD34/DOCK6/KRT1/NFE2	27
GO:0007292	GO:0007292	female gamete generation	15/724	142/18866	0.000372098	0.114839	0.105411	DDX20/FOXO3/HORMAD1/IGF1/INHBA/MEIKIN/PANX1/PTK2B/PTN/TRIP13/WDR77/AURKC/BMPR1B/GAS2/HPGD	15
GO:0002576	GO:0002576	platelet degranulation	14/724	129/18866	0.000438406	0.115399	0.105926	DMTN/F5/IGF1/ITGA2B/PLG/QSOX1/RAB27B/SELP/TGFB1/TIMP3/ENDOD1/VEGFA/EGF/SYTL4	14
GO:0007599	GO:0007599	hemostasis	27/724	348/18866	0.000444251	0.115399	0.105926	AKAP1/CAV1/CLEC1B/DGKQ/DMTN/EDN1/F5/GATA1/GATA2/GP1BA/HBD/ITGA2B/LMAN1/MPL/PIK3R6/PLG/PRKCH/PRKCQ/PRKG1/RAB27A/SELP/TRPC6/VKORC1/CD34/DOCK6/KRT1/NFE2	27
GO:0050817	GO:0050817	coagulation	27/724	349/18866	0.00046447	0.115399	0.105926	AKAP1/CAV1/CLEC1B/DGKQ/DMTN/EDN1/F5/GATA1/GATA2/GP1BA/HBD/ITGA2B/LMAN1/MPL/PIK3R6/PLG/PRKCH/PRKCQ/PRKG1/RAB27A/SELP/TRPC6/VKORC1/CD34/DOCK6/KRT1/NFE2	27
GO:0050863	GO:0050863	regulation of T cell activation	26/724	332/18866	0.000488948	0.115399	0.105926	ADAM8/BAD/BTLA/CAV1/CLC/CLPTM1/DLG5/DPP4/EGR3/HFE/IGF1/MYB/NOD2/PDCD1LG2/PIK3R6/PRKCQ/RHOH/SIT1/TCF7/TESPA1/TNFSF9/ZEB1/CD160/GLI3/RAG1/VTCN1	26
GO:0050818	GO:0050818	regulation of coagulation	11/724	88/18866	0.000535857	0.115399	0.105926	CAV1/DMTN/EDN1/GP1BA/PLG/PRKCQ/PRKG1/SELP/VKORC1/CD34/KRT1	11
GO:0050769	GO:0050769	positive regulation of neurogenesis	34/724	485/18866	0.000561623	0.115399	0.105926	ARHGAP35/CRKL/CUX1/DLG4/DLG5/FGFR1/GATA2/KIT/MYB/NRCAM/NTRK1/PLAA/PLXNC1/PPP1R9A/PPP2R5B/PRKCH/PTK2B/PTN/RNF157/SEMA4D/SERPINI1/SKIL/SYT1/TGFB1/TMEM106B/TNFRSF12A/TRPC5/TRPC6/ZEB1/BDNF/GLI3/VEGFA/SHANK3/TENM4	34
GO:0050870	GO:0050870	positive regulation of T cell activation	19/724	214/18866	0.000615294	0.115399	0.105926	ADAM8/BAD/BTLA/CAV1/DPP4/EGR3/IGF1/MYB/NOD2/PDCD1LG2/PIK3R6/PRKCQ/RHOH/TESPA1/TNFSF9/CD160/GLI3/RAG1/VTCN1	19
GO:0018108	GO:0018108	peptidyl-tyrosine phosphorylation	28/724	374/18866	0.000617566	0.115399	0.105926	ANGPT1/CAV1/DGKQ/DLG4/DMTN/EPHA2/FGFR1/FGFR2/GATA1/HCK/IGF1/KIT/NTRK1/PDGFC/PPP2R5B/PTK2B/SEMA4D/SOCS3/TDGF1/TGFB1/WEE1/ADORA1/BDNF/BMX/IL22RA2/STAP1/VEGFA/EGF	28
GO:0001503	GO:0001503	ossification	30/724	412/18866	0.000633244	0.115399	0.105926	ACHE/BMP1/CHRD/COL6A1/EPHA2/FGFR2/GATA1/GPLD1/IGF1/KLF10/LTF/MRC2/PTK2B/PTN/RUNX2/SEMA4D/SLC24A3/SNAI1/TFAP2A/TGFB1/TMEM119/TPH1/ZBTB40/BMPR1B/FAT4/FFAR4/GLI3/MMP16/PBX1/ENPP1	30
GO:0031346	GO:0031346	positive regulation of cell projection organization	29/724	394/18866	0.000653169	0.115399	0.105926	ARHGAP35/CUX1/DLG4/DLG5/FGFR1/KIT/NCKAP1/NTRK1/PLAA/PLXNC1/PPP1R9A/PPP2R5B/PTK2B/PTN/RNF157/SEMA4D/SERPINI1/SKIL/SYT1/TENM2/TMEM106B/TNFRSF12A/TRPC5/BDNF/EPS8L3/TENM1/VEGFA/NAV3/SHANK3	29
GO:0048568	GO:0048568	embryonic organ development	32/724	451/18866	0.000659377	0.115399	0.105926	CITED2/CRB2/CXCL8/E2F7/EDN1/EPHA2/FGFR1/FGFR2/GATA1/GATA2/GJB6/HOXA9/KIT/PBX2/PBX4/PDGFC/PLG/PPP1R13L/RUNX2/SNAI1/SOCS3/TBX6/TCF7/TFAP2A/TGFB1/TPRN/ZEB1/GLI3/HNF1B/MMP16/PBX1/VEGFA	32
GO:0018212	GO:0018212	peptidyl-tyrosine modification	28/724	377/18866	0.000699157	0.115399	0.105926	ANGPT1/CAV1/DGKQ/DLG4/DMTN/EPHA2/FGFR1/FGFR2/GATA1/HCK/IGF1/KIT/NTRK1/PDGFC/PPP2R5B/PTK2B/SEMA4D/SOCS3/TDGF1/TGFB1/WEE1/ADORA1/BDNF/BMX/IL22RA2/STAP1/VEGFA/EGF	28
GO:0048477	GO:0048477	oogenesis	11/724	91/18866	0.00071431	0.115399	0.105926	DDX20/FOXO3/HORMAD1/IGF1/PANX1/PTK2B/PTN/TRIP13/WDR77/AURKC/BMPR1B	11
GO:0043405	GO:0043405	regulation of MAP kinase activity	26/724	342/18866	0.000760821	0.115399	0.105926	ADAM8/CAV1/CRKL/EDN1/ERN1/FGFR1/GADD45A/IGF1/KIT/MAPK11/MBIP/NOD2/NTRK1/PDGFC/PIK3R6/PTK2B/S100A12/TDGF1/TGFB1/TPD52L1/UCHL1/ADORA1/ELANE/TENM1/VEGFA/EGF	26
GO:0072593	GO:0072593	reactive oxygen species metabolic process	23/724	288/18866	0.000775304	0.115399	0.105926	CAV1/CDKN1A/CRYAB/DDIT4/EDN1/EPX/FOXO3/GADD45A/HBD/HP/LPO/NCF1B/NCF1C/PRG3/PTK2B/PXDNL/RAB27A/TFAP2A/TGFB1/TICAM1/CD34/NOS1AP/SLC18A2	23
GO:0019932	GO:0019932	second-messenger-mediated signaling	32/724	456/18866	0.000793229	0.115399	0.105926	ACKR2/ADGRE3/ADGRG1/ADGRG5/ADGRL2/CCRL2/CXCL8/DGKQ/DMTN/EDN1/GRIN2D/IGF1/NFATC1/OPRL1/PPP1R9A/PPP3CC/PRKG1/PTGDR2/PTK2B/RAMP1/RNF157/S1PR3/SELP/SLC8A2/TRAT1/ADGRL3/FFAR4/GUCY1A2/NOS1AP/NPPB/VEGFA/PTGER2	32
GO:0031640	GO:0031640	killing of cells of other organism	9/724	65/18866	0.000801937	0.115399	0.105926	BAD/CAMP/CTSG/DEFA3/DEFA4/LTF/PGLYRP1/S100A12/ELANE	9
GO:0071679	GO:0071679	commissural neuron axon guidance	4/724	12/18866	0.000831982	0.115399	0.105926	NFIB/NCAM1/ROBO3/VEGFA	4
GO:0010976	GO:0010976	positive regulation of neuron projection development	23/724	290/18866	0.000851678	0.115399	0.105926	ARHGAP35/CUX1/DLG4/DLG5/FGFR1/NTRK1/PLAA/PLXNC1/PPP1R9A/PPP2R5B/PTK2B/PTN/RNF157/SEMA4D/SERPINI1/SKIL/SYT1/TMEM106B/TNFRSF12A/TRPC5/BDNF/VEGFA/SHANK3	23
GO:0022407	GO:0022407	regulation of cell-cell adhesion	31/724	439/18866	0.000859812	0.115399	0.105926	ADAM8/BAD/BTLA/CAV1/CITED2/DLG5/DMTN/DPP4/EGR3/HFE/IGF1/KIF26B/MYB/NOD2/PDCD1LG2/PIK3R6/PLG/PRKCQ/PRKG1/RHOH/SELP/TESPA1/TGFB1/TNFSF9/ANK3/CD160/ELANE/GLI3/RAG1/VEGFA/VTCN1	31
GO:0071902	GO:0071902	positive regulation of protein serine/threonine kinase activity	26/724	345/18866	0.000864676	0.115399	0.105926	ADAM8/CKS2/CRKL/EDN1/ERN1/FGFR1/GADD45A/IGF1/KIT/LTF/MAPK11/NOD2/NTRK1/PDGFC/PIK3R6/PTK2B/S100A12/SLC8A2/TDGF1/TGFB1/TPD52L1/ADORA1/ELANE/TENM1/VEGFA/EGF	26
GO:0050867	GO:0050867	positive regulation of cell activation	30/724	421/18866	0.000896196	0.116458	0.106898	ADAM8/BAD/BTLA/CAV1/CD226/CDKN1A/CLEC4D/DMTN/DPP4/EGR3/GATA2/IGF1/IL1RL1/MPL/MYB/NOD2/PDCD1LG2/PIK3R6/PRKCQ/RHOH/SELP/TESPA1/TGFB1/TICAM1/TNFSF9/CD160/GLI3/RAG1/STAP1/VTCN1	30
GO:0001906	GO:0001906	cell killing	16/724	172/18866	0.000983966	0.124585	0.114358	BAD/CAMP/CD1E/CD226/CTSG/DEFA3/DEFA4/DNASE1/LTF/PGLYRP1/PIK3R6/RAB27A/S100A12/CD160/ELANE/STAP1	16
GO:0003018	GO:0003018	vascular process in circulatory system	17/724	190/18866	0.0010708	0.127887	0.117389	ABCB1/AKAP12/ANGPT1/ARHGAP35/CAV1/EDN1/KCNMB1/P2RY2/PER2/PRKG1/PTPRM/TGFB1/UTS2B/ADORA1/NPPB/SLC22A1/VEGFA	17
GO:0098742	GO:0098742	cell-cell adhesion via plasma-membrane adhesion molecules	22/724	277/18866	0.00107331	0.127887	0.117389	ARVCF/CDH23/CEACAM8/CLDN20/CRB2/ESAM/MPZL2/PCDH17/PCDH9/PCDHGA8/PCDHGB5/PTPRM/SELP/TENM2/ADGRL3/FAT4/PCDH10/PCDHA9/ROBO3/TENM1/CDH15/TENM4	22
GO:0010469	GO:0010469	regulation of signaling receptor activity	16/724	174/18866	0.00111274	0.127887	0.117389	AKAP9/CDK5/DLG4/HFE/IL18BP/PCSK9/PPP2R5B/PTK2B/SLC6A9/ADORA1/CNIH3/DKKL1/LYPD1/EGF/MTRNR2L4/SHANK3	16
GO:0048167	GO:0048167	regulation of synaptic plasticity	17/724	191/18866	0.00113459	0.127887	0.117389	CDK5/DLG4/GRIN2D/KIT/MPP2/NRGN/PPP1R9A/PTK2B/PTN/RIMS3/RIN1/SIPA1L1/SLC8A2/UNC13B/ADORA1/BDNF/SHANK3	17
GO:0021954	GO:0021954	central nervous system neuron development	10/724	82/18866	0.00115036	0.127887	0.117389	AGBL4/ARHGAP35/B4GALT5/CDK5/CRKL/FGFR2/GATA2/MAP2/NFIB/DCLK2	10
GO:0007171	GO:0007171	activation of transmembrane receptor protein tyrosine kinase activity	4/724	13/18866	0.00116544	0.127887	0.117389	ANGPT1/DGKQ/PDGFC/EGF	4
GO:0043254	GO:0043254	regulation of protein-containing complex assembly	31/724	449/18866	0.00123502	0.130393	0.119689	AKAP9/BAK1/CRYAB/DMTN/EML2/ESAM/ESR1/HCK/KIF14/LMO4/MAP2/MEFV/NCKAP1/PPP1R9A/PPP2R5B/PTK2B/RASA1/SELP/SLAIN2/TGFB1/TICAM1/TMOD2/UNC13B/WHAMM/GFAP/HRK/MAPK15/TENM1/VEGFA/BIK/NAV3	31
GO:0042698	GO:0042698	ovulation cycle	9/724	69/18866	0.00124109	0.130393	0.119689	ESR1/FOXO3/INHBA/OPRL1/PLEKHA1/PTN/BMPR1B/GAS2/TIMP4	9
GO:0050730	GO:0050730	regulation of peptidyl-tyrosine phosphorylation	21/724	263/18866	0.00129062	0.132773	0.121873	ANGPT1/CAV1/DGKQ/DLG4/DMTN/GATA1/IGF1/KIT/PDGFC/PPP2R5B/PTK2B/SEMA4D/SOCS3/TDGF1/TGFB1/ADORA1/BDNF/IL22RA2/STAP1/VEGFA/EGF	21
GO:0002283	GO:0002283	neutrophil activation involved in immune response	33/724	490/18866	0.00132038	0.133062	0.122139	ADAM8/ADGRE3/BIN2/BPI/CAMP/CDA/CEACAM8/CHIT1/CLEC4D/CRISP3/CTSG/DEFA4/DNASE1/EPX/FCAR/HP/KPNB1/LTF/NIT2/OSCAR/PADI2/PGLYRP1/PRG3/QSOX1/RAB27A/RAB44/S100A12/S100P/ELANE/KRT1/SLCO4C1/QPCT/TCN1	33
GO:0002685	GO:0002685	regulation of leukocyte migration	18/724	212/18866	0.00141107	0.134594	0.123545	ADAM8/CRKL/CXCL8/DAPK2/DPP4/EDN1/GCSAML/ITGA2B/PADI2/PTK2B/PTN/RHOH/SELP/ADORA1/ELANE/EMILIN1/STAP1/VEGFA	18
GO:0030278	GO:0030278	regulation of ossification	18/724	212/18866	0.00141107	0.134594	0.123545	CHRD/FGFR2/GATA1/IGF1/LTF/PTK2B/PTN/RUNX2/SEMA4D/TFAP2A/TGFB1/TMEM119/TPH1/BMPR1B/FFAR4/GLI3/PBX1/ENPP1	18
GO:0001541	GO:0001541	ovarian follicle development	8/724	57/18866	0.00141735	0.134594	0.123545	EIF2B5/ESR1/FOXO3/INHBA/KIT/BMPR1B/GAS2/VEGFA	8
GO:0007411	GO:0007411	axon guidance	22/724	284/18866	0.00147918	0.137815	0.126502	ARHGAP35/CDK5/EPHA2/NFIB/NRCAM/NRXN3/NTRK1/PLXNC1/PRKCQ/PTPRM/RHOH/SEMA4D/SEMA6B/UNC5A/BDNF/BMPR1B/DOK5/GLI3/NCAM1/ROBO3/VEGFA/SHANK3	22
GO:0097485	GO:0097485	neuron projection guidance	22/724	285/18866	0.00154671	0.13811	0.126772	ARHGAP35/CDK5/EPHA2/NFIB/NRCAM/NRXN3/NTRK1/PLXNC1/PRKCQ/PTPRM/RHOH/SEMA4D/SEMA6B/UNC5A/BDNF/BMPR1B/DOK5/GLI3/NCAM1/ROBO3/VEGFA/SHANK3	22
GO:0035162	GO:0035162	embryonic hemopoiesis	5/724	23/18866	0.00155288	0.13811	0.126772	GATA1/GATA2/KIT/PBX1/VEGFA	5
GO:0060707	GO:0060707	trophoblast giant cell differentiation	4/724	14/18866	0.00158237	0.13811	0.126772	E2F7/PLG/SNAI1/SOCS3	4
GO:0045666	GO:0045666	positive regulation of neuron differentiation	27/724	380/18866	0.00165216	0.13811	0.126772	ARHGAP35/CUX1/DLG4/DLG5/FGFR1/GATA2/NRCAM/NTRK1/PLAA/PLXNC1/PPP1R9A/PPP2R5B/PTK2B/PTN/RNF157/SEMA4D/SERPINI1/SKIL/SYT1/TMEM106B/TNFRSF12A/TRPC5/TRPC6/ZEB1/BDNF/VEGFA/SHANK3	27
GO:0022604	GO:0022604	regulation of cell morphogenesis	33/724	499/18866	0.00177518	0.13811	0.126772	ARHGAP35/BAMBI/CDK5/CRKL/CUX1/DLG4/DMTN/HCK/KIT/MAP2/MPL/NRCAM/PLAA/PLXNC1/PPP1R9A/PTK2B/PTN/RASA1/RHOH/RNF157/SEMA4D/SEMA6B/SIPA1L1/SKIL/SYT1/TNFRSF12A/TRAK2/TRPC5/TRPC6/BDNF/GAS2/VEGFA/SHANK3	33
GO:0006486	GO:0006486	protein glycosylation	20/724	252/18866	0.00178874	0.13811	0.126772	AQP11/ASGR1/B3GALNT2/B4GALT4/B4GALT5/DPY19L1/FKRP/GCNT4/LMAN1/MOGS/RAMP1/SDF2/SDF2L1/ST3GAL3/ST3GAL4/TRAK2/ACER2/ST6GALNAC2/TET1/DPY19L2	20
GO:0043413	GO:0043413	macromolecule glycosylation	20/724	252/18866	0.00178874	0.13811	0.126772	AQP11/ASGR1/B3GALNT2/B4GALT4/B4GALT5/DPY19L1/FKRP/GCNT4/LMAN1/MOGS/RAMP1/SDF2/SDF2L1/ST3GAL3/ST3GAL4/TRAK2/ACER2/ST6GALNAC2/TET1/DPY19L2	20
GO:0035268	GO:0035268	protein mannosylation	5/724	24/18866	0.00190029	0.13811	0.126772	DPY19L1/FKRP/SDF2/SDF2L1/DPY19L2	5
GO:1902105	GO:1902105	regulation of leukocyte differentiation	22/724	290/18866	0.00192527	0.13811	0.126772	ADAM8/BAD/CLPTM1/EGR3/GATA2/INHBA/KLF10/LRRC17/LTF/MITF/MYB/PGLYRP1/PIK3R6/RHOH/TCF7/TESPA1/TGFB1/TMEM176A/TNFSF9/ZEB1/GLI3/RAG1	22
GO:0007409	GO:0007409	axonogenesis	32/724	482/18866	0.00194594	0.13811	0.126772	ARHGAP35/B4GALT5/CDK5/EPHA2/FGFR2/MAP2/NFIB/NRCAM/NRXN3/NTRK1/PLXNC1/PRKCQ/PTPRM/RHOH/SEMA4D/SEMA6B/SIPA1L1/SKIL/TNFRSF12A/TRAK2/TRPC5/UCHL1/UNC5A/ANK3/BDNF/BMPR1B/DOK5/GLI3/NCAM1/ROBO3/VEGFA/SHANK3	32
GO:0007498	GO:0007498	mesoderm development	13/724	134/18866	0.00195607	0.13811	0.126772	CHRD/CITED2/CRB2/EPHA2/FGFR1/FGFR2/HCK/INHBA/SNAI1/TBX19/TBX6/BMX/VEGFA	13
GO:0007157	GO:0007157	heterophilic cell-cell adhesion via plasma membrane cell adhesion molecules	7/724	47/18866	0.00196545	0.13811	0.126772	CEACAM8/CRB2/SELP/TENM2/FAT4/TENM1/TENM4	7
GO:0010559	GO:0010559	regulation of glycoprotein biosynthetic process	7/724	47/18866	0.00196545	0.13811	0.126772	ACOT8/GATA1/IGF1/ITM2A/MIR101-1/RAMP1/ACER2	7
GO:1903115	GO:1903115	regulation of actin filament-based movement	7/724	47/18866	0.00196545	0.13811	0.126772	AKAP9/CAV1/PKP2/TNNC1/ADORA1/ATP2A1/NOS1AP	7
GO:0042391	GO:0042391	regulation of membrane potential	30/724	443/18866	0.00197284	0.13811	0.126772	AKAP9/BAD/BAK1/CAV1/CDK5/DLG4/EDN1/GRIN2D/GRIN3A/KCNH2/KCNK13/MPP2/NRCAM/PKP2/PPP1R9A/PTK2B/PTN/PXK/PYCR1/RIMS3/SLC8A2/TRPC5/UNC13B/ADORA1/ANK3/BDNF/CNIH3/NOS1AP/PIP5KL1/SHANK3	30
GO:0048608	GO:0048608	reproductive structure development	30/724	443/18866	0.00197284	0.13811	0.126772	ADGRG1/BAK1/CITED2/CRKL/E2F7/EIF2B5/ESR1/FGFR2/FOXO3/GATA1/GATA2/HOXA9/INHBA/KIT/NTRK1/PLEKHA1/PLG/PTN/RAB13/SNAI1/SOCS3/TCF7/WDR77/BMPR1B/ETNK2/GAS2/GLI3/VEGFA/BIK/TEX19	30
GO:0048732	GO:0048732	gland development	30/724	443/18866	0.00197284	0.13811	0.126772	ARHGAP35/CAV1/CITED2/CRKL/E2F7/EPHA2/ESR1/FGFR1/FGFR2/GATA2/HFE/HOXA9/LMO4/NFIB/PCSK9/PNPT1/PTN/TBX19/TDGF1/TGFB1/TGFBR3/TNFAIP3/TPH1/WDR77/GLI3/HNF1B/PBX1/RAG1/VEGFA/EGF	30
GO:0042110	GO:0042110	T cell activation	32/724	483/18866	0.00201019	0.13811	0.126772	ADAM8/BAD/BTLA/CAV1/CLC/CLEC4D/CLPTM1/CTPS1/DLG5/DPP4/EGR3/HFE/IGF1/KIT/MYB/NOD2/PDCD1LG2/PIK3R6/PRKCQ/RAB27A/RHOH/RUNX2/SIT1/TCF7/TESPA1/TNFSF9/ZEB1/CD160/CLEC4E/GLI3/RAG1/VTCN1	32
GO:0018105	GO:0018105	peptidyl-serine phosphorylation	23/724	310/18866	0.00204916	0.13811	0.126772	AKAP9/ANGPT1/BAK1/CAV1/CDK5/DDIT4/DGKQ/DMTN/ERN1/GADD45A/MAST2/PRKCH/PRKCQ/SMYD3/TDGF1/TGFB1/TLK1/AURKC/BDNF/DCLK2/TENM1/VEGFA/PLCL1	23
GO:0061041	GO:0061041	regulation of wound healing	14/724	151/18866	0.00205334	0.13811	0.126772	CAV1/DMTN/EDN1/GP1BA/PLG/PRKCQ/PRKG1/SELP/TNFAIP3/TNFRSF12A/VKORC1/CD34/KRT1/SYTL4	14
GO:0002696	GO:0002696	positive regulation of leukocyte activation	28/724	406/18866	0.00211471	0.13811	0.126772	ADAM8/BAD/BTLA/CAV1/CD226/CDKN1A/CLEC4D/DPP4/EGR3/GATA2/IGF1/IL1RL1/MPL/MYB/NOD2/PDCD1LG2/PIK3R6/PRKCQ/RHOH/TESPA1/TGFB1/TICAM1/TNFSF9/CD160/GLI3/RAG1/STAP1/VTCN1	28
GO:0010799	GO:0010799	regulation of peptidyl-threonine phosphorylation	7/724	48/18866	0.00222621	0.13811	0.126772	DDIT4/DGKQ/DMTN/TGFB1/TRPC5/TRPC6/EGF	7
GO:0001707	GO:0001707	mesoderm formation	9/724	75/18866	0.00224441	0.13811	0.126772	CHRD/CRB2/EPHA2/FGFR1/FGFR2/INHBA/SNAI1/TBX19/TBX6	9
GO:0061458	GO:0061458	reproductive system development	30/724	447/18866	0.00225765	0.13811	0.126772	ADGRG1/BAK1/CITED2/CRKL/E2F7/EIF2B5/ESR1/FGFR2/FOXO3/GATA1/GATA2/HOXA9/INHBA/KIT/NTRK1/PLEKHA1/PLG/PTN/RAB13/SNAI1/SOCS3/TCF7/WDR77/BMPR1B/ETNK2/GAS2/GLI3/VEGFA/BIK/TEX19	30
GO:0043312	GO:0043312	neutrophil degranulation	32/724	487/18866	0.00228584	0.13811	0.126772	ADAM8/ADGRE3/BIN2/BPI/CAMP/CDA/CEACAM8/CHIT1/CLEC4D/CRISP3/CTSG/DEFA4/EPX/FCAR/HP/KPNB1/LTF/NIT2/OSCAR/PADI2/PGLYRP1/PRG3/QSOX1/RAB27A/RAB44/S100A12/S100P/ELANE/KRT1/SLCO4C1/QPCT/TCN1	32
GO:0050857	GO:0050857	positive regulation of antigen receptor-mediated signaling pathway	5/724	25/18866	0.00230126	0.13811	0.126772	CD226/PRKCH/TESPA1/TRAT1/STAP1	5
GO:0060348	GO:0060348	bone development	17/724	204/18866	0.00230422	0.13811	0.126772	FGFR2/IGF1/KIT/LRRC17/LTF/PDGFC/RUNX2/SEMA4D/SLC10A7/TFAP2A/TMEM119/VKORC1/BMPR1B/FAT4/FREM1/GLI3/MMP16	17
GO:1903708	GO:1903708	positive regulation of hemopoiesis	17/724	204/18866	0.00230422	0.13811	0.126772	ADAM8/BAD/EGR3/FOXO3/GATA1/GATA2/INHBA/KLF10/MPL/MYB/PIK3R6/RHOH/TESPA1/TGFB1/TNFSF9/GLI3/RAG1	17
GO:1903532	GO:1903532	positive regulation of secretion by cell	23/724	313/18866	0.00231643	0.13811	0.126772	ACHE/ADAM8/BAD/CDK5/EDN1/FGFR1/GATA2/GPLD1/HCAR2/HFE/IGF1/INHBA/MYB/PANX1/RAB27A/RAB27B/SYT1/TGFB1/UNC13B/CD34/CLEC4E/FFAR4/SYTL4	23
GO:0031532	GO:0031532	actin cytoskeleton reorganization	11/724	105/18866	0.00232141	0.13811	0.126772	CDC42BPG/CDK5/DMTN/ESAM/HCK/KIT/PTK2B/SIPA1L1/THSD7A/WHAMM/STAP1	11
GO:0008406	GO:0008406	gonad development	18/724	223/18866	0.00246778	0.14507	0.133161	ADGRG1/CITED2/CRKL/EIF2B5/ESR1/FOXO3/GATA1/HOXA9/INHBA/KIT/NTRK1/PLEKHA1/RAB13/BMPR1B/GAS2/VEGFA/BIK/TEX19	18
GO:0006493	GO:0006493	protein O-linked glycosylation	11/724	106/18866	0.00250271	0.145393	0.133457	B3GALNT2/B4GALT5/FKRP/GCNT4/SDF2/SDF2L1/ST3GAL3/ST3GAL4/TRAK2/ST6GALNAC2/TET1	11
GO:0050806	GO:0050806	positive regulation of synaptic transmission	15/724	172/18866	0.00263744	0.149918	0.137611	CDK5/DLG4/GRIN2D/MPP2/NRGN/NTRK1/PPP1R9A/PTK2B/PTN/RIMS3/SLC8A2/SYT1/UNC13B/ADORA1/SHANK3	15
GO:0030500	GO:0030500	regulation of bone mineralization	9/724	77/18866	0.00269428	0.149918	0.137611	GATA1/LTF/PTK2B/PTN/TFAP2A/TGFB1/TMEM119/BMPR1B/ENPP1	9
GO:0048332	GO:0048332	mesoderm morphogenesis	9/724	77/18866	0.00269428	0.149918	0.137611	CHRD/CRB2/EPHA2/FGFR1/FGFR2/INHBA/SNAI1/TBX19/TBX6	9
GO:0043116	GO:0043116	negative regulation of vascular permeability	4/724	16/18866	0.00270635	0.149918	0.137611	AKAP12/ANGPT1/ARHGAP35/VEGFA	4
GO:0045582	GO:0045582	positive regulation of T cell differentiation	10/724	92/18866	0.00275523	0.149918	0.137611	ADAM8/BAD/EGR3/MYB/PIK3R6/RHOH/TESPA1/TNFSF9/GLI3/RAG1	10
GO:0007548	GO:0007548	sex differentiation	21/724	280/18866	0.00276277	0.149918	0.137611	ADGRG1/BAK1/CITED2/CRKL/EIF2B5/ESR1/FOXO3/GATA1/HOXA9/INHBA/KIT/NTRK1/PLEKHA1/RAB13/TCF7/BMPR1B/GAS2/PBX1/VEGFA/BIK/TEX19	21
GO:0050804	GO:0050804	modulation of chemical synaptic transmission	30/724	454/18866	0.00284131	0.152504	0.139985	ACHE/AKAP12/AKAP9/CDK5/DLG4/EDN1/GRIN2D/GRIN3A/KIT/MPP2/NRGN/NTRK1/PCDH17/PLEKHG5/PLG/PPP1R9A/PREPL/PTK2B/PTN/PXK/RIMS3/RIN1/SIPA1L1/SLC8A2/SYT1/UNC13B/ADORA1/BDNF/PLCL1/SHANK3	30
GO:0009100	GO:0009100	glycoprotein metabolic process	28/724	415/18866	0.00288832	0.153361	0.140771	ACOT8/AQP11/ASGR1/B3GALNT2/B4GALT4/B4GALT5/DPY19L1/FKRP/GATA1/GCNT4/IGF1/ITM2A/LMAN1/MIR101-1/MOGS/RAMP1/SDF2/SDF2L1/ST3GAL3/ST3GAL4/TRAK2/XYLT2/ACER2/BMPR1B/DSEL/ST6GALNAC2/TET1/DPY19L2	28
GO:0099177	GO:0099177	regulation of trans-synaptic signaling	30/724	455/18866	0.00293439	0.154149	0.141495	ACHE/AKAP12/AKAP9/CDK5/DLG4/EDN1/GRIN2D/GRIN3A/KIT/MPP2/NRGN/NTRK1/PCDH17/PLEKHG5/PLG/PPP1R9A/PREPL/PTK2B/PTN/PXK/RIMS3/RIN1/SIPA1L1/SLC8A2/SYT1/UNC13B/ADORA1/BDNF/PLCL1/SHANK3	30
GO:0021953	GO:0021953	central nervous system neuron differentiation	16/724	192/18866	0.00305599	0.157359	0.144442	AGBL4/ARHGAP35/B4GALT5/CDK5/CRKL/DYNC2H1/FGFR2/GATA2/INHBA/LMO4/MAP2/NFIB/SPOCK1/DCLK2/GLI3/SHANK3	16
GO:0008584	GO:0008584	male gonad development	13/724	141/18866	0.00306634	0.157359	0.144442	ADGRG1/CITED2/CRKL/ESR1/GATA1/HOXA9/INHBA/KIT/NTRK1/PLEKHA1/RAB13/BIK/TEX19	13
GO:0031589	GO:0031589	cell-substrate adhesion	25/724	359/18866	0.00314249	0.157359	0.144442	ANGPT1/CDK5/CRKL/DMTN/EDIL3/ITGA2B/ITGB7/ITGBL1/KIF14/OTOA/PLG/PTK2B/PTN/RASA1/SPOCK1/TMEM8B/TNFRSF12A/WHAMM/ACER2/CD34/COL8A1/EMILIN1/FREM1/SGCE/VEGFA	25
GO:0070085	GO:0070085	glycosylation	20/724	265/18866	0.00320544	0.157359	0.144442	AQP11/ASGR1/B3GALNT2/B4GALT4/B4GALT5/DPY19L1/FKRP/GCNT4/LMAN1/MOGS/RAMP1/SDF2/SDF2L1/ST3GAL3/ST3GAL4/TRAK2/ACER2/ST6GALNAC2/TET1/DPY19L2	20
GO:1903706	GO:1903706	regulation of hemopoiesis	32/724	498/18866	0.00321732	0.157359	0.144442	ADAM8/BAD/CLPTM1/EGR3/FOXO3/GATA1/GATA2/GP1BA/HOXA9/INHBA/ITGA2B/KLF10/LRRC17/LTF/MITF/MPL/MYB/PGLYRP1/PIK3R6/PRKCQ/PTK2B/PTN/RHOH/TCF7/TESPA1/TGFB1/TMEM176A/TNFSF9/ZEB1/GLI3/NFE2/RAG1	32
GO:0045778	GO:0045778	positive regulation of ossification	10/724	94/18866	0.00322707	0.157359	0.144442	IGF1/LTF/PTN/RUNX2/TFAP2A/TGFB1/TMEM119/BMPR1B/FFAR4/GLI3	10
GO:0046546	GO:0046546	development of primary male sexual characteristics	13/724	142/18866	0.00326023	0.157359	0.144442	ADGRG1/CITED2/CRKL/ESR1/GATA1/HOXA9/INHBA/KIT/NTRK1/PLEKHA1/RAB13/BIK/TEX19	13
GO:0045137	GO:0045137	development of primary sexual characteristics	18/724	229/18866	0.00328124	0.157359	0.144442	ADGRG1/CITED2/CRKL/EIF2B5/ESR1/FOXO3/GATA1/HOXA9/INHBA/KIT/NTRK1/PLEKHA1/RAB13/BMPR1B/GAS2/VEGFA/BIK/TEX19	18
GO:0033081	GO:0033081	regulation of T cell differentiation in thymus	5/724	27/18866	0.0032823	0.157359	0.144442	ADAM8/CLPTM1/EGR3/TESPA1/ZEB1	5
GO:0001558	GO:0001558	regulation of cell growth	28/724	420/18866	0.00341392	0.161435	0.148183	CDA/CDK5/CDKN1A/CRKL/CRYAB/EDN1/IGF1/INHBA/KIF14/MAP2/NRCAM/PLAA/PRKCQ/PTK2B/RBBP7/RNF157/SEMA4D/SEMA6B/SPOCK1/SUPV3L1/SYT1/TGFB1/TNFRSF12A/TRPC5/BDNF/NPPB/VEGFA/ENPP1	28
GO:0070242	GO:0070242	thymocyte apoptotic process	4/724	17/18866	0.00343271	0.161435	0.148183	ADAM8/BAK1/GLI3/RAG1	4
GO:0043542	GO:0043542	endothelial cell migration	21/724	286/18866	0.00354215	0.163155	0.149761	ANGPT1/DPP4/EDN1/EGR3/EPHA2/FGFR1/GADD45A/GATA2/GPLD1/LGALS12/MIR101-1/PLEKHG5/PTK2B/PTN/PTPRM/RAB13/S100P/TDGF1/TGFB1/CARD10/VEGFA	21
GO:0050731	GO:0050731	positive regulation of peptidyl-tyrosine phosphorylation	16/724	195/18866	0.00356093	0.163155	0.149761	ANGPT1/DGKQ/DLG4/GATA1/IGF1/KIT/PTK2B/SEMA4D/SOCS3/TDGF1/TGFB1/ADORA1/BDNF/STAP1/VEGFA/EGF	16
GO:0001704	GO:0001704	formation of primary germ layer	12/724	127/18866	0.00356839	0.163155	0.149761	CHRD/COL6A1/CRB2/EPHA2/FGFR1/FGFR2/INHBA/SNAI1/TBX19/TBX6/COL8A1/HNF1B	12
GO:0021700	GO:0021700	developmental maturation	21/724	287/18866	0.0036884	0.167095	0.153378	B4GALT5/CDKN1A/DLG4/FGFR1/FOXO3/GATA2/GLDN/IGF1/KIF14/LTF/NRCAM/PTK2B/RAB38/RUNX2/SEMA4D/TBX6/TRIP13/UNC13B/WDR77/FAT4/VEGFA	21
GO:0007159	GO:0007159	leukocyte cell-cell adhesion	25/724	364/18866	0.0037585	0.168722	0.154872	ADAM8/BAD/BTLA/CAV1/DLG5/DPP4/EGR3/HFE/IGF1/ITGB7/MYB/NOD2/PDCD1LG2/PIK3R6/PRKCQ/RHOH/SELP/SEMA4D/TESPA1/TNFSF9/CD160/ELANE/GLI3/RAG1/VTCN1	25
GO:0050829	GO:0050829	defense response to Gram-negative bacterium	9/724	81/18866	0.00380654	0.16904	0.155163	BPI/CAMP/CTSG/DEFA3/DEFA4/LTF/SELP/CD160/ELANE	9
GO:0099565	GO:0099565	chemical synaptic transmission, postsynaptic	11/724	112/18866	0.00384528	0.16904	0.155163	CDK5/DLG4/GRIN2D/MPP2/PPP1R9A/PTK2B/SLC8A2/UNC13B/ADORA1/BDNF/SHANK3	11
GO:0090200	GO:0090200	positive regulation of release of cytochrome c from mitochondria	5/724	28/18866	0.00387159	0.16904	0.155163	BAD/BAK1/MOAP1/HRK/BIK	5
GO:0033135	GO:0033135	regulation of peptidyl-serine phosphorylation	13/724	145/18866	0.00390249	0.16904	0.155163	AKAP9/ANGPT1/BAK1/CAV1/DDIT4/DMTN/GADD45A/SMYD3/TGFB1/BDNF/TENM1/VEGFA/PLCL1	13
GO:0030501	GO:0030501	positive regulation of bone mineralization	6/724	40/18866	0.00394242	0.169284	0.155387	LTF/PTN/TFAP2A/TGFB1/TMEM119/BMPR1B	6
GO:0031214	GO:0031214	biomineral tissue development	14/724	163/18866	0.0041319	0.170522	0.156524	FGFR2/GATA1/IGF1/KLF10/LTF/PTK2B/PTN/SLC24A3/TFAP2A/TGFB1/TMEM119/ZBTB40/BMPR1B/ENPP1	14
GO:0110148	GO:0110148	biomineralization	14/724	163/18866	0.0041319	0.170522	0.156524	FGFR2/GATA1/IGF1/KLF10/LTF/PTK2B/PTN/SLC24A3/TFAP2A/TGFB1/TMEM119/ZBTB40/BMPR1B/ENPP1	14
GO:0048813	GO:0048813	dendrite morphogenesis	13/724	146/18866	0.00413801	0.170522	0.156524	CDK5/CUX1/DLG4/MAP2/PPP1R9A/PTN/SEMA4D/SIPA1L1/TMEM106B/TRAK2/TRPC5/TRPC6/SHANK3	13
GO:0045619	GO:0045619	regulation of lymphocyte differentiation	15/724	181/18866	0.00427228	0.170522	0.156524	ADAM8/BAD/CLPTM1/EGR3/INHBA/MYB/PGLYRP1/PIK3R6/RHOH/TCF7/TESPA1/TNFSF9/ZEB1/GLI3/RAG1	15
GO:0048557	GO:0048557	embryonic digestive tract morphogenesis	4/724	18/18866	0.00428103	0.170522	0.156524	FGFR2/TCF7/GLI3/HNF1B	4
GO:1903037	GO:1903037	regulation of leukocyte cell-cell adhesion	23/724	329/18866	0.00429415	0.170522	0.156524	ADAM8/BAD/BTLA/CAV1/DLG5/DPP4/EGR3/HFE/IGF1/MYB/NOD2/PDCD1LG2/PIK3R6/PRKCQ/RHOH/SELP/TESPA1/TNFSF9/CD160/ELANE/GLI3/RAG1/VTCN1	23
GO:0071695	GO:0071695	anatomical structure maturation	18/724	235/18866	0.00430601	0.170522	0.156524	B4GALT5/CDKN1A/FGFR1/FOXO3/GATA2/GLDN/IGF1/KIF14/LTF/NRCAM/PTK2B/RUNX2/SEMA4D/TBX6/TRIP13/WDR77/FAT4/VEGFA	18
GO:0001764	GO:0001764	neuron migration	14/724	164/18866	0.00436301	0.170522	0.156524	ACAP3/ADGRG1/CDK5/CRKL/DDIT4/FGFR1/GATA2/NRCAM/PLAA/PRKG1/SPOCK1/ADGRL3/SCRT2/VEGFA	14
GO:0009620	GO:0009620	response to fungus	7/724	54/18866	0.00439366	0.170522	0.156524	BAK1/CTSG/DEFA3/DEFA4/LTF/S100A12/ELANE	7
GO:1903018	GO:1903018	regulation of glycoprotein metabolic process	7/724	54/18866	0.00439366	0.170522	0.156524	ACOT8/GATA1/IGF1/ITM2A/MIR101-1/RAMP1/ACER2	7
GO:0001655	GO:0001655	urogenital system development	23/724	330/18866	0.00445431	0.170522	0.156524	ANGPT1/AQP11/CRKL/DLG5/ENPEP/ESR1/FGFR1/FGFR2/GATA2/GCNT4/KIF26B/PCSK9/TFAP2A/WDR77/BDNF/CD34/COL4A4/FAT4/GLI3/HNF1B/HPGD/PBX1/VEGFA	23
GO:0038083	GO:0038083	peptidyl-tyrosine autophosphorylation	6/724	41/18866	0.00447134	0.170522	0.156524	CAV1/HCK/NTRK1/PTK2B/BMX/VEGFA	6
GO:0050832	GO:0050832	defense response to fungus	6/724	41/18866	0.00447134	0.170522	0.156524	CTSG/DEFA3/DEFA4/LTF/S100A12/ELANE	6
GO:0002718	GO:0002718	regulation of cytokine production involved in immune response	9/724	83/18866	0.00448308	0.170522	0.156524	CD226/CLC/CLNK/HFE/NOD2/TGFB1/TICAM1/TRIL/CD160	9
GO:0060326	GO:0060326	cell chemotaxis	22/724	311/18866	0.00448924	0.170522	0.156524	ACKR2/ADAM8/BIN2/CCRL2/CRKL/CXCL8/DAPK2/DPP4/EDN1/EGR3/EPHA2/FGFR1/KIT/PADI2/PLEKHG5/PRKCQ/PTK2B/PTN/RAB13/S100A12/STAP1/VEGFA	22
GO:0006766	GO:0006766	vitamin metabolic process	12/724	131/18866	0.00458691	0.172902	0.158708	ALDH1L2/FGFR1/LMBRD1/SLC2A1/SNAI1/VKORC1/VNN2/VNN3/CYP27A1/GSTO2/ENPP1/TCN1	12
GO:1903034	GO:1903034	regulation of response to wounding	15/724	183/18866	0.0047295	0.17692	0.162396	CAV1/DMTN/EDN1/GP1BA/PLG/PRKCQ/PRKG1/PTN/SELP/TNFAIP3/TNFRSF12A/VKORC1/CD34/KRT1/SYTL4	15
GO:0048872	GO:0048872	homeostasis of number of cells	19/724	256/18866	0.00479779	0.17692	0.162396	BAK1/DMTN/FOXO3/GATA1/GATA2/GCNT4/GPR174/HCAR2/INHBA/KIT/MFHAS1/MPL/SFXN1/SIT1/SKIL/TGFBR3/TNFAIP3/RAG1/VEGFA	19
GO:0050854	GO:0050854	regulation of antigen receptor-mediated signaling pathway	8/724	69/18866	0.00480098	0.17692	0.162396	CD19/CD226/GCSAML/PRKCH/TESPA1/TRAT1/CD160/STAP1	8
GO:0018209	GO:0018209	peptidyl-serine modification	23/724	333/18866	0.00496494	0.178068	0.16345	AKAP9/ANGPT1/BAK1/CAV1/CDK5/DDIT4/DGKQ/DMTN/ERN1/GADD45A/MAST2/PRKCH/PRKCQ/SMYD3/TDGF1/TGFB1/TLK1/AURKC/BDNF/DCLK2/TENM1/VEGFA/PLCL1	23
GO:1902622	GO:1902622	regulation of neutrophil migration	6/724	42/18866	0.00505074	0.178068	0.16345	ADAM8/CXCL8/DAPK2/DPP4/EDN1/RHOH	6
GO:0032496	GO:0032496	response to lipopolysaccharide	23/724	334/18866	0.0051456	0.178068	0.16345	AKAP12/BPI/CTSG/CXCL8/DEFA3/DEFA4/EDN1/FGFR2/GJB6/HCK/LTF/NOD2/PDCD1LG2/PLAA/SELP/TGFB1/TICAM1/TNFAIP3/ELANE/HPGD/STAP1/TIMP4/PTGER2	23
GO:0035107	GO:0035107	appendage morphogenesis	13/724	150/18866	0.00519743	0.178068	0.16345	B9D1/BAK1/DYNC2H1/FGFR1/FGFR2/HOXA9/PBX2/RUNX2/TFAP2A/TMEM107/BMPR1B/GLI3/PBX1	13
GO:0035108	GO:0035108	limb morphogenesis	13/724	150/18866	0.00519743	0.178068	0.16345	B9D1/BAK1/DYNC2H1/FGFR1/FGFR2/HOXA9/PBX2/RUNX2/TFAP2A/TMEM107/BMPR1B/GLI3/PBX1	13
GO:0045580	GO:0045580	regulation of T cell differentiation	13/724	150/18866	0.00519743	0.178068	0.16345	ADAM8/BAD/CLPTM1/EGR3/MYB/PIK3R6/RHOH/TCF7/TESPA1/TNFSF9/ZEB1/GLI3/RAG1	13
GO:0010561	GO:0010561	negative regulation of glycoprotein biosynthetic process	4/724	19/18866	0.00526012	0.178068	0.16345	ACOT8/ITM2A/MIR101-1/ACER2	4
GO:0060749	GO:0060749	mammary gland alveolus development	4/724	19/18866	0.00526012	0.178068	0.16345	ESR1/TPH1/VEGFA/EGF	4
GO:0061377	GO:0061377	mammary gland lobule development	4/724	19/18866	0.00526012	0.178068	0.16345	ESR1/TPH1/VEGFA/EGF	4
GO:0071625	GO:0071625	vocalization behavior	4/724	19/18866	0.00526012	0.178068	0.16345	DLG4/NRXN3/GLI3/SHANK3	4
GO:0033137	GO:0033137	negative regulation of peptidyl-serine phosphorylation	5/724	30/18866	0.00527065	0.178068	0.16345	BAK1/CAV1/DDIT4/DMTN/GADD45A	5
GO:0034329	GO:0034329	cell junction assembly	28/724	434/18866	0.00533456	0.178068	0.16345	ACHE/ARVCF/CAV1/CDK5/CLDN20/CRKL/DLG5/DMTN/EPHA2/ESAM/GJB6/MARVELD2/NRCAM/NTRK1/PCDH17/PKP2/PLEC/PPP1R9A/PRKCH/PTK2B/RAB13/SEMA4D/SNAI1/WHAMM/ADGRL3/BDNF/VEGFA/SHANK3	28
GO:0003002	GO:0003002	regionalization	24/724	355/18866	0.0054197	0.178068	0.16345	ADGRG1/CHRD/CITED2/CRB2/CRKL/DISP1/DPCD/DYNC2H1/EDN1/FGFR1/FGFR2/HES6/HOXA9/PBX2/SNAI1/TBX19/TBX6/TDGF1/TMEM107/WDR77/BMPR1B/GLI3/HNF1B/PBX1	24
GO:0010749	GO:0010749	regulation of nitric oxide mediated signal transduction	3/724	10/18866	0.00551728	0.178068	0.16345	GUCY1A2/NOS1AP/VEGFA	3
GO:0030202	GO:0030202	heparin metabolic process	3/724	10/18866	0.00551728	0.178068	0.16345	ANGPT1/SLC10A7/XYLT2	3
GO:0034350	GO:0034350	regulation of glial cell apoptotic process	3/724	10/18866	0.00551728	0.178068	0.16345	AKAP12/CDK5/PRKCH	3
GO:0070341	GO:0070341	fat cell proliferation	3/724	10/18866	0.00551728	0.178068	0.16345	FTO/GATA2/PER2	3
GO:0070344	GO:0070344	regulation of fat cell proliferation	3/724	10/18866	0.00551728	0.178068	0.16345	FTO/GATA2/PER2	3
GO:0070942	GO:0070942	neutrophil mediated cytotoxicity	3/724	10/18866	0.00551728	0.178068	0.16345	CTSG/DNASE1/ELANE	3
GO:0006874	GO:0006874	cellular calcium ion homeostasis	29/724	456/18866	0.00563421	0.1799	0.165132	ACKR2/BAK1/CAV1/CCRL2/CD19/CDH23/CDK5/DLG4/EDN1/ESR1/GATA2/GPR174/GRIN2D/OPRL1/PTK2B/S1PR3/SLC10A7/SLC24A3/SLC8A2/TRPC5/TRPC6/ADORA1/ATP2A1/ELANE/FFAR4/MCOLN3/SLC24A4/PTGER2/RYR3	29
GO:0034109	GO:0034109	homotypic cell-cell adhesion	9/724	86/18866	0.00566926	0.1799	0.165132	DMTN/GATA1/GP1BA/ITGA2B/MPL/PKP2/PRKCQ/PRKG1/ANK3	9
GO:0086004	GO:0086004	regulation of cardiac muscle cell contraction	6/724	43/18866	0.00568335	0.1799	0.165132	AKAP9/CAV1/PKP2/ADORA1/ATP2A1/NOS1AP	6
GO:0051480	GO:0051480	regulation of cytosolic calcium ion concentration	24/724	357/18866	0.00580158	0.182473	0.167493	ACKR2/BAK1/CAV1/CCRL2/CD19/CDH23/CDK5/DLG4/EDN1/ESR1/GATA2/GPR174/GRIN2D/OPRL1/PTK2B/S1PR3/SLC8A2/TRPC5/TRPC6/ADORA1/FFAR4/MCOLN3/PTGER2/RYR3	24
GO:0051781	GO:0051781	positive regulation of cell division	9/724	87/18866	0.00611419	0.189886	0.174298	FGFR2/KIF14/MACC1/MAP10/PDGFC/PTN/TGFB1/AURKC/VEGFA	9
GO:0060291	GO:0060291	long-term synaptic potentiation	9/724	87/18866	0.00611419	0.189886	0.174298	GRIN2D/MPP2/NRGN/PPP1R9A/PTK2B/PTN/SLC8A2/ADORA1/SHANK3	9
GO:0031290	GO:0031290	retinal ganglion cell axon guidance	4/724	20/18866	0.00637837	0.194569	0.178596	NRCAM/PTPRM/BMPR1B/VEGFA	4
GO:0043931	GO:0043931	ossification involved in bone maturation	4/724	20/18866	0.00637837	0.194569	0.178596	IGF1/LTF/SEMA4D/FAT4	4
GO:0002262	GO:0002262	myeloid cell homeostasis	13/724	154/18866	0.00646391	0.194569	0.178596	BAK1/DMTN/FOXO3/GATA1/GATA2/HCAR2/INHBA/KIT/MFHAS1/MPL/SFXN1/TGFBR3/VEGFA	13
GO:0014065	GO:0014065	phosphatidylinositol 3-kinase signaling	13/724	154/18866	0.00646391	0.194569	0.178596	ANGPT1/EDN1/FGFR1/IGF1/KIT/NTRK1/PDGFC/PIP5K1B/PLEKHA1/PPP2R5B/SELP/SEMA4D/CD160	13
GO:0061351	GO:0061351	neural precursor cell proliferation	13/724	154/18866	0.00646391	0.194569	0.178596	ADGRG1/FGFR1/FGFR2/FOXO3/GATA2/KIF14/PTN/SLC16A2/ZNF503/BDNF/GLI3/VEGFA/EGF	13
GO:0043551	GO:0043551	regulation of phosphatidylinositol 3-kinase activity	7/724	58/18866	0.00654079	0.194569	0.178596	CD19/KIT/NOD2/PIK3R6/PTK2B/SOCS3/TGFB1	7
GO:2000272	GO:2000272	negative regulation of signaling receptor activity	7/724	58/18866	0.00654079	0.194569	0.178596	HFE/IL18BP/PCSK9/SLC6A9/DKKL1/LYPD1/MTRNR2L4	7
GO:0002367	GO:0002367	cytokine production involved in immune response	10/724	104/18866	0.00663152	0.196086	0.179989	CD226/CLC/CLNK/HFE/KIT/NOD2/TGFB1/TICAM1/TRIL/CD160	10
GO:0007204	GO:0007204	positive regulation of cytosolic calcium ion concentration	22/724	322/18866	0.00669982	0.196927	0.180761	ACKR2/BAK1/CAV1/CCRL2/CD19/CDK5/DLG4/EDN1/ESR1/GATA2/GPR174/GRIN2D/OPRL1/PTK2B/S1PR3/SLC8A2/TRPC5/TRPC6/FFAR4/MCOLN3/PTGER2/RYR3	22
GO:0051051	GO:0051051	negative regulation of transport	30/724	483/18866	0.00682017	0.198917	0.182588	ANGPT1/CAV1/CDK5/CRYAB/DLG4/DMTN/EDN1/INHBA/KCNH2/LMAN1/MIDN/OPRL1/PCSK9/PPP1R9A/PTK2B/PXK/SLC6A9/SPX/TRAT1/WDR54/WNK2/YRDC/ADORA1/ANK3/FFAR4/PKIA/EGF/ENPP1/GEM/SYTL4	30
GO:0035767	GO:0035767	endothelial cell chemotaxis	5/724	32/18866	0.00699366	0.198917	0.182588	EGR3/FGFR1/PLEKHG5/RAB13/VEGFA	5
GO:0042744	GO:0042744	hydrogen peroxide catabolic process	5/724	32/18866	0.00699366	0.198917	0.182588	EPX/HBD/HP/LPO/PXDNL	5
GO:0010721	GO:0010721	negative regulation of cell development	23/724	343/18866	0.00703053	0.198917	0.182588	ADGRG1/CDK5/DAAM2/DMTN/FOXO3/IGF1/LTF/MAP2/PMP22/PTN/S1PR3/SEMA4D/SEMA6B/SPOCK1/TBX6/TRAK2/TRPC5/TRPC6/BDNF/GLI3/PBX1/STAP1/VEGFA	23
GO:0045621	GO:0045621	positive regulation of lymphocyte differentiation	10/724	105/18866	0.00708521	0.198917	0.182588	ADAM8/BAD/EGR3/MYB/PIK3R6/RHOH/TESPA1/TNFSF9/GLI3/RAG1	10
GO:0043114	GO:0043114	regulation of vascular permeability	6/724	45/18866	0.00711909	0.198917	0.182588	AKAP12/ANGPT1/ARHGAP35/TGFB1/NPPB/VEGFA	6
GO:0016358	GO:0016358	dendrite development	18/724	247/18866	0.00714943	0.198917	0.182588	CDK5/CRKL/CUX1/DLG4/DLG5/GRIN3A/MAP2/PPP1R9A/PRKG1/PTN/SEMA4D/SIPA1L1/TMEM106B/TRAK2/TRPC5/TRPC6/BDNF/SHANK3	18
GO:0032387	GO:0032387	negative regulation of intracellular transport	7/724	59/18866	0.00718185	0.198917	0.182588	ANGPT1/CDK5/CRYAB/DMTN/LMAN1/PCSK9/PKIA	7
GO:0008360	GO:0008360	regulation of cell shape	13/724	156/18866	0.00718313	0.198917	0.182588	ARHGAP35/BAMBI/DMTN/HCK/KIT/PLXNC1/PTK2B/PTN/RASA1/RHOH/SEMA4D/GAS2/VEGFA	13
GO:0048015	GO:0048015	phosphatidylinositol-mediated signaling	15/724	192/18866	0.00730376	0.198917	0.182588	ANGPT1/EDN1/FGFR1/IGF1/KIT/NTRK1/PDGFC/PIP5K1B/PLEKHA1/PPP2R5B/SELP/SEMA4D/CD160/PITPNM2/PLCL1	15
GO:0048511	GO:0048511	rhythmic process	21/724	305/18866	0.00731082	0.198917	0.182588	CDK5/DTL/EGR3/ESR1/FOXO3/INHBA/KLF10/NTRK1/OPRL1/PER1/PER2/PLEKHA1/PTN/TPH1/ADORA1/BDNF/BMPR1B/GAS2/GPR176/HNF1B/TIMP4	21
GO:0042482	GO:0042482	positive regulation of odontogenesis	3/724	11/18866	0.00737178	0.198917	0.182588	EDN1/TFAP2A/CD34	3
GO:0046643	GO:0046643	regulation of gamma-delta T cell activation	3/724	11/18866	0.00737178	0.198917	0.182588	EGR3/NOD2/TCF7	3
GO:0051673	GO:0051673	membrane disruption in other organism	3/724	11/18866	0.00737178	0.198917	0.182588	DEFA3/DEFA4/LTF	3
GO:0060525	GO:0060525	prostate glandular acinus development	3/724	11/18866	0.00737178	0.198917	0.182588	ESR1/FGFR2/WDR77	3
GO:0030728	GO:0030728	ovulation	4/724	21/18866	0.00764371	0.199206	0.182853	FOXO3/INHBA/GAS2/HPGD	4
GO:0035813	GO:0035813	regulation of renal sodium excretion	4/724	21/18866	0.00764371	0.199206	0.182853	EDN1/SPX/ADORA1/NPPB	4
GO:0060216	GO:0060216	definitive hemopoiesis	4/724	21/18866	0.00764371	0.199206	0.182853	GATA1/GATA2/HOXA9/TGFBR3	4
GO:0061042	GO:0061042	vascular wound healing	4/724	21/18866	0.00764371	0.199206	0.182853	GATA2/TNFAIP3/CD34/VEGFA	4
GO:0002793	GO:0002793	positive regulation of peptide secretion	15/724	193/18866	0.00764813	0.199206	0.182853	ACHE/ADAM8/BAD/GPLD1/HCAR2/HFE/IGF1/PANX1/TGFB1/UNC13B/ADORA1/CD34/CLEC4E/FFAR4/SYTL4	15
GO:0097191	GO:0097191	extrinsic apoptotic signaling pathway	17/724	230/18866	0.00768407	0.199206	0.182853	BAD/BAK1/CAV1/FGFR1/FOXO3/GATA1/IGF1/INHBA/MOAP1/SKIL/TGFB1/TIMP3/TNFAIP3/TNFRSF12A/TRADD/BMPR1B/SCRT2	17
GO:0098657	GO:0098657	import into cell	17/724	230/18866	0.00768407	0.199206	0.182853	HFE/KCNH2/LTF/PER2/SLC12A1/SLC16A2/SLC2A1/SLC6A9/SLC8A2/SPX/WNK2/MAPK15/SLC18A2/SLC1A1/SLC22A1/SYNGR3/KCNJ16	17
GO:0010038	GO:0010038	response to metal ion	24/724	366/18866	0.00780642	0.199206	0.182853	AQP9/BAD/CAV1/DLG4/DMTN/EDN1/EIF2B5/FOSB/GPLD1/HFE/KCNMB1/KIT/LONP1/MTF1/PTK2B/SORD/SYT1/SYT15/TFAP2A/TNNC1/ACTA1/ANK3/MT1F/RYR3	24
GO:0000959	GO:0000959	mitochondrial RNA metabolic process	6/724	46/18866	0.00792761	0.199206	0.182853	AARS2/FOXO3/PNPT1/POLRMT/SARS2/SUPV3L1	6
GO:0032570	GO:0032570	response to progesterone	6/724	46/18866	0.00792761	0.199206	0.182853	BAD/CAV1/FOSB/PTN/TGFB1/PTGER2	6
GO:0061844	GO:0061844	antimicrobial humoral immune response mediated by antimicrobial peptide	8/724	75/18866	0.00793407	0.199206	0.182853	CAMP/CXCL8/DEFA3/DEFA4/LTF/PGLYRP1/S100A12/ELANE	8
GO:0030168	GO:0030168	platelet activation	13/724	158/18866	0.00796428	0.199206	0.182853	CLEC1B/DGKQ/DMTN/GATA1/GP1BA/ITGA2B/MPL/PIK3R6/PRKCH/PRKCQ/PRKG1/SELP/TRPC6	13
GO:0055074	GO:0055074	calcium ion homeostasis	29/724	468/18866	0.00797059	0.199206	0.182853	ACKR2/BAK1/CAV1/CCRL2/CD19/CDH23/CDK5/DLG4/EDN1/ESR1/GATA2/GPR174/GRIN2D/OPRL1/PTK2B/S1PR3/SLC10A7/SLC24A3/SLC8A2/TRPC5/TRPC6/ADORA1/ATP2A1/ELANE/FFAR4/MCOLN3/SLC24A4/PTGER2/RYR3	29
GO:0043552	GO:0043552	positive regulation of phosphatidylinositol 3-kinase activity	5/724	33/18866	0.0079876	0.199206	0.182853	CD19/KIT/NOD2/PTK2B/TGFB1	5
GO:0048011	GO:0048011	neurotrophin TRK receptor signaling pathway	5/724	33/18866	0.0079876	0.199206	0.182853	DDIT4/NTRK1/PPP2R5B/BDNF/DOK5	5
GO:0046849	GO:0046849	bone remodeling	9/724	91/18866	0.00816788	0.201665	0.18511	ADAM8/EPHA2/MITF/PTK2B/PTN/TGFB1/TMEM119/TNFAIP3/TPH1	9
GO:2000177	GO:2000177	regulation of neural precursor cell proliferation	9/724	91/18866	0.00816788	0.201665	0.18511	ADGRG1/FOXO3/GATA2/PTN/SLC16A2/BDNF/GLI3/VEGFA/EGF	9
GO:0030098	GO:0030098	lymphocyte differentiation	24/724	368/18866	0.00832139	0.204433	0.187651	ADAM8/BAD/BAK1/CD19/CLEC4D/CLPTM1/EGR3/INHBA/ITM2A/KIT/MYB/NTRK1/PGLYRP1/PIK3R6/PTK2B/RHOH/RUNX2/TCF7/TESPA1/TNFSF9/ZEB1/CLEC4E/GLI3/RAG1	24
GO:0006024	GO:0006024	glycosaminoglycan biosynthetic process	10/724	108/18866	0.00859135	0.207919	0.19085	ANGPT1/B4GALT4/B4GALT5/SLC10A7/ST3GAL3/ST3GAL4/TGFB1/XYLT2/DSEL/EGF	10
GO:0021872	GO:0021872	forebrain generation of neurons	7/724	61/18866	0.0086019	0.207919	0.19085	FGFR1/FGFR2/GATA2/INHBA/DCLK2/GLI3/SHANK3	7
GO:0010769	GO:0010769	regulation of cell morphogenesis involved in differentiation	21/724	310/18866	0.00871823	0.207919	0.19085	ARHGAP35/CDK5/CRKL/CUX1/DMTN/MAP2/MPL/NRCAM/PLXNC1/PPP1R9A/SEMA4D/SEMA6B/SIPA1L1/SKIL/TNFRSF12A/TRAK2/TRPC5/TRPC6/BDNF/VEGFA/SHANK3	21
GO:0072503	GO:0072503	cellular divalent inorganic cation homeostasis	30/724	492/18866	0.00874162	0.207919	0.19085	ACKR2/BAK1/CAV1/CCRL2/CD19/CDH23/CDK5/DLG4/EDN1/ESR1/GATA2/GPR174/GRIN2D/OPRL1/PTK2B/S1PR3/SLC10A7/SLC24A3/SLC8A2/TRPC5/TRPC6/ADORA1/ATP2A1/ELANE/FFAR4/MCOLN3/MT1F/SLC24A4/PTGER2/RYR3	30
GO:0048017	GO:0048017	inositol lipid-mediated signaling	15/724	196/18866	0.00875956	0.207919	0.19085	ANGPT1/EDN1/FGFR1/IGF1/KIT/NTRK1/PDGFC/PIP5K1B/PLEKHA1/PPP2R5B/SELP/SEMA4D/CD160/PITPNM2/PLCL1	15
GO:0022602	GO:0022602	ovulation cycle process	6/724	47/18866	0.00880012	0.207919	0.19085	ESR1/FOXO3/INHBA/PLEKHA1/BMPR1B/GAS2	6
GO:0043268	GO:0043268	positive regulation of potassium ion transport	6/724	47/18866	0.00880012	0.207919	0.19085	AKAP9/KCNH2/KCNMB1/WNK2/ADORA1/NOS1AP	6
GO:0048599	GO:0048599	oocyte development	6/724	47/18866	0.00880012	0.207919	0.19085	FOXO3/IGF1/PTK2B/TRIP13/WDR77/AURKC	6
GO:0030099	GO:0030099	myeloid cell differentiation	27/724	431/18866	0.00892999	0.20812	0.191036	CDKN2B/CLEC1B/DMTN/EPHA2/FOXO3/GATA1/GATA2/GP1BA/HOXA9/INHBA/ITGA2B/KIT/KLF10/LRRC17/LTF/MFHAS1/MITF/MPL/OSCAR/PRKCQ/PTK2B/SFXN1/TGFB1/TGFBR3/NFE2/TSPAN2/VEGFA	27
GO:0007050	GO:0007050	cell cycle arrest	17/724	234/18866	0.00904919	0.20812	0.191036	CDK5/CDKN1A/CDKN2B/CDKN3/CXCL8/E2F7/ERN1/GADD45A/GTSE1/INHBA/PNPT1/PPP2R5B/SETMAR/SKIL/TGFB1/WHAMM/GAS2	17
GO:1903019	GO:1903019	negative regulation of glycoprotein metabolic process	4/724	22/18866	0.00906353	0.20812	0.191036	ACOT8/ITM2A/MIR101-1/ACER2	4
GO:0035633	GO:0035633	maintenance of blood-brain barrier	5/724	34/18866	0.00907546	0.20812	0.191036	ANGPT1/ESAM/GJB6/SLC1A1/VEGFA	5
GO:0048566	GO:0048566	embryonic digestive tract development	5/724	34/18866	0.00907546	0.20812	0.191036	CXCL8/FGFR2/TCF7/GLI3/HNF1B	5
GO:0098901	GO:0098901	regulation of cardiac muscle cell action potential	5/724	34/18866	0.00907546	0.20812	0.191036	AKAP9/CAV1/PKP2/ANK3/NOS1AP	5
GO:0030900	GO:0030900	forebrain development	25/724	391/18866	0.00910369	0.20812	0.191036	ADGRG1/ARHGAP35/BAD/CDK5/CHRD/CRKL/DPCD/DYNC2H1/EIF2B5/FGFR1/FGFR2/GATA2/INHBA/KIF14/NFIB/NRGN/PRKG1/PTN/SLC2A1/TACC2/TBX19/DCLK2/FAT4/GLI3/SHANK3	25
GO:0048469	GO:0048469	cell maturation	14/724	179/18866	0.0092689	0.210304	0.19304	B4GALT5/CDKN1A/FGFR1/FOXO3/GATA2/GLDN/KIF14/NRCAM/PTK2B/RUNX2/TBX6/TRIP13/WDR77/VEGFA	14
GO:0050673	GO:0050673	epithelial cell proliferation	28/724	453/18866	0.00931643	0.210304	0.19304	AQP11/BAD/CAV1/CDKN2B/COL8A2/EGR3/EPHA2/ERN1/ESR1/FGFR1/FGFR2/GATA2/IGF1/KIT/MIR101-1/NFIB/NOD2/PTN/PTPRM/TGFB1/TGFBR3/TNFAIP3/UHRF1/WDR77/CD34/COL8A1/HNF1B/VEGFA	28
GO:0070588	GO:0070588	calcium ion transmembrane transport	21/724	312/18866	0.00933935	0.210304	0.19304	CD19/CDK5/GRIN2D/GRIN3A/OPRL1/PANX1/PTK2B/SLC24A3/SLC8A2/TRPC5/TRPC6/ANXA9/ATP2A1/CACHD1/MCOLN3/NOS1AP/SLC24A4/TRPM3/TRPM6/GEM/RYR3	21
GO:0070527	GO:0070527	platelet aggregation	7/724	62/18866	0.00938452	0.210304	0.19304	DMTN/GATA1/GP1BA/ITGA2B/MPL/PRKCQ/PRKG1	7
GO:0021819	GO:0021819	layer formation in cerebral cortex	3/724	12/18866	0.00955171	0.210304	0.19304	ADGRG1/CDK5/GLI3	3
GO:0033690	GO:0033690	positive regulation of osteoblast proliferation	3/724	12/18866	0.00955171	0.210304	0.19304	GATA1/LTF/TMEM119	3
GO:0070493	GO:0070493	thrombin-activated receptor signaling pathway	3/724	12/18866	0.00955171	0.210304	0.19304	DGKQ/GP1BA/HPGD	3
GO:2000302	GO:2000302	positive regulation of synaptic vesicle exocytosis	3/724	12/18866	0.00955171	0.210304	0.19304	CDK5/SYT1/UNC13B	3
GO:0060078	GO:0060078	regulation of postsynaptic membrane potential	12/724	144/18866	0.00958252	0.210304	0.19304	CDK5/DLG4/GRIN2D/GRIN3A/MPP2/PPP1R9A/PTK2B/SLC8A2/UNC13B/ADORA1/BDNF/SHANK3	12
GO:0070169	GO:0070169	positive regulation of biomineral tissue development	6/724	48/18866	0.00973924	0.211409	0.194054	LTF/PTN/TFAP2A/TGFB1/TMEM119/BMPR1B	6
GO:0110151	GO:0110151	positive regulation of biomineralization	6/724	48/18866	0.00973924	0.211409	0.194054	LTF/PTN/TFAP2A/TGFB1/TMEM119/BMPR1B	6
GO:0017015	GO:0017015	regulation of transforming growth factor beta receptor signaling pathway	11/724	127/18866	0.00976128	0.211409	0.194054	BAMBI/CAV1/CDKN2B/CITED2/SKIL/TGFB1/TGFBR3/ZEB1/EID2/EMILIN1/HTRA4	11
GO:0060349	GO:0060349	bone morphogenesis	9/724	94/18866	0.0100239	0.216148	0.198404	FGFR2/LTF/RUNX2/TFAP2A/TMEM119/BMPR1B/FREM1/GLI3/MMP16	9
GO:0046777	GO:0046777	protein autophosphorylation	17/724	237/18866	0.010195	0.218882	0.200913	CAV1/CDK5/DAPK2/ERN1/FGFR1/FGFR2/HCK/KIT/NTRK1/PDGFC/PPP2R5B/PTK2B/WNK2/BMX/MAPK15/VEGFA/ENPP1	17
GO:2000377	GO:2000377	regulation of reactive oxygen species metabolic process	15/724	200/18866	0.0104367	0.219304	0.201301	CAV1/CDKN1A/CRYAB/EDN1/FOXO3/GADD45A/HP/PTK2B/RAB27A/TFAP2A/TGFB1/TICAM1/CD34/NOS1AP/SLC18A2	15
GO:0035812	GO:0035812	renal sodium excretion	4/724	23/18866	0.0106447	0.219304	0.201301	EDN1/SPX/ADORA1/NPPB	4
GO:0042401	GO:0042401	cellular biogenic amine biosynthetic process	4/724	23/18866	0.0106447	0.219304	0.201301	HDC/PRG3/TPH1/AGMAT	4
GO:0051043	GO:0051043	regulation of membrane protein ectodomain proteolysis	4/724	23/18866	0.0106447	0.219304	0.201301	ADAM8/GPLD1/TIMP3/TIMP4	4
GO:0070977	GO:0070977	bone maturation	4/724	23/18866	0.0106447	0.219304	0.201301	IGF1/LTF/SEMA4D/FAT4	4
GO:2000178	GO:2000178	negative regulation of neural precursor cell proliferation	4/724	23/18866	0.0106447	0.219304	0.201301	GATA2/PTN/SLC16A2/BDNF	4
GO:0070167	GO:0070167	regulation of biomineral tissue development	9/724	95/18866	0.0107081	0.219304	0.201301	GATA1/LTF/PTK2B/PTN/TFAP2A/TGFB1/TMEM119/BMPR1B/ENPP1	9
GO:0110149	GO:0110149	regulation of biomineralization	9/724	95/18866	0.0107081	0.219304	0.201301	GATA1/LTF/PTK2B/PTN/TFAP2A/TGFB1/TMEM119/BMPR1B/ENPP1	9
GO:0046661	GO:0046661	male sex differentiation	13/724	164/18866	0.0107149	0.219304	0.201301	ADGRG1/CITED2/CRKL/ESR1/GATA1/HOXA9/INHBA/KIT/NTRK1/PLEKHA1/RAB13/BIK/TEX19	13
GO:0002237	GO:0002237	response to molecule of bacterial origin	23/724	356/18866	0.010721	0.219304	0.201301	AKAP12/BPI/CTSG/CXCL8/DEFA3/DEFA4/EDN1/FGFR2/GJB6/HCK/LTF/NOD2/PDCD1LG2/PLAA/SELP/TGFB1/TICAM1/TNFAIP3/ELANE/HPGD/STAP1/TIMP4/PTGER2	23
GO:0070231	GO:0070231	T cell apoptotic process	6/724	49/18866	0.0107476	0.219304	0.201301	ADAM8/BAK1/CLC/PRKCQ/GLI3/RAG1	6
GO:0090199	GO:0090199	regulation of release of cytochrome c from mitochondria	6/724	49/18866	0.0107476	0.219304	0.201301	BAD/BAK1/IGF1/MOAP1/HRK/BIK	6
GO:1903844	GO:1903844	regulation of cellular response to transforming growth factor beta stimulus	11/724	129/18866	0.0109058	0.221617	0.203424	BAMBI/CAV1/CDKN2B/CITED2/SKIL/TGFB1/TGFBR3/ZEB1/EID2/EMILIN1/HTRA4	11
GO:0051251	GO:0051251	positive regulation of lymphocyte activation	23/724	357/18866	0.0110598	0.223824	0.20545	ADAM8/BAD/BTLA/CAV1/CDKN1A/DPP4/EGR3/IGF1/MPL/MYB/NOD2/PDCD1LG2/PIK3R6/PRKCQ/RHOH/TESPA1/TGFB1/TICAM1/TNFSF9/CD160/GLI3/RAG1/VTCN1	23
GO:0007043	GO:0007043	cell-cell junction assembly	12/724	147/18866	0.0111835	0.225404	0.2069	ARVCF/CAV1/CLDN20/DLG5/EPHA2/ESAM/GJB6/MARVELD2/PKP2/PRKCH/RAB13/SNAI1	12
GO:1903510	GO:1903510	mucopolysaccharide metabolic process	10/724	113/18866	0.0116328	0.232773	0.213664	ANGPT1/B4GALT4/B4GALT5/SLC10A7/ST3GAL3/ST3GAL4/TGFB1/XYLT2/DSEL/EGF	10
GO:0031644	GO:0031644	regulation of nervous system process	12/724	148/18866	0.0117605	0.232773	0.213664	AKAP9/DLG4/EDN1/GRIN2D/OPRL1/PTK2B/SLC8A2/SPX/UNC13B/ADORA1/SHANK3/TENM4	12
GO:0030195	GO:0030195	negative regulation of blood coagulation	6/724	50/18866	0.0118276	0.232773	0.213664	EDN1/GP1BA/PLG/PRKG1/CD34/KRT1	6
GO:1903727	GO:1903727	positive regulation of phospholipid metabolic process	6/724	50/18866	0.0118276	0.232773	0.213664	CD19/KIT/NOD2/PTK2B/RAB38/TGFB1	6
GO:0002371	GO:0002371	dendritic cell cytokine production	3/724	13/18866	0.0120676	0.232773	0.213664	KIT/NOD2/TICAM1	3
GO:0010623	GO:0010623	programmed cell death involved in cell development	3/724	13/18866	0.0120676	0.232773	0.213664	KIT/NTRK1/BDNF	3
GO:0030497	GO:0030497	fatty acid elongation	3/724	13/18866	0.0120676	0.232773	0.213664	ELOVL7/HACD1/ELOVL6	3
GO:0033089	GO:0033089	positive regulation of T cell differentiation in thymus	3/724	13/18866	0.0120676	0.232773	0.213664	ADAM8/EGR3/TESPA1	3
GO:0042761	GO:0042761	very long-chain fatty acid biosynthetic process	3/724	13/18866	0.0120676	0.232773	0.213664	ELOVL7/HACD1/ELOVL6	3
GO:0045602	GO:0045602	negative regulation of endothelial cell differentiation	3/724	13/18866	0.0120676	0.232773	0.213664	S1PR3/ZEB1/VEGFA	3
GO:1900272	GO:1900272	negative regulation of long-term synaptic potentiation	3/724	13/18866	0.0120676	0.232773	0.213664	PPP1R9A/PTN/ADORA1	3
GO:1901216	GO:1901216	positive regulation of neuron death	9/724	97/18866	0.0121809	0.233084	0.213949	BAD/CDK5/DDIT4/FOXO3/MYB/MYBL2/PCSK9/TFAP2A/ADORA1	9
GO:0001894	GO:0001894	tissue homeostasis	18/724	261/18866	0.0122127	0.233084	0.213949	ADAM8/ANGPT1/CDH23/ESAM/GATA1/GATA2/GJB6/LTF/MTF1/NOD2/PTK2B/SLC2A1/TMEM119/TNFAIP3/CD34/KRT1/SLC1A1/VEGFA	18
GO:0032411	GO:0032411	positive regulation of transporter activity	10/724	114/18866	0.012328	0.233084	0.213949	ABCB1/AKAP9/CDK5/TRPC6/WNK2/ANK3/ATP2A1/NOS1AP/SYNGR3/SHANK3	10
GO:0098693	GO:0098693	regulation of synaptic vesicle cycle	10/724	114/18866	0.012328	0.233084	0.213949	CDK5/DGKQ/GRIN3A/PCDH17/PLAA/PPP3CC/PREPL/RIMS3/SYT1/UNC13B	10
GO:0009309	GO:0009309	amine biosynthetic process	4/724	24/18866	0.0123936	0.233084	0.213949	HDC/PRG3/TPH1/AGMAT	4
GO:0044062	GO:0044062	regulation of excretion	4/724	24/18866	0.0123936	0.233084	0.213949	EDN1/SPX/ADORA1/NPPB	4
GO:0016485	GO:0016485	protein processing	16/724	223/18866	0.0124141	0.233084	0.213949	ADAM8/ADAMTS3/BAD/BAK1/CHAC1/CTSG/DISP1/DYNC2H1/ENPEP/FKRP/HP/PCSK9/PRSS12/GLI3/MMP16/PCSK1	16
GO:0050770	GO:0050770	regulation of axonogenesis	14/724	186/18866	0.0126998	0.236122	0.216738	ARHGAP35/CDK5/MAP2/NRCAM/PLXNC1/SEMA4D/SEMA6B/SIPA1L1/SKIL/TNFRSF12A/TRAK2/TRPC5/BDNF/VEGFA	14
GO:0007156	GO:0007156	homophilic cell adhesion via plasma membrane adhesion molecules	13/724	168/18866	0.0129246	0.236122	0.216738	CDH23/ESAM/MPZL2/PCDH17/PCDH9/PCDHGA8/PCDHGB5/PTPRM/FAT4/PCDH10/PCDHA9/ROBO3/CDH15	13
GO:0090218	GO:0090218	positive regulation of lipid kinase activity	5/724	37/18866	0.0129424	0.236122	0.216738	CD19/KIT/NOD2/PTK2B/TGFB1	5
GO:0097502	GO:0097502	mannosylation	5/724	37/18866	0.0129424	0.236122	0.216738	DPY19L1/FKRP/SDF2/SDF2L1/DPY19L2	5
GO:0001657	GO:0001657	ureteric bud development	9/724	98/18866	0.0129715	0.236122	0.216738	FGFR1/FGFR2/KIF26B/BDNF/FAT4/GLI3/HNF1B/PBX1/VEGFA	9
GO:1900047	GO:1900047	negative regulation of hemostasis	6/724	51/18866	0.0129819	0.236122	0.216738	EDN1/GP1BA/PLG/PRKG1/CD34/KRT1	6
GO:0042490	GO:0042490	mechanoreceptor differentiation	7/724	66/18866	0.013041	0.236122	0.216738	CDH23/FGFR1/NTRK1/TPRN/BDNF/FAT4/MCOLN3	7
GO:0045669	GO:0045669	positive regulation of osteoblast differentiation	7/724	66/18866	0.013041	0.236122	0.216738	IGF1/LTF/RUNX2/TMEM119/BMPR1B/FFAR4/GLI3	7
GO:0006023	GO:0006023	aminoglycan biosynthetic process	10/724	115/18866	0.0130541	0.236122	0.216738	ANGPT1/B4GALT4/B4GALT5/SLC10A7/ST3GAL3/ST3GAL4/TGFB1/XYLT2/DSEL/EGF	10
GO:0031623	GO:0031623	receptor internalization	10/724	115/18866	0.0130541	0.236122	0.216738	ACHE/ANGPT1/CAV1/CXCL8/DLG4/PCSK9/RAMP1/WDR54/VEGFA/EGF	10
GO:0032535	GO:0032535	regulation of cellular component size	24/724	383/18866	0.0131322	0.236667	0.217239	AQP11/ARHGAP35/CDK5/DMTN/EDN1/ESAM/HCK/MAP2/NCKAP1/NRCAM/PPP1R9A/PTK2B/RASA1/SEMA4D/SEMA6B/SLC12A1/TMOD2/TNFRSF12A/TRPC5/WHAMM/BDNF/TENM1/VEGFA/SHANK3	24
GO:0022617	GO:0022617	extracellular matrix disassembly	8/724	82/18866	0.0132916	0.238129	0.218581	ADAM8/BMP1/CTSG/DPP4/PLG/TGFB1/ELANE/MMP16	8
GO:0001822	GO:0001822	kidney development	19/724	283/18866	0.0133098	0.238129	0.218581	ANGPT1/AQP11/DLG5/ENPEP/FGFR1/FGFR2/GCNT4/KIF26B/PCSK9/TFAP2A/BDNF/CD34/COL4A4/FAT4/GLI3/HNF1B/HPGD/PBX1/VEGFA	19
GO:0043270	GO:0043270	positive regulation of ion transport	19/724	284/18866	0.0137715	0.243051	0.223099	ABCB1/AKAP9/BAK1/CAV1/CD19/CDK5/DBI/EDN1/KCNH2/KCNMB1/PKP2/SYT1/TRPC6/WNK2/ADORA1/ANK3/ATP2A1/NOS1AP/SHANK3	19
GO:0043473	GO:0043473	pigmentation	9/724	99/18866	0.0137995	0.243051	0.223099	KIT/MITF/RAB27A/RAB27B/RAB38/GLI3/OCA2/ENPP1/MREG	9
GO:0072163	GO:0072163	mesonephric epithelium development	9/724	99/18866	0.0137995	0.243051	0.223099	FGFR1/FGFR2/KIF26B/BDNF/FAT4/GLI3/HNF1B/PBX1/VEGFA	9
GO:0072164	GO:0072164	mesonephric tubule development	9/724	99/18866	0.0137995	0.243051	0.223099	FGFR1/FGFR2/KIF26B/BDNF/FAT4/GLI3/HNF1B/PBX1/VEGFA	9
GO:0006816	GO:0006816	calcium ion transport	26/724	426/18866	0.013831	0.243051	0.223099	BAK1/CAV1/CD19/CDH23/CDK5/GRIN2D/GRIN3A/OPRL1/PANX1/PTK2B/RAMP1/SLC24A3/SLC8A2/TRPC5/TRPC6/ANXA9/ATP2A1/CACHD1/MCOLN3/NOS1AP/SLC24A4/TRPM3/TRPM6/EGF/GEM/RYR3	26
GO:0043550	GO:0043550	regulation of lipid kinase activity	7/724	67/18866	0.0140954	0.244278	0.224225	CD19/KIT/NOD2/PIK3R6/PTK2B/SOCS3/TGFB1	7
GO:0009994	GO:0009994	oocyte differentiation	6/724	52/18866	0.0142128	0.244278	0.224225	FOXO3/IGF1/PTK2B/TRIP13/WDR77/AURKC	6
GO:2001238	GO:2001238	positive regulation of extrinsic apoptotic signaling pathway	6/724	52/18866	0.0142128	0.244278	0.224225	CAV1/INHBA/SKIL/TIMP3/TNFRSF12A/BMPR1B	6
GO:0046683	GO:0046683	response to organophosphorus	11/724	134/18866	0.0142162	0.244278	0.224225	AKAP9/AQP9/DGKQ/DMTN/FOSB/P2RY2/PANX1/PER1/PNPT1/PTK2B/RYR3	11
GO:0002053	GO:0002053	positive regulation of mesenchymal cell proliferation	4/724	25/18866	0.0143159	0.244278	0.224225	CHRD/FGFR1/FGFR2/VEGFA	4
GO:0002092	GO:0002092	positive regulation of receptor internalization	4/724	25/18866	0.0143159	0.244278	0.224225	ANGPT1/PCSK9/VEGFA/EGF	4
GO:0035336	GO:0035336	long-chain fatty-acyl-CoA metabolic process	4/724	25/18866	0.0143159	0.244278	0.224225	ACOT7/ELOVL7/HACD1/ELOVL6	4
GO:1903421	GO:1903421	regulation of synaptic vesicle recycling	4/724	25/18866	0.0143159	0.244278	0.224225	CDK5/DGKQ/PLAA/PPP3CC	4
GO:0002385	GO:0002385	mucosal immune response	5/724	38/18866	0.014445	0.244278	0.224225	CAMP/DEFA3/DEFA4/LTF/CD160	5
GO:0051930	GO:0051930	regulation of sensory perception of pain	5/724	38/18866	0.014445	0.244278	0.224225	EDN1/GRIN2D/OPRL1/SPX/ADORA1	5
GO:2000144	GO:2000144	positive regulation of DNA-templated transcription, initiation	5/724	38/18866	0.014445	0.244278	0.224225	ESR1/MED30/MED4/MITF/HNF1B	5
GO:0008585	GO:0008585	female gonad development	9/724	100/18866	0.0146661	0.246523	0.226286	EIF2B5/ESR1/FOXO3/INHBA/KIT/PLEKHA1/BMPR1B/GAS2/VEGFA	9
GO:0019896	GO:0019896	axonal transport of mitochondrion	3/724	14/18866	0.0149272	0.246523	0.226286	AGBL4/TRAK2/UCHL1	3
GO:0035627	GO:0035627	ceramide transport	3/724	14/18866	0.0149272	0.246523	0.226286	ABCB1/PLEKHA3/PLEKHA8P1	3
GO:0035810	GO:0035810	positive regulation of urine volume	3/724	14/18866	0.0149272	0.246523	0.226286	EDN1/OPRL1/NPPB	3
GO:0052803	GO:0052803	imidazole-containing compound metabolic process	3/724	14/18866	0.0149272	0.246523	0.226286	HDC/PRG3/FTCD	3
GO:1900452	GO:1900452	regulation of long-term synaptic depression	3/724	14/18866	0.0149272	0.246523	0.226286	PPP1R9A/ADORA1/SHANK3	3
GO:1903054	GO:1903054	negative regulation of extracellular matrix organization	3/724	14/18866	0.0149272	0.246523	0.226286	DPP4/TGFB1/EMILIN1	3
GO:1904888	GO:1904888	cranial skeletal system development	7/724	68/18866	0.0152093	0.250345	0.229794	CRKL/FGFR2/RUNX2/TFAP2A/FREM1/GLI3/MMP16	7
GO:0045216	GO:0045216	cell-cell junction organization	15/724	210/18866	0.0157416	0.256466	0.235412	ARVCF/CAV1/CLDN20/DLG5/EPHA2/ESAM/GJB6/MARVELD2/PKP2/PRKCH/RAB13/SNAI1/TGFB1/VEGFA/CDH15	15
GO:0032691	GO:0032691	negative regulation of interleukin-1 beta production	5/724	39/18866	0.0160602	0.256466	0.235412	IGF1/MEFV/MIR101-1/TNFAIP3/FFAR4	5
GO:0038179	GO:0038179	neurotrophin signaling pathway	5/724	39/18866	0.0160602	0.256466	0.235412	DDIT4/NTRK1/PPP2R5B/BDNF/DOK5	5
GO:0051931	GO:0051931	regulation of sensory perception	5/724	39/18866	0.0160602	0.256466	0.235412	EDN1/GRIN2D/OPRL1/SPX/ADORA1	5
GO:2000249	GO:2000249	regulation of actin cytoskeleton reorganization	5/724	39/18866	0.0160602	0.256466	0.235412	CDK5/ESAM/HCK/PTK2B/STAP1	5
GO:0007160	GO:0007160	cell-matrix adhesion	16/724	230/18866	0.0162291	0.256466	0.235412	CDK5/DMTN/ITGA2B/ITGB7/ITGBL1/OTOA/PTK2B/RASA1/TMEM8B/WHAMM/ACER2/CD34/EMILIN1/FREM1/SGCE/VEGFA	16
GO:0006767	GO:0006767	water-soluble vitamin metabolic process	8/724	85/18866	0.0162538	0.256466	0.235412	ALDH1L2/LMBRD1/SLC2A1/VNN2/VNN3/GSTO2/ENPP1/TCN1	8
GO:0006970	GO:0006970	response to osmotic stress	8/724	85/18866	0.0162538	0.256466	0.235412	ABCB1/AQP9/BAD/MBIP/PTK2B/SLC2A1/SORD/TSC22D2	8
GO:0032092	GO:0032092	positive regulation of protein binding	8/724	85/18866	0.0162538	0.256466	0.235412	BAMBI/CAV1/CDK5/HFE/RAMP1/TICAM1/BDNF/PLCL1	8
GO:0043297	GO:0043297	apical junction assembly	8/724	85/18866	0.0162538	0.256466	0.235412	CLDN20/DLG5/EPHA2/ESAM/MARVELD2/PRKCH/RAB13/SNAI1	8
GO:0110110	GO:0110110	positive regulation of animal organ morphogenesis	8/724	85/18866	0.0162538	0.256466	0.235412	EDN1/FGFR1/FGFR2/PTN/TFAP2A/TNFAIP3/CD34/VEGFA	8
GO:0046660	GO:0046660	female sex differentiation	10/724	119/18866	0.0162829	0.256466	0.235412	BAK1/EIF2B5/ESR1/FOXO3/INHBA/KIT/PLEKHA1/BMPR1B/GAS2/VEGFA	10
GO:0044272	GO:0044272	sulfur compound biosynthetic process	14/724	192/18866	0.0163611	0.256466	0.235412	ANGPT1/B4GALT4/B4GALT5/CHAC1/ELOVL7/HACD1/MTAP/SLC10A7/ST3GAL3/ST3GAL4/XYLT2/DSEL/GSTO2/ELOVL6	14
GO:0002227	GO:0002227	innate immune response in mucosa	4/724	26/18866	0.016417	0.256466	0.235412	CAMP/DEFA3/DEFA4/LTF	4
GO:0060706	GO:0060706	cell differentiation involved in embryonic placenta development	4/724	26/18866	0.016417	0.256466	0.235412	E2F7/PLG/SNAI1/SOCS3	4
GO:0070633	GO:0070633	transepithelial transport	4/724	26/18866	0.016417	0.256466	0.235412	ABCB1/EDN1/GPLD1/SLC1A1	4
GO:0050773	GO:0050773	regulation of dendrite development	12/724	155/18866	0.0164641	0.256466	0.235412	CDK5/CRKL/CUX1/DLG5/PPP1R9A/PTN/SEMA4D/SIPA1L1/TMEM106B/TRPC5/TRPC6/SHANK3	12
GO:0051099	GO:0051099	positive regulation of binding	13/724	174/18866	0.0168773	0.262075	0.240561	BAMBI/CAV1/CDK5/EDF1/HFE/IGF1/KDM4D/RAMP1/TGFB1/TICAM1/BDNF/EGF/PLCL1	13
GO:0001776	GO:0001776	leukocyte homeostasis	8/724	86/18866	0.0173394	0.268408	0.246374	BAK1/GPR174/HCAR2/MPL/SIT1/SKIL/TNFAIP3/RAG1	8
GO:0001823	GO:0001823	mesonephros development	9/724	103/18866	0.0175065	0.269305	0.247198	FGFR1/FGFR2/KIF26B/BDNF/FAT4/GLI3/HNF1B/PBX1/VEGFA	9
GO:0060079	GO:0060079	excitatory postsynaptic potential	9/724	103/18866	0.0175065	0.269305	0.247198	CDK5/DLG4/GRIN2D/MPP2/PPP1R9A/PTK2B/SLC8A2/ADORA1/SHANK3	9
GO:0006730	GO:0006730	one-carbon metabolic process	5/724	40/18866	0.0177913	0.269743	0.247599	ALDH1L2/SFXN1/CA12/CA4/FTCD	5
GO:0009072	GO:0009072	aromatic amino acid family metabolic process	5/724	40/18866	0.0177913	0.269743	0.247599	AFMID/HDC/IL4I1/TPH1/FTCD	5
GO:1901381	GO:1901381	positive regulation of potassium ion transmembrane transport	5/724	40/18866	0.0177913	0.269743	0.247599	AKAP9/KCNH2/KCNMB1/WNK2/NOS1AP	5
GO:0072001	GO:0072001	renal system development	19/724	292/18866	0.0179355	0.269743	0.247599	ANGPT1/AQP11/DLG5/ENPEP/FGFR1/FGFR2/GCNT4/KIF26B/PCSK9/TFAP2A/BDNF/CD34/COL4A4/FAT4/GLI3/HNF1B/HPGD/PBX1/VEGFA	19
GO:0030218	GO:0030218	erythrocyte differentiation	10/724	121/18866	0.018103	0.269743	0.247599	DMTN/FOXO3/GATA1/GATA2/INHBA/KIT/MFHAS1/SFXN1/TGFBR3/VEGFA	10
GO:0010763	GO:0010763	positive regulation of fibroblast migration	3/724	15/18866	0.0181358	0.269743	0.247599	AKAP12/DMTN/TGFB1	3
GO:0034349	GO:0034349	glial cell apoptotic process	3/724	15/18866	0.0181358	0.269743	0.247599	AKAP12/CDK5/PRKCH	3
GO:0050862	GO:0050862	positive regulation of T cell receptor signaling pathway	3/724	15/18866	0.0181358	0.269743	0.247599	CD226/TESPA1/TRAT1	3
GO:0070207	GO:0070207	protein homotrimerization	3/724	15/18866	0.0181358	0.269743	0.247599	DISP1/PNPT1/STEAP4	3
GO:0099171	GO:0099171	presynaptic modulation of chemical synaptic transmission	3/724	15/18866	0.0181358	0.269743	0.247599	CDK5/PLEKHG5/SYT1	3
GO:1902043	GO:1902043	positive regulation of extrinsic apoptotic signaling pathway via death domain receptors	3/724	15/18866	0.0181358	0.269743	0.247599	SKIL/TIMP3/BMPR1B	3
GO:0090130	GO:0090130	tissue migration	23/724	374/18866	0.0182562	0.270244	0.248059	ANGPT1/DPP4/EDN1/EGR3/EPHA2/FGFR1/GADD45A/GATA2/GPLD1/KIT/LGALS12/MIR101-1/PLEKHG5/PTK2B/PTN/PTPRM/RAB13/S100P/TDGF1/TGFB1/ACTA1/CARD10/VEGFA	23
GO:0030217	GO:0030217	T cell differentiation	17/724	253/18866	0.0183839	0.270244	0.248059	ADAM8/BAD/CLEC4D/CLPTM1/EGR3/KIT/MYB/PIK3R6/RHOH/RUNX2/TCF7/TESPA1/TNFSF9/ZEB1/CLEC4E/GLI3/RAG1	17
GO:0003229	GO:0003229	ventricular cardiac muscle tissue development	6/724	55/18866	0.0183884	0.270244	0.248059	FGFR2/PKP2/PPP1R13L/TGFB1/TGFBR3/TNNC1	6
GO:0050819	GO:0050819	negative regulation of coagulation	6/724	55/18866	0.0183884	0.270244	0.248059	EDN1/GP1BA/PLG/PRKG1/CD34/KRT1	6
GO:0030512	GO:0030512	negative regulation of transforming growth factor beta receptor signaling pathway	8/724	87/18866	0.0184762	0.270728	0.248503	BAMBI/CAV1/SKIL/TGFB1/TGFBR3/EID2/EMILIN1/HTRA4	8
GO:0042481	GO:0042481	regulation of odontogenesis	4/724	27/18866	0.0187012	0.271608	0.249311	EDN1/RUNX2/TFAP2A/CD34	4
GO:0048799	GO:0048799	animal organ maturation	4/724	27/18866	0.0187012	0.271608	0.249311	IGF1/LTF/SEMA4D/FAT4	4
GO:1900120	GO:1900120	regulation of receptor binding	4/724	27/18866	0.0187012	0.271608	0.249311	HFE/PCSK9/BDNF/PLCL1	4
GO:0015800	GO:0015800	acidic amino acid transport	7/724	71/18866	0.0189248	0.274048	0.251551	PER2/SLC25A22/SYT1/UNC13B/ADORA1/BDNF/SLC1A1	7
GO:0000819	GO:0000819	sister chromatid segregation	14/724	196/18866	0.0192172	0.277469	0.254691	CDC16/CDCA8/CENPK/DSCC1/HORMAD1/KIF14/KPNB1/MAP10/MEIKIN/NDC80/TRIP13/ZWINT/AURKC/MAPK15	14
GO:0001667	GO:0001667	ameboidal-type cell migration	28/724	481/18866	0.0193342	0.278345	0.255495	AKAP12/ANGPT1/CRB2/DMTN/DPP4/EDN1/EGR3/EPHA2/FGFR1/GADD45A/GATA2/GPLD1/ITGB7/KIT/LGALS12/MIR101-1/PLEKHG5/PTK2B/PTN/PTPRM/RAB13/S100P/SEMA4D/SEMA6B/TDGF1/TGFB1/CARD10/VEGFA	28
GO:0040013	GO:0040013	negative regulation of locomotion	24/724	397/18866	0.0194252	0.278842	0.255952	ADGRG1/CHRD/CITED2/DLG5/DPP4/FOXO3/GADD45A/MIR101-1/MITF/PADI2/PRKG1/PTN/PTPRM/SEMA4D/SEMA6B/TGFB1/ADORA1/CARD10/ELANE/EMILIN1/MAPK15/PIP5KL1/STAP1/NAV3	24
GO:0046545	GO:0046545	development of primary female sexual characteristics	9/724	105/18866	0.0196103	0.279043	0.256136	EIF2B5/ESR1/FOXO3/INHBA/KIT/PLEKHA1/BMPR1B/GAS2/VEGFA	9
GO:0002251	GO:0002251	organ or tissue specific immune response	5/724	41/18866	0.0196414	0.279043	0.256136	CAMP/DEFA3/DEFA4/LTF/CD160	5
GO:0071548	GO:0071548	response to dexamethasone	5/724	41/18866	0.0196414	0.279043	0.256136	DDIT4/EDN1/FOXO3/SMYD3/FBXO32	5
GO:0014068	GO:0014068	positive regulation of phosphatidylinositol 3-kinase signaling	8/724	88/18866	0.0196652	0.279043	0.256136	ANGPT1/FGFR1/IGF1/KIT/NTRK1/PDGFC/SELP/SEMA4D	8
GO:1902107	GO:1902107	positive regulation of leukocyte differentiation	12/724	159/18866	0.019722	0.279046	0.256139	ADAM8/BAD/EGR3/KLF10/MYB/PIK3R6/RHOH/TESPA1/TGFB1/TNFSF9/GLI3/RAG1	12
GO:0043113	GO:0043113	receptor clustering	6/724	56/18866	0.0199485	0.281181	0.258099	CDK5/CRKL/DLG4/ITGB7/PTN/SHANK3	6
GO:0048839	GO:0048839	inner ear development	14/724	197/18866	0.0199868	0.281181	0.258099	CDH23/FGFR1/FGFR2/GATA2/GJB6/LIN7A/PVALB/TFAP2A/TPRN/ZEB1/BDNF/FAT4/GLI3/MCOLN3	14
GO:0070252	GO:0070252	actin-mediated cell contraction	10/724	123/18866	0.0200687	0.281532	0.258421	AKAP9/CAV1/KCNH2/MYL6B/PKP2/TNNC1/ACTA1/ADORA1/ATP2A1/NOS1AP	10
GO:0060560	GO:0060560	developmental growth involved in morphogenesis	16/724	236/18866	0.0201703	0.282155	0.258992	CDK5/ESR1/FGFR2/KIF26B/MAP2/NRCAM/PLAA/RNF157/SEMA4D/SEMA6B/SYT1/TNFRSF12A/TRPC5/BDNF/HNF1B/VEGFA	16
GO:0032414	GO:0032414	positive regulation of ion transmembrane transporter activity	9/724	106/18866	0.0207282	0.284108	0.260785	ABCB1/AKAP9/CDK5/TRPC6/WNK2/ANK3/ATP2A1/NOS1AP/SHANK3	9
GO:2000379	GO:2000379	positive regulation of reactive oxygen species metabolic process	9/724	106/18866	0.0207282	0.284108	0.260785	CDKN1A/EDN1/FOXO3/GADD45A/PTK2B/RAB27A/TGFB1/TICAM1/NOS1AP	9
GO:0043112	GO:0043112	receptor metabolic process	14/724	198/18866	0.0207794	0.284108	0.260785	ACHE/ANGPT1/CAV1/CDK5/CXCL8/DLG4/EDN1/PCSK9/RAMP1/TGFB1/TRAT1/WDR54/VEGFA/EGF	14
GO:0042326	GO:0042326	negative regulation of phosphorylation	28/724	484/18866	0.0207828	0.284108	0.260785	ANGPT1/BAK1/CAV1/CDKN1A/CDKN2B/CRKL/DDIT4/DGKQ/DMTN/GADD45A/INHBA/MBIP/MIDN/PER1/RHOH/SEMA4D/SMYD3/SOCS3/TGFB1/TIMP3/TNFAIP3/UCHL1/WNK2/EMILIN1/PIP5KL1/PKIA/STAP1/ENPP1	28
GO:0008625	GO:0008625	extrinsic apoptotic signaling pathway via death domain receptors	8/724	89/18866	0.0209078	0.284108	0.260785	BAD/MOAP1/SKIL/TIMP3/TNFAIP3/TRADD/BMPR1B/SCRT2	8
GO:1903845	GO:1903845	negative regulation of cellular response to transforming growth factor beta stimulus	8/724	89/18866	0.0209078	0.284108	0.260785	BAMBI/CAV1/SKIL/TGFB1/TGFBR3/EID2/EMILIN1/HTRA4	8
GO:0030879	GO:0030879	mammary gland development	11/724	142/18866	0.0210175	0.284108	0.260785	ARHGAP35/CAV1/EPHA2/ESR1/FGFR2/HOXA9/TDGF1/TPH1/GLI3/VEGFA/EGF	11
GO:0072073	GO:0072073	kidney epithelium development	11/724	142/18866	0.0210175	0.284108	0.260785	AQP11/FGFR1/FGFR2/KIF26B/BDNF/CD34/FAT4/GLI3/HNF1B/PBX1/VEGFA	11
GO:0051271	GO:0051271	negative regulation of cellular component movement	24/724	400/18866	0.0210397	0.284108	0.260785	ADGRG1/CHRD/CITED2/DLG5/DPP4/FOXO3/GADD45A/MIR101-1/MITF/PADI2/PRKG1/PTN/PTPRM/SEMA4D/SEMA6B/TGFB1/TGFBR3/ADORA1/CARD10/EMILIN1/MAPK15/PIP5KL1/STAP1/NAV3	24
GO:0022612	GO:0022612	gland morphogenesis	10/724	124/18866	0.021108	0.284108	0.260785	CAV1/EPHA2/ESR1/FGFR1/FGFR2/NFIB/PTN/TGFB1/TNFAIP3/GLI3	10
GO:0003180	GO:0003180	aortic valve morphogenesis	4/724	28/18866	0.0211729	0.284108	0.260785	NFATC1/SNAI1/TGFB1/EMILIN1	4
GO:0009074	GO:0009074	aromatic amino acid family catabolic process	4/724	28/18866	0.0211729	0.284108	0.260785	AFMID/HDC/IL4I1/FTCD	4
GO:0018146	GO:0018146	keratan sulfate biosynthetic process	4/724	28/18866	0.0211729	0.284108	0.260785	B4GALT4/B4GALT5/ST3GAL3/ST3GAL4	4
GO:0021846	GO:0021846	cell proliferation in forebrain	4/724	28/18866	0.0211729	0.284108	0.260785	FGFR1/FGFR2/KIF14/GLI3	4
GO:0051883	GO:0051883	killing of cells in other organism involved in symbiotic interaction	4/724	28/18866	0.0211729	0.284108	0.260785	BAD/CAMP/CTSG/ELANE	4
GO:0034767	GO:0034767	positive regulation of ion transmembrane transport	12/724	161/18866	0.0215205	0.286125	0.262637	ABCB1/AKAP9/CD19/CDK5/KCNH2/KCNMB1/TRPC6/WNK2/ANK3/ATP2A1/NOS1AP/SHANK3	12
GO:0002090	GO:0002090	regulation of receptor internalization	6/724	57/18866	0.0215962	0.286125	0.262637	ANGPT1/DLG4/PCSK9/WDR54/VEGFA/EGF	6
GO:0098900	GO:0098900	regulation of action potential	6/724	57/18866	0.0215962	0.286125	0.262637	AKAP9/CAV1/PKP2/SLC8A2/ANK3/NOS1AP	6
GO:0001504	GO:0001504	neurotransmitter uptake	5/724	42/18866	0.0216131	0.286125	0.262637	PER2/SLC6A9/SLC18A2/SLC22A1/SYNGR3	5
GO:0006509	GO:0006509	membrane protein ectodomain proteolysis	5/724	42/18866	0.0216131	0.286125	0.262637	ADAM8/GPLD1/PRKCQ/TIMP3/TIMP4	5
GO:0002523	GO:0002523	leukocyte migration involved in inflammatory response	3/724	16/18866	0.0216965	0.286125	0.262637	ADAM8/PTN/ELANE	3
GO:0070227	GO:0070227	lymphocyte apoptotic process	7/724	73/18866	0.0217288	0.286125	0.262637	ADAM8/BAK1/CLC/CRKL/PRKCQ/GLI3/RAG1	7
GO:0043266	GO:0043266	regulation of potassium ion transport	9/724	107/18866	0.0218912	0.286734	0.263195	AKAP9/CAV1/KCNH2/KCNMB1/PTK2B/WNK2/ADORA1/ANK3/NOS1AP	9
GO:1903426	GO:1903426	regulation of reactive oxygen species biosynthetic process	9/724	107/18866	0.0218912	0.286734	0.263195	CAV1/EDN1/FOXO3/PTK2B/RAB27A/TICAM1/CD34/NOS1AP/SLC18A2	9
GO:0072006	GO:0072006	nephron development	11/724	143/18866	0.0220114	0.287546	0.263941	ANGPT1/AQP11/ENPEP/KIF26B/CD34/COL4A4/FAT4/GLI3/HNF1B/PBX1/VEGFA	11
GO:0048593	GO:0048593	camera-type eye morphogenesis	10/724	125/18866	0.022186	0.289062	0.265332	BAK1/COL8A2/EPHA2/PTN/PTPRM/TFAP2A/ZEB1/COL8A1/GLI3/VEGFA	10
GO:1901654	GO:1901654	response to ketone	14/724	200/18866	0.0224354	0.290325	0.266492	BAD/CAV1/CDKN1A/DDIT4/EDN1/FOSB/FOXO3/MTAP/PTN/SMYD3/TGFB1/TGFBR3/FBXO32/PTGER2	14
GO:2001236	GO:2001236	regulation of extrinsic apoptotic signaling pathway	12/724	162/18866	0.022464	0.290325	0.266492	CAV1/FGFR1/GATA1/IGF1/INHBA/SKIL/TIMP3/TNFAIP3/TNFRSF12A/TRADD/BMPR1B/SCRT2	12
GO:0008361	GO:0008361	regulation of cell size	13/724	181/18866	0.0225769	0.290325	0.266492	AQP11/CDK5/EDN1/MAP2/NRCAM/SEMA4D/SEMA6B/SLC12A1/TNFRSF12A/TRPC5/BDNF/VEGFA/SHANK3	13
GO:0048736	GO:0048736	appendage development	13/724	181/18866	0.0225769	0.290325	0.266492	B9D1/BAK1/DYNC2H1/FGFR1/FGFR2/HOXA9/PBX2/RUNX2/TFAP2A/TMEM107/BMPR1B/GLI3/PBX1	13
GO:0060173	GO:0060173	limb development	13/724	181/18866	0.0225769	0.290325	0.266492	B9D1/BAK1/DYNC2H1/FGFR1/FGFR2/HOXA9/PBX2/RUNX2/TFAP2A/TMEM107/BMPR1B/GLI3/PBX1	13
GO:0001909	GO:0001909	leukocyte mediated cytotoxicity	9/724	108/18866	0.0231002	0.295515	0.271256	CD1E/CD226/CTSG/DNASE1/PIK3R6/RAB27A/CD160/ELANE/STAP1	9
GO:0071887	GO:0071887	leukocyte apoptotic process	9/724	108/18866	0.0231002	0.295515	0.271256	ADAM8/BAK1/CLC/CRKL/HCAR2/NOD2/PRKCQ/GLI3/RAG1	9
GO:0086003	GO:0086003	cardiac muscle cell contraction	7/724	74/18866	0.0232335	0.296452	0.272116	AKAP9/CAV1/KCNH2/PKP2/ADORA1/ATP2A1/NOS1AP	7
GO:0001763	GO:0001763	morphogenesis of a branching structure	14/724	201/18866	0.0232996	0.296529	0.272186	DLG5/EDN1/EPHA2/ESR1/FGFR1/FGFR2/SOCS3/TDGF1/FAT4/GLI3/HNF1B/PBX1/VEGFA/EGF	14
GO:0090317	GO:0090317	negative regulation of intracellular protein transport	5/724	43/18866	0.0237091	0.300965	0.276258	ANGPT1/CDK5/DMTN/LMAN1/PKIA	5
GO:0007020	GO:0007020	microtubule nucleation	4/724	29/18866	0.0238353	0.301009	0.276299	AKAP9/CEP192/EML2/SLAIN2	4
GO:0050855	GO:0050855	regulation of B cell receptor signaling pathway	4/724	29/18866	0.0238353	0.301009	0.276299	CD19/GCSAML/PRKCH/STAP1	4
GO:0016049	GO:0016049	cell growth	28/724	490/18866	0.0239352	0.301009	0.276299	CDA/CDK5/CDKN1A/CRKL/CRYAB/EDN1/IGF1/INHBA/KIF14/MAP2/NRCAM/PLAA/PRKCQ/PTK2B/RBBP7/RNF157/SEMA4D/SEMA6B/SPOCK1/SUPV3L1/SYT1/TGFB1/TNFRSF12A/TRPC5/BDNF/NPPB/VEGFA/ENPP1	28
GO:0001654	GO:0001654	eye development	23/724	384/18866	0.0239564	0.301009	0.276299	ACHE/ARHGAP35/B9D1/BAK1/COL8A2/CRYAB/EPHA2/INHBA/MITF/PBX2/PBX4/PPP1R13L/PTN/PTPRM/SKIL/TFAP2A/ZEB1/BDNF/BMPR1B/COL8A1/GLI3/PBX1/VEGFA	23
GO:0007612	GO:0007612	learning	11/724	145/18866	0.024102	0.30207	0.277272	CDK5/DLG4/KIT/NRGN/NRXN3/OPRL1/PTN/RIN1/SLC8A2/RAG1/SHANK3	11
GO:2001235	GO:2001235	positive regulation of apoptotic signaling pathway	13/724	183/18866	0.0244414	0.302725	0.277874	BAD/BAK1/CAV1/INHBA/MOAP1/PPP3CC/SKIL/TIMP3/TNFRSF12A/TPD52L1/BMPR1B/HRK/BIK	13
GO:0098727	GO:0098727	maintenance of cell number	12/724	164/18866	0.0244421	0.302725	0.277874	FOXO3/GATA2/IGF1/KIT/KLF10/MED30/PADI4/PTN/TDGF1/HNF1B/PBX1/TET1	12
GO:0014066	GO:0014066	regulation of phosphatidylinositol 3-kinase signaling	10/724	127/18866	0.0244608	0.302725	0.277874	ANGPT1/FGFR1/IGF1/KIT/NTRK1/PDGFC/PIP5K1B/PPP2R5B/SELP/SEMA4D	10
GO:0030326	GO:0030326	embryonic limb morphogenesis	10/724	127/18866	0.0244608	0.302725	0.277874	B9D1/DYNC2H1/FGFR1/HOXA9/PBX2/RUNX2/TFAP2A/TMEM107/GLI3/PBX1	10
GO:0035113	GO:0035113	embryonic appendage morphogenesis	10/724	127/18866	0.0244608	0.302725	0.277874	B9D1/DYNC2H1/FGFR1/HOXA9/PBX2/RUNX2/TFAP2A/TMEM107/GLI3/PBX1	10
GO:0019722	GO:0019722	calcium-mediated signaling	15/724	222/18866	0.0246063	0.303228	0.278335	ACKR2/CCRL2/CXCL8/DMTN/EDN1/GRIN2D/IGF1/NFATC1/PPP1R9A/PPP3CC/PTGDR2/PTK2B/SELP/SLC8A2/TRAT1	15
GO:0006813	GO:0006813	potassium ion transport	16/724	242/18866	0.024802	0.303228	0.278335	AKAP9/CAV1/KCNH2/KCNK13/KCNMB1/PTK2B/SLC12A1/SLC24A3/WNK2/ADORA1/ANK3/KCNQ5/NOS1AP/SLC24A4/KCNJ16/KCNS3	16
GO:0038034	GO:0038034	signal transduction in absence of ligand	7/724	75/18866	0.0248084	0.303228	0.278335	BAD/BAK1/FGFR1/FOXO3/GATA1/INHBA/MOAP1	7
GO:0050805	GO:0050805	negative regulation of synaptic transmission	7/724	75/18866	0.0248084	0.303228	0.278335	ACHE/PCDH17/PPP1R9A/PTK2B/ADORA1/BDNF/SHANK3	7
GO:0097192	GO:0097192	extrinsic apoptotic signaling pathway in absence of ligand	7/724	75/18866	0.0248084	0.303228	0.278335	BAD/BAK1/FGFR1/FOXO3/GATA1/INHBA/MOAP1	7
GO:0019731	GO:0019731	antibacterial humoral response	6/724	59/18866	0.0251619	0.304246	0.27927	CAMP/CTSG/DEFA3/DEFA4/LTF/ELANE	6
GO:0031663	GO:0031663	lipopolysaccharide-mediated signaling pathway	6/724	59/18866	0.0251619	0.304246	0.27927	BPI/HCK/LTF/TGFB1/TICAM1/TNFAIP3	6
GO:0043525	GO:0043525	positive regulation of neuron apoptotic process	6/724	59/18866	0.0251619	0.304246	0.27927	CDK5/FOXO3/MYB/MYBL2/PCSK9/TFAP2A	6
GO:0010631	GO:0010631	epithelial cell migration	22/724	365/18866	0.0251982	0.304246	0.27927	ANGPT1/DPP4/EDN1/EGR3/EPHA2/FGFR1/GADD45A/GATA2/GPLD1/KIT/LGALS12/MIR101-1/PLEKHG5/PTK2B/PTN/PTPRM/RAB13/S100P/TDGF1/TGFB1/CARD10/VEGFA	22
GO:0042542	GO:0042542	response to hydrogen peroxide	11/724	146/18866	0.0251998	0.304246	0.27927	BAD/BAK1/CRYAB/FOXO3/HP/MYB/PLEKHA1/PTK2B/PYCR1/TNFAIP3/TRPC6	11
GO:0010566	GO:0010566	regulation of ketone biosynthetic process	3/724	17/18866	0.0256101	0.30473	0.279714	DGKQ/PPTC7/DKKL1	3
GO:0021514	GO:0021514	ventral spinal cord interneuron differentiation	3/724	17/18866	0.0256101	0.30473	0.279714	GATA2/LMO4/GLI3	3
GO:0043117	GO:0043117	positive regulation of vascular permeability	3/724	17/18866	0.0256101	0.30473	0.279714	ANGPT1/TGFB1/VEGFA	3
GO:0070206	GO:0070206	protein trimerization	3/724	17/18866	0.0256101	0.30473	0.279714	DISP1/PNPT1/STEAP4	3
GO:0071850	GO:0071850	mitotic cell cycle arrest	3/724	17/18866	0.0256101	0.30473	0.279714	CDKN1A/GADD45A/PNPT1	3
GO:0097094	GO:0097094	craniofacial suture morphogenesis	3/724	17/18866	0.0256101	0.30473	0.279714	FREM1/GLI3/MMP16	3
GO:0051592	GO:0051592	response to calcium ion	11/724	147/18866	0.0263335	0.309394	0.283995	BAD/CAV1/DMTN/EDN1/FOSB/GPLD1/KCNMB1/PTK2B/SYT1/SYT15/RYR3	11
GO:0019935	GO:0019935	cyclic-nucleotide-mediated signaling	15/724	224/18866	0.026388	0.309394	0.283995	ADGRE3/ADGRG1/ADGRG5/ADGRL2/DGKQ/OPRL1/PRKG1/PTK2B/RAMP1/RNF157/S1PR3/ADGRL3/FFAR4/NPPB/PTGER2	15
GO:0043583	GO:0043583	ear development	15/724	224/18866	0.026388	0.309394	0.283995	CDH23/EDN1/FGFR1/FGFR2/GATA2/GJB6/LIN7A/PVALB/TFAP2A/TPRN/ZEB1/BDNF/FAT4/GLI3/MCOLN3	15
GO:0033077	GO:0033077	T cell differentiation in thymus	7/724	76/18866	0.026455	0.309394	0.283995	ADAM8/CLPTM1/EGR3/TESPA1/ZEB1/GLI3/RAG1	7
GO:0150063	GO:0150063	visual system development	23/724	388/18866	0.026587	0.309394	0.283995	ACHE/ARHGAP35/B9D1/BAK1/COL8A2/CRYAB/EPHA2/INHBA/MITF/PBX2/PBX4/PPP1R13L/PTN/PTPRM/SKIL/TFAP2A/ZEB1/BDNF/BMPR1B/COL8A1/GLI3/PBX1/VEGFA	23
GO:0010800	GO:0010800	positive regulation of peptidyl-threonine phosphorylation	4/724	30/18866	0.0266913	0.309394	0.283995	TGFB1/TRPC5/TRPC6/EGF	4
GO:0033688	GO:0033688	regulation of osteoblast proliferation	4/724	30/18866	0.0266913	0.309394	0.283995	FGFR2/GATA1/LTF/TMEM119	4
GO:0034110	GO:0034110	regulation of homotypic cell-cell adhesion	4/724	30/18866	0.0266913	0.309394	0.283995	DMTN/PRKCQ/PRKG1/ANK3	4
GO:0060055	GO:0060055	angiogenesis involved in wound healing	4/724	30/18866	0.0266913	0.309394	0.283995	GATA2/TNFAIP3/CD34/VEGFA	4
GO:0070168	GO:0070168	negative regulation of biomineral tissue development	4/724	30/18866	0.0266913	0.309394	0.283995	GATA1/PTK2B/TGFB1/ENPP1	4
GO:0110150	GO:0110150	negative regulation of biomineralization	4/724	30/18866	0.0266913	0.309394	0.283995	GATA1/PTK2B/TGFB1/ENPP1	4
GO:0034101	GO:0034101	erythrocyte homeostasis	10/724	129/18866	0.0268988	0.310296	0.284823	DMTN/FOXO3/GATA1/GATA2/INHBA/KIT/MFHAS1/SFXN1/TGFBR3/VEGFA	10
GO:0061387	GO:0061387	regulation of extent of cell growth	9/724	111/18866	0.0270126	0.310296	0.284823	CDK5/MAP2/NRCAM/SEMA4D/SEMA6B/TNFRSF12A/TRPC5/BDNF/VEGFA	9
GO:0001836	GO:0001836	release of cytochrome c from mitochondria	6/724	60/18866	0.0270834	0.310296	0.284823	BAD/BAK1/IGF1/MOAP1/HRK/BIK	6
GO:1903428	GO:1903428	positive regulation of reactive oxygen species biosynthetic process	6/724	60/18866	0.0270834	0.310296	0.284823	EDN1/FOXO3/PTK2B/RAB27A/TICAM1/NOS1AP	6
GO:2000242	GO:2000242	negative regulation of reproductive process	6/724	60/18866	0.0270834	0.310296	0.284823	HORMAD1/IGF1/PTGDR2/SNAI1/TRIP13/WDR77	6
GO:0090132	GO:0090132	epithelium migration	22/724	368/18866	0.0272907	0.311354	0.285794	ANGPT1/DPP4/EDN1/EGR3/EPHA2/FGFR1/GADD45A/GATA2/GPLD1/KIT/LGALS12/MIR101-1/PLEKHG5/PTK2B/PTN/PTPRM/RAB13/S100P/TDGF1/TGFB1/CARD10/VEGFA	22
GO:0032412	GO:0032412	regulation of ion transmembrane transporter activity	17/724	265/18866	0.0273018	0.311354	0.285794	ABCB1/AKAP9/CAV1/CDK5/DLG4/OPRL1/PCSK9/PTK2B/SLC6A9/TRPC6/WNK2/ANK3/ATP2A1/CNIH3/NOS1AP/GEM/SHANK3	17
GO:0051591	GO:0051591	response to cAMP	8/724	94/18866	0.0279622	0.31815	0.292033	AKAP9/AQP9/DGKQ/DMTN/FOSB/PER1/PNPT1/PTK2B	8
GO:0070830	GO:0070830	bicellular tight junction assembly	7/724	77/18866	0.0281745	0.319211	0.293006	CLDN20/EPHA2/ESAM/MARVELD2/PRKCH/RAB13/SNAI1	7
GO:0014047	GO:0014047	glutamate secretion	5/724	45/18866	0.0282834	0.319211	0.293006	SYT1/UNC13B/ADORA1/BDNF/SLC1A1	5
GO:0060443	GO:0060443	mammary gland morphogenesis	5/724	45/18866	0.0282834	0.319211	0.293006	CAV1/EPHA2/ESR1/FGFR2/GLI3	5
GO:0032102	GO:0032102	negative regulation of response to external stimulus	25/724	433/18866	0.0283631	0.319211	0.293006	DPP4/EDN1/GP1BA/GRIN3A/IGF1/LTF/MEFV/MFHAS1/PADI2/PGLYRP1/PLG/PRKG1/SEMA4D/SEMA6B/SOCS3/SPX/TNFAIP3/TSPAN6/ADORA1/CD34/ELANE/FFAR4/IL22RA2/KRT1/STAP1	25
GO:0005976	GO:0005976	polysaccharide metabolic process	9/724	112/18866	0.0284146	0.319211	0.293006	B4GALT5/CHIT1/GBE1/IGF1/PER2/TGFB1/PYGM/EGF/ENPP1	9
GO:0048639	GO:0048639	positive regulation of developmental growth	13/724	187/18866	0.0285079	0.319211	0.293006	EDN1/FGFR1/FGFR2/IGF1/PLAA/RNF157/SEMA4D/SYT1/TGFBR3/TNFRSF12A/TRPC5/BDNF/VEGFA	13
GO:0061138	GO:0061138	morphogenesis of a branching epithelium	13/724	187/18866	0.0285079	0.319211	0.293006	DLG5/EDN1/EPHA2/ESR1/FGFR1/FGFR2/SOCS3/FAT4/GLI3/HNF1B/PBX1/VEGFA/EGF	13
GO:0014074	GO:0014074	response to purine-containing compound	11/724	149/18866	0.0287106	0.320309	0.294014	AKAP9/AQP9/DGKQ/DMTN/FOSB/P2RY2/PANX1/PER1/PNPT1/PTK2B/RYR3	11
GO:0007389	GO:0007389	pattern specification process	26/724	455/18866	0.0287687	0.320309	0.294014	ADGRG1/CHRD/CITED2/CRB2/CRKL/DAAM2/DISP1/DPCD/DYNC2H1/EDN1/FGFR1/FGFR2/HES6/HOXA9/PBX2/SNAI1/TBX19/TBX6/TDGF1/TMEM107/WDR77/ZEB1/BMPR1B/GLI3/HNF1B/PBX1	26
GO:0033619	GO:0033619	membrane protein proteolysis	6/724	61/18866	0.0290995	0.320309	0.294014	ADAM8/GPLD1/PRKCQ/TGFB1/TIMP3/TIMP4	6
GO:0046888	GO:0046888	negative regulation of hormone secretion	6/724	61/18866	0.0290995	0.320309	0.294014	EDN1/INHBA/MIDN/ADORA1/FFAR4/SYTL4	6
GO:0051310	GO:0051310	metaphase plate congression	6/724	61/18866	0.0290995	0.320309	0.294014	CDCA8/FAM83D/KIF14/KPNB1/NDC80/GEM	6
GO:1902041	GO:1902041	regulation of extrinsic apoptotic signaling pathway via death domain receptors	6/724	61/18866	0.0290995	0.320309	0.294014	SKIL/TIMP3/TNFAIP3/TRADD/BMPR1B/SCRT2	6
GO:0030336	GO:0030336	negative regulation of cell migration	21/724	350/18866	0.0295009	0.320309	0.294014	ADGRG1/CHRD/CITED2/DLG5/DPP4/FOXO3/GADD45A/MIR101-1/MITF/PADI2/PRKG1/PTN/PTPRM/TGFB1/ADORA1/CARD10/EMILIN1/MAPK15/PIP5KL1/STAP1/NAV3	21
GO:0045667	GO:0045667	regulation of osteoblast differentiation	10/724	131/18866	0.0295056	0.320309	0.294014	CHRD/FGFR2/IGF1/LTF/RUNX2/SEMA4D/TMEM119/BMPR1B/FFAR4/GLI3	10
GO:0048814	GO:0048814	regulation of dendrite morphogenesis	8/724	95/18866	0.0295488	0.320309	0.294014	CDK5/CUX1/PPP1R9A/SEMA4D/SIPA1L1/TRPC5/TRPC6/SHANK3	8
GO:1903725	GO:1903725	regulation of phospholipid metabolic process	8/724	95/18866	0.0295488	0.320309	0.294014	CD19/KIT/NOD2/PIK3R6/PTK2B/RAB38/SOCS3/TGFB1	8
GO:0010644	GO:0010644	cell communication by electrical coupling	4/724	31/18866	0.0297435	0.320309	0.294014	CAV1/GJB6/PKP2/ANK3	4
GO:0060261	GO:0060261	positive regulation of transcription initiation from RNA polymerase II promoter	4/724	31/18866	0.0297435	0.320309	0.294014	ESR1/MED30/MED4/HNF1B	4
GO:0060292	GO:0060292	long-term synaptic depression	4/724	31/18866	0.0297435	0.320309	0.294014	PPP1R9A/PTK2B/ADORA1/SHANK3	4
GO:1900181	GO:1900181	negative regulation of protein localization to nucleus	4/724	31/18866	0.0297435	0.320309	0.294014	ANGPT1/MFHAS1/DCLK2/PKIA	4
GO:1902624	GO:1902624	positive regulation of neutrophil migration	4/724	31/18866	0.0297435	0.320309	0.294014	ADAM8/CXCL8/DAPK2/EDN1	4
GO:0072511	GO:0072511	divalent inorganic cation transport	27/724	478/18866	0.0297607	0.320309	0.294014	BAK1/CAV1/CD19/CDH23/CDK5/GRIN2D/GRIN3A/OPRL1/PANX1/PTK2B/RAMP1/SLC24A3/SLC8A2/TRPC5/TRPC6/ANXA9/ATP2A1/CACHD1/MCOLN3/NOS1AP/SLC24A4/TRPM3/TRPM6/EGF/GEM/RYR3/TCN1	27
GO:1903555	GO:1903555	regulation of tumor necrosis factor superfamily cytokine production	9/724	113/18866	0.0298669	0.320309	0.294014	ADAM8/ANGPT1/BPI/IGF1/LTF/NOD2/TICAM1/TNFAIP3/CD34	9
GO:0010832	GO:0010832	negative regulation of myotube differentiation	3/724	18/18866	0.0298759	0.320309	0.294014	TMEM119/TRIM72/BDNF	3
GO:0032740	GO:0032740	positive regulation of interleukin-17 production	3/724	18/18866	0.0298759	0.320309	0.294014	NOD2/PRKCQ/TGFB1	3
GO:0000271	GO:0000271	polysaccharide biosynthetic process	7/724	78/18866	0.0299681	0.320309	0.294014	B4GALT5/GBE1/IGF1/PER2/TGFB1/EGF/ENPP1	7
GO:0051057	GO:0051057	positive regulation of small GTPase mediated signal transduction	7/724	78/18866	0.0299681	0.320309	0.294014	ADGRG1/ARHGEF3/CRKL/GPR174/IGF1/NTRK1/SOS2	7
GO:0071222	GO:0071222	cellular response to lipopolysaccharide	14/724	208/18866	0.0300589	0.320585	0.294268	BPI/CTSG/CXCL8/DEFA3/DEFA4/HCK/LTF/NOD2/PDCD1LG2/PLAA/TGFB1/TICAM1/TNFAIP3/STAP1	14
GO:0007369	GO:0007369	gastrulation	13/724	189/18866	0.0307169	0.323111	0.296587	CHRD/COL6A1/CRB2/EPHA2/FGFR1/FGFR2/INHBA/SNAI1/TBX19/TBX6/COL8A1/HNF1B/TENM4	13
GO:0043534	GO:0043534	blood vessel endothelial cell migration	13/724	189/18866	0.0307169	0.323111	0.296587	ANGPT1/EGR3/EPHA2/FGFR1/GADD45A/GATA2/GPLD1/MIR101-1/PTK2B/TDGF1/TGFB1/CARD10/VEGFA	13
GO:0032692	GO:0032692	negative regulation of interleukin-1 production	5/724	46/18866	0.0307658	0.323111	0.296587	IGF1/MEFV/MIR101-1/TNFAIP3/FFAR4	5
GO:2000142	GO:2000142	regulation of DNA-templated transcription, initiation	5/724	46/18866	0.0307658	0.323111	0.296587	ESR1/MED30/MED4/MITF/HNF1B	5
GO:0010595	GO:0010595	positive regulation of endothelial cell migration	10/724	132/18866	0.0308739	0.323111	0.296587	ANGPT1/EDN1/FGFR1/GATA2/GPLD1/MIR101-1/PTK2B/TDGF1/TGFB1/VEGFA	10
GO:0090596	GO:0090596	sensory organ morphogenesis	17/724	269/18866	0.0308971	0.323111	0.296587	BAK1/COL8A2/EDN1/EPHA2/FGFR1/FGFR2/GATA2/GJB6/PTN/PTPRM/TFAP2A/TPRN/ZEB1/BDNF/COL8A1/GLI3/VEGFA	17
GO:0048880	GO:0048880	sensory system development	23/724	394/18866	0.0309403	0.323111	0.296587	ACHE/ARHGAP35/B9D1/BAK1/COL8A2/CRYAB/EPHA2/INHBA/MITF/PBX2/PBX4/PPP1R13L/PTN/PTPRM/SKIL/TFAP2A/ZEB1/BDNF/BMPR1B/COL8A1/GLI3/PBX1/VEGFA	23
GO:2000241	GO:2000241	regulation of reproductive process	12/724	170/18866	0.0311418	0.323111	0.296587	CITED2/ESR1/HORMAD1/IGF1/INHBA/PTGDR2/SNAI1/TRIP13/WDR77/MAPK15/VEGFA/CCDC87	12
GO:0035249	GO:0035249	synaptic transmission, glutamatergic	8/724	96/18866	0.0311962	0.323111	0.296587	CDK5/NTRK1/PTK2B/SYT1/UNC13B/ADORA1/CNIH3/SHANK3	8
GO:0002260	GO:0002260	lymphocyte homeostasis	6/724	62/18866	0.0312118	0.323111	0.296587	BAK1/GPR174/SIT1/SKIL/TNFAIP3/RAG1	6
GO:0007405	GO:0007405	neuroblast proliferation	6/724	62/18866	0.0312118	0.323111	0.296587	FGFR1/FGFR2/PTN/BDNF/GLI3/VEGFA	6
GO:0010518	GO:0010518	positive regulation of phospholipase activity	6/724	62/18866	0.0312118	0.323111	0.296587	ESR1/FGFR1/FGFR2/KIT/PLAA/BDNF	6
GO:0055025	GO:0055025	positive regulation of cardiac muscle tissue development	6/724	62/18866	0.0312118	0.323111	0.296587	EDN1/FGFR1/FGFR2/IGF1/TGFB1/TGFBR3	6
GO:2000351	GO:2000351	regulation of endothelial cell apoptotic process	6/724	62/18866	0.0312118	0.323111	0.296587	ANGPT1/FOXO3/GATA2/MIR101-1/TNFAIP3/CD160	6
GO:0030198	GO:0030198	extracellular matrix organization	23/724	395/18866	0.0317154	0.327524	0.300637	ADAM8/ADAMTS3/BMP1/CAV1/COL6A1/COL6A2/COL8A2/CRTAP/CTSG/DPP4/ITGA2B/ITGB7/PLG/QSOX1/TGFB1/ADAMTS10/COL4A4/COL8A1/ELANE/EMILIN1/GAS2/MMP16/ADAMTS15	23
GO:0099601	GO:0099601	regulation of neurotransmitter receptor activity	7/724	79/18866	0.0318371	0.327524	0.300637	AKAP9/CDK5/DLG4/PTK2B/SLC6A9/CNIH3/SHANK3	7
GO:0120192	GO:0120192	tight junction assembly	7/724	79/18866	0.0318371	0.327524	0.300637	CLDN20/EPHA2/ESAM/MARVELD2/PRKCH/RAB13/SNAI1	7
GO:0048638	GO:0048638	regulation of developmental growth	21/724	353/18866	0.0319332	0.327829	0.300917	CDK5/CDKN1A/EDN1/FGFR1/FGFR2/FTO/IGF1/MAP2/MAPK11/NRCAM/PLAA/RNF157/SEMA4D/SEMA6B/SYT1/TGFBR3/TNFRSF12A/TRPC5/BDNF/HNF1B/VEGFA	21
GO:0032409	GO:0032409	regulation of transporter activity	18/724	291/18866	0.0323204	0.330306	0.303191	ABCB1/AKAP9/CAV1/CDK5/DLG4/OPRL1/PCSK9/PTK2B/SLC6A9/TRPC6/WNK2/ANK3/ATP2A1/CNIH3/NOS1AP/SYNGR3/GEM/SHANK3	18
GO:0030307	GO:0030307	positive regulation of cell growth	12/724	171/18866	0.0323751	0.330306	0.303191	EDN1/IGF1/PLAA/PTK2B/RNF157/SEMA4D/SUPV3L1/SYT1/TNFRSF12A/TRPC5/BDNF/VEGFA	12
GO:0051302	GO:0051302	regulation of cell division	12/724	171/18866	0.0323751	0.330306	0.303191	AHCTF1/E2F7/FGFR2/KIF14/MACC1/MAP10/ORC6/PDGFC/PTN/TGFB1/AURKC/VEGFA	12
GO:0043062	GO:0043062	extracellular structure organization	23/724	396/18866	0.032505	0.330948	0.30378	ADAM8/ADAMTS3/BMP1/CAV1/COL6A1/COL6A2/COL8A2/CRTAP/CTSG/DPP4/ITGA2B/ITGB7/PLG/QSOX1/TGFB1/ADAMTS10/COL4A4/COL8A1/ELANE/EMILIN1/GAS2/MMP16/ADAMTS15	23
GO:0030516	GO:0030516	regulation of axon extension	8/724	97/18866	0.0329055	0.331142	0.303958	CDK5/MAP2/NRCAM/SEMA4D/SEMA6B/TNFRSF12A/TRPC5/VEGFA	8
GO:0032651	GO:0032651	regulation of interleukin-1 beta production	8/724	97/18866	0.0329055	0.331142	0.303958	IGF1/MEFV/MIR101-1/NOD2/PANX1/S1PR3/TNFAIP3/FFAR4	8
GO:0120162	GO:0120162	positive regulation of cold-induced thermogenesis	8/724	97/18866	0.0329055	0.331142	0.303958	ACHE/CAV1/PDGFC/PER2/PTH2R/FFAR4/VEGFA/ELOVL6	8
GO:0003176	GO:0003176	aortic valve development	4/724	32/18866	0.0329935	0.331142	0.303958	NFATC1/SNAI1/TGFB1/EMILIN1	4
GO:0051385	GO:0051385	response to mineralocorticoid	4/724	32/18866	0.0329935	0.331142	0.303958	CDKN1A/EDN1/FOSB/FOXO3	4
GO:0061036	GO:0061036	positive regulation of cartilage development	4/724	32/18866	0.0329935	0.331142	0.303958	BMP1/RUNX2/BMPR1B/GLI3	4
GO:0070528	GO:0070528	protein kinase C signaling	4/724	32/18866	0.0329935	0.331142	0.303958	ADGRG1/AKAP12/DGKQ/VEGFA	4
GO:0042493	GO:0042493	response to drug	23/724	397/18866	0.0333094	0.331681	0.304453	ABCB1/BAD/BAK1/CDKN1A/CRKL/CTPS1/EDN1/FOSB/FOXO3/GPLD1/INHBA/KCNH2/NTRK1/PTK2B/PTN/PTPRM/SORD/UCHL1/ACER2/BDNF/HNF1B/SLC22A1/TIMP4	23
GO:0030225	GO:0030225	macrophage differentiation	5/724	47/18866	0.0333807	0.331681	0.304453	GATA2/INHBA/TGFB1/TSPAN2/VEGFA	5
GO:0045933	GO:0045933	positive regulation of muscle contraction	5/724	47/18866	0.0333807	0.331681	0.304453	EDN1/KIT/SPX/ATP2A1/NOS1AP	5
GO:0001649	GO:0001649	osteoblast differentiation	15/724	231/18866	0.0333831	0.331681	0.304453	ACHE/CHRD/COL6A1/EPHA2/FGFR2/IGF1/LTF/MRC2/RUNX2/SEMA4D/SNAI1/TMEM119/BMPR1B/FFAR4/GLI3	15
GO:0032271	GO:0032271	regulation of protein polymerization	15/724	231/18866	0.0333831	0.331681	0.304453	AKAP9/DMTN/EML2/ESAM/HCK/MAP2/NCKAP1/PPP1R9A/PTK2B/RASA1/SLAIN2/TMOD2/WHAMM/TENM1/NAV3	15
GO:0006022	GO:0006022	aminoglycan metabolic process	12/724	172/18866	0.033643	0.332259	0.304983	ANGPT1/B4GALT4/B4GALT5/CHIT1/PGLYRP1/SLC10A7/ST3GAL3/ST3GAL4/TGFB1/XYLT2/DSEL/EGF	12
GO:0050714	GO:0050714	positive regulation of protein secretion	12/724	172/18866	0.033643	0.332259	0.304983	ACHE/ADAM8/BAD/GPLD1/HCAR2/IGF1/PANX1/TGFB1/UNC13B/CD34/CLEC4E/SYTL4	12
GO:1990138	GO:1990138	neuron projection extension	12/724	172/18866	0.033643	0.332259	0.304983	CDK5/MAP2/NRCAM/PLAA/RNF157/SEMA4D/SEMA6B/SYT1/TNFRSF12A/TRPC5/BDNF/VEGFA	12
GO:0030011	GO:0030011	maintenance of cell polarity	3/724	19/18866	0.0344914	0.333706	0.306312	CRB2/DLG5/LIN7A	3
GO:0032674	GO:0032674	regulation of interleukin-5 production	3/724	19/18866	0.0344914	0.333706	0.306312	EPX/IL1RL1/IL5RA	3
GO:0035269	GO:0035269	protein O-linked mannosylation	3/724	19/18866	0.0344914	0.333706	0.306312	FKRP/SDF2/SDF2L1	3
GO:0035338	GO:0035338	long-chain fatty-acyl-CoA biosynthetic process	3/724	19/18866	0.0344914	0.333706	0.306312	ELOVL7/HACD1/ELOVL6	3
GO:0035988	GO:0035988	chondrocyte proliferation	3/724	19/18866	0.0344914	0.333706	0.306312	LTF/BMPR1B/MMP16	3
GO:0046629	GO:0046629	gamma-delta T cell activation	3/724	19/18866	0.0344914	0.333706	0.306312	EGR3/NOD2/TCF7	3
GO:0060602	GO:0060602	branch elongation of an epithelium	3/724	19/18866	0.0344914	0.333706	0.306312	ESR1/FGFR2/HNF1B	3
GO:0098911	GO:0098911	regulation of ventricular cardiac muscle cell action potential	3/724	19/18866	0.0344914	0.333706	0.306312	CAV1/PKP2/NOS1AP	3
GO:2000251	GO:2000251	positive regulation of actin cytoskeleton reorganization	3/724	19/18866	0.0344914	0.333706	0.306312	CDK5/HCK/STAP1	3
GO:0002683	GO:0002683	negative regulation of immune system process	26/724	463/18866	0.0345294	0.333706	0.306312	BPI/CLNK/DLG5/DPP4/GATA2/HFE/HLA-DOB/HOXA9/IL1RL1/INHBA/LRRC17/LTF/PADI2/PDCD1LG2/PGLYRP1/PTK2B/TGFB1/TMEM176A/TNFAIP3/TSPAN6/ADORA1/CD160/EMILIN1/GLI3/STAP1/VTCN1	26
GO:1903828	GO:1903828	negative regulation of cellular protein localization	9/724	116/18866	0.034533	0.333706	0.306312	ANGPT1/CDK5/DMTN/LMAN1/MFHAS1/TGFB1/DCLK2/LYPD1/PKIA	9
GO:0010771	GO:0010771	negative regulation of cell morphogenesis involved in differentiation	8/724	98/18866	0.0346774	0.334447	0.306992	CDK5/DMTN/MAP2/SEMA4D/SEMA6B/TRAK2/TRPC5/TRPC6	8
GO:0048565	GO:0048565	digestive tract development	10/724	135/18866	0.0352463	0.339272	0.31142	CDKN1A/CRKL/CXCL8/FGFR2/KIT/PDGFC/TCF7/FAT4/GLI3/HNF1B	10
GO:0071248	GO:0071248	cellular response to metal ion	13/724	193/18866	0.0355027	0.341075	0.313075	DLG4/DMTN/EDN1/FOSB/GPLD1/HFE/MTF1/SYT1/SYT15/TFAP2A/ANK3/MT1F/RYR3	13
GO:0007188	GO:0007188	adenylate cyclase-modulating G protein-coupled receptor signaling pathway	15/724	233/18866	0.0356091	0.341433	0.313404	ADGRE3/ADGRG1/ADGRG5/ADGRL2/AKAP12/EDN1/OPRL1/PTGDR2/PTH2R/RAMP1/S1PR3/ADGRL3/ADORA1/GPR176/PTGER2	15
GO:0031952	GO:0031952	regulation of protein autophosphorylation	5/724	48/18866	0.0361297	0.341467	0.313436	CAV1/PDGFC/PPP2R5B/VEGFA/ENPP1	5
GO:0048701	GO:0048701	embryonic cranial skeleton morphogenesis	5/724	48/18866	0.0361297	0.341467	0.313436	FGFR2/RUNX2/TFAP2A/GLI3/MMP16	5
GO:0055010	GO:0055010	ventricular cardiac muscle tissue morphogenesis	5/724	48/18866	0.0361297	0.341467	0.313436	FGFR2/PKP2/TGFB1/TGFBR3/TNNC1	5
GO:0055023	GO:0055023	positive regulation of cardiac muscle tissue growth	5/724	48/18866	0.0361297	0.341467	0.313436	EDN1/FGFR1/FGFR2/IGF1/TGFBR3	5
GO:1900271	GO:1900271	regulation of long-term synaptic potentiation	5/724	48/18866	0.0361297	0.341467	0.313436	NRGN/PPP1R9A/PTN/ADORA1/SHANK3	5
GO:0018107	GO:0018107	peptidyl-threonine phosphorylation	9/724	117/18866	0.0361939	0.341467	0.313436	CDC42BPG/CDK5/DDIT4/DGKQ/DMTN/TGFB1/TRPC5/TRPC6/EGF	9
GO:0050768	GO:0050768	negative regulation of neurogenesis	18/724	295/18866	0.0362229	0.341467	0.313436	ADGRG1/CDK5/DAAM2/FOXO3/MAP2/PMP22/PTN/SEMA4D/SEMA6B/SPOCK1/TBX6/TRAK2/TRPC5/TRPC6/BDNF/GLI3/PBX1/STAP1	18
GO:0045926	GO:0045926	negative regulation of growth	16/724	254/18866	0.0363986	0.341467	0.313436	CDA/CDK5/CDKN1A/CRYAB/INHBA/MAP2/MAPK11/PNPT1/RBBP7/SEMA4D/SEMA6B/TGFB1/TMPRSS4/MT1F/NPPB/ENPP1	16
GO:0009954	GO:0009954	proximal/distal pattern formation	4/724	33/18866	0.0364425	0.341467	0.313436	HOXA9/PBX2/GLI3/PBX1	4
GO:0042339	GO:0042339	keratan sulfate metabolic process	4/724	33/18866	0.0364425	0.341467	0.313436	B4GALT4/B4GALT5/ST3GAL3/ST3GAL4	4
GO:0046627	GO:0046627	negative regulation of insulin receptor signaling pathway	4/724	33/18866	0.0364425	0.341467	0.313436	PRKCQ/SOCS3/TRIM72/ENPP1	4
GO:0090022	GO:0090022	regulation of neutrophil chemotaxis	4/724	33/18866	0.0364425	0.341467	0.313436	CXCL8/DAPK2/DPP4/EDN1	4
GO:0048754	GO:0048754	branching morphogenesis of an epithelial tube	11/724	155/18866	0.0367605	0.343154	0.314984	DLG5/EDN1/EPHA2/ESR1/FGFR2/FAT4/GLI3/HNF1B/PBX1/VEGFA/EGF	11
GO:0097305	GO:0097305	response to alcohol	15/724	234/18866	0.0367616	0.343154	0.314984	BAD/BAK1/CDKN1A/FGFR2/FOSB/FOXO3/GPLD1/GRIN3A/INHBA/KCNMB1/PTK2B/TGFB1/TGFBR3/HPGD/PTGER2	15
GO:0001666	GO:0001666	response to hypoxia	21/724	359/18866	0.0372445	0.347006	0.31852	ADAM8/BAD/CAV1/CITED2/CRYAB/DDIT4/DPP4/EDN1/FOXO3/KCNMB1/LONP1/MPL/MYB/PTK2B/PTN/SLC2A1/TGFBR3/TRPC6/ADORA1/CD34/VEGFA	21
GO:0120193	GO:0120193	tight junction organization	7/724	82/18866	0.0379066	0.349965	0.321236	CLDN20/EPHA2/ESAM/MARVELD2/PRKCH/RAB13/SNAI1	7
GO:0021987	GO:0021987	cerebral cortex development	9/724	118/18866	0.0379088	0.349965	0.321236	ADGRG1/BAD/CDK5/CRKL/KIF14/SLC2A1/TACC2/FAT4/GLI3	9
GO:0022898	GO:0022898	regulation of transmembrane transporter activity	17/724	276/18866	0.0380154	0.349965	0.321236	ABCB1/AKAP9/CAV1/CDK5/DLG4/OPRL1/PCSK9/PTK2B/SLC6A9/TRPC6/WNK2/ANK3/ATP2A1/CNIH3/NOS1AP/GEM/SHANK3	17
GO:0007219	GO:0007219	Notch signaling pathway	13/724	195/18866	0.0380858	0.349965	0.321236	CHAC1/GATA2/KIT/MIB2/NOD2/S1PR3/SNAI1/FAT4/GAS2/HNF1B/PBX1/TIMP4/EGF	13
GO:0006940	GO:0006940	regulation of smooth muscle contraction	6/724	65/18866	0.0381392	0.349965	0.321236	CAV1/EDN1/KIT/PRKG1/SPX/ADORA1	6
GO:0031646	GO:0031646	positive regulation of nervous system process	6/724	65/18866	0.0381392	0.349965	0.321236	DLG4/OPRL1/PTK2B/UNC13B/SHANK3/TENM4	6
GO:0060675	GO:0060675	ureteric bud morphogenesis	6/724	65/18866	0.0381392	0.349965	0.321236	KIF26B/FAT4/GLI3/HNF1B/PBX1/VEGFA	6
GO:0006865	GO:0006865	amino acid transport	11/724	156/18866	0.0382416	0.349965	0.321236	PER2/SFXN1/SLC16A2/SLC25A22/SLC6A9/SYT1/UNC13B/ADORA1/BDNF/OCA2/SLC1A1	11
GO:0048592	GO:0048592	eye morphogenesis	11/724	156/18866	0.0382416	0.349965	0.321236	BAK1/COL8A2/EPHA2/PTN/PTPRM/TFAP2A/ZEB1/BDNF/COL8A1/GLI3/VEGFA	11
GO:0019730	GO:0019730	antimicrobial humoral response	10/724	137/18866	0.0383901	0.349965	0.321236	BPI/CAMP/CTSG/CXCL8/DEFA3/DEFA4/LTF/PGLYRP1/S100A12/ELANE	10
GO:0030219	GO:0030219	megakaryocyte differentiation	8/724	100/18866	0.0384125	0.349965	0.321236	CDKN2B/GATA1/GATA2/GP1BA/ITGA2B/KIT/PRKCQ/NFE2	8
GO:0045807	GO:0045807	positive regulation of endocytosis	8/724	100/18866	0.0384125	0.349965	0.321236	ANGPT1/GATA2/HFE/PCSK9/PPP3CC/STAP1/VEGFA/EGF	8
GO:0002686	GO:0002686	negative regulation of leukocyte migration	5/724	49/18866	0.0390141	0.350392	0.321628	DPP4/PADI2/ADORA1/EMILIN1/STAP1	5
GO:0015872	GO:0015872	dopamine transport	5/724	49/18866	0.0390141	0.350392	0.321628	SYT1/SYT15/MAPK15/SLC18A2/SLC22A1	5
GO:0002577	GO:0002577	regulation of antigen processing and presentation	3/724	20/18866	0.0394525	0.350392	0.321628	HFE/HLA-DOB/NOD2	3
GO:0002689	GO:0002689	negative regulation of leukocyte chemotaxis	3/724	20/18866	0.0394525	0.350392	0.321628	DPP4/PADI2/STAP1	3
GO:0032332	GO:0032332	positive regulation of chondrocyte differentiation	3/724	20/18866	0.0394525	0.350392	0.321628	RUNX2/BMPR1B/GLI3	3
GO:0032634	GO:0032634	interleukin-5 production	3/724	20/18866	0.0394525	0.350392	0.321628	EPX/IL1RL1/IL5RA	3
GO:0034138	GO:0034138	toll-like receptor 3 signaling pathway	3/724	20/18866	0.0394525	0.350392	0.321628	CAV1/TICAM1/TNFAIP3	3
GO:0036303	GO:0036303	lymph vessel morphogenesis	3/724	20/18866	0.0394525	0.350392	0.321628	EPHA2/LGALS12/VEGFA	3
GO:0051412	GO:0051412	response to corticosterone	3/724	20/18866	0.0394525	0.350392	0.321628	CDKN1A/FOSB/FOXO3	3
GO:0051767	GO:0051767	nitric-oxide synthase biosynthetic process	3/724	20/18866	0.0394525	0.350392	0.321628	AKAP12/EDN1/NOD2	3
GO:0051769	GO:0051769	regulation of nitric-oxide synthase biosynthetic process	3/724	20/18866	0.0394525	0.350392	0.321628	AKAP12/EDN1/NOD2	3
GO:0060353	GO:0060353	regulation of cell adhesion molecule production	3/724	20/18866	0.0394525	0.350392	0.321628	CAV1/CXCL8/MIR101-1	3
GO:0097503	GO:0097503	sialylation	3/724	20/18866	0.0394525	0.350392	0.321628	ST3GAL3/ST3GAL4/ST6GALNAC2	3
GO:0071706	GO:0071706	tumor necrosis factor superfamily cytokine production	9/724	119/18866	0.0396781	0.350392	0.321628	ADAM8/ANGPT1/BPI/IGF1/LTF/NOD2/TICAM1/TNFAIP3/CD34	9
GO:0010770	GO:0010770	positive regulation of cell morphogenesis involved in differentiation	11/724	157/18866	0.0397638	0.350392	0.321628	CRKL/CUX1/DMTN/MPL/PLXNC1/SEMA4D/SKIL/TNFRSF12A/TRPC5/BDNF/VEGFA	11
GO:0043271	GO:0043271	negative regulation of ion transport	11/724	157/18866	0.0397638	0.350392	0.321628	CAV1/KCNH2/OPRL1/PCSK9/PTK2B/PXK/SLC6A9/WNK2/ADORA1/ANK3/GEM	11
GO:0098739	GO:0098739	import across plasma membrane	11/724	157/18866	0.0397638	0.350392	0.321628	HFE/KCNH2/PER2/SLC12A1/SLC16A2/SLC2A1/SLC6A9/SLC8A2/WNK2/SLC1A1/KCNJ16	11
GO:0031334	GO:0031334	positive regulation of protein-containing complex assembly	16/724	257/18866	0.039829	0.350392	0.321628	AKAP9/BAK1/ESR1/HCK/NCKAP1/PPP2R5B/PTK2B/SLAIN2/TGFB1/UNC13B/WHAMM/HRK/TENM1/VEGFA/BIK/NAV3	16
GO:0001570	GO:0001570	vasculogenesis	7/724	83/18866	0.0400872	0.350392	0.321628	CAV1/EPHA2/RASA1/TGFB1/TGFBR3/CD34/VEGFA	7
GO:0071277	GO:0071277	cellular response to calcium ion	7/724	83/18866	0.0400872	0.350392	0.321628	DMTN/EDN1/FOSB/GPLD1/SYT1/SYT15/RYR3	7
GO:0033198	GO:0033198	response to ATP	4/724	34/18866	0.0400915	0.350392	0.321628	DGKQ/P2RY2/PANX1/RYR3	4
GO:0045648	GO:0045648	positive regulation of erythrocyte differentiation	4/724	34/18866	0.0400915	0.350392	0.321628	FOXO3/GATA1/GATA2/INHBA	4
GO:1902692	GO:1902692	regulation of neuroblast proliferation	4/724	34/18866	0.0400915	0.350392	0.321628	PTN/BDNF/GLI3/VEGFA	4
GO:0032970	GO:0032970	regulation of actin filament-based process	23/724	405/18866	0.0402921	0.351524	0.322667	AKAP9/ARHGAP35/CAV1/CDK5/DMTN/EDN1/ESAM/HCK/NCKAP1/PKP2/PPP1R9A/PTK2B/RASA1/RHOH/TMOD2/TNNC1/WHAMM/ADORA1/ATP2A1/NOS1AP/STAP1/TENM1/SHANK3	23
GO:0001708	GO:0001708	cell fate specification	8/724	101/18866	0.0403773	0.351646	0.322778	FGFR1/LMO4/MGA/TBX19/TBX6/GLI3/HNF1B/TENM4	8
GO:0050922	GO:0050922	negative regulation of chemotaxis	6/724	66/18866	0.040649	0.352149	0.32324	DPP4/PADI2/SEMA4D/SEMA6B/ELANE/STAP1	6
GO:0072171	GO:0072171	mesonephric tubule morphogenesis	6/724	66/18866	0.040649	0.352149	0.32324	KIF26B/FAT4/GLI3/HNF1B/PBX1/VEGFA	6
GO:2000378	GO:2000378	negative regulation of reactive oxygen species metabolic process	6/724	66/18866	0.040649	0.352149	0.32324	CAV1/CRYAB/HP/TFAP2A/CD34/SLC18A2	6
GO:0071559	GO:0071559	response to transforming growth factor beta	16/724	258/18866	0.0410225	0.354762	0.325639	BAMBI/CAV1/CDKN2B/CITED2/CRKL/EDN1/FGFR2/SKIL/TGFB1/TGFBR3/ZEB1/EID2/EMILIN1/HPGD/HTRA4/MXRA5	16
GO:0070838	GO:0070838	divalent metal ion transport	26/724	471/18866	0.0411206	0.354989	0.325847	BAK1/CAV1/CD19/CDH23/CDK5/GRIN2D/GRIN3A/OPRL1/PANX1/PTK2B/RAMP1/SLC24A3/SLC8A2/TRPC5/TRPC6/ANXA9/ATP2A1/CACHD1/MCOLN3/NOS1AP/SLC24A4/TRPM3/TRPM6/EGF/GEM/RYR3	26
GO:0030203	GO:0030203	glycosaminoglycan metabolic process	11/724	158/18866	0.0413275	0.356152	0.326915	ANGPT1/B4GALT4/B4GALT5/PGLYRP1/SLC10A7/ST3GAL3/ST3GAL4/TGFB1/XYLT2/DSEL/EGF	11
GO:0010594	GO:0010594	regulation of endothelial cell migration	15/724	238/18866	0.0416412	0.358231	0.328823	ANGPT1/EDN1/EPHA2/FGFR1/GADD45A/GATA2/GPLD1/MIR101-1/PTK2B/PTN/PTPRM/TDGF1/TGFB1/CARD10/VEGFA	15
GO:0048771	GO:0048771	tissue remodeling	12/724	178/18866	0.0420012	0.359933	0.330385	ADAM8/BAK1/CAV1/EPHA2/MITF/PLG/PTK2B/PTN/TGFB1/TMEM119/TNFAIP3/TPH1	12
GO:0007528	GO:0007528	neuromuscular junction development	5/724	50/18866	0.0420348	0.359933	0.330385	CRKL/PTN/UNC13B/ANK3/SHANK3	5
GO:0071805	GO:0071805	potassium ion transmembrane transport	14/724	218/18866	0.0420578	0.359933	0.330385	AKAP9/CAV1/KCNH2/KCNK13/KCNMB1/SLC12A1/SLC24A3/WNK2/ANK3/KCNQ5/NOS1AP/SLC24A4/KCNJ16/KCNS3	14
GO:0007517	GO:0007517	muscle organ development	23/724	407/18866	0.0421953	0.360257	0.330683	CAV1/CDK5/CRYAB/DISP1/EDN1/EGR3/FGFR1/FGFR2/HIVEP3/IGF1/MAPK11/MSC/MYL6B/PKP2/SMTN/TAGLN/TGFB1/TGFBR3/TNNC1/TRIM72/ACTA1/EID2/SGCE	23
GO:0021537	GO:0021537	telencephalon development	16/724	259/18866	0.0422415	0.360257	0.330683	ADGRG1/BAD/CDK5/CRKL/DPCD/EIF2B5/INHBA/KIF14/NFIB/NRGN/SLC2A1/TACC2/DCLK2/FAT4/GLI3/SHANK3	16
GO:2000146	GO:2000146	negative regulation of cell motility	21/724	365/18866	0.0431826	0.367647	0.337467	ADGRG1/CHRD/CITED2/DLG5/DPP4/FOXO3/GADD45A/MIR101-1/MITF/PADI2/PRKG1/PTN/PTPRM/TGFB1/ADORA1/CARD10/EMILIN1/MAPK15/PIP5KL1/STAP1/NAV3	21
GO:0090068	GO:0090068	positive regulation of cell cycle process	18/724	302/18866	0.0438668	0.36964	0.339295	CDC16/CDKN1A/DTL/E2F7/EDN1/FAM83D/FGFR1/GADD45A/GTSE1/IGF1/KIF14/MAP10/NDC80/PPP2R5B/AURKC/MAPK15/PBX1/EGF	18
GO:0007435	GO:0007435	salivary gland morphogenesis	4/724	35/18866	0.0439405	0.36964	0.339295	FGFR1/FGFR2/NFIB/TGFB1	4
GO:0016486	GO:0016486	peptide hormone processing	4/724	35/18866	0.0439405	0.36964	0.339295	CTSG/DISP1/ENPEP/PCSK1	4
GO:0033687	GO:0033687	osteoblast proliferation	4/724	35/18866	0.0439405	0.36964	0.339295	FGFR2/GATA1/LTF/TMEM119	4
GO:0098801	GO:0098801	regulation of renal system process	4/724	35/18866	0.0439405	0.36964	0.339295	EDN1/SPX/ADORA1/NPPB	4
GO:0140448	GO:0140448	signaling receptor ligand precursor processing	4/724	35/18866	0.0439405	0.36964	0.339295	CTSG/DISP1/ENPEP/PCSK1	4
GO:1900077	GO:1900077	negative regulation of cellular response to insulin stimulus	4/724	35/18866	0.0439405	0.36964	0.339295	PRKCQ/SOCS3/TRIM72/ENPP1	4
GO:0008630	GO:0008630	intrinsic apoptotic signaling pathway in response to DNA damage	8/724	103/18866	0.0445048	0.370797	0.340358	BAD/BAK1/CDKN1A/DDIT4/EPHA2/MOAP1/SKIL/SNAI1	8
GO:0048709	GO:0048709	oligodendrocyte differentiation	8/724	103/18866	0.0445048	0.370797	0.340358	B4GALT5/CDK5/DAAM2/EIF2B5/PTN/GLI3/TSPAN2/TENM4	8
GO:1901890	GO:1901890	positive regulation of cell junction assembly	8/724	103/18866	0.0445048	0.370797	0.340358	CAV1/DLG5/EPHA2/NTRK1/SEMA4D/ADGRL3/BDNF/VEGFA	8
GO:0002693	GO:0002693	positive regulation of cellular extravasation	3/724	21/18866	0.044754	0.370797	0.340358	ADAM8/SELP/ELANE	3
GO:0010801	GO:0010801	negative regulation of peptidyl-threonine phosphorylation	3/724	21/18866	0.044754	0.370797	0.340358	DDIT4/DGKQ/DMTN	3
GO:0030220	GO:0030220	platelet formation	3/724	21/18866	0.044754	0.370797	0.340358	CLEC1B/GATA1/MPL	3
GO:0030502	GO:0030502	negative regulation of bone mineralization	3/724	21/18866	0.044754	0.370797	0.340358	GATA1/PTK2B/ENPP1	3
GO:0046823	GO:0046823	negative regulation of nucleocytoplasmic transport	3/724	21/18866	0.044754	0.370797	0.340358	ANGPT1/CDK5/PKIA	3
GO:0090330	GO:0090330	regulation of platelet aggregation	3/724	21/18866	0.044754	0.370797	0.340358	DMTN/PRKCQ/PRKG1	3
GO:0021879	GO:0021879	forebrain neuron differentiation	5/724	51/18866	0.0451927	0.372379	0.34181	FGFR2/GATA2/INHBA/DCLK2/SHANK3	5
GO:0031113	GO:0031113	regulation of microtubule polymerization	5/724	51/18866	0.0451927	0.372379	0.34181	AKAP9/EML2/MAP2/SLAIN2/NAV3	5
GO:0048146	GO:0048146	positive regulation of fibroblast proliferation	5/724	51/18866	0.0451927	0.372379	0.34181	CDKN1A/ESR1/IGF1/MYB/PDGFC	5
GO:0001889	GO:0001889	liver development	10/724	141/18866	0.0452465	0.372379	0.34181	CITED2/E2F7/HFE/PCSK9/PNPT1/PTN/TGFBR3/TNFAIP3/GLI3/HNF1B	10
GO:0045428	GO:0045428	regulation of nitric oxide biosynthetic process	6/724	68/18866	0.0459755	0.376632	0.345714	CAV1/EDN1/PTK2B/TICAM1/CD34/NOS1AP	6
GO:0072577	GO:0072577	endothelial cell apoptotic process	6/724	68/18866	0.0459755	0.376632	0.345714	ANGPT1/FOXO3/GATA2/MIR101-1/TNFAIP3/CD160	6
GO:0050851	GO:0050851	antigen receptor-mediated signaling pathway	19/724	325/18866	0.0460684	0.376632	0.345714	BTN3A3/BTNL8/CD19/CD226/CRKL/EIF2B5/GCSAML/HLA-DQB2/PLEKHA1/PRKCH/PRKCQ/TESPA1/TRAT1/BMX/BTNL9/CD160/STAP1/VTCN1/HLA-DQA1	19
GO:0070371	GO:0070371	ERK1 and ERK2 cascade	19/724	325/18866	0.0460684	0.376632	0.345714	AKAP12/ANGPT1/ARHGAP8/CRKL/EPHA2/FAM83D/FGFR2/IGF1/MFHAS1/NOD2/NTRK1/PDGFC/PTK2B/TGFB1/TIMP3/WNK2/EMILIN1/FFAR4/EGF	19
GO:0071241	GO:0071241	cellular response to inorganic substance	14/724	221/18866	0.0462385	0.377054	0.346101	BAD/DLG4/DMTN/EDN1/FOSB/GPLD1/HFE/MTF1/SYT1/SYT15/TFAP2A/ANK3/MT1F/RYR3	14
GO:0000070	GO:0000070	mitotic sister chromatid segregation	11/724	161/18866	0.0462728	0.377054	0.346101	CDC16/CDCA8/CENPK/DSCC1/KIF14/KPNB1/MAP10/NDC80/TRIP13/ZWINT/AURKC	11
GO:0002027	GO:0002027	regulation of heart rate	8/724	104/18866	0.0466688	0.378408	0.347344	AKAP9/CAV1/EDN1/KCNH2/PKP2/SPX/NOS1AP/SLC1A1	8
GO:0006637	GO:0006637	acyl-CoA metabolic process	8/724	104/18866	0.0466688	0.378408	0.347344	ACOT7/ACOT8/ACSM1/ACSM3/DBI/ELOVL7/HACD1/ELOVL6	8
GO:0035383	GO:0035383	thioester metabolic process	8/724	104/18866	0.0466688	0.378408	0.347344	ACOT7/ACOT8/ACSM1/ACSM3/DBI/ELOVL7/HACD1/ELOVL6	8
GO:0002687	GO:0002687	positive regulation of leukocyte migration	10/724	142/18866	0.0470821	0.379519	0.348364	ADAM8/CXCL8/DAPK2/EDN1/ITGA2B/PTK2B/PTN/SELP/ELANE/VEGFA	10
GO:0007193	GO:0007193	adenylate cyclase-inhibiting G protein-coupled receptor signaling pathway	7/724	86/18866	0.0471132	0.379519	0.348364	AKAP12/EDN1/OPRL1/PTGDR2/S1PR3/ADORA1/GPR176	7
GO:0009791	GO:0009791	post-embryonic development	7/724	86/18866	0.0471132	0.379519	0.348364	BAK1/FGFR2/PLEKHA1/PPP1R13L/ETNK2/SLC18A2/VEGFA	7
GO:0050772	GO:0050772	positive regulation of axonogenesis	7/724	86/18866	0.0471132	0.379519	0.348364	PLXNC1/SEMA4D/SKIL/TNFRSF12A/TRPC5/BDNF/VEGFA	7
GO:0048675	GO:0048675	axon extension	9/724	123/18866	0.0473132	0.380403	0.349175	CDK5/MAP2/NRCAM/SEMA4D/SEMA6B/TNFRSF12A/TRPC5/BDNF/VEGFA	9
GO:0045637	GO:0045637	regulation of myeloid cell differentiation	16/724	263/18866	0.047377	0.380403	0.349175	FOXO3/GATA1/GATA2/GP1BA/HOXA9/INHBA/ITGA2B/KLF10/LRRC17/LTF/MITF/MPL/PRKCQ/PTK2B/TGFB1/NFE2	16
GO:0071219	GO:0071219	cellular response to molecule of bacterial origin	14/724	222/18866	0.0476946	0.381945	0.350591	BPI/CTSG/CXCL8/DEFA3/DEFA4/HCK/LTF/NOD2/PDCD1LG2/PLAA/TGFB1/TICAM1/TNFAIP3/STAP1	14
GO:0010543	GO:0010543	regulation of platelet activation	4/724	36/18866	0.0479895	0.381945	0.350591	DMTN/PRKCQ/PRKG1/SELP	4
GO:0097484	GO:0097484	dendrite extension	4/724	36/18866	0.0479895	0.381945	0.350591	PLAA/RNF157/SYT1/BDNF	4
GO:1901385	GO:1901385	regulation of voltage-gated calcium channel activity	4/724	36/18866	0.0479895	0.381945	0.350591	CDK5/OPRL1/NOS1AP/GEM	4
GO:0019827	GO:0019827	stem cell population maintenance	11/724	162/18866	0.0480072	0.381945	0.350591	FOXO3/GATA2/KIT/KLF10/MED30/PADI4/PTN/TDGF1/HNF1B/PBX1/TET1	11
GO:0042742	GO:0042742	defense response to bacterium	20/724	348/18866	0.0480332	0.381945	0.350591	BPI/CAMP/CLEC4D/CTSG/DEFA3/DEFA4/EPHA2/EPX/HP/LPO/LTF/NOD2/PGLYRP1/S100A12/SELP/STAB1/UNC13B/CD160/CLEC4E/ELANE	20
GO:0048260	GO:0048260	positive regulation of receptor-mediated endocytosis	5/724	52/18866	0.0484885	0.383098	0.351649	ANGPT1/HFE/PCSK9/VEGFA/EGF	5
GO:0055078	GO:0055078	sodium ion homeostasis	5/724	52/18866	0.0484885	0.383098	0.351649	EDN1/SLC12A1/SPX/ADORA1/NPPB	5
GO:0060421	GO:0060421	positive regulation of heart growth	5/724	52/18866	0.0484885	0.383098	0.351649	EDN1/FGFR1/FGFR2/IGF1/TGFBR3	5
GO:2001258	GO:2001258	negative regulation of cation channel activity	5/724	52/18866	0.0484885	0.383098	0.351649	CAV1/OPRL1/SLC6A9/ANK3/GEM	5
GO:0035296	GO:0035296	regulation of tube diameter	10/724	143/18866	0.0489671	0.385645	0.353987	CAV1/EDN1/KCNMB1/P2RY2/PER2/PRKG1/PTPRM/UTS2B/ADORA1/NPPB	10
GO:0097746	GO:0097746	regulation of blood vessel diameter	10/724	143/18866	0.0489671	0.385645	0.353987	CAV1/EDN1/KCNMB1/P2RY2/PER2/PRKG1/PTPRM/UTS2B/ADORA1/NPPB	10
GO:0002688	GO:0002688	regulation of leukocyte chemotaxis	9/724	124/18866	0.049364	0.388152	0.356288	CXCL8/DAPK2/DPP4/EDN1/PADI2/PTK2B/PTN/STAP1/VEGFA	9
GO:0006790	GO:0006790	sulfur compound metabolic process	21/724	371/18866	0.0497823	0.389394	0.357428	ACOT7/ACOT8/ACSM1/ACSM3/ANGPT1/B4GALT4/B4GALT5/CHAC1/DBI/ELOVL7/HACD1/LPO/MTAP/SLC10A7/ST3GAL3/ST3GAL4/XYLT2/DSEL/GSTO2/ELOVL6/ENPP1	21
GO:0036293	GO:0036293	response to decreased oxygen levels	21/724	371/18866	0.0497823	0.389394	0.357428	ADAM8/BAD/CAV1/CITED2/CRYAB/DDIT4/DPP4/EDN1/FOXO3/KCNMB1/LONP1/MPL/MYB/PTK2B/PTN/SLC2A1/TGFBR3/TRPC6/ADORA1/CD34/VEGFA	21
GO:0033002	GO:0033002	muscle cell proliferation	15/724	244/18866	0.0498002	0.389394	0.357428	ANGPT1/CDKN1A/EDN1/ERN1/FGFR1/FGFR2/IGF1/MAPK11/MYB/PRKG1/TGFBR3/TNFAIP3/ELANE/HPGD/TENM4	15
GO:0120032	GO:0120032	regulation of plasma membrane bounded cell projection assembly	12/724	183/18866	0.0499932	0.389394	0.357428	ARHGAP35/CAV1/DMTN/EPHA2/KIT/NCKAP1/PPP1R9A/TENM2/EPS8L3/MAPK15/STAP1/TENM1	12
GO:0140014	GO:0140014	mitotic nuclear division	17/724	286/18866	0.0501523	0.389394	0.357428	CDC16/CDCA8/CENPK/CEP192/DSCC1/EDN1/IGF1/KIF14/KPNB1/MAP10/MYBL2/NDC80/TRIP13/ZWINT/AURKC/CCDC8/EGF	17
GO:0032402	GO:0032402	melanosome transport	3/724	22/18866	0.0503893	0.389394	0.357428	RAB27A/RAB27B/MREG	3
GO:0035809	GO:0035809	regulation of urine volume	3/724	22/18866	0.0503893	0.389394	0.357428	EDN1/OPRL1/NPPB	3
GO:0036344	GO:0036344	platelet morphogenesis	3/724	22/18866	0.0503893	0.389394	0.357428	CLEC1B/GATA1/MPL	3
GO:0042359	GO:0042359	vitamin D metabolic process	3/724	22/18866	0.0503893	0.389394	0.357428	FGFR1/SNAI1/CYP27A1	3
GO:0060352	GO:0060352	cell adhesion molecule production	3/724	22/18866	0.0503893	0.389394	0.357428	CAV1/CXCL8/MIR101-1	3
GO:0060972	GO:0060972	left/right pattern formation	3/724	22/18866	0.0503893	0.389394	0.357428	CITED2/DPCD/SNAI1	3
GO:0035150	GO:0035150	regulation of tube size	10/724	144/18866	0.050902	0.392128	0.359938	CAV1/EDN1/KCNMB1/P2RY2/PER2/PRKG1/PTPRM/UTS2B/ADORA1/NPPB	10
GO:0061008	GO:0061008	hepaticobiliary system development	10/724	144/18866	0.050902	0.392128	0.359938	CITED2/E2F7/HFE/PCSK9/PNPT1/PTN/TGFBR3/TNFAIP3/GLI3/HNF1B	10
GO:0019233	GO:0019233	sensory perception of pain	8/724	106/18866	0.0512002	0.393198	0.36092	CDK5/EDN1/GRIN2D/NTRK1/OPRL1/SPX/UCHL1/ADORA1	8
GO:0032611	GO:0032611	interleukin-1 beta production	8/724	106/18866	0.0512002	0.393198	0.36092	IGF1/MEFV/MIR101-1/NOD2/PANX1/S1PR3/TNFAIP3/FFAR4	8
GO:0008637	GO:0008637	apoptotic mitochondrial changes	9/724	125/18866	0.0514727	0.393508	0.361204	AIFM2/BAD/BAK1/IGF1/MOAP1/PPP3CC/ATP2A1/HRK/BIK	9
GO:0007416	GO:0007416	synapse assembly	12/724	184/18866	0.051708	0.393508	0.361204	ACHE/CDK5/CRKL/DLG5/NRCAM/NTRK1/PCDH17/PPP1R9A/SEMA4D/ADGRL3/BDNF/SHANK3	12
GO:0043124	GO:0043124	negative regulation of I-kappaB kinase/NF-kappaB signaling	5/724	53/18866	0.0519224	0.393508	0.361204	ESR1/PER1/RHOH/TANK/TNFAIP3	5
GO:0048168	GO:0048168	regulation of neuronal synaptic plasticity	5/724	53/18866	0.0519224	0.393508	0.361204	DLG4/KIT/SLC8A2/UNC13B/SHANK3	5
GO:0070098	GO:0070098	chemokine-mediated signaling pathway	7/724	88/18866	0.0522076	0.393508	0.361204	ACKR2/CCRL2/CXCL8/EDN1/MPL/PADI2/PTK2B	7
GO:0060260	GO:0060260	regulation of transcription initiation from RNA polymerase II promoter	4/724	37/18866	0.0522376	0.393508	0.361204	ESR1/MED30/MED4/HNF1B	4
GO:1905314	GO:1905314	semi-lunar valve development	4/724	37/18866	0.0522376	0.393508	0.361204	NFATC1/SNAI1/TGFB1/EMILIN1	4
GO:2000273	GO:2000273	positive regulation of signaling receptor activity	4/724	37/18866	0.0522376	0.393508	0.361204	HFE/ADORA1/EGF/SHANK3	4
GO:0046883	GO:0046883	regulation of hormone secretion	16/724	267/18866	0.0529384	0.393508	0.361204	BAD/DPP4/EDN1/FGFR1/GPLD1/HCAR2/HFE/INHBA/MIDN/MYB/PER2/SLC2A1/ADORA1/FFAR4/KCNS3/SYTL4	16
GO:0060491	GO:0060491	regulation of cell projection assembly	12/724	185/18866	0.0534623	0.393508	0.361204	ARHGAP35/CAV1/DMTN/EPHA2/KIT/NCKAP1/PPP1R9A/TENM2/EPS8L3/MAPK15/STAP1/TENM1	12
GO:0030330	GO:0030330	DNA damage response, signal transduction by p53 class mediator	8/724	107/18866	0.0535686	0.393508	0.361204	CDKN1A/E2F7/EEF1E1/FOXO3/GADD45A/GTSE1/SNAI1/ACER2	8
GO:0018210	GO:0018210	peptidyl-threonine modification	9/724	126/18866	0.0536396	0.393508	0.361204	CDC42BPG/CDK5/DDIT4/DGKQ/DMTN/TGFB1/TRPC5/TRPC6/EGF	9
GO:0045787	GO:0045787	positive regulation of cell cycle	22/724	396/18866	0.0536686	0.393508	0.361204	CDC16/CDKN1A/CITED2/CKS2/DTL/E2F7/EDN1/FAM83D/FGFR1/FGFR2/GADD45A/GTSE1/IGF1/KIF14/MAP10/NDC80/PPP2R5B/SETMAR/AURKC/MAPK15/PBX1/EGF	22
GO:0070482	GO:0070482	response to oxygen levels	22/724	396/18866	0.0536686	0.393508	0.361204	ADAM8/BAD/CAV1/CDKN1A/CITED2/CRYAB/DDIT4/DPP4/EDN1/FOXO3/KCNMB1/LONP1/MPL/MYB/PTK2B/PTN/SLC2A1/TGFBR3/TRPC6/ADORA1/CD34/VEGFA	22
GO:0090287	GO:0090287	regulation of cellular response to growth factor stimulus	18/724	310/18866	0.0539495	0.393508	0.361204	ADAMTS3/BAMBI/CAV1/CDKN2B/CHRD/CITED2/CRB2/FGFR1/PPP2R5B/RUNX2/SKIL/TGFB1/TGFBR3/ZEB1/DOK5/EID2/EMILIN1/HTRA4	18
GO:0001553	GO:0001553	luteinization	2/724	10/18866	0.0539499	0.393508	0.361204	INHBA/PLEKHA1	2
GO:0002327	GO:0002327	immature B cell differentiation	2/724	10/18866	0.0539499	0.393508	0.361204	KIT/RAG1	2
GO:0006547	GO:0006547	histidine metabolic process	2/724	10/18866	0.0539499	0.393508	0.361204	HDC/FTCD	2
GO:0015696	GO:0015696	ammonium transport	2/724	10/18866	0.0539499	0.393508	0.361204	RHCE/RHD	2
GO:0021859	GO:0021859	pyramidal neuron differentiation	2/724	10/18866	0.0539499	0.393508	0.361204	FGFR2/DCLK2	2
GO:0032815	GO:0032815	negative regulation of natural killer cell activation	2/724	10/18866	0.0539499	0.393508	0.361204	CLNK/PGLYRP1	2
GO:0033131	GO:0033131	regulation of glucokinase activity	2/724	10/18866	0.0539499	0.393508	0.361204	BAD/MIDN	2
GO:0034135	GO:0034135	regulation of toll-like receptor 2 signaling pathway	2/724	10/18866	0.0539499	0.393508	0.361204	MFHAS1/TNFAIP3	2
GO:0044557	GO:0044557	relaxation of smooth muscle	2/724	10/18866	0.0539499	0.393508	0.361204	PRKG1/ADORA1	2
GO:0048570	GO:0048570	notochord morphogenesis	2/724	10/18866	0.0539499	0.393508	0.361204	CRB2/EPHA2	2
GO:0050861	GO:0050861	positive regulation of B cell receptor signaling pathway	2/724	10/18866	0.0539499	0.393508	0.361204	PRKCH/STAP1	2
GO:0051231	GO:0051231	spindle elongation	2/724	10/18866	0.0539499	0.393508	0.361204	MAP10/AURKC	2
GO:0060068	GO:0060068	vagina development	2/724	10/18866	0.0539499	0.393508	0.361204	BAK1/ESR1	2
GO:0060502	GO:0060502	epithelial cell proliferation involved in lung morphogenesis	2/724	10/18866	0.0539499	0.393508	0.361204	FGFR2/NFIB	2
GO:0070099	GO:0070099	regulation of chemokine-mediated signaling pathway	2/724	10/18866	0.0539499	0.393508	0.361204	EDN1/PADI2	2
GO:0072488	GO:0072488	ammonium transmembrane transport	2/724	10/18866	0.0539499	0.393508	0.361204	RHCE/RHD	2
GO:0090527	GO:0090527	actin filament reorganization	2/724	10/18866	0.0539499	0.393508	0.361204	DMTN/WHAMM	2
GO:1901203	GO:1901203	positive regulation of extracellular matrix assembly	2/724	10/18866	0.0539499	0.393508	0.361204	TGFB1/EMILIN1	2
GO:2000048	GO:2000048	negative regulation of cell-cell adhesion mediated by cadherin	2/724	10/18866	0.0539499	0.393508	0.361204	PLG/VEGFA	2
GO:0022412	GO:0022412	cellular process involved in reproduction in multicellular organism	21/724	375/18866	0.0545658	0.39358	0.361271	DDX20/FOXO3/HORMAD1/IGF1/INHBA/KIT/MAST2/MEIKIN/PANX1/PTGDR2/PTK2B/PTN/TMEM119/TRIP13/WDR77/AURKC/BMPR1B/CCNA1/OCA2/DPY19L2/TEX19	21
GO:0050852	GO:0050852	T cell receptor signaling pathway	13/724	206/18866	0.0547014	0.39358	0.361271	BTN3A3/BTNL8/CD226/CRKL/EIF2B5/HLA-DQB2/PRKCQ/TESPA1/TRAT1/BTNL9/CD160/VTCN1/HLA-DQA1	13
GO:0033627	GO:0033627	cell adhesion mediated by integrin	6/724	71/18866	0.0547429	0.39358	0.361271	CRKL/DPP4/EPHA2/ITGB7/ITGBL1/ACER2	6
GO:0035690	GO:0035690	cellular response to drug	6/724	71/18866	0.0547429	0.39358	0.361271	CRKL/EDN1/GPLD1/KCNH2/UCHL1/ACER2	6
GO:0046579	GO:0046579	positive regulation of Ras protein signal transduction	6/724	71/18866	0.0547429	0.39358	0.361271	ADGRG1/ARHGEF3/CRKL/GPR174/IGF1/NTRK1	6
GO:0043010	GO:0043010	camera-type eye development	19/724	332/18866	0.054775	0.39358	0.361271	ACHE/ARHGAP35/B9D1/BAK1/COL8A2/CRYAB/EPHA2/INHBA/MITF/PPP1R13L/PTN/PTPRM/SKIL/TFAP2A/ZEB1/BMPR1B/COL8A1/GLI3/VEGFA	19
GO:0051147	GO:0051147	regulation of muscle cell differentiation	12/724	186/18866	0.0552563	0.39358	0.361271	EDN1/FGFR2/IGF1/KIT/MAPK11/NFATC1/TGFB1/TMEM119/TRIM72/ZEB1/BDNF/CDH15	12
GO:0007093	GO:0007093	mitotic cell cycle checkpoint	11/724	166/18866	0.0553848	0.39358	0.361271	CDKN1A/CDKN2B/E2F7/GADD45A/GTSE1/NDC80/SETMAR/TGFB1/TRIP13/WEE1/ZWINT	11
GO:0001919	GO:0001919	regulation of receptor recycling	3/724	23/18866	0.056351	0.39358	0.361271	ACHE/PCSK9/TRAT1	3
GO:0001956	GO:0001956	positive regulation of neurotransmitter secretion	3/724	23/18866	0.056351	0.39358	0.361271	CDK5/SYT1/UNC13B	3
GO:0006541	GO:0006541	glutamine metabolic process	3/724	23/18866	0.056351	0.39358	0.361271	CTPS1/GMPS/NIT2	3
GO:0010226	GO:0010226	response to lithium ion	3/724	23/18866	0.056351	0.39358	0.361271	EIF2B5/PTK2B/ACTA1	3
GO:0015813	GO:0015813	L-glutamate transmembrane transport	3/724	23/18866	0.056351	0.39358	0.361271	PER2/SLC25A22/SLC1A1	3
GO:0016048	GO:0016048	detection of temperature stimulus	3/724	23/18866	0.056351	0.39358	0.361271	NTRK1/ADORA1/TRPM3	3
GO:0032401	GO:0032401	establishment of melanosome localization	3/724	23/18866	0.056351	0.39358	0.361271	RAB27A/RAB27B/MREG	3
GO:0032703	GO:0032703	negative regulation of interleukin-2 production	3/724	23/18866	0.056351	0.39358	0.361271	TNFAIP3/CD34/NAV3	3
GO:0034643	GO:0034643	establishment of mitochondrion localization, microtubule-mediated	3/724	23/18866	0.056351	0.39358	0.361271	AGBL4/TRAK2/UCHL1	3
GO:0042451	GO:0042451	purine nucleoside biosynthetic process	3/724	23/18866	0.056351	0.39358	0.361271	ADAL/GMPS/MTAP	3
GO:0042455	GO:0042455	ribonucleoside biosynthetic process	3/724	23/18866	0.056351	0.39358	0.361271	ADAL/GMPS/MTAP	3
GO:0043586	GO:0043586	tongue development	3/724	23/18866	0.056351	0.39358	0.361271	KIT/BDNF/GLI3	3
GO:0045649	GO:0045649	regulation of macrophage differentiation	3/724	23/18866	0.056351	0.39358	0.361271	GATA2/INHBA/TGFB1	3
GO:0046129	GO:0046129	purine ribonucleoside biosynthetic process	3/724	23/18866	0.056351	0.39358	0.361271	ADAL/GMPS/MTAP	3
GO:0047497	GO:0047497	mitochondrion transport along microtubule	3/724	23/18866	0.056351	0.39358	0.361271	AGBL4/TRAK2/UCHL1	3
GO:0048791	GO:0048791	calcium ion-regulated exocytosis of neurotransmitter	3/724	23/18866	0.056351	0.39358	0.361271	RIMS3/SYT1/UNC13B	3
GO:0050951	GO:0050951	sensory perception of temperature stimulus	3/724	23/18866	0.056351	0.39358	0.361271	NTRK1/ADORA1/TRPM3	3
GO:0051904	GO:0051904	pigment granule transport	3/724	23/18866	0.056351	0.39358	0.361271	RAB27A/RAB27B/MREG	3
GO:0072677	GO:0072677	eosinophil migration	3/724	23/18866	0.056351	0.39358	0.361271	ADAM8/DAPK2/EPX	3
GO:1903589	GO:1903589	positive regulation of blood vessel endothelial cell proliferation involved in sprouting angiogenesis	3/724	23/18866	0.056351	0.39358	0.361271	GATA2/MIR101-1/VEGFA	3
GO:1903861	GO:1903861	positive regulation of dendrite extension	3/724	23/18866	0.056351	0.39358	0.361271	PLAA/RNF157/SYT1	3
GO:2000810	GO:2000810	regulation of bicellular tight junction assembly	3/724	23/18866	0.056351	0.39358	0.361271	EPHA2/PRKCH/SNAI1	3
GO:0032689	GO:0032689	negative regulation of interferon-gamma production	4/724	38/18866	0.0566838	0.393677	0.36136	IL1RL1/INHBA/PDCD1LG2/PGLYRP1	4
GO:0032885	GO:0032885	regulation of polysaccharide biosynthetic process	4/724	38/18866	0.0566838	0.393677	0.36136	IGF1/TGFB1/EGF/ENPP1	4
GO:0060306	GO:0060306	regulation of membrane repolarization	4/724	38/18866	0.0566838	0.393677	0.36136	AKAP9/CAV1/KCNH2/NOS1AP	4
GO:0086005	GO:0086005	ventricular cardiac muscle cell action potential	4/724	38/18866	0.0566838	0.393677	0.36136	CAV1/KCNH2/PKP2/NOS1AP	4
GO:0055123	GO:0055123	digestive system development	10/724	147/18866	0.0570098	0.394381	0.362005	CDKN1A/CRKL/CXCL8/FGFR2/KIT/PDGFC/TCF7/FAT4/GLI3/HNF1B	10
GO:1904064	GO:1904064	positive regulation of cation transmembrane transport	10/724	147/18866	0.0570098	0.394381	0.362005	AKAP9/CD19/CDK5/KCNH2/KCNMB1/WNK2/ANK3/ATP2A1/NOS1AP/SHANK3	10
GO:0008217	GO:0008217	regulation of blood pressure	12/724	187/18866	0.0570905	0.394381	0.362005	ACSM3/CTSG/EDN1/ENPEP/OPRL1/PTGS1/RNPEP/SPX/UTS2B/ADORA1/CD34/NPPB	12
GO:0048705	GO:0048705	skeletal system morphogenesis	14/724	228/18866	0.0571045	0.394381	0.362005	BMP1/FGFR1/FGFR2/HOXA9/LTF/PLEKHA1/RUNX2/TFAP2A/TMEM119/ZEB1/BMPR1B/FREM1/GLI3/MMP16	14
GO:0050663	GO:0050663	cytokine secretion	6/724	72/18866	0.0578747	0.399142	0.366376	NOD2/PANX1/S100A12/CD34/CLEC4E/FFAR4	6
GO:1903409	GO:1903409	reactive oxygen species biosynthetic process	9/724	128/18866	0.0581495	0.400478	0.367602	CAV1/EDN1/FOXO3/PTK2B/RAB27A/TICAM1/CD34/NOS1AP/SLC18A2	9
GO:0021761	GO:0021761	limbic system development	8/724	109/18866	0.058513	0.401645	0.368673	CDK5/CRKL/EIF2B5/FGFR1/FGFR2/KIF14/DCLK2/GLI3	8
GO:0033138	GO:0033138	positive regulation of peptidyl-serine phosphorylation	8/724	109/18866	0.058513	0.401645	0.368673	AKAP9/ANGPT1/CAV1/SMYD3/TGFB1/BDNF/TENM1/VEGFA	8
GO:0001933	GO:0001933	negative regulation of protein phosphorylation	24/724	444/18866	0.0585631	0.401645	0.368673	ANGPT1/BAK1/CAV1/CDKN1A/CDKN2B/CRKL/DDIT4/DGKQ/DMTN/GADD45A/MBIP/PER1/SEMA4D/SMYD3/SOCS3/TGFB1/TIMP3/TNFAIP3/UCHL1/WNK2/EMILIN1/PIP5KL1/PKIA/ENPP1	24
GO:0006836	GO:0006836	neurotransmitter transport	14/724	229/18866	0.0587874	0.402067	0.369061	CDK5/GRIN3A/LIN7A/PER2/PPP1R9A/PREPL/RIMS3/SLC6A9/SYT1/UNC13B/SLC18A2/SLC22A1/SV2C/SYNGR3	14
GO:0050920	GO:0050920	regulation of chemotaxis	14/724	229/18866	0.0587874	0.402067	0.369061	CXCL8/DAPK2/DPP4/EDN1/FGFR1/PADI2/PTK2B/PTN/SEMA4D/SEMA6B/TGFB1/ELANE/STAP1/VEGFA	14
GO:0002720	GO:0002720	positive regulation of cytokine production involved in immune response	5/724	55/18866	0.0592053	0.403249	0.370146	CD226/CLNK/NOD2/TICAM1/CD160	5
GO:0002931	GO:0002931	response to ischemia	5/724	55/18866	0.0592053	0.403249	0.370146	CAV1/PANX1/PER2/SLC8A2/UCHL1	5
GO:0008347	GO:0008347	glial cell migration	5/724	55/18866	0.0592053	0.403249	0.370146	ADGRG1/CDK5/CRKL/GLI3/STAP1	5
GO:0046879	GO:0046879	hormone secretion	18/724	314/18866	0.0595574	0.404413	0.371214	BAD/DPP4/EDN1/FGFR1/GPLD1/HCAR2/HFE/INHBA/MIDN/MYB/PER2/SLC16A2/SLC2A1/ADORA1/FFAR4/HNF1B/KCNS3/SYTL4	18
GO:0009612	GO:0009612	response to mechanical stimulus	13/724	209/18866	0.0599744	0.404413	0.371214	BAD/BAK1/EDN1/FOSB/GADD45A/KIT/NTRK1/PTK2B/PTN/SCEL/SLC2A1/ACTA1/SHANK3	13
GO:0051604	GO:0051604	protein maturation	17/724	293/18866	0.060127	0.404413	0.371214	ADAM8/ADAMTS3/BAD/BAK1/CHAC1/CTSG/DISP1/DNAJB11/DYNC2H1/ENPEP/FKRP/HP/PCSK9/PRSS12/GLI3/MMP16/PCSK1	17
GO:0045921	GO:0045921	positive regulation of exocytosis	7/724	91/18866	0.060475	0.404413	0.371214	CDK5/GATA2/RAB27A/RAB27B/SYT1/UNC13B/SYTL4	7
GO:0060021	GO:0060021	roof of mouth development	7/724	91/18866	0.060475	0.404413	0.371214	INHBA/MSC/PLEKHA1/SNAI1/TFAP2A/TGFBR3/GLI3	7
GO:1901379	GO:1901379	regulation of potassium ion transmembrane transport	7/724	91/18866	0.060475	0.404413	0.371214	AKAP9/CAV1/KCNH2/KCNMB1/WNK2/ANK3/NOS1AP	7
GO:1904063	GO:1904063	negative regulation of cation transmembrane transport	7/724	91/18866	0.060475	0.404413	0.371214	CAV1/KCNH2/OPRL1/PCSK9/SLC6A9/ANK3/GEM	7
GO:0098813	GO:0098813	nuclear chromosome segregation	16/724	272/18866	0.0605093	0.404413	0.371214	CDC16/CDCA8/CENPK/DSCC1/FAM83D/HORMAD1/KIF14/KPNB1/MAP10/MEIKIN/NDC80/TRIP13/ZWINT/AURKC/MAPK15/GEM	16
GO:0032680	GO:0032680	regulation of tumor necrosis factor production	8/724	110/18866	0.0610896	0.404413	0.371214	ANGPT1/BPI/IGF1/LTF/NOD2/TICAM1/TNFAIP3/CD34	8
GO:0072009	GO:0072009	nephron epithelium development	8/724	110/18866	0.0610896	0.404413	0.371214	AQP11/KIF26B/CD34/FAT4/GLI3/HNF1B/PBX1/VEGFA	8
GO:0003208	GO:0003208	cardiac ventricle morphogenesis	6/724	73/18866	0.0611117	0.404413	0.371214	FGFR2/PKP2/PPP1R13L/TGFB1/TGFBR3/TNNC1	6
GO:0010517	GO:0010517	regulation of phospholipase activity	6/724	73/18866	0.0611117	0.404413	0.371214	ESR1/FGFR1/FGFR2/KIT/PLAA/BDNF	6
GO:0051966	GO:0051966	regulation of synaptic transmission, glutamatergic	6/724	73/18866	0.0611117	0.404413	0.371214	CDK5/NTRK1/PTK2B/SYT1/ADORA1/SHANK3	6
GO:0072078	GO:0072078	nephron tubule morphogenesis	6/724	73/18866	0.0611117	0.404413	0.371214	KIF26B/FAT4/GLI3/HNF1B/PBX1/VEGFA	6
GO:0001662	GO:0001662	behavioral fear response	4/724	39/18866	0.0613265	0.404413	0.371214	DPP4/BDNF/LYPD1/RAG1	4
GO:0007431	GO:0007431	salivary gland development	4/724	39/18866	0.0613265	0.404413	0.371214	FGFR1/FGFR2/NFIB/TGFB1	4
GO:0009163	GO:0009163	nucleoside biosynthetic process	4/724	39/18866	0.0613265	0.404413	0.371214	ADAL/CDA/GMPS/MTAP	4
GO:0086091	GO:0086091	regulation of heart rate by cardiac conduction	4/724	39/18866	0.0613265	0.404413	0.371214	AKAP9/CAV1/KCNH2/PKP2	4
GO:0002573	GO:0002573	myeloid leukocyte differentiation	13/724	210/18866	0.0618053	0.404413	0.371214	EPHA2/GATA1/GATA2/INHBA/KIT/KLF10/LRRC17/LTF/MITF/OSCAR/TGFB1/TSPAN2/VEGFA	13
GO:0006109	GO:0006109	regulation of carbohydrate metabolic process	13/724	210/18866	0.0618053	0.404413	0.371214	BAD/DDIT4/DGKQ/GPLD1/IGF1/MIDN/POM121/PTK2B/SDHAF3/SLC2A6/TGFB1/EGF/ENPP1	13
GO:0034764	GO:0034764	positive regulation of transmembrane transport	13/724	210/18866	0.0618053	0.404413	0.371214	ABCB1/AKAP9/CD19/CDK5/IGF1/KCNH2/KCNMB1/TRPC6/WNK2/ANK3/ATP2A1/NOS1AP/SHANK3	13
GO:0043122	GO:0043122	regulation of I-kappaB kinase/NF-kappaB signaling	15/724	252/18866	0.0623277	0.404413	0.371214	ANGPT1/ESR1/LTF/MIB2/MIER1/NOD2/PER1/PLEKHG5/RHOH/S100A12/TANK/TICAM1/TNFAIP3/TRADD/TSPAN6	15
GO:0071560	GO:0071560	cellular response to transforming growth factor beta stimulus	15/724	252/18866	0.0623277	0.404413	0.371214	BAMBI/CAV1/CDKN2B/CITED2/CRKL/EDN1/FGFR2/SKIL/TGFB1/TGFBR3/ZEB1/EID2/EMILIN1/HPGD/HTRA4	15
GO:0002791	GO:0002791	regulation of peptide secretion	21/724	381/18866	0.062338	0.404413	0.371214	ACHE/ADAM8/BAD/DISP1/DPP4/GPLD1/HCAR2/HFE/IGF1/MIDN/PANX1/PER2/SLC2A1/TGFB1/UNC13B/ADORA1/CD34/CLEC4E/FFAR4/KCNS3/SYTL4	21
GO:0050727	GO:0050727	regulation of inflammatory response	23/724	425/18866	0.062383	0.404413	0.371214	ADAM8/CD200R1L/DNASE1/ESR1/HCK/IGF1/IL1RL1/MEFV/MFHAS1/NOD2/PER1/PGLYRP1/S100A12/SOCS3/TICAM1/TNFAIP3/TRADD/ADORA1/ELANE/FFAR4/IL22RA2/KRT1/STAP1	23
GO:0019883	GO:0019883	antigen processing and presentation of endogenous antigen	3/724	24/18866	0.0626307	0.404413	0.371214	CD1E/HFE/TAP2	3
GO:0021544	GO:0021544	subpallium development	3/724	24/18866	0.0626307	0.404413	0.371214	INHBA/GLI3/SHANK3	3
GO:0021801	GO:0021801	cerebral cortex radial glia guided migration	3/724	24/18866	0.0626307	0.404413	0.371214	ADGRG1/CDK5/GLI3	3
GO:0022030	GO:0022030	telencephalon glial cell migration	3/724	24/18866	0.0626307	0.404413	0.371214	ADGRG1/CDK5/GLI3	3
GO:0034123	GO:0034123	positive regulation of toll-like receptor signaling pathway	3/724	24/18866	0.0626307	0.404413	0.371214	CAV1/LTF/MFHAS1	3
GO:0034143	GO:0034143	regulation of toll-like receptor 4 signaling pathway	3/724	24/18866	0.0626307	0.404413	0.371214	LTF/MFHAS1/TNFAIP3	3
GO:0050995	GO:0050995	negative regulation of lipid catabolic process	3/724	24/18866	0.0626307	0.404413	0.371214	GPLD1/HCAR2/ADORA1	3
GO:0051905	GO:0051905	establishment of pigment granule localization	3/724	24/18866	0.0626307	0.404413	0.371214	RAB27A/RAB27B/MREG	3
GO:0098743	GO:0098743	cell aggregation	3/724	24/18866	0.0626307	0.404413	0.371214	BMP1/LTF/BMPR1B	3
GO:0030308	GO:0030308	negative regulation of cell growth	12/724	190/18866	0.0628361	0.404413	0.371214	CDA/CDK5/CDKN1A/CRYAB/INHBA/MAP2/RBBP7/SEMA4D/SEMA6B/TGFB1/NPPB/ENPP1	12
GO:0031295	GO:0031295	T cell costimulation	5/724	56/18866	0.063054	0.404413	0.371214	BTLA/CAV1/DPP4/PDCD1LG2/CD160	5
GO:0060688	GO:0060688	regulation of morphogenesis of a branching structure	5/724	56/18866	0.063054	0.404413	0.371214	ESR1/FGFR1/FGFR2/HNF1B/VEGFA	5
GO:1903307	GO:1903307	positive regulation of regulated secretory pathway	5/724	56/18866	0.063054	0.404413	0.371214	CDK5/GATA2/RAB27A/SYT1/UNC13B	5
GO:0031341	GO:0031341	regulation of cell killing	7/724	92/18866	0.0633991	0.404413	0.371214	BAD/CD1E/CD226/DNASE1/PIK3R6/CD160/STAP1	7
GO:0001818	GO:0001818	negative regulation of cytokine production	20/724	360/18866	0.0634977	0.404413	0.371214	BPI/EPHA2/EPX/FGFR1/HFE/IGF1/IL1RL1/INHBA/LTF/MEFV/MIR101-1/PDCD1LG2/PGLYRP1/TGFB1/TNFAIP3/TRAIP/CD34/ELANE/FFAR4/NAV3	20
GO:0002703	GO:0002703	regulation of leukocyte mediated immunity	13/724	211/18866	0.0636731	0.404413	0.371214	CD1E/CD226/CLC/CLNK/DNASE1/GATA2/HFE/NOD2/PIK3R6/TGFB1/TICAM1/CD160/STAP1	13
GO:0043393	GO:0043393	regulation of protein binding	13/724	211/18866	0.0636731	0.404413	0.371214	ANGPT1/BAMBI/CAV1/CDK5/CDKN1A/HFE/MAP2/PCSK9/RAMP1/TGFBR3/TICAM1/BDNF/PLCL1	13
GO:0032652	GO:0032652	regulation of interleukin-1 production	8/724	111/18866	0.0637364	0.404413	0.371214	IGF1/MEFV/MIR101-1/NOD2/PANX1/S1PR3/TNFAIP3/FFAR4	8
GO:0051896	GO:0051896	regulation of protein kinase B signaling	15/724	253/18866	0.0640308	0.404413	0.371214	ADAM8/ANGPT1/CD19/EPHA2/ESR1/FGFR1/FGFR2/KIT/MFHAS1/NTRK1/PLEKHA1/PPP2R5B/TGFB1/TRAT1/EGF	15
GO:0006182	GO:0006182	cGMP biosynthetic process	2/724	11/18866	0.0643006	0.404413	0.371214	GUCY1A2/NPPB	2
GO:0019852	GO:0019852	L-ascorbic acid metabolic process	2/724	11/18866	0.0643006	0.404413	0.371214	SLC2A1/GSTO2	2
GO:0033483	GO:0033483	gas homeostasis	2/724	11/18866	0.0643006	0.404413	0.371214	AQP11/CAV1	2
GO:0035090	GO:0035090	maintenance of apical/basal cell polarity	2/724	11/18866	0.0643006	0.404413	0.371214	CRB2/LIN7A	2
GO:0042985	GO:0042985	negative regulation of amyloid precursor protein biosynthetic process	2/724	11/18866	0.0643006	0.404413	0.371214	ITM2A/MIR101-1	2
GO:0045199	GO:0045199	maintenance of epithelial cell apical/basal polarity	2/724	11/18866	0.0643006	0.404413	0.371214	CRB2/LIN7A	2
GO:0045835	GO:0045835	negative regulation of meiotic nuclear division	2/724	11/18866	0.0643006	0.404413	0.371214	HORMAD1/TRIP13	2
GO:0048672	GO:0048672	positive regulation of collateral sprouting	2/724	11/18866	0.0643006	0.404413	0.371214	SEMA4D/BDNF	2
GO:0051610	GO:0051610	serotonin uptake	2/724	11/18866	0.0643006	0.404413	0.371214	SLC18A2/SLC22A1	2
GO:0060354	GO:0060354	negative regulation of cell adhesion molecule production	2/724	11/18866	0.0643006	0.404413	0.371214	CXCL8/MIR101-1	2
GO:0070254	GO:0070254	mucus secretion	2/724	11/18866	0.0643006	0.404413	0.371214	P2RY2/ADORA1	2
GO:0070778	GO:0070778	L-aspartate transmembrane transport	2/724	11/18866	0.0643006	0.404413	0.371214	SLC25A22/SLC1A1	2
GO:0071281	GO:0071281	cellular response to iron ion	2/724	11/18866	0.0643006	0.404413	0.371214	HFE/TFAP2A	2
GO:0150104	GO:0150104	transport across blood-brain barrier	2/724	11/18866	0.0643006	0.404413	0.371214	ABCB1/SLC22A1	2
GO:1903299	GO:1903299	regulation of hexokinase activity	2/724	11/18866	0.0643006	0.404413	0.371214	BAD/MIDN	2
GO:1904396	GO:1904396	regulation of neuromuscular junction development	2/724	11/18866	0.0643006	0.404413	0.371214	CRKL/PTN	2
GO:0034121	GO:0034121	regulation of toll-like receptor signaling pathway	6/724	74/18866	0.0644539	0.404413	0.371214	CAV1/ESR1/LTF/MFHAS1/TICAM1/TNFAIP3	6
GO:0036465	GO:0036465	synaptic vesicle recycling	6/724	74/18866	0.0644539	0.404413	0.371214	CDK5/DGKQ/PLAA/PPP3CC/RAB27B/SYT1	6
GO:0001701	GO:0001701	in utero embryonic development	21/724	383/18866	0.0650918	0.407898	0.374413	ADAMTS3/ANGPT1/B9D1/E2F7/EDN1/FGFR1/FGFR2/GATA1/GATA2/HORMAD1/IGF1/PLG/SKIL/SLC25A20/SNAI1/SOCS3/ETNK2/GLI3/HNF1B/TET1/VEGFA	21
GO:0046887	GO:0046887	positive regulation of hormone secretion	9/724	131/18866	0.0653601	0.40906	0.375479	BAD/EDN1/FGFR1/GPLD1/HCAR2/HFE/INHBA/MYB/FFAR4	9
GO:0090092	GO:0090092	regulation of transmembrane receptor protein serine/threonine kinase signaling pathway	15/724	254/18866	0.0657651	0.411073	0.377328	BAMBI/CAV1/CDKN2B/CHRD/CITED2/CRB2/HFE/INHBA/SKIL/TGFB1/TGFBR3/ZEB1/EID2/EMILIN1/HTRA4	15
GO:0008643	GO:0008643	carbohydrate transport	10/724	151/18866	0.065873	0.411228	0.377469	AQP11/AQP9/EDN1/IGF1/SLC2A1/SLC2A6/SLC37A3/FFAR4/SLC45A1/ENPP1	10
GO:0002209	GO:0002209	behavioral defense response	4/724	40/18866	0.0661637	0.411482	0.377703	DPP4/BDNF/LYPD1/RAG1	4
GO:0034142	GO:0034142	toll-like receptor 4 signaling pathway	4/724	40/18866	0.0661637	0.411482	0.377703	LTF/MFHAS1/TNFAIP3/TRIL	4
GO:0071526	GO:0071526	semaphorin-plexin signaling pathway	4/724	40/18866	0.0661637	0.411482	0.377703	PLXNC1/SEMA4D/SEMA6B/NCAM1	4
GO:0000280	GO:0000280	nuclear division	23/724	428/18866	0.0663117	0.411883	0.378071	CDC16/CDCA8/CENPK/CEP192/CKS2/DSCC1/EDN1/HORMAD1/IGF1/KIF14/KPNB1/MAP10/MEIKIN/MYBL2/NDC80/TRIP13/ZWINT/AURKC/CCNA1/MAPK15/CCDC8/EGF/TEX19	23
GO:0072080	GO:0072080	nephron tubule development	7/724	93/18866	0.0664077	0.411962	0.378143	AQP11/KIF26B/FAT4/GLI3/HNF1B/PBX1/VEGFA	7
GO:0006576	GO:0006576	cellular biogenic amine metabolic process	5/724	57/18866	0.0670403	0.413772	0.379804	AFMID/HDC/PRG3/TPH1/AGMAT	5
GO:0042743	GO:0042743	hydrogen peroxide metabolic process	5/724	57/18866	0.0670403	0.413772	0.379804	EPX/HBD/HP/LPO/PXDNL	5
GO:0097479	GO:0097479	synaptic vesicle localization	5/724	57/18866	0.0670403	0.413772	0.379804	CDK5/LIN7A/MAP2/PCDH17/RAB27A	5
GO:1903556	GO:1903556	negative regulation of tumor necrosis factor superfamily cytokine production	5/724	57/18866	0.0670403	0.413772	0.379804	BPI/IGF1/LTF/TNFAIP3/CD34	5
GO:0051961	GO:0051961	negative regulation of nervous system development	18/724	319/18866	0.0671185	0.413772	0.379804	ADGRG1/CDK5/DAAM2/FOXO3/MAP2/PMP22/PTN/SEMA4D/SEMA6B/SPOCK1/TBX6/TRAK2/TRPC5/TRPC6/BDNF/GLI3/PBX1/STAP1	18
GO:0016051	GO:0016051	carbohydrate biosynthetic process	13/724	213/18866	0.0675204	0.413947	0.379965	B4GALT5/DGKQ/GBE1/IGF1/PER2/PTK2B/SDHAF3/SLC2A1/SORD/ST3GAL4/TGFB1/EGF/ENPP1	13
GO:0043687	GO:0043687	post-translational protein modification	20/724	363/18866	0.0678474	0.413947	0.379965	AGBL4/ASB6/CRTAP/DCAF8/DSCC1/DTL/F5/FBXL18/GPLD1/LRR1/PCSK9/QSOX1/RAB13/RAB38/RBBP7/SOCS3/FBXO32/C4A/CCDC8/FBXW12	20
GO:0001910	GO:0001910	regulation of leukocyte mediated cytotoxicity	6/724	75/18866	0.0679013	0.413947	0.379965	CD1E/CD226/DNASE1/PIK3R6/CD160/STAP1	6
GO:0009064	GO:0009064	glutamine family amino acid metabolic process	6/724	75/18866	0.0679013	0.413947	0.379965	CTPS1/GMPS/NIT2/PYCR1/AGMAT/FTCD	6
GO:0031100	GO:0031100	animal organ regeneration	6/724	75/18866	0.0679013	0.413947	0.379965	BAK1/CDKN1A/HFE/PNPT1/TGFBR3/GLI3	6
GO:0035019	GO:0035019	somatic stem cell population maintenance	6/724	75/18866	0.0679013	0.413947	0.379965	GATA2/KIT/KLF10/TDGF1/HNF1B/PBX1	6
GO:0072088	GO:0072088	nephron epithelium morphogenesis	6/724	75/18866	0.0679013	0.413947	0.379965	KIF26B/FAT4/GLI3/HNF1B/PBX1/VEGFA	6
GO:0086001	GO:0086001	cardiac muscle cell action potential	6/724	75/18866	0.0679013	0.413947	0.379965	AKAP9/CAV1/KCNH2/PKP2/ANK3/NOS1AP	6
GO:1900006	GO:1900006	positive regulation of dendrite development	6/724	75/18866	0.0679013	0.413947	0.379965	CUX1/DLG5/PPP1R9A/PTN/TMEM106B/SHANK3	6
GO:0032400	GO:0032400	melanosome localization	3/724	25/18866	0.069219	0.418034	0.383717	RAB27A/RAB27B/MREG	3
GO:0048169	GO:0048169	regulation of long-term neuronal synaptic plasticity	3/724	25/18866	0.069219	0.418034	0.383717	DLG4/KIT/SHANK3	3
GO:0097164	GO:0097164	ammonium ion metabolic process	3/724	25/18866	0.069219	0.418034	0.383717	HDC/PRG3/TPH1	3
GO:1903859	GO:1903859	regulation of dendrite extension	3/724	25/18866	0.069219	0.418034	0.383717	PLAA/RNF157/SYT1	3
GO:0007009	GO:0007009	plasma membrane organization	8/724	113/18866	0.069241	0.418034	0.383717	BIN2/CAV1/TRIM72/WHAMM/ANK3/DMKN/FAT4/SYTL4	8
GO:0043523	GO:0043523	regulation of neuron apoptotic process	13/724	214/18866	0.0695002	0.418034	0.383717	ADAM8/ANGPT1/CDK5/FOXO3/KIF14/MYB/MYBL2/NTRK1/PCSK9/PTK2B/RASA1/TFAP2A/BDNF	13
GO:0060993	GO:0060993	kidney morphogenesis	7/724	94/18866	0.0695011	0.418034	0.383717	GCNT4/KIF26B/FAT4/GLI3/HNF1B/PBX1/VEGFA	7
GO:1904035	GO:1904035	regulation of epithelial cell apoptotic process	7/724	94/18866	0.0695011	0.418034	0.383717	ANGPT1/BAD/FOXO3/GATA2/MIR101-1/TNFAIP3/CD160	7
GO:0001505	GO:0001505	regulation of neurotransmitter levels	14/724	235/18866	0.0695909	0.418034	0.383717	ACHE/CDK5/GRIN3A/LIN7A/PER2/PPP1R9A/PREPL/RIMS3/SLC6A9/SYT1/UNC13B/SLC18A2/SLC22A1/SYNGR3	14
GO:0006937	GO:0006937	regulation of muscle contraction	11/724	173/18866	0.0700359	0.418034	0.383717	AKAP9/CAV1/EDN1/KIT/PKP2/PRKG1/SPX/TNNC1/ADORA1/ATP2A1/NOS1AP	11
GO:0021543	GO:0021543	pallium development	11/724	173/18866	0.0700359	0.418034	0.383717	ADGRG1/BAD/CDK5/CRKL/EIF2B5/KIF14/SLC2A1/TACC2/DCLK2/FAT4/GLI3	11
GO:0042770	GO:0042770	signal transduction in response to DNA damage	9/724	133/18866	0.0704671	0.418034	0.383717	CDKN1A/DTL/E2F7/EEF1E1/FOXO3/GADD45A/GTSE1/SNAI1/ACER2	9
GO:0090101	GO:0090101	negative regulation of transmembrane receptor protein serine/threonine kinase signaling pathway	9/724	133/18866	0.0704671	0.418034	0.383717	BAMBI/CAV1/CHRD/SKIL/TGFB1/TGFBR3/EID2/EMILIN1/HTRA4	9
GO:0043491	GO:0043491	protein kinase B signaling	16/724	278/18866	0.0705318	0.418034	0.383717	ADAM8/ANGPT1/CD19/EPHA2/ESR1/FGFR1/FGFR2/IGF1/KIT/MFHAS1/NTRK1/PLEKHA1/PPP2R5B/TGFB1/TRAT1/EGF	16
GO:0030048	GO:0030048	actin filament-based movement	10/724	153/18866	0.0706176	0.418034	0.383717	AKAP9/CAV1/KCNH2/MYL6B/PKP2/TNNC1/ACTA1/ADORA1/ATP2A1/NOS1AP	10
GO:0048285	GO:0048285	organelle fission	25/724	476/18866	0.0708576	0.418034	0.383717	ACOT8/CDC16/CDCA8/CENPK/CEP192/CKS2/DSCC1/EDN1/GDAP1/HORMAD1/IGF1/KIF14/KPNB1/MAP10/MEIKIN/MYBL2/NDC80/TRIP13/ZWINT/AURKC/CCNA1/MAPK15/CCDC8/EGF/TEX19	25
GO:0031294	GO:0031294	lymphocyte costimulation	5/724	58/18866	0.0711636	0.418034	0.383717	BTLA/CAV1/DPP4/PDCD1LG2/CD160	5
GO:0001941	GO:0001941	postsynaptic membrane organization	4/724	41/18866	0.0711932	0.418034	0.383717	CRKL/DLG4/PTN/SHANK3	4
GO:0035337	GO:0035337	fatty-acyl-CoA metabolic process	4/724	41/18866	0.0711932	0.418034	0.383717	ACOT7/ELOVL7/HACD1/ELOVL6	4
GO:0042596	GO:0042596	fear response	4/724	41/18866	0.0711932	0.418034	0.383717	DPP4/BDNF/LYPD1/RAG1	4
GO:0043267	GO:0043267	negative regulation of potassium ion transport	4/724	41/18866	0.0711932	0.418034	0.383717	CAV1/KCNH2/PTK2B/ANK3	4
GO:0051180	GO:0051180	vitamin transport	4/724	41/18866	0.0711932	0.418034	0.383717	LMBRD1/SLC2A1/SLC2A6/TCN1	4
GO:0089718	GO:0089718	amino acid import across plasma membrane	4/724	41/18866	0.0711932	0.418034	0.383717	PER2/SLC16A2/SLC6A9/SLC1A1	4
GO:0008306	GO:0008306	associative learning	6/724	76/18866	0.0714539	0.418034	0.383717	CDK5/KIT/NRGN/OPRL1/RIN1/RAG1	6
GO:0060193	GO:0060193	positive regulation of lipase activity	6/724	76/18866	0.0714539	0.418034	0.383717	ESR1/FGFR1/FGFR2/KIT/PLAA/BDNF	6
GO:1903524	GO:1903524	positive regulation of blood circulation	6/724	76/18866	0.0714539	0.418034	0.383717	CAV1/EDN1/ATP2A1/NOS1AP/SLC1A1/PTGER2	6
GO:0001659	GO:0001659	temperature homeostasis	11/724	174/18866	0.0723136	0.418034	0.383717	ACHE/CAV1/FTO/PDGFC/PER2/PTH2R/ADORA1/FFAR4/VEGFA/ELOVL6/PLCL1	11
GO:0061326	GO:0061326	renal tubule development	7/724	95/18866	0.0726791	0.418034	0.383717	AQP11/KIF26B/FAT4/GLI3/HNF1B/PBX1/VEGFA	7
GO:1901617	GO:1901617	organic hydroxy compound biosynthetic process	15/724	258/18866	0.0730159	0.418034	0.383717	ACOT8/DGKQ/HDC/KPNB1/OSBPL6/PER2/PTK2B/SNAI1/SPTLC1/TPH1/ACER2/CYP27A1/DKKL1/OCA2/ELOVL6	15
GO:0010977	GO:0010977	negative regulation of neuron projection development	10/724	154/18866	0.0730688	0.418034	0.383717	CDK5/MAP2/PMP22/SEMA4D/SEMA6B/SPOCK1/TBX6/TRAK2/TRPC5/TRPC6	10
GO:0048588	GO:0048588	developmental cell growth	14/724	237/18866	0.0734652	0.418034	0.383717	CDK5/EDN1/IGF1/MAP2/NRCAM/PLAA/RNF157/SEMA4D/SEMA6B/SYT1/TNFRSF12A/TRPC5/BDNF/VEGFA	14
GO:0009914	GO:0009914	hormone transport	18/724	323/18866	0.0736187	0.418034	0.383717	BAD/DPP4/EDN1/FGFR1/GPLD1/HCAR2/HFE/INHBA/MIDN/MYB/PER2/SLC16A2/SLC2A1/ADORA1/FFAR4/HNF1B/KCNS3/SYTL4	18
GO:0051098	GO:0051098	regulation of binding	20/724	367/18866	0.0739582	0.418034	0.383717	ANGPT1/BAMBI/CAV1/CDK5/CDKN1A/EDF1/GATA1/HFE/IGF1/KDM4D/MAP2/PCSK9/PER2/RAMP1/TGFB1/TGFBR3/TICAM1/BDNF/EGF/PLCL1	20
GO:0048562	GO:0048562	embryonic organ morphogenesis	17/724	302/18866	0.0748496	0.418034	0.383717	CRB2/EDN1/EPHA2/FGFR1/FGFR2/GATA2/GJB6/HOXA9/RUNX2/TBX6/TCF7/TFAP2A/TPRN/ZEB1/GLI3/HNF1B/MMP16	17
GO:0050890	GO:0050890	cognition	17/724	302/18866	0.0748496	0.418034	0.383717	CDK5/DLG4/KIT/NRGN/NRXN3/NTRK1/OPRL1/PTN/RIN1/SLC8A2/ST3GAL4/TMOD2/ADORA1/BDNF/RAG1/SHROOM4/SHANK3	17
GO:0051225	GO:0051225	spindle assembly	8/724	115/18866	0.0750281	0.418034	0.383717	CEP192/HAUS5/KPNB1/MAP10/MYBL2/AURKC/MAPK15/TUBB1	8
GO:0014015	GO:0014015	positive regulation of gliogenesis	6/724	77/18866	0.0751113	0.418034	0.383717	CRKL/MYB/PRKCH/PTN/TGFB1/TENM4	6
GO:0032413	GO:0032413	negative regulation of ion transmembrane transporter activity	6/724	77/18866	0.0751113	0.418034	0.383717	CAV1/OPRL1/PCSK9/SLC6A9/ANK3/GEM	6
GO:0046785	GO:0046785	microtubule polymerization	6/724	77/18866	0.0751113	0.418034	0.383717	AKAP9/CEP192/EML2/MAP2/SLAIN2/NAV3	6
GO:0061333	GO:0061333	renal tubule morphogenesis	6/724	77/18866	0.0751113	0.418034	0.383717	KIF26B/FAT4/GLI3/HNF1B/PBX1/VEGFA	6
GO:0072028	GO:0072028	nephron morphogenesis	6/724	77/18866	0.0751113	0.418034	0.383717	KIF26B/FAT4/GLI3/HNF1B/PBX1/VEGFA	6
GO:0001778	GO:0001778	plasma membrane repair	2/724	12/18866	0.0752504	0.418034	0.383717	TRIM72/SYTL4	2
GO:0002002	GO:0002002	regulation of angiotensin levels in blood	2/724	12/18866	0.0752504	0.418034	0.383717	CTSG/ENPEP	2
GO:0002003	GO:0002003	angiotensin maturation	2/724	12/18866	0.0752504	0.418034	0.383717	CTSG/ENPEP	2
GO:0002551	GO:0002551	mast cell chemotaxis	2/724	12/18866	0.0752504	0.418034	0.383717	KIT/VEGFA	2
GO:0002730	GO:0002730	regulation of dendritic cell cytokine production	2/724	12/18866	0.0752504	0.418034	0.383717	NOD2/TICAM1	2
GO:0010232	GO:0010232	vascular transport	2/724	12/18866	0.0752504	0.418034	0.383717	ABCB1/SLC22A1	2
GO:0014831	GO:0014831	gastro-intestinal system smooth muscle contraction	2/724	12/18866	0.0752504	0.418034	0.383717	KIT/SPX	2
GO:0016188	GO:0016188	synaptic vesicle maturation	2/724	12/18866	0.0752504	0.418034	0.383717	DLG4/UNC13B	2
GO:0035630	GO:0035630	bone mineralization involved in bone maturation	2/724	12/18866	0.0752504	0.418034	0.383717	IGF1/LTF	2
GO:0038180	GO:0038180	nerve growth factor signaling pathway	2/724	12/18866	0.0752504	0.418034	0.383717	NTRK1/BDNF	2
GO:0042368	GO:0042368	vitamin D biosynthetic process	2/724	12/18866	0.0752504	0.418034	0.383717	SNAI1/CYP27A1	2
GO:0042492	GO:0042492	gamma-delta T cell differentiation	2/724	12/18866	0.0752504	0.418034	0.383717	EGR3/TCF7	2
GO:0045144	GO:0045144	meiotic sister chromatid segregation	2/724	12/18866	0.0752504	0.418034	0.383717	HORMAD1/MEIKIN	2
GO:0045161	GO:0045161	neuronal ion channel clustering	2/724	12/18866	0.0752504	0.418034	0.383717	GLDN/NRCAM	2
GO:0045760	GO:0045760	positive regulation of action potential	2/724	12/18866	0.0752504	0.418034	0.383717	ANK3/NOS1AP	2
GO:0051177	GO:0051177	meiotic sister chromatid cohesion	2/724	12/18866	0.0752504	0.418034	0.383717	HORMAD1/MEIKIN	2
GO:0051255	GO:0051255	spindle midzone assembly	2/724	12/18866	0.0752504	0.418034	0.383717	MAP10/AURKC	2
GO:0051657	GO:0051657	maintenance of organelle location	2/724	12/18866	0.0752504	0.418034	0.383717	AKAP9/ATP2A1	2
GO:0060442	GO:0060442	branching involved in prostate gland morphogenesis	2/724	12/18866	0.0752504	0.418034	0.383717	ESR1/FGFR2	2
GO:0060670	GO:0060670	branching involved in labyrinthine layer morphogenesis	2/724	12/18866	0.0752504	0.418034	0.383717	FGFR2/SOCS3	2
GO:0060736	GO:0060736	prostate gland growth	2/724	12/18866	0.0752504	0.418034	0.383717	ESR1/FGFR2	2
GO:0060742	GO:0060742	epithelial cell differentiation involved in prostate gland development	2/724	12/18866	0.0752504	0.418034	0.383717	FGFR2/WDR77	2
GO:0070243	GO:0070243	regulation of thymocyte apoptotic process	2/724	12/18866	0.0752504	0.418034	0.383717	ADAM8/RAG1	2
GO:0071340	GO:0071340	skeletal muscle acetylcholine-gated channel clustering	2/724	12/18866	0.0752504	0.418034	0.383717	CRKL/PTN	2
GO:0072537	GO:0072537	fibroblast activation	2/724	12/18866	0.0752504	0.418034	0.383717	AKAP12/MYB	2
GO:1903909	GO:1903909	regulation of receptor clustering	2/724	12/18866	0.0752504	0.418034	0.383717	CRKL/PTN	2
GO:1905522	GO:1905522	negative regulation of macrophage migration	2/724	12/18866	0.0752504	0.418034	0.383717	EMILIN1/STAP1	2
GO:2000105	GO:2000105	positive regulation of DNA-dependent DNA replication	2/724	12/18866	0.0752504	0.418034	0.383717	E2F7/FGFR1	2
GO:0001658	GO:0001658	branching involved in ureteric bud morphogenesis	5/724	59/18866	0.0754231	0.418034	0.383717	FAT4/GLI3/HNF1B/PBX1/VEGFA	5
GO:0006636	GO:0006636	unsaturated fatty acid biosynthetic process	5/724	59/18866	0.0754231	0.418034	0.383717	EDN1/ELOVL7/PTGS1/HPGD/ELOVL6	5
GO:0060113	GO:0060113	inner ear receptor cell differentiation	5/724	59/18866	0.0754231	0.418034	0.383717	CDH23/FGFR1/TPRN/FAT4/MCOLN3	5
GO:0071385	GO:0071385	cellular response to glucocorticoid stimulus	5/724	59/18866	0.0754231	0.418034	0.383717	DDIT4/EDN1/FOXO3/SMYD3/FBXO32	5
GO:0098930	GO:0098930	axonal transport	5/724	59/18866	0.0754231	0.418034	0.383717	AGBL4/MAP2/RAB27B/TRAK2/UCHL1	5
GO:0048545	GO:0048545	response to steroid hormone	19/724	346/18866	0.0755254	0.418034	0.383717	BAD/CAV1/CDKN1A/DDIT4/DEFA3/EDN1/ESR1/FOSB/FOXO3/PADI2/PER1/PTN/RBBP7/RNF14/SMYD3/TGFB1/ACTA1/FBXO32/PTGER2	19
GO:0001672	GO:0001672	regulation of chromatin assembly or disassembly	3/724	26/18866	0.0761063	0.418034	0.383717	PADI2/TLK1/TET1	3
GO:0001945	GO:0001945	lymph vessel development	3/724	26/18866	0.0761063	0.418034	0.383717	EPHA2/LGALS12/VEGFA	3
GO:0002347	GO:0002347	response to tumor cell	3/724	26/18866	0.0761063	0.418034	0.383717	CD226/RBMS3/CD160	3
GO:0035235	GO:0035235	ionotropic glutamate receptor signaling pathway	3/724	26/18866	0.0761063	0.418034	0.383717	GRIN2D/GRIN3A/PTK2B	3
GO:0035902	GO:0035902	response to immobilization stress	3/724	26/18866	0.0761063	0.418034	0.383717	FOXO3/PTK2B/TPH1	3
GO:0042730	GO:0042730	fibrinolysis	3/724	26/18866	0.0761063	0.418034	0.383717	GP1BA/PLG/KRT1	3
GO:0051654	GO:0051654	establishment of mitochondrion localization	3/724	26/18866	0.0761063	0.418034	0.383717	AGBL4/TRAK2/UCHL1	3
GO:0051873	GO:0051873	killing by host of symbiont cells	3/724	26/18866	0.0761063	0.418034	0.383717	CAMP/CTSG/ELANE	3
GO:0051875	GO:0051875	pigment granule localization	3/724	26/18866	0.0761063	0.418034	0.383717	RAB27A/RAB27B/MREG	3
GO:0055083	GO:0055083	monovalent inorganic anion homeostasis	3/724	26/18866	0.0761063	0.418034	0.383717	SLC12A1/CA12/ENPP1	3
GO:0060307	GO:0060307	regulation of ventricular cardiac muscle cell membrane repolarization	3/724	26/18866	0.0761063	0.418034	0.383717	AKAP9/KCNH2/NOS1AP	3
GO:0060561	GO:0060561	apoptotic process involved in morphogenesis	3/724	26/18866	0.0761063	0.418034	0.383717	BAK1/CRYAB/HNF1B	3
GO:0090023	GO:0090023	positive regulation of neutrophil chemotaxis	3/724	26/18866	0.0761063	0.418034	0.383717	CXCL8/DAPK2/EDN1	3
GO:1903010	GO:1903010	regulation of bone development	3/724	26/18866	0.0761063	0.418034	0.383717	LTF/TMEM119/GLI3	3
GO:0046006	GO:0046006	regulation of activated T cell proliferation	4/724	42/18866	0.0764122	0.418318	0.383978	CLC/IGF1/PDCD1LG2/TNFSF9	4
GO:0051602	GO:0051602	response to electrical stimulus	4/724	42/18866	0.0764122	0.418318	0.383978	AKAP12/AKAP9/GJB6/NTRK1	4
GO:1904037	GO:1904037	positive regulation of epithelial cell apoptotic process	4/724	42/18866	0.0764122	0.418318	0.383978	BAD/FOXO3/MIR101-1/CD160	4
GO:2001233	GO:2001233	regulation of apoptotic signaling pathway	22/724	413/18866	0.0766013	0.41889	0.384502	BAD/BAK1/CAV1/DAPK2/FGFR1/GATA1/IGF1/INHBA/MOAP1/PPP3CC/SKIL/SNAI1/TIMP3/TNFAIP3/TNFRSF12A/TPD52L1/TRADD/BDNF/BMPR1B/HRK/SCRT2/BIK	22
GO:0032640	GO:0032640	tumor necrosis factor production	8/724	116/18866	0.0780277	0.426218	0.391229	ANGPT1/BPI/IGF1/LTF/NOD2/TICAM1/TNFAIP3/CD34	8
GO:0061045	GO:0061045	negative regulation of wound healing	6/724	78/18866	0.0788732	0.43036	0.395031	EDN1/GP1BA/PLG/PRKG1/CD34/KRT1	6
GO:0048704	GO:0048704	embryonic skeletal system morphogenesis	7/724	97/18866	0.0792891	0.4312	0.395802	FGFR2/HOXA9/RUNX2/TFAP2A/ZEB1/GLI3/MMP16	7
GO:1990868	GO:1990868	response to chemokine	7/724	97/18866	0.0792891	0.4312	0.395802	ACKR2/CCRL2/CXCL8/EDN1/MPL/PADI2/PTK2B	7
GO:1990869	GO:1990869	cellular response to chemokine	7/724	97/18866	0.0792891	0.4312	0.395802	ACKR2/CCRL2/CXCL8/EDN1/MPL/PADI2/PTK2B	7
GO:0018208	GO:0018208	peptidyl-proline modification	5/724	60/18866	0.0798176	0.432645	0.397128	CRTAP/FKBP14/FKBP2/P4HA3/PPIG	5
GO:0050994	GO:0050994	regulation of lipid catabolic process	5/724	60/18866	0.0798176	0.432645	0.397128	GPLD1/HCAR2/LGALS12/ADORA1/HPGD	5
GO:0061098	GO:0061098	positive regulation of protein tyrosine kinase activity	5/724	60/18866	0.0798176	0.432645	0.397128	DLG4/ADORA1/BDNF/STAP1/EGF	5
GO:0000075	GO:0000075	cell cycle checkpoint	13/724	219/18866	0.0799668	0.432978	0.397434	CDKN1A/CDKN2B/DTL/E2F7/GADD45A/GTSE1/HORMAD1/NDC80/SETMAR/TGFB1/TRIP13/WEE1/ZWINT	13
GO:0030183	GO:0030183	B cell differentiation	9/724	137/18866	0.081407	0.436609	0.400767	BAD/BAK1/CD19/INHBA/ITM2A/KIT/NTRK1/PTK2B/RAG1	9
GO:0030517	GO:0030517	negative regulation of axon extension	4/724	43/18866	0.0818176	0.436609	0.400767	CDK5/MAP2/SEMA4D/SEMA6B	4
GO:0045823	GO:0045823	positive regulation of heart contraction	4/724	43/18866	0.0818176	0.436609	0.400767	EDN1/ATP2A1/NOS1AP/SLC1A1	4
GO:0050856	GO:0050856	regulation of T cell receptor signaling pathway	4/724	43/18866	0.0818176	0.436609	0.400767	CD226/TESPA1/TRAT1/CD160	4
GO:0060119	GO:0060119	inner ear receptor cell development	4/724	43/18866	0.0818176	0.436609	0.400767	CDH23/FGFR1/TPRN/FAT4	4
GO:1901659	GO:1901659	glycosyl compound biosynthetic process	4/724	43/18866	0.0818176	0.436609	0.400767	ADAL/CDA/GMPS/MTAP	4
GO:0051897	GO:0051897	positive regulation of protein kinase B signaling	11/724	178/18866	0.0818927	0.436609	0.400767	ADAM8/ANGPT1/CD19/ESR1/FGFR1/FGFR2/KIT/MFHAS1/TGFB1/TRAT1/EGF	11
GO:0070372	GO:0070372	regulation of ERK1 and ERK2 cascade	17/724	306/18866	0.0821011	0.436609	0.400767	AKAP12/ANGPT1/ARHGAP8/CRKL/EPHA2/FAM83D/FGFR2/MFHAS1/NOD2/NTRK1/PDGFC/PTK2B/TGFB1/TIMP3/WNK2/EMILIN1/FFAR4	17
GO:0019933	GO:0019933	cAMP-mediated signaling	12/724	199/18866	0.0823078	0.436609	0.400767	ADGRE3/ADGRG1/ADGRG5/ADGRL2/DGKQ/OPRL1/RAMP1/RNF157/S1PR3/ADGRL3/FFAR4/PTGER2	12
GO:0099504	GO:0099504	synaptic vesicle cycle	12/724	199/18866	0.0823078	0.436609	0.400767	CDK5/DGKQ/GRIN3A/PCDH17/PLAA/PPP3CC/PREPL/RAB27B/RIMS3/SYT1/UNC13B/SLC18A2	12
GO:0006835	GO:0006835	dicarboxylic acid transport	7/724	98/18866	0.0827207	0.436609	0.400767	PER2/SLC25A22/SYT1/UNC13B/ADORA1/BDNF/SLC1A1	7
GO:0006809	GO:0006809	nitric oxide biosynthetic process	6/724	79/18866	0.0827392	0.436609	0.400767	CAV1/EDN1/PTK2B/TICAM1/CD34/NOS1AP	6
GO:0043462	GO:0043462	regulation of ATPase activity	6/724	79/18866	0.0827392	0.436609	0.400767	DNAJB11/LTF/PXK/SETMAR/TNNC1/UHRF1	6
GO:0043536	GO:0043536	positive regulation of blood vessel endothelial cell migration	6/724	79/18866	0.0827392	0.436609	0.400767	ANGPT1/FGFR1/GATA2/MIR101-1/TGFB1/VEGFA	6
GO:0050000	GO:0050000	chromosome localization	6/724	79/18866	0.0827392	0.436609	0.400767	CDCA8/FAM83D/KIF14/KPNB1/NDC80/GEM	6
GO:0051303	GO:0051303	establishment of chromosome localization	6/724	79/18866	0.0827392	0.436609	0.400767	CDCA8/FAM83D/KIF14/KPNB1/NDC80/GEM	6
GO:0007187	GO:0007187	G protein-coupled receptor signaling pathway, coupled to cyclic nucleotide second messenger	15/724	263/18866	0.0827953	0.436609	0.400767	ADGRE3/ADGRG1/ADGRG5/ADGRL2/AKAP12/EDN1/OPRL1/PTGDR2/PTH2R/RAMP1/S1PR3/ADGRL3/ADORA1/GPR176/PTGER2	15
GO:0009306	GO:0009306	protein secretion	24/724	462/18866	0.0829347	0.436609	0.400767	ACHE/ADAM8/BAD/DISP1/DMTN/DPP4/GPLD1/HCAR2/IGF1/MIDN/NOD2/PANX1/PER2/RAB13/S100A12/SLC2A1/TGFB1/UNC13B/CD34/CLEC4E/FFAR4/HNF1B/KCNS3/SYTL4	24
GO:0001556	GO:0001556	oocyte maturation	3/724	27/18866	0.0832819	0.436609	0.400767	FOXO3/PTK2B/TRIP13	3
GO:0001702	GO:0001702	gastrulation with mouth forming second	3/724	27/18866	0.0832819	0.436609	0.400767	CHRD/CRB2/TENM4	3
GO:2000353	GO:2000353	positive regulation of endothelial cell apoptotic process	3/724	27/18866	0.0832819	0.436609	0.400767	FOXO3/MIR101-1/CD160	3
GO:1902903	GO:1902903	regulation of supramolecular fiber organization	20/724	373/18866	0.0838034	0.436609	0.400767	AKAP9/ARHGAP35/CRYAB/DMTN/EDN1/EML2/ESAM/HCK/MAP2/NCKAP1/PPP1R9A/PTK2B/RASA1/SLAIN2/TMOD2/WHAMM/EMILIN1/TENM1/NAV3/SHANK3	20
GO:0033559	GO:0033559	unsaturated fatty acid metabolic process	8/724	118/18866	0.0842391	0.436609	0.400767	ACOT8/EDN1/ELOVL7/PLAA/PTGS1/FAAH2/HPGD/ELOVL6	8
GO:0002705	GO:0002705	positive regulation of leukocyte mediated immunity	9/724	138/18866	0.0842936	0.436609	0.400767	CD1E/CD226/CLNK/GATA2/NOD2/TGFB1/TICAM1/CD160/STAP1	9
GO:0033865	GO:0033865	nucleoside bisphosphate metabolic process	9/724	138/18866	0.0842936	0.436609	0.400767	ACOT7/ACOT8/ACSM1/ACSM3/DBI/ELOVL7/HACD1/ELOVL6/ENPP1	9
GO:0033875	GO:0033875	ribonucleoside bisphosphate metabolic process	9/724	138/18866	0.0842936	0.436609	0.400767	ACOT7/ACOT8/ACSM1/ACSM3/DBI/ELOVL7/HACD1/ELOVL6/ENPP1	9
GO:0034032	GO:0034032	purine nucleoside bisphosphate metabolic process	9/724	138/18866	0.0842936	0.436609	0.400767	ACOT7/ACOT8/ACSM1/ACSM3/DBI/ELOVL7/HACD1/ELOVL6/ENPP1	9
GO:0016266	GO:0016266	O-glycan processing	5/724	61/18866	0.084346	0.436609	0.400767	B4GALT5/GCNT4/ST3GAL3/ST3GAL4/ST6GALNAC2	5
GO:0031343	GO:0031343	positive regulation of cell killing	5/724	61/18866	0.084346	0.436609	0.400767	BAD/CD1E/CD226/CD160/STAP1	5
GO:0045576	GO:0045576	mast cell activation	5/724	61/18866	0.084346	0.436609	0.400767	CD226/GATA2/KIT/RHOH/S100A12	5
GO:0035592	GO:0035592	establishment of protein localization to extracellular region	24/724	463/18866	0.0844623	0.436609	0.400767	ACHE/ADAM8/BAD/DISP1/DMTN/DPP4/GPLD1/HCAR2/IGF1/MIDN/NOD2/PANX1/PER2/RAB13/S100A12/SLC2A1/TGFB1/UNC13B/CD34/CLEC4E/FFAR4/HNF1B/KCNS3/SYTL4	24
GO:1901888	GO:1901888	regulation of cell junction assembly	12/724	200/18866	0.0846813	0.436609	0.400767	CAV1/DLG5/DMTN/EPHA2/NTRK1/PPP1R9A/PRKCH/SEMA4D/SNAI1/ADGRL3/BDNF/VEGFA	12
GO:0010959	GO:0010959	regulation of metal ion transport	21/724	396/18866	0.0850492	0.436609	0.400767	AKAP9/BAK1/CAV1/CD19/CDK5/HFE/KCNH2/KCNMB1/OPRL1/PCSK9/PER1/PKP2/PTK2B/TRPC6/WNK2/ADORA1/ANK3/ATP2A1/NOS1AP/EGF/GEM	21
GO:0050708	GO:0050708	regulation of protein secretion	19/724	352/18866	0.0858455	0.436609	0.400767	ACHE/ADAM8/BAD/DISP1/DPP4/GPLD1/HCAR2/IGF1/MIDN/PANX1/PER2/SLC2A1/TGFB1/UNC13B/CD34/CLEC4E/FFAR4/KCNS3/SYTL4	19
GO:0051092	GO:0051092	positive regulation of NF-kappaB transcription factor activity	10/724	159/18866	0.0861188	0.436609	0.400767	ADAM8/CAV1/LTF/NOD2/NTRK1/PRKCH/PRKCQ/S100A12/TICAM1/TRADD	10
GO:0043255	GO:0043255	regulation of carbohydrate biosynthetic process	7/724	99/18866	0.0862365	0.436609	0.400767	DGKQ/IGF1/PTK2B/SDHAF3/TGFB1/EGF/ENPP1	7
GO:0062207	GO:0062207	regulation of pattern recognition receptor signaling pathway	7/724	99/18866	0.0862365	0.436609	0.400767	CAV1/ESR1/LTF/MFHAS1/TICAM1/TNFAIP3/TSPAN6	7
GO:0097529	GO:0097529	myeloid leukocyte migration	13/724	222/18866	0.0867049	0.436609	0.400767	ADAM8/CXCL8/DAPK2/DPP4/EDN1/EPX/KIT/PTK2B/RHOH/S100A12/EMILIN1/STAP1/VEGFA	13
GO:0031397	GO:0031397	negative regulation of protein ubiquitination	6/724	80/18866	0.0867087	0.436609	0.400767	CAV1/CDK5/MIR101-1/PER2/PLAA/TNFAIP3	6
GO:0055021	GO:0055021	regulation of cardiac muscle tissue growth	6/724	80/18866	0.0867087	0.436609	0.400767	EDN1/FGFR1/FGFR2/IGF1/MAPK11/TGFBR3	6
GO:2000300	GO:2000300	regulation of synaptic vesicle exocytosis	6/724	80/18866	0.0867087	0.436609	0.400767	CDK5/GRIN3A/PREPL/RIMS3/SYT1/UNC13B	6
GO:0002836	GO:0002836	positive regulation of response to tumor cell	2/724	13/18866	0.0867382	0.436609	0.400767	CD226/CD160	2
GO:0002839	GO:0002839	positive regulation of immune response to tumor cell	2/724	13/18866	0.0867382	0.436609	0.400767	CD226/CD160	2
GO:0003084	GO:0003084	positive regulation of systemic arterial blood pressure	2/724	13/18866	0.0867382	0.436609	0.400767	SPX/ADORA1	2
GO:0005513	GO:0005513	detection of calcium ion	2/724	13/18866	0.0867382	0.436609	0.400767	KCNMB1/SYT1	2
GO:0007183	GO:0007183	SMAD protein complex assembly	2/724	13/18866	0.0867382	0.436609	0.400767	TGFB1/EID2	2
GO:0009143	GO:0009143	nucleoside triphosphate catabolic process	2/724	13/18866	0.0867382	0.436609	0.400767	SMPDL3A/ENPP1	2
GO:0015697	GO:0015697	quaternary ammonium group transport	2/724	13/18866	0.0867382	0.436609	0.400767	SLC25A20/SLC22A1	2
GO:0015791	GO:0015791	polyol transport	2/724	13/18866	0.0867382	0.436609	0.400767	AQP11/AQP9	2
GO:0016264	GO:0016264	gap junction assembly	2/724	13/18866	0.0867382	0.436609	0.400767	CAV1/GJB6	2
GO:0031115	GO:0031115	negative regulation of microtubule polymerization	2/724	13/18866	0.0867382	0.436609	0.400767	EML2/MAP2	2
GO:0031665	GO:0031665	negative regulation of lipopolysaccharide-mediated signaling pathway	2/724	13/18866	0.0867382	0.436609	0.400767	LTF/TNFAIP3	2
GO:0031953	GO:0031953	negative regulation of protein autophosphorylation	2/724	13/18866	0.0867382	0.436609	0.400767	CAV1/ENPP1	2
GO:0034144	GO:0034144	negative regulation of toll-like receptor 4 signaling pathway	2/724	13/18866	0.0867382	0.436609	0.400767	MFHAS1/TNFAIP3	2
GO:0035641	GO:0035641	locomotory exploration behavior	2/724	13/18866	0.0867382	0.436609	0.400767	DLG4/DPP4	2
GO:0042308	GO:0042308	negative regulation of protein import into nucleus	2/724	13/18866	0.0867382	0.436609	0.400767	ANGPT1/PKIA	2
GO:0045741	GO:0045741	positive regulation of epidermal growth factor-activated receptor activity	2/724	13/18866	0.0867382	0.436609	0.400767	ADORA1/EGF	2
GO:0051386	GO:0051386	regulation of neurotrophin TRK receptor signaling pathway	2/724	13/18866	0.0867382	0.436609	0.400767	PPP2R5B/DOK5	2
GO:0060100	GO:0060100	positive regulation of phagocytosis, engulfment	2/724	13/18866	0.0867382	0.436609	0.400767	GATA2/STAP1	2
GO:0061029	GO:0061029	eyelid development in camera-type eye	2/724	13/18866	0.0867382	0.436609	0.400767	INHBA/TFAP2A	2
GO:0072578	GO:0072578	neurotransmitter-gated ion channel clustering	2/724	13/18866	0.0867382	0.436609	0.400767	DLG4/SHANK3	2
GO:0097531	GO:0097531	mast cell migration	2/724	13/18866	0.0867382	0.436609	0.400767	KIT/VEGFA	2
GO:0098712	GO:0098712	L-glutamate import across plasma membrane	2/724	13/18866	0.0867382	0.436609	0.400767	PER2/SLC1A1	2
GO:0098903	GO:0098903	regulation of membrane repolarization during action potential	2/724	13/18866	0.0867382	0.436609	0.400767	CAV1/NOS1AP	2
GO:0098974	GO:0098974	postsynaptic actin cytoskeleton organization	2/724	13/18866	0.0867382	0.436609	0.400767	PPP1R9A/NOS1AP	2
GO:1900103	GO:1900103	positive regulation of endoplasmic reticulum unfolded protein response	2/724	13/18866	0.0867382	0.436609	0.400767	BAK1/ERN1	2
GO:1903236	GO:1903236	regulation of leukocyte tethering or rolling	2/724	13/18866	0.0867382	0.436609	0.400767	SELP/ELANE	2
GO:1904590	GO:1904590	negative regulation of protein import	2/724	13/18866	0.0867382	0.436609	0.400767	ANGPT1/PKIA	2
GO:1905155	GO:1905155	positive regulation of membrane invagination	2/724	13/18866	0.0867382	0.436609	0.400767	GATA2/STAP1	2
GO:0032881	GO:0032881	regulation of polysaccharide metabolic process	4/724	44/18866	0.0874062	0.439076	0.403032	IGF1/TGFB1/EGF/ENPP1	4
GO:0048489	GO:0048489	synaptic vesicle transport	4/724	44/18866	0.0874062	0.439076	0.403032	CDK5/LIN7A/MAP2/RAB27A	4
GO:0032147	GO:0032147	activation of protein kinase activity	18/724	331/18866	0.087851	0.440862	0.404671	ANGPT1/CRKL/DGKQ/ERN1/GADD45A/IGF1/KIF14/KIT/MAPK11/NOD2/NTRK1/PDGFC/PTK2B/TDGF1/ADORA1/CARD10/VEGFA/EGF	18
GO:0048488	GO:0048488	synaptic vesicle endocytosis	5/724	62/18866	0.0890069	0.444854	0.408335	CDK5/DGKQ/PPP3CC/RAB27B/SYT1	5
GO:0060997	GO:0060997	dendritic spine morphogenesis	5/724	62/18866	0.0890069	0.444854	0.408335	CDK5/DLG4/PPP1R9A/SIPA1L1/SHANK3	5
GO:0071384	GO:0071384	cellular response to corticosteroid stimulus	5/724	62/18866	0.0890069	0.444854	0.408335	DDIT4/EDN1/FOXO3/SMYD3/FBXO32	5
GO:0140238	GO:0140238	presynaptic endocytosis	5/724	62/18866	0.0890069	0.444854	0.408335	CDK5/DGKQ/PPP3CC/RAB27B/SYT1	5
GO:0007179	GO:0007179	transforming growth factor beta receptor signaling pathway	12/724	202/18866	0.0895556	0.447104	0.4104	BAMBI/CAV1/CDKN2B/CITED2/SKIL/TGFB1/TGFBR3/ZEB1/EID2/EMILIN1/HPGD/HTRA4	12
GO:0034765	GO:0034765	regulation of ion transmembrane transport	25/724	489/18866	0.089638	0.447104	0.4104	ABCB1/AKAP9/CAV1/CD19/CDK5/DLG4/KCNH2/KCNK13/KCNMB1/OPRL1/PCSK9/PER2/PTK2B/SLC6A9/TRPC6/WNK2/ANK3/ATP2A1/CNIH3/KCNQ5/NOS1AP/GEM/KCNJ16/KCNS3/SHANK3	25
GO:0060048	GO:0060048	cardiac muscle contraction	9/724	140/18866	0.0902487	0.448725	0.411888	AKAP9/CAV1/KCNH2/PKP2/PPP1R13L/TNNC1/ADORA1/ATP2A1/NOS1AP	9
GO:0051588	GO:0051588	regulation of neurotransmitter transport	8/724	120/18866	0.0907327	0.448725	0.411888	CDK5/GRIN3A/PER2/PPP1R9A/PREPL/RIMS3/SYT1/UNC13B	8
GO:0002335	GO:0002335	mature B cell differentiation	3/724	28/18866	0.090735	0.448725	0.411888	CD19/ITM2A/PTK2B	3
GO:0030194	GO:0030194	positive regulation of blood coagulation	3/724	28/18866	0.090735	0.448725	0.411888	DMTN/PLG/SELP	3
GO:0042044	GO:0042044	fluid transport	3/724	28/18866	0.090735	0.448725	0.411888	AQP11/AQP9/EDN1	3
GO:0051590	GO:0051590	positive regulation of neurotransmitter transport	3/724	28/18866	0.090735	0.448725	0.411888	CDK5/SYT1/UNC13B	3
GO:1900048	GO:1900048	positive regulation of hemostasis	3/724	28/18866	0.090735	0.448725	0.411888	DMTN/PLG/SELP	3
GO:2000463	GO:2000463	positive regulation of excitatory postsynaptic potential	3/724	28/18866	0.090735	0.448725	0.411888	DLG4/PTK2B/SHANK3	3
GO:0021766	GO:0021766	hippocampus development	6/724	81/18866	0.0907809	0.448725	0.411888	CDK5/CRKL/EIF2B5/KIF14/DCLK2/GLI3	6
GO:0071216	GO:0071216	cellular response to biotic stimulus	14/724	246/18866	0.0926238	0.45203	0.414922	BPI/CTSG/CXCL8/DEFA3/DEFA4/HCK/LTF/NOD2/PDCD1LG2/PLAA/TGFB1/TICAM1/TNFAIP3/STAP1	14
GO:0072330	GO:0072330	monocarboxylic acid biosynthetic process	14/724	246/18866	0.0926238	0.45203	0.414922	ACOT7/ACOT8/ACSM1/ACSM3/EDN1/ELOVL7/HACD1/OSBPL6/PER2/PTGS1/CYP27A1/DSEL/HPGD/ELOVL6	14
GO:0002715	GO:0002715	regulation of natural killer cell mediated immunity	4/724	45/18866	0.0931743	0.45203	0.414922	CD226/CLNK/PIK3R6/CD160	4
GO:0006775	GO:0006775	fat-soluble vitamin metabolic process	4/724	45/18866	0.0931743	0.45203	0.414922	FGFR1/SNAI1/VKORC1/CYP27A1	4
GO:0035094	GO:0035094	response to nicotine	4/724	45/18866	0.0931743	0.45203	0.414922	BAD/EDN1/NTRK1/LYPD1	4
GO:0043090	GO:0043090	amino acid import	4/724	45/18866	0.0931743	0.45203	0.414922	PER2/SLC16A2/SLC6A9/SLC1A1	4
GO:0045429	GO:0045429	positive regulation of nitric oxide biosynthetic process	4/724	45/18866	0.0931743	0.45203	0.414922	EDN1/PTK2B/TICAM1/NOS1AP	4
GO:0098815	GO:0098815	modulation of excitatory postsynaptic potential	4/724	45/18866	0.0931743	0.45203	0.414922	DLG4/PTK2B/SLC8A2/SHANK3	4
GO:0007215	GO:0007215	glutamate receptor signaling pathway	7/724	101/18866	0.0935193	0.45203	0.414922	DLG4/GRIN2D/GRIN3A/PTK2B/SLC6A9/CNIH3/SHANK3	7
GO:0045639	GO:0045639	positive regulation of myeloid cell differentiation	7/724	101/18866	0.0935193	0.45203	0.414922	FOXO3/GATA1/GATA2/INHBA/KLF10/MPL/TGFB1	7
GO:0045665	GO:0045665	negative regulation of neuron differentiation	13/724	225/18866	0.0937889	0.45203	0.414922	CDK5/FOXO3/MAP2/PMP22/SEMA4D/SEMA6B/SPOCK1/TBX6/TRAK2/TRPC5/TRPC6/GLI3/PBX1	13
GO:0046622	GO:0046622	positive regulation of organ growth	5/724	63/18866	0.0937987	0.45203	0.414922	EDN1/FGFR1/FGFR2/IGF1/TGFBR3	5
GO:0055008	GO:0055008	cardiac muscle tissue morphogenesis	5/724	63/18866	0.0937987	0.45203	0.414922	FGFR2/PKP2/TGFB1/TGFBR3/TNNC1	5
GO:0070059	GO:0070059	intrinsic apoptotic signaling pathway in response to endoplasmic reticulum stress	5/724	63/18866	0.0937987	0.45203	0.414922	BAK1/CHAC1/ERN1/TMEM117/ATP2A1	5
GO:0060249	GO:0060249	anatomical structure homeostasis	24/724	469/18866	0.0940228	0.45203	0.414922	ADAM8/ANGPT1/CDH23/CDK5/ESAM/GATA1/GATA2/GJB6/LTF/MTF1/NOD2/PLG/PRKCQ/PTK2B/SLC2A1/SLC8A2/TMEM119/TNFAIP3/ADORA1/CD34/KRT1/MAPK15/SLC1A1/VEGFA	24
GO:0002065	GO:0002065	columnar/cuboidal epithelial cell differentiation	8/724	121/18866	0.0940849	0.45203	0.414922	B9D1/BAD/CDKN1A/FGFR1/FGFR2/TPRN/WDR77/MCOLN3	8
GO:0032612	GO:0032612	interleukin-1 production	8/724	121/18866	0.0940849	0.45203	0.414922	IGF1/MEFV/MIR101-1/NOD2/PANX1/S1PR3/TNFAIP3/FFAR4	8
GO:0007051	GO:0007051	spindle organization	11/724	183/18866	0.0949255	0.45203	0.414922	AUNIP/CEP192/HAUS5/KPNB1/MAP10/MYBL2/NDC80/TACC2/AURKC/MAPK15/TUBB1	11
GO:0045652	GO:0045652	regulation of megakaryocyte differentiation	6/724	82/18866	0.0949552	0.45203	0.414922	GATA1/GATA2/GP1BA/ITGA2B/PRKCQ/NFE2	6
GO:0071692	GO:0071692	protein localization to extracellular region	24/724	470/18866	0.0956823	0.45203	0.414922	ACHE/ADAM8/BAD/DISP1/DMTN/DPP4/GPLD1/HCAR2/IGF1/MIDN/NOD2/PANX1/PER2/RAB13/S100A12/SLC2A1/TGFB1/UNC13B/CD34/CLEC4E/FFAR4/HNF1B/KCNS3/SYTL4	24
GO:0046425	GO:0046425	regulation of receptor signaling pathway via JAK-STAT	9/724	142/18866	0.0964457	0.45203	0.414922	CAV1/CDK5/GADD45A/IGF1/KIT/PTK2B/SOCS3/IL22RA2/EGF	9
GO:0000079	GO:0000079	regulation of cyclin-dependent protein serine/threonine kinase activity	7/724	102/18866	0.0972854	0.45203	0.414922	CDKN1A/CDKN2B/CDKN3/CKS2/GADD45A/TNFAIP3/CCNA1	7
GO:0055024	GO:0055024	regulation of cardiac muscle tissue development	7/724	102/18866	0.0972854	0.45203	0.414922	EDN1/FGFR1/FGFR2/IGF1/MAPK11/TGFB1/TGFBR3	7
GO:0010811	GO:0010811	positive regulation of cell-substrate adhesion	8/724	122/18866	0.097507	0.45203	0.414922	CRKL/DMTN/EDIL3/PTK2B/PTN/COL8A1/EMILIN1/VEGFA	8
GO:0097237	GO:0097237	cellular response to toxic substance	8/724	122/18866	0.097507	0.45203	0.414922	EPX/HBD/HP/LPO/PPP1R9A/PTGS1/PXDNL/GSTO2	8
GO:0051091	GO:0051091	positive regulation of DNA-binding transcription factor activity	15/724	270/18866	0.097842	0.45203	0.414922	ADAM8/CAV1/EDN1/ESR1/KIT/LTF/NOD2/NTRK1/PPP2R5B/PRKCH/PRKCQ/S100A12/TICAM1/TRADD/VEGFA	15
GO:0001958	GO:0001958	endochondral ossification	3/724	29/18866	0.0984542	0.45203	0.414922	RUNX2/TMEM119/MMP16	3
GO:0002717	GO:0002717	positive regulation of natural killer cell mediated immunity	3/724	29/18866	0.0984542	0.45203	0.414922	CD226/CLNK/CD160	3
GO:0007263	GO:0007263	nitric oxide mediated signal transduction	3/724	29/18866	0.0984542	0.45203	0.414922	GUCY1A2/NOS1AP/VEGFA	3
GO:0008209	GO:0008209	androgen metabolic process	3/724	29/18866	0.0984542	0.45203	0.414922	ESR1/HSD17B6/PLEKHA1	3
GO:0036075	GO:0036075	replacement ossification	3/724	29/18866	0.0984542	0.45203	0.414922	RUNX2/TMEM119/MMP16	3
GO:0042634	GO:0042634	regulation of hair cycle	3/724	29/18866	0.0984542	0.45203	0.414922	PER1/TRADD/EPS8L3	3
GO:0048261	GO:0048261	negative regulation of receptor-mediated endocytosis	3/724	29/18866	0.0984542	0.45203	0.414922	DLG4/PCSK9/WDR54	3
GO:0050820	GO:0050820	positive regulation of coagulation	3/724	29/18866	0.0984542	0.45203	0.414922	DMTN/PLG/SELP	3
GO:0050901	GO:0050901	leukocyte tethering or rolling	3/724	29/18866	0.0984542	0.45203	0.414922	ITGB7/SELP/ELANE	3
GO:0071624	GO:0071624	positive regulation of granulocyte chemotaxis	3/724	29/18866	0.0984542	0.45203	0.414922	CXCL8/DAPK2/EDN1	3
GO:2000727	GO:2000727	positive regulation of cardiac muscle cell differentiation	3/724	29/18866	0.0984542	0.45203	0.414922	EDN1/IGF1/TGFB1	3
GO:2001032	GO:2001032	regulation of double-strand break repair via nonhomologous end joining	3/724	29/18866	0.0984542	0.45203	0.414922	AUNIP/KDM4D/SETMAR	3
GO:0002475	GO:0002475	antigen processing and presentation via MHC class Ib	2/724	14/18866	0.0987067	0.45203	0.414922	CD1E/TAP2	2
GO:0007135	GO:0007135	meiosis II	2/724	14/18866	0.0987067	0.45203	0.414922	HORMAD1/MEIKIN	2
GO:0010248	GO:0010248	establishment or maintenance of transmembrane electrochemical gradient	2/724	14/18866	0.0987067	0.45203	0.414922	BAK1/SLC22A1	2
GO:0010649	GO:0010649	regulation of cell communication by electrical coupling	2/724	14/18866	0.0987067	0.45203	0.414922	CAV1/ANK3	2
GO:0018410	GO:0018410	C-terminal protein amino acid modification	2/724	14/18866	0.0987067	0.45203	0.414922	AGBL4/GPLD1	2
GO:0030213	GO:0030213	hyaluronan biosynthetic process	2/724	14/18866	0.0987067	0.45203	0.414922	TGFB1/EGF	2
GO:0034392	GO:0034392	negative regulation of smooth muscle cell apoptotic process	2/724	14/18866	0.0987067	0.45203	0.414922	EDN1/IGF1	2
GO:0035815	GO:0035815	positive regulation of renal sodium excretion	2/724	14/18866	0.0987067	0.45203	0.414922	EDN1/NPPB	2
GO:0042659	GO:0042659	regulation of cell fate specification	2/724	14/18866	0.0987067	0.45203	0.414922	FGFR1/LMO4	2
GO:0046512	GO:0046512	sphingosine biosynthetic process	2/724	14/18866	0.0987067	0.45203	0.414922	SPTLC1/ACER2	2
GO:0046520	GO:0046520	sphingoid biosynthetic process	2/724	14/18866	0.0987067	0.45203	0.414922	SPTLC1/ACER2	2
GO:0047484	GO:0047484	regulation of response to osmotic stress	2/724	14/18866	0.0987067	0.45203	0.414922	ABCB1/BAD	2
GO:0050872	GO:0050872	white fat cell differentiation	2/724	14/18866	0.0987067	0.45203	0.414922	PER2/FFAR4	2
GO:0050930	GO:0050930	induction of positive chemotaxis	2/724	14/18866	0.0987067	0.45203	0.414922	CXCL8/VEGFA	2
GO:0051938	GO:0051938	L-glutamate import	2/724	14/18866	0.0987067	0.45203	0.414922	PER2/SLC1A1	2
GO:0055064	GO:0055064	chloride ion homeostasis	2/724	14/18866	0.0987067	0.45203	0.414922	SLC12A1/CA12	2
GO:0060452	GO:0060452	positive regulation of cardiac muscle contraction	2/724	14/18866	0.0987067	0.45203	0.414922	ATP2A1/NOS1AP	2
GO:0061051	GO:0061051	positive regulation of cell growth involved in cardiac muscle cell development	2/724	14/18866	0.0987067	0.45203	0.414922	EDN1/IGF1	2
GO:0061983	GO:0061983	meiosis II cell cycle process	2/724	14/18866	0.0987067	0.45203	0.414922	HORMAD1/MEIKIN	2
GO:0070431	GO:0070431	nucleotide-binding oligomerization domain containing 2 signaling pathway	2/724	14/18866	0.0987067	0.45203	0.414922	NOD2/TNFAIP3	2
GO:0097154	GO:0097154	GABAergic neuron differentiation	2/724	14/18866	0.0987067	0.45203	0.414922	GATA2/INHBA	2
GO:0098814	GO:0098814	spontaneous synaptic transmission	2/724	14/18866	0.0987067	0.45203	0.414922	PPP1R9A/SYT1	2
GO:0099550	GO:0099550	trans-synaptic signaling, modulating synaptic transmission	2/724	14/18866	0.0987067	0.45203	0.414922	PLG/BDNF	2
GO:1900044	GO:1900044	regulation of protein K63-linked ubiquitination	2/724	14/18866	0.0987067	0.45203	0.414922	NOD2/PLAA	2
GO:1901160	GO:1901160	primary amino compound metabolic process	2/724	14/18866	0.0987067	0.45203	0.414922	TPH1/AGMAT	2
GO:1901386	GO:1901386	negative regulation of voltage-gated calcium channel activity	2/724	14/18866	0.0987067	0.45203	0.414922	OPRL1/GEM	2
GO:1901569	GO:1901569	fatty acid derivative catabolic process	2/724	14/18866	0.0987067	0.45203	0.414922	ACOT7/HPGD	2
GO:1901626	GO:1901626	regulation of postsynaptic membrane organization	2/724	14/18866	0.0987067	0.45203	0.414922	CRKL/PTN	2
GO:1901678	GO:1901678	iron coordination entity transport	2/724	14/18866	0.0987067	0.45203	0.414922	FLVCR2/LTF	2
GO:1901841	GO:1901841	regulation of high voltage-gated calcium channel activity	2/724	14/18866	0.0987067	0.45203	0.414922	NOS1AP/GEM	2
GO:1902101	GO:1902101	positive regulation of metaphase/anaphase transition of cell cycle	2/724	14/18866	0.0987067	0.45203	0.414922	CDC16/MAPK15	2
GO:1903799	GO:1903799	negative regulation of production of miRNAs involved in gene silencing by miRNA	2/724	14/18866	0.0987067	0.45203	0.414922	ESR1/TGFB1	2
GO:1900449	GO:1900449	regulation of glutamate receptor signaling pathway	5/724	64/18866	0.0987197	0.45203	0.414922	DLG4/PTK2B/SLC6A9/CNIH3/SHANK3	5
GO:2000401	GO:2000401	regulation of lymphocyte migration	5/724	64/18866	0.0987197	0.45203	0.414922	ADAM8/CRKL/GCSAML/PADI2/PTK2B	5
GO:0007178	GO:0007178	transmembrane receptor protein serine/threonine kinase signaling pathway	19/724	359/18866	0.0990007	0.45203	0.414922	BAMBI/CAV1/CDKN2B/CHRD/CITED2/CRB2/HFE/INHBA/RUNX2/SKIL/TDGF1/TGFB1/TGFBR3/ZEB1/BMPR1B/EID2/EMILIN1/HPGD/HTRA4	19
GO:0005978	GO:0005978	glycogen biosynthetic process	4/724	46/18866	0.0991179	0.45203	0.414922	GBE1/IGF1/PER2/ENPP1	4
GO:0009250	GO:0009250	glucan biosynthetic process	4/724	46/18866	0.0991179	0.45203	0.414922	GBE1/IGF1/PER2/ENPP1	4
GO:0010863	GO:0010863	positive regulation of phospholipase C activity	4/724	46/18866	0.0991179	0.45203	0.414922	ESR1/FGFR1/KIT/BDNF	4
GO:0035987	GO:0035987	endodermal cell differentiation	4/724	46/18866	0.0991179	0.45203	0.414922	COL6A1/INHBA/COL8A1/HNF1B	4
GO:0048538	GO:0048538	thymus development	4/724	46/18866	0.0991179	0.45203	0.414922	CRKL/LMO4/PBX1/RAG1	4
GO:0050798	GO:0050798	activated T cell proliferation	4/724	46/18866	0.0991179	0.45203	0.414922	CLC/IGF1/PDCD1LG2/TNFSF9	4
GO:0051489	GO:0051489	regulation of filopodium assembly	4/724	46/18866	0.0991179	0.45203	0.414922	DMTN/PPP1R9A/TENM2/TENM1	4
GO:0051646	GO:0051646	mitochondrion localization	4/724	46/18866	0.0991179	0.45203	0.414922	AGBL4/TRAK2/UCHL1/ATP2A1	4
GO:1900744	GO:1900744	regulation of p38MAPK cascade	4/724	46/18866	0.0991179	0.45203	0.414922	GADD45A/MFHAS1/PER1/VEGFA	4
GO:1904407	GO:1904407	positive regulation of nitric oxide metabolic process	4/724	46/18866	0.0991179	0.45203	0.414922	EDN1/PTK2B/TICAM1/NOS1AP	4
GO:0014855	GO:0014855	striated muscle cell proliferation	6/724	83/18866	0.0992306	0.45203	0.414922	ANGPT1/FGFR1/FGFR2/MAPK11/TGFBR3/TENM4	6
GO:0055117	GO:0055117	regulation of cardiac muscle contraction	6/724	83/18866	0.0992306	0.45203	0.414922	AKAP9/CAV1/PKP2/ADORA1/ATP2A1/NOS1AP	6
GO:2001257	GO:2001257	regulation of cation channel activity	11/724	185/18866	0.100468	0.456944	0.419433	CAV1/CDK5/DLG4/OPRL1/PTK2B/SLC6A9/ANK3/CNIH3/NOS1AP/GEM/SHANK3	11
GO:0007259	GO:0007259	receptor signaling pathway via JAK-STAT	10/724	164/18866	0.100494	0.456944	0.419433	CAV1/CDK5/GADD45A/IGF1/KIT/PTK2B/SOCS3/IL22RA2/EGF/STAT4	10
GO:0042471	GO:0042471	ear morphogenesis	8/724	123/18866	0.100999	0.457326	0.419783	EDN1/FGFR1/FGFR2/GATA2/GJB6/TFAP2A/TPRN/ZEB1	8
GO:0002042	GO:0002042	cell migration involved in sprouting angiogenesis	7/724	103/18866	0.101134	0.457326	0.419783	EGR3/GATA2/GPLD1/MIR101-1/TDGF1/CARD10/VEGFA	7
GO:0034766	GO:0034766	negative regulation of ion transmembrane transport	7/724	103/18866	0.101134	0.457326	0.419783	CAV1/KCNH2/OPRL1/PCSK9/SLC6A9/ANK3/GEM	7
GO:0048661	GO:0048661	positive regulation of smooth muscle cell proliferation	7/724	103/18866	0.101134	0.457326	0.419783	EDN1/ERN1/FGFR2/IGF1/MYB/ELANE/HPGD	7
GO:0098869	GO:0098869	cellular oxidant detoxification	7/724	103/18866	0.101134	0.457326	0.419783	EPX/HBD/HP/LPO/PTGS1/PXDNL/GSTO2	7
GO:1901570	GO:1901570	fatty acid derivative biosynthetic process	7/724	103/18866	0.101134	0.457326	0.419783	EDN1/ELOVL7/HACD1/PRG3/PTGS1/HPGD/ELOVL6	7
GO:0044262	GO:0044262	cellular carbohydrate metabolic process	16/724	294/18866	0.102452	0.462578	0.424604	B4GALT5/BAD/DDIT4/DGKQ/GALK2/GBE1/GPLD1/IGF1/MIDN/PER2/PTK2B/SDHAF3/SLC2A1/SORD/PYGM/ENPP1	16
GO:0050866	GO:0050866	negative regulation of cell activation	12/724	207/18866	0.102483	0.462578	0.424604	BPI/CLNK/DLG5/HFE/INHBA/PDCD1LG2/PGLYRP1/PRKG1/TNFAIP3/EMILIN1/GLI3/VTCN1	12
GO:0002700	GO:0002700	regulation of production of molecular mediator of immune response	9/724	144/18866	0.102883	0.463116	0.425098	CD226/CLC/CLNK/HFE/NOD2/TGFB1/TICAM1/TRIL/CD160	9
GO:0106106	GO:0106106	cold-induced thermogenesis	9/724	144/18866	0.102883	0.463116	0.425098	ACHE/CAV1/PDGFC/PER2/PTH2R/FFAR4/VEGFA/ELOVL6/PLCL1	9
GO:0120161	GO:0120161	regulation of cold-induced thermogenesis	9/724	144/18866	0.102883	0.463116	0.425098	ACHE/CAV1/PDGFC/PER2/PTH2R/FFAR4/VEGFA/ELOVL6/PLCL1	9
GO:0030279	GO:0030279	negative regulation of ossification	6/724	84/18866	0.103606	0.464137	0.426035	CHRD/GATA1/PTK2B/SEMA4D/TPH1/ENPP1	6
GO:0046209	GO:0046209	nitric oxide metabolic process	6/724	84/18866	0.103606	0.464137	0.426035	CAV1/EDN1/PTK2B/TICAM1/CD34/NOS1AP	6
GO:0050886	GO:0050886	endocrine process	6/724	84/18866	0.103606	0.464137	0.426035	CTSG/EDN1/ENPEP/FGFR1/HCAR2/INHBA	6
GO:0007588	GO:0007588	excretion	5/724	65/18866	0.103768	0.464137	0.426035	AQP9/EDN1/SPX/ADORA1/NPPB	5
GO:0017156	GO:0017156	calcium-ion regulated exocytosis	5/724	65/18866	0.103768	0.464137	0.426035	CDK5/RIMS3/SYT1/SYT15/UNC13B	5
GO:0060389	GO:0060389	pathway-restricted SMAD protein phosphorylation	5/724	65/18866	0.103768	0.464137	0.426035	HFE/INHBA/TGFB1/TGFBR3/EMILIN1	5
GO:0090307	GO:0090307	mitotic spindle assembly	5/724	65/18866	0.103768	0.464137	0.426035	CEP192/KPNB1/MAP10/MYBL2/AURKC	5
GO:0006936	GO:0006936	muscle contraction	19/724	362/18866	0.10501	0.467979	0.429562	AKAP9/CAV1/CRYAB/EDN1/KCNH2/KIT/MYL6B/PKP2/PPP1R13L/PRKG1/SMTN/SPX/TMOD2/TNNC1/TRIM72/ACTA1/ADORA1/ATP2A1/NOS1AP	19
GO:0007080	GO:0007080	mitotic metaphase plate congression	4/724	47/18866	0.105233	0.467979	0.429562	CDCA8/KIF14/KPNB1/NDC80	4
GO:0007140	GO:0007140	male meiotic nuclear division	4/724	47/18866	0.105233	0.467979	0.429562	MEIKIN/TRIP13/CCNA1/TEX19	4
GO:0042551	GO:0042551	neuron maturation	4/724	47/18866	0.105233	0.467979	0.429562	B4GALT5/GLDN/NRCAM/TBX6	4
GO:0045776	GO:0045776	negative regulation of blood pressure	4/724	47/18866	0.105233	0.467979	0.429562	OPRL1/RNPEP/ADORA1/NPPB	4
GO:0051150	GO:0051150	regulation of smooth muscle cell differentiation	4/724	47/18866	0.105233	0.467979	0.429562	FGFR2/KIT/NFATC1/ZEB1	4
GO:0001844	GO:0001844	protein insertion into mitochondrial membrane involved in apoptotic signaling pathway	3/724	30/18866	0.106428	0.467979	0.429562	BAD/MOAP1/PPP3CC	3
GO:0003401	GO:0003401	axis elongation	3/724	30/18866	0.106428	0.467979	0.429562	ESR1/FGFR2/HNF1B	3
GO:0006884	GO:0006884	cell volume homeostasis	3/724	30/18866	0.106428	0.467979	0.429562	AQP11/SLC12A1/SHANK3	3
GO:0007271	GO:0007271	synaptic transmission, cholinergic	3/724	30/18866	0.106428	0.467979	0.429562	ACHE/ANXA9/LYPD1	3
GO:0019934	GO:0019934	cGMP-mediated signaling	3/724	30/18866	0.106428	0.467979	0.429562	PRKG1/PTK2B/NPPB	3
GO:0030511	GO:0030511	positive regulation of transforming growth factor beta receptor signaling pathway	3/724	30/18866	0.106428	0.467979	0.429562	CDKN2B/CITED2/TGFBR3	3
GO:0031116	GO:0031116	positive regulation of microtubule polymerization	3/724	30/18866	0.106428	0.467979	0.429562	AKAP9/SLAIN2/NAV3	3
GO:0060122	GO:0060122	inner ear receptor cell stereocilium organization	3/724	30/18866	0.106428	0.467979	0.429562	CDH23/TPRN/FAT4	3
GO:0061082	GO:0061082	myeloid leukocyte cytokine production	3/724	30/18866	0.106428	0.467979	0.429562	KIT/TGFB1/TICAM1	3
GO:0070723	GO:0070723	response to cholesterol	3/724	30/18866	0.106428	0.467979	0.429562	GPLD1/INHBA/TGFB1	3
GO:0099625	GO:0099625	ventricular cardiac muscle cell membrane repolarization	3/724	30/18866	0.106428	0.467979	0.429562	AKAP9/KCNH2/NOS1AP	3
GO:1900027	GO:1900027	regulation of ruffle assembly	3/724	30/18866	0.106428	0.467979	0.429562	CAV1/EPS8L3/STAP1	3
GO:1903846	GO:1903846	positive regulation of cellular response to transforming growth factor beta stimulus	3/724	30/18866	0.106428	0.467979	0.429562	CDKN2B/CITED2/TGFBR3	3
GO:0045927	GO:0045927	positive regulation of growth	15/724	274/18866	0.107155	0.470757	0.432112	EDN1/FGFR1/FGFR2/IGF1/PLAA/PTK2B/RNF157/SEMA4D/SUPV3L1/SYT1/TGFBR3/TNFRSF12A/TRPC5/BDNF/VEGFA	15
GO:0045844	GO:0045844	positive regulation of striated muscle tissue development	6/724	85/18866	0.108081	0.471457	0.432754	EDN1/FGFR1/FGFR2/IGF1/TGFB1/TGFBR3	6
GO:0048636	GO:0048636	positive regulation of muscle organ development	6/724	85/18866	0.108081	0.471457	0.432754	EDN1/FGFR1/FGFR2/IGF1/TGFB1/TGFBR3	6
GO:0002228	GO:0002228	natural killer cell mediated immunity	5/724	66/18866	0.108942	0.471457	0.432754	CD226/CLNK/PIK3R6/RAB27A/CD160	5
GO:0048738	GO:0048738	cardiac muscle tissue development	13/724	231/18866	0.108996	0.471457	0.432754	EDN1/FGFR1/FGFR2/IGF1/MAPK11/NRAP/PKP2/PPP1R13L/TGFB1/TGFBR3/TNNC1/VEGFA/TENM4	13
GO:0051259	GO:0051259	protein complex oligomerization	13/724	231/18866	0.108996	0.471457	0.432754	AQP11/DISP1/MPP2/PNPT1/POLQ/STEAP4/SYT1/TRIM72/KRT1/TRPM3/TRPM6/KCNS3/RYR3	13
GO:0048259	GO:0048259	regulation of receptor-mediated endocytosis	7/724	105/18866	0.109076	0.471457	0.432754	ANGPT1/DLG4/HFE/PCSK9/WDR54/VEGFA/EGF	7
GO:1902106	GO:1902106	negative regulation of leukocyte differentiation	7/724	105/18866	0.109076	0.471457	0.432754	GATA2/INHBA/LRRC17/LTF/PGLYRP1/TMEM176A/GLI3	7
GO:0031345	GO:0031345	negative regulation of cell projection organization	11/724	188/18866	0.109134	0.471457	0.432754	CDK5/MAP2/PMP22/SEMA4D/SEMA6B/SPOCK1/TBX6/TRAK2/TRPC5/TRPC6/STAP1	11
GO:0006644	GO:0006644	phospholipid metabolic process	23/724	455/18866	0.109485	0.471457	0.432754	ACHE/AGPAT4/CD19/DBI/DGKQ/GPLD1/KIT/NOD2/PCSK9/PIK3R6/PIP5K1B/PLAA/PLEKHA1/PLEKHA3/PTK2B/RAB38/SOCS3/SPTLC1/TGFB1/BMX/ETNK2/PIP5KL1/PITPNM2	23
GO:0051090	GO:0051090	regulation of DNA-binding transcription factor activity	23/724	455/18866	0.109485	0.471457	0.432754	ADAM8/CAV1/EDN1/ESR1/HCK/HES6/KIT/LTF/MAPK11/MIR101-1/NOD2/NTRK1/PPP2R5B/PRKCH/PRKCQ/S100A12/TBX6/TICAM1/TNFAIP3/TRADD/TRAIP/VEGFA/ENPP1	23
GO:0030100	GO:0030100	regulation of endocytosis	12/724	210/18866	0.110746	0.471457	0.432754	ANGPT1/CAV1/DGKQ/DLG4/GATA2/HFE/PCSK9/PPP3CC/WDR54/STAP1/VEGFA/EGF	12
GO:0002091	GO:0002091	negative regulation of receptor internalization	2/724	15/18866	0.111102	0.471457	0.432754	DLG4/WDR54	2
GO:0006828	GO:0006828	manganese ion transport	2/724	15/18866	0.111102	0.471457	0.432754	TRPC5/TRPC6	2
GO:0033151	GO:0033151	V(D)J recombination	2/724	15/18866	0.111102	0.471457	0.432754	TCF7/RAG1	2
GO:0033623	GO:0033623	regulation of integrin activation	2/724	15/18866	0.111102	0.471457	0.432754	KIF14/SELP	2
GO:0034134	GO:0034134	toll-like receptor 2 signaling pathway	2/724	15/18866	0.111102	0.471457	0.432754	MFHAS1/TNFAIP3	2
GO:0035635	GO:0035635	entry of bacterium into host cell	2/724	15/18866	0.111102	0.471457	0.432754	CAV1/CXCL8	2
GO:0042362	GO:0042362	fat-soluble vitamin biosynthetic process	2/724	15/18866	0.111102	0.471457	0.432754	SNAI1/CYP27A1	2
GO:0042754	GO:0042754	negative regulation of circadian rhythm	2/724	15/18866	0.111102	0.471457	0.432754	PER2/ADORA1	2
GO:0043101	GO:0043101	purine-containing compound salvage	2/724	15/18866	0.111102	0.471457	0.432754	ADAL/MTAP	2
GO:0044849	GO:0044849	estrous cycle	2/724	15/18866	0.111102	0.471457	0.432754	OPRL1/PTN	2
GO:0045779	GO:0045779	negative regulation of bone resorption	2/724	15/18866	0.111102	0.471457	0.432754	TMEM119/TNFAIP3	2
GO:0045837	GO:0045837	negative regulation of membrane potential	2/724	15/18866	0.111102	0.471457	0.432754	PTN/PIP5KL1	2
GO:0048368	GO:0048368	lateral mesoderm development	2/724	15/18866	0.111102	0.471457	0.432754	CITED2/FGFR1	2
GO:0048569	GO:0048569	post-embryonic animal organ development	2/724	15/18866	0.111102	0.471457	0.432754	BAK1/VEGFA	2
GO:0051044	GO:0051044	positive regulation of membrane protein ectodomain proteolysis	2/724	15/18866	0.111102	0.471457	0.432754	ADAM8/GPLD1	2
GO:0055057	GO:0055057	neuroblast division	2/724	15/18866	0.111102	0.471457	0.432754	FGFR1/FGFR2	2
GO:0060009	GO:0060009	Sertoli cell development	2/724	15/18866	0.111102	0.471457	0.432754	NTRK1/RAB13	2
GO:0060049	GO:0060049	regulation of protein glycosylation	2/724	15/18866	0.111102	0.471457	0.432754	RAMP1/ACER2	2
GO:0060099	GO:0060099	regulation of phagocytosis, engulfment	2/724	15/18866	0.111102	0.471457	0.432754	GATA2/STAP1	2
GO:0070365	GO:0070365	hepatocyte differentiation	2/724	15/18866	0.111102	0.471457	0.432754	E2F7/HNF1B	2
GO:0097202	GO:0097202	activation of cysteine-type endopeptidase activity	2/724	15/18866	0.111102	0.471457	0.432754	BAD/BAK1	2
GO:0099188	GO:0099188	postsynaptic cytoskeleton organization	2/724	15/18866	0.111102	0.471457	0.432754	PPP1R9A/NOS1AP	2
GO:1901550	GO:1901550	regulation of endothelial cell development	2/724	15/18866	0.111102	0.471457	0.432754	S1PR3/VEGFA	2
GO:1903140	GO:1903140	regulation of establishment of endothelial barrier	2/724	15/18866	0.111102	0.471457	0.432754	S1PR3/VEGFA	2
GO:1905820	GO:1905820	positive regulation of chromosome separation	2/724	15/18866	0.111102	0.471457	0.432754	CDC16/MAPK15	2
GO:2000345	GO:2000345	regulation of hepatocyte proliferation	2/724	15/18866	0.111102	0.471457	0.432754	PTN/TNFAIP3	2
GO:2001028	GO:2001028	positive regulation of endothelial cell chemotaxis	2/724	15/18866	0.111102	0.471457	0.432754	FGFR1/VEGFA	2
GO:0008089	GO:0008089	anterograde axonal transport	4/724	48/18866	0.111515	0.471457	0.432754	AGBL4/MAP2/RAB27B/TRAK2	4
GO:0008206	GO:0008206	bile acid metabolic process	4/724	48/18866	0.111515	0.471457	0.432754	ACOT8/KIT/OSBPL6/CYP27A1	4
GO:0033628	GO:0033628	regulation of cell adhesion mediated by integrin	4/724	48/18866	0.111515	0.471457	0.432754	CRKL/DPP4/EPHA2/ACER2	4
GO:0061001	GO:0061001	regulation of dendritic spine morphogenesis	4/724	48/18866	0.111515	0.471457	0.432754	CDK5/PPP1R9A/SIPA1L1/SHANK3	4
GO:1900274	GO:1900274	regulation of phospholipase C activity	4/724	48/18866	0.111515	0.471457	0.432754	ESR1/FGFR1/KIT/BDNF	4
GO:1990573	GO:1990573	potassium ion import across plasma membrane	4/724	48/18866	0.111515	0.471457	0.432754	KCNH2/SLC12A1/WNK2/KCNJ16	4
GO:2000027	GO:2000027	regulation of animal organ morphogenesis	14/724	254/18866	0.112046	0.473295	0.434441	CITED2/EDN1/ESR1/FGFR1/FGFR2/NFIB/PTN/RUNX2/TFAP2A/TNFAIP3/BDNF/CD34/HNF1B/VEGFA	14
GO:0008589	GO:0008589	regulation of smoothened signaling pathway	6/724	86/18866	0.112653	0.474644	0.43568	DLG5/DYNC2H1/FGFR2/RUNX2/GLI3/ENPP1	6
GO:0034637	GO:0034637	cellular carbohydrate biosynthetic process	6/724	86/18866	0.112653	0.474644	0.43568	B4GALT5/GBE1/IGF1/PER2/SLC2A1/ENPP1	6
GO:1901863	GO:1901863	positive regulation of muscle tissue development	6/724	86/18866	0.112653	0.474644	0.43568	EDN1/FGFR1/FGFR2/IGF1/TGFB1/TGFBR3	6
GO:0007189	GO:0007189	adenylate cyclase-activating G protein-coupled receptor signaling pathway	9/724	147/18866	0.112987	0.475192	0.436183	ADGRE3/ADGRG1/ADGRG5/ADGRL2/OPRL1/RAMP1/S1PR3/ADGRL3/PTGER2	9
GO:0046928	GO:0046928	regulation of neurotransmitter secretion	7/724	106/18866	0.113168	0.475192	0.436183	CDK5/GRIN3A/PPP1R9A/PREPL/RIMS3/SYT1/UNC13B	7
GO:0071156	GO:0071156	regulation of cell cycle arrest	7/724	106/18866	0.113168	0.475192	0.436183	CDK5/CDKN1A/E2F7/GADD45A/GTSE1/PPP2R5B/SETMAR	7
GO:1904029	GO:1904029	regulation of cyclin-dependent protein kinase activity	7/724	106/18866	0.113168	0.475192	0.436183	CDKN1A/CDKN2B/CDKN3/CKS2/GADD45A/TNFAIP3/CCNA1	7
GO:1901214	GO:1901214	regulation of neuron death	17/724	321/18866	0.113275	0.475235	0.436222	ADAM8/ANGPT1/BAD/CDK5/DDIT4/FOXO3/KIF14/MYB/MYBL2/NTRK1/PCSK9/PTK2B/RASA1/TFAP2A/ADORA1/BDNF/CD34	17
GO:0036498	GO:0036498	IRE1-mediated unfolded protein response	5/724	67/18866	0.114239	0.476124	0.437039	BAK1/DNAJB11/ERN1/FKBP14/PPP2R5B	5
GO:0045123	GO:0045123	cellular extravasation	5/724	67/18866	0.114239	0.476124	0.437039	ADAM8/CRKL/ITGB7/SELP/ELANE	5
GO:0051965	GO:0051965	positive regulation of synapse assembly	5/724	67/18866	0.114239	0.476124	0.437039	DLG5/NTRK1/SEMA4D/ADGRL3/BDNF	5
GO:0018200	GO:0018200	peptidyl-glutamic acid modification	3/724	31/18866	0.114644	0.476124	0.437039	AGBL4/VKORC1/AGBL2	3
GO:0021799	GO:0021799	cerebral cortex radially oriented cell migration	3/724	31/18866	0.114644	0.476124	0.437039	ADGRG1/CDK5/GLI3	3
GO:0045987	GO:0045987	positive regulation of smooth muscle contraction	3/724	31/18866	0.114644	0.476124	0.437039	EDN1/KIT/SPX	3
GO:0071549	GO:0071549	cellular response to dexamethasone stimulus	3/724	31/18866	0.114644	0.476124	0.437039	DDIT4/SMYD3/FBXO32	3
GO:0086011	GO:0086011	membrane repolarization during action potential	3/724	31/18866	0.114644	0.476124	0.437039	CAV1/KCNH2/NOS1AP	3
GO:0090075	GO:0090075	relaxation of muscle	3/724	31/18866	0.114644	0.476124	0.437039	PRKG1/ADORA1/ATP2A1	3
GO:0099623	GO:0099623	regulation of cardiac muscle cell membrane repolarization	3/724	31/18866	0.114644	0.476124	0.437039	AKAP9/KCNH2/NOS1AP	3
GO:1900745	GO:1900745	positive regulation of p38MAPK cascade	3/724	31/18866	0.114644	0.476124	0.437039	GADD45A/MFHAS1/VEGFA	3
GO:1905476	GO:1905476	negative regulation of protein localization to membrane	3/724	31/18866	0.114644	0.476124	0.437039	DMTN/TGFB1/LYPD1	3
GO:0008064	GO:0008064	regulation of actin polymerization or depolymerization	11/724	190/18866	0.115145	0.476811	0.437669	ARHGAP35/DMTN/ESAM/HCK/NCKAP1/PPP1R9A/PTK2B/RASA1/TMOD2/WHAMM/TENM1	11
GO:0006979	GO:0006979	response to oxidative stress	23/724	458/18866	0.115175	0.476811	0.437669	AIFM2/BAD/BAK1/CRYAB/EDN1/EPX/FOXO3/HP/LONP1/LPO/MTF1/MYB/PLEKHA1/PNPT1/PTGS1/PTK2B/PXDNL/PYCR1/RAD52/TNFAIP3/TRPC6/KRT1/SLC1A1	23
GO:0002429	GO:0002429	immune response-activating cell surface receptor signaling pathway	24/724	481/18866	0.115196	0.476811	0.437669	BTN3A3/BTNL8/CD19/CD226/CLEC4D/CRKL/EIF2B5/GCSAML/GPLD1/HCK/HLA-DQB2/NCKAP1/PLEKHA1/PRKCH/PRKCQ/TESPA1/TRAT1/BMX/BTNL9/CD160/CLEC4E/STAP1/VTCN1/HLA-DQA1	24
GO:0002757	GO:0002757	immune response-activating signal transduction	24/724	481/18866	0.115196	0.476811	0.437669	BTN3A3/BTNL8/CD19/CD226/CLEC4D/CRKL/EIF2B5/GCSAML/GPLD1/HCK/HLA-DQB2/NCKAP1/PLEKHA1/PRKCH/PRKCQ/TESPA1/TRAT1/BMX/BTNL9/CD160/CLEC4E/STAP1/VTCN1/HLA-DQA1	24
GO:0046394	GO:0046394	carboxylic acid biosynthetic process	19/724	367/18866	0.11552	0.477755	0.438535	ACOT7/ACOT8/ACSM1/ACSM3/EDN1/ELOVL7/HACD1/MTAP/OSBPL6/PER2/PRG3/PTGS1/PYCR1/TGFB1/CYP27A1/DSEL/HPGD/EGF/ELOVL6	19
GO:1900180	GO:1900180	regulation of protein localization to nucleus	8/724	127/18866	0.115654	0.477909	0.438676	ANGPT1/GTSE1/MFHAS1/TGFB1/CARD10/DCLK2/GLI3/PKIA	8
GO:0051258	GO:0051258	protein polymerization	16/724	300/18866	0.116407	0.480087	0.440676	AKAP9/CEP192/DMTN/EML2/ESAM/HCK/MAP2/NCKAP1/PPP1R9A/PTK2B/RASA1/SLAIN2/TMOD2/WHAMM/TENM1/NAV3	16
GO:0008277	GO:0008277	regulation of G protein-coupled receptor signaling pathway	9/724	148/18866	0.116473	0.480087	0.440676	CXCL8/DGKQ/EDN1/OPRL1/PTGDR2/RAMP1/RGS20/RNF157/TMOD2	9
GO:0010675	GO:0010675	regulation of cellular carbohydrate metabolic process	9/724	148/18866	0.116473	0.480087	0.440676	BAD/DDIT4/DGKQ/GPLD1/IGF1/MIDN/PTK2B/SDHAF3/ENPP1	9
GO:0090257	GO:0090257	regulation of muscle system process	14/724	256/18866	0.117253	0.480202	0.440781	AKAP9/CAV1/EDN1/FOXO3/IGF1/KIT/PKP2/PRKG1/SPX/TNNC1/ADORA1/ATP2A1/FBXO32/NOS1AP	14
GO:0060420	GO:0060420	regulation of heart growth	6/724	87/18866	0.117323	0.480202	0.440781	EDN1/FGFR1/FGFR2/IGF1/MAPK11/TGFBR3	6
GO:1904705	GO:1904705	regulation of vascular associated smooth muscle cell proliferation	6/724	87/18866	0.117323	0.480202	0.440781	CDKN1A/EDN1/ERN1/IGF1/PRKG1/HPGD	6
GO:1990874	GO:1990874	vascular associated smooth muscle cell proliferation	6/724	87/18866	0.117323	0.480202	0.440781	CDKN1A/EDN1/ERN1/IGF1/PRKG1/HPGD	6
GO:2001057	GO:2001057	reactive nitrogen species metabolic process	6/724	87/18866	0.117323	0.480202	0.440781	CAV1/EDN1/PTK2B/TICAM1/CD34/NOS1AP	6
GO:0034404	GO:0034404	nucleobase-containing small molecule biosynthetic process	7/724	107/18866	0.11734	0.480202	0.440781	ACOT7/ADAL/CDA/GMPS/MTAP/SMPDL3A/ENPP1	7
GO:0055017	GO:0055017	cardiac muscle tissue growth	7/724	107/18866	0.11734	0.480202	0.440781	EDN1/FGFR1/FGFR2/IGF1/MAPK11/TGFBR3/TENM4	7
GO:0099175	GO:0099175	regulation of postsynapse organization	7/724	107/18866	0.11734	0.480202	0.440781	CDK5/CRKL/NRCAM/PPP1R9A/PTN/SIPA1L1/SHANK3	7
GO:0016053	GO:0016053	organic acid biosynthetic process	19/724	368/18866	0.117697	0.480202	0.440781	ACOT7/ACOT8/ACSM1/ACSM3/EDN1/ELOVL7/HACD1/MTAP/OSBPL6/PER2/PRG3/PTGS1/PYCR1/TGFB1/CYP27A1/DSEL/HPGD/EGF/ELOVL6	19
GO:0006692	GO:0006692	prostanoid metabolic process	4/724	49/18866	0.11796	0.480202	0.440781	EDN1/PLAA/PTGS1/HPGD	4
GO:0006693	GO:0006693	prostaglandin metabolic process	4/724	49/18866	0.11796	0.480202	0.440781	EDN1/PLAA/PTGS1/HPGD	4
GO:0021517	GO:0021517	ventral spinal cord development	4/724	49/18866	0.11796	0.480202	0.440781	DYNC2H1/GATA2/LMO4/GLI3	4
GO:0030850	GO:0030850	prostate gland development	4/724	49/18866	0.11796	0.480202	0.440781	ESR1/FGFR2/WDR77/GLI3	4
GO:0086009	GO:0086009	membrane repolarization	4/724	49/18866	0.11796	0.480202	0.440781	AKAP9/CAV1/KCNH2/NOS1AP	4
GO:0097720	GO:0097720	calcineurin-mediated signaling	4/724	49/18866	0.11796	0.480202	0.440781	IGF1/NFATC1/PPP3CC/SLC8A2	4
GO:0030832	GO:0030832	regulation of actin filament length	11/724	191/18866	0.118219	0.480863	0.441388	ARHGAP35/DMTN/ESAM/HCK/NCKAP1/PPP1R9A/PTK2B/RASA1/TMOD2/WHAMM/TENM1	11
GO:0007162	GO:0007162	negative regulation of cell adhesion	16/724	301/18866	0.118838	0.482981	0.443332	ANGPT1/DLG5/DMTN/HFE/PDCD1LG2/PLG/PLXNC1/PRKG1/RASA1/SEMA4D/SPOCK1/TGFB1/ACER2/GLI3/VEGFA/VTCN1	16
GO:0014013	GO:0014013	regulation of gliogenesis	8/724	128/18866	0.119488	0.484314	0.444556	CRKL/DAAM2/MYB/PRKCH/PTN/TGFB1/STAP1/TENM4	8
GO:0034763	GO:0034763	negative regulation of transmembrane transport	8/724	128/18866	0.119488	0.484314	0.444556	CAV1/KCNH2/OPRL1/PCSK9/SLC6A9/ANK3/ENPP1/GEM	8
GO:0072089	GO:0072089	stem cell proliferation	8/724	128/18866	0.119488	0.484314	0.444556	ABCB1/FGFR1/FGFR2/PTN/BDNF/CD34/GLI3/VEGFA	8
GO:0010812	GO:0010812	negative regulation of cell-substrate adhesion	5/724	68/18866	0.119656	0.484314	0.444556	DMTN/PLG/RASA1/SPOCK1/ACER2	5
GO:0071479	GO:0071479	cellular response to ionizing radiation	5/724	68/18866	0.119656	0.484314	0.444556	CDKN1A/CRYAB/GADD45A/KDM4D/TANK	5
GO:0002062	GO:0002062	chondrocyte differentiation	7/724	108/18866	0.121591	0.485084	0.445263	FGFR1/GPLD1/NFIB/RUNX2/TGFB1/BMPR1B/GLI3	7
GO:0007229	GO:0007229	integrin-mediated signaling pathway	7/724	108/18866	0.121591	0.485084	0.445263	DMTN/HCK/ITGA2B/ITGB7/ITGBL1/PTK2B/PTN	7
GO:0032410	GO:0032410	negative regulation of transporter activity	6/724	88/18866	0.122087	0.485084	0.445263	CAV1/OPRL1/PCSK9/SLC6A9/ANK3/GEM	6
GO:0006869	GO:0006869	lipid transport	20/724	393/18866	0.122649	0.485084	0.445263	ABCA6/ABCA9/ABCB1/APOO/AQP9/CAV1/DBI/EDN1/INHBA/MYB/OSBPL6/PCSK9/PLEKHA3/SLC10A7/SLC25A20/SLC2A1/SPX/PITPNM2/PLEKHA8P1/EGF	20
GO:0003016	GO:0003016	respiratory system process	3/724	32/18866	0.123091	0.485084	0.445263	FTO/TNNC1/ADORA1	3
GO:0034694	GO:0034694	response to prostaglandin	3/724	32/18866	0.123091	0.485084	0.445263	EDN1/TGFBR3/PTGER2	3
GO:0046949	GO:0046949	fatty-acyl-CoA biosynthetic process	3/724	32/18866	0.123091	0.485084	0.445263	ELOVL7/HACD1/ELOVL6	3
GO:0048841	GO:0048841	regulation of axon extension involved in axon guidance	3/724	32/18866	0.123091	0.485084	0.445263	SEMA4D/SEMA6B/VEGFA	3
GO:0051968	GO:0051968	positive regulation of synaptic transmission, glutamatergic	3/724	32/18866	0.123091	0.485084	0.445263	NTRK1/PTK2B/SHANK3	3
GO:0060603	GO:0060603	mammary gland duct morphogenesis	3/724	32/18866	0.123091	0.485084	0.445263	EPHA2/ESR1/FGFR2	3
GO:0097421	GO:0097421	liver regeneration	3/724	32/18866	0.123091	0.485084	0.445263	HFE/PNPT1/GLI3	3
GO:0098810	GO:0098810	neurotransmitter reuptake	3/724	32/18866	0.123091	0.485084	0.445263	PER2/SLC18A2/SLC22A1	3
GO:0000041	GO:0000041	transition metal ion transport	8/724	129/18866	0.123388	0.485084	0.445263	FLVCR2/HFE/LTF/SFXN1/STEAP4/TRPC5/TRPC6/TCN1	8
GO:0070665	GO:0070665	positive regulation of leukocyte proliferation	9/724	150/18866	0.12362	0.485084	0.445263	CDKN1A/IGF1/IL5RA/MPL/PDCD1LG2/PRKCQ/TICAM1/TNFSF9/VTCN1	9
GO:0001780	GO:0001780	neutrophil homeostasis	2/724	16/18866	0.123874	0.485084	0.445263	HCAR2/MPL	2
GO:0002834	GO:0002834	regulation of response to tumor cell	2/724	16/18866	0.123874	0.485084	0.445263	CD226/CD160	2
GO:0002837	GO:0002837	regulation of immune response to tumor cell	2/724	16/18866	0.123874	0.485084	0.445263	CD226/CD160	2
GO:0006206	GO:0006206	pyrimidine nucleobase metabolic process	2/724	16/18866	0.123874	0.485084	0.445263	CDA/CTPS1	2
GO:0006390	GO:0006390	mitochondrial transcription	2/724	16/18866	0.123874	0.485084	0.445263	FOXO3/POLRMT	2
GO:0007351	GO:0007351	tripartite regional subdivision	2/724	16/18866	0.123874	0.485084	0.445263	TDGF1/WDR77	2
GO:0007567	GO:0007567	parturition	2/724	16/18866	0.123874	0.485084	0.445263	EDN1/HPGD	2
GO:0008595	GO:0008595	anterior/posterior axis specification, embryo	2/724	16/18866	0.123874	0.485084	0.445263	TDGF1/WDR77	2
GO:0019511	GO:0019511	peptidyl-proline hydroxylation	2/724	16/18866	0.123874	0.485084	0.445263	CRTAP/P4HA3	2
GO:0032354	GO:0032354	response to follicle-stimulating hormone	2/724	16/18866	0.123874	0.485084	0.445263	INHBA/TGFBR3	2
GO:0042532	GO:0042532	negative regulation of tyrosine phosphorylation of STAT protein	2/724	16/18866	0.123874	0.485084	0.445263	CAV1/SOCS3	2
GO:0043174	GO:0043174	nucleoside salvage	2/724	16/18866	0.123874	0.485084	0.445263	CDA/MTAP	2
GO:0043252	GO:0043252	sodium-independent organic anion transport	2/724	16/18866	0.123874	0.485084	0.445263	SLC16A2/SLCO4C1	2
GO:0044065	GO:0044065	regulation of respiratory system process	2/724	16/18866	0.123874	0.485084	0.445263	FTO/ADORA1	2
GO:0045838	GO:0045838	positive regulation of membrane potential	2/724	16/18866	0.123874	0.485084	0.445263	BAD/ANK3	2
GO:0045989	GO:0045989	positive regulation of striated muscle contraction	2/724	16/18866	0.123874	0.485084	0.445263	ATP2A1/NOS1AP	2
GO:0048172	GO:0048172	regulation of short-term neuronal synaptic plasticity	2/724	16/18866	0.123874	0.485084	0.445263	SLC8A2/UNC13B	2
GO:0050774	GO:0050774	negative regulation of dendrite morphogenesis	2/724	16/18866	0.123874	0.485084	0.445263	TRPC5/TRPC6	2
GO:0050965	GO:0050965	detection of temperature stimulus involved in sensory perception of pain	2/724	16/18866	0.123874	0.485084	0.445263	NTRK1/ADORA1	2
GO:0051127	GO:0051127	positive regulation of actin nucleation	2/724	16/18866	0.123874	0.485084	0.445263	NCKAP1/WHAMM	2
GO:0051447	GO:0051447	negative regulation of meiotic cell cycle	2/724	16/18866	0.123874	0.485084	0.445263	HORMAD1/TRIP13	2
GO:0051770	GO:0051770	positive regulation of nitric-oxide synthase biosynthetic process	2/724	16/18866	0.123874	0.485084	0.445263	AKAP12/NOD2	2
GO:1900121	GO:1900121	negative regulation of receptor binding	2/724	16/18866	0.123874	0.485084	0.445263	HFE/PCSK9	2
GO:1901201	GO:1901201	regulation of extracellular matrix assembly	2/724	16/18866	0.123874	0.485084	0.445263	TGFB1/EMILIN1	2
GO:1905153	GO:1905153	regulation of membrane invagination	2/724	16/18866	0.123874	0.485084	0.445263	GATA2/STAP1	2
GO:2000651	GO:2000651	positive regulation of sodium ion transmembrane transporter activity	2/724	16/18866	0.123874	0.485084	0.445263	WNK2/ANK3	2
GO:2001034	GO:2001034	positive regulation of double-strand break repair via nonhomologous end joining	2/724	16/18866	0.123874	0.485084	0.445263	KDM4D/SETMAR	2
GO:0008038	GO:0008038	neuron recognition	4/724	50/18866	0.124562	0.485084	0.445263	ARHGAP35/NRCAM/BDNF/ROBO3	4
GO:0010718	GO:0010718	positive regulation of epithelial to mesenchymal transition	4/724	50/18866	0.124562	0.485084	0.445263	BAMBI/CRB2/SNAI1/TGFB1	4
GO:0014009	GO:0014009	glial cell proliferation	4/724	50/18866	0.124562	0.485084	0.445263	MYB/PRKCH/PTK2B/PTN	4
GO:0045646	GO:0045646	regulation of erythrocyte differentiation	4/724	50/18866	0.124562	0.485084	0.445263	FOXO3/GATA1/GATA2/INHBA	4
GO:0045806	GO:0045806	negative regulation of endocytosis	4/724	50/18866	0.124562	0.485084	0.445263	CAV1/DLG4/PCSK9/WDR54	4
GO:0048546	GO:0048546	digestive tract morphogenesis	4/724	50/18866	0.124562	0.485084	0.445263	FGFR2/TCF7/GLI3/HNF1B	4
GO:1904707	GO:1904707	positive regulation of vascular associated smooth muscle cell proliferation	4/724	50/18866	0.124562	0.485084	0.445263	EDN1/ERN1/IGF1/HPGD	4
GO:0010876	GO:0010876	lipid localization	22/724	440/18866	0.12515	0.486007	0.44611	ABCA6/ABCA9/ABCB1/APOO/AQP9/CAV1/DBI/EDN1/FTO/INHBA/MYB/OSBPL6/PCSK9/PLEKHA3/SLC10A7/SLC25A20/SLC2A1/SPX/PITPNM2/PLEKHA8P1/EGF/ENPP1	22
GO:0030032	GO:0030032	lamellipodium assembly	5/724	69/18866	0.125193	0.486007	0.44611	DMTN/EPHA2/KIT/NCKAP1/WHAMM	5
GO:0060038	GO:0060038	cardiac muscle cell proliferation	5/724	69/18866	0.125193	0.486007	0.44611	FGFR1/FGFR2/MAPK11/TGFBR3/TENM4	5
GO:2000573	GO:2000573	positive regulation of DNA biosynthetic process	5/724	69/18866	0.125193	0.486007	0.44611	DSCC1/PARM1/PRKCQ/PTK2B/MAPK15	5
GO:0070374	GO:0070374	positive regulation of ERK1 and ERK2 cascade	12/724	215/18866	0.125356	0.486259	0.446342	AKAP12/ANGPT1/ARHGAP8/CRKL/FGFR2/MFHAS1/NOD2/NTRK1/PDGFC/PTK2B/TGFB1/FFAR4	12
GO:0006939	GO:0006939	smooth muscle contraction	7/724	109/18866	0.12592	0.487628	0.447597	CAV1/EDN1/KIT/PRKG1/SMTN/SPX/ADORA1	7
GO:0021510	GO:0021510	spinal cord development	7/724	109/18866	0.12592	0.487628	0.447597	CHRD/DAAM2/DYNC2H1/GATA2/LMO4/PTN/GLI3	7
GO:1904062	GO:1904062	regulation of cation transmembrane transport	18/724	349/18866	0.126005	0.487628	0.447597	AKAP9/CAV1/CD19/CDK5/DLG4/KCNH2/KCNMB1/OPRL1/PCSK9/PTK2B/SLC6A9/WNK2/ANK3/ATP2A1/CNIH3/NOS1AP/GEM/SHANK3	18
GO:0001892	GO:0001892	embryonic placenta development	6/724	89/18866	0.126946	0.490883	0.450585	E2F7/FGFR2/GATA2/PLG/SNAI1/SOCS3	6
GO:0050678	GO:0050678	regulation of epithelial cell proliferation	20/724	395/18866	0.127047	0.490891	0.450593	AQP11/BAD/CAV1/CDKN2B/EGR3/FGFR1/FGFR2/GATA2/IGF1/MIR101-1/NFIB/NOD2/PTN/PTPRM/TGFB1/TGFBR3/TNFAIP3/UHRF1/WDR77/VEGFA	20
GO:1904892	GO:1904892	regulation of receptor signaling pathway via STAT	9/724	151/18866	0.12728	0.491312	0.450979	CAV1/CDK5/GADD45A/IGF1/KIT/PTK2B/SOCS3/IL22RA2/EGF	9
GO:0048706	GO:0048706	embryonic skeletal system development	8/724	130/18866	0.127355	0.491312	0.450979	FGFR2/HOXA9/RUNX2/TFAP2A/ZEB1/GLI3/MMP16/PBX1	8
GO:0007611	GO:0007611	learning or memory	14/724	260/18866	0.128084	0.493738	0.453206	CDK5/DLG4/KIT/NRGN/NRXN3/NTRK1/OPRL1/PTN/RIN1/SLC8A2/TMOD2/BDNF/RAG1/SHANK3	14
GO:0048660	GO:0048660	regulation of smooth muscle cell proliferation	10/724	173/18866	0.129668	0.49855	0.457623	CDKN1A/EDN1/ERN1/FGFR2/IGF1/MYB/PRKG1/TNFAIP3/ELANE/HPGD	10
GO:0050954	GO:0050954	sensory perception of mechanical stimulus	10/724	173/18866	0.129668	0.49855	0.457623	CDH23/EML2/FGFR1/GJB6/KIT/MARVELD2/NTRK1/OTOA/TFAP2A/TPRN	10
GO:0099173	GO:0099173	postsynapse organization	10/724	173/18866	0.129668	0.49855	0.457623	CDK5/CRKL/DLG4/NRCAM/PPP1R9A/PTN/SIPA1L1/CNKSR2/NOS1AP/SHANK3	10
GO:0090100	GO:0090100	positive regulation of transmembrane receptor protein serine/threonine kinase signaling pathway	7/724	110/18866	0.130326	0.49855	0.457623	CDKN2B/CITED2/CRB2/HFE/INHBA/TGFB1/TGFBR3	7
GO:1904659	GO:1904659	glucose transmembrane transport	7/724	110/18866	0.130326	0.49855	0.457623	EDN1/IGF1/SLC2A1/SLC2A6/FFAR4/SLC45A1/ENPP1	7
GO:0008088	GO:0008088	axo-dendritic transport	5/724	70/18866	0.130845	0.49855	0.457623	AGBL4/MAP2/RAB27B/TRAK2/UCHL1	5
GO:0009880	GO:0009880	embryonic pattern specification	5/724	70/18866	0.130845	0.49855	0.457623	DISP1/FGFR2/TBX6/TDGF1/WDR77	5
GO:0050771	GO:0050771	negative regulation of axonogenesis	5/724	70/18866	0.130845	0.49855	0.457623	CDK5/MAP2/SEMA4D/SEMA6B/TRAK2	5
GO:1905475	GO:1905475	regulation of protein localization to membrane	11/724	195/18866	0.130975	0.49855	0.457623	BAD/CDK5/CRKL/DMTN/EPHA2/PPP3CC/PRKCH/PTN/TGFB1/ANK3/LYPD1	11
GO:0001837	GO:0001837	epithelial to mesenchymal transition	9/724	152/18866	0.130997	0.49855	0.457623	BAMBI/CRB2/DLG5/FAM83D/FGFR1/FGFR2/SNAI1/TGFB1/TGFBR3	9
GO:0007605	GO:0007605	sensory perception of sound	9/724	152/18866	0.130997	0.49855	0.457623	CDH23/EML2/FGFR1/GJB6/KIT/MARVELD2/OTOA/TFAP2A/TPRN	9
GO:0002762	GO:0002762	negative regulation of myeloid leukocyte differentiation	4/724	51/18866	0.131317	0.49855	0.457623	GATA2/INHBA/LRRC17/LTF	4
GO:0035272	GO:0035272	exocrine system development	4/724	51/18866	0.131317	0.49855	0.457623	FGFR1/FGFR2/NFIB/TGFB1	4
GO:0045912	GO:0045912	negative regulation of carbohydrate metabolic process	4/724	51/18866	0.131317	0.49855	0.457623	DDIT4/MIDN/TGFB1/ENPP1	4
GO:1902893	GO:1902893	regulation of pri-miRNA transcription by RNA polymerase II	4/724	51/18866	0.131317	0.49855	0.457623	FOXO3/GATA2/NFIB/TGFB1	4
GO:0003231	GO:0003231	cardiac ventricle development	8/724	131/18866	0.131387	0.49855	0.457623	CITED2/FGFR2/LMO4/PKP2/PPP1R13L/TGFB1/TGFBR3/TNNC1	8
GO:0010810	GO:0010810	regulation of cell-substrate adhesion	12/724	217/18866	0.131489	0.49855	0.457623	CRKL/DMTN/EDIL3/PLG/PTK2B/PTN/RASA1/SPOCK1/ACER2/COL8A1/EMILIN1/VEGFA	12
GO:0002691	GO:0002691	regulation of cellular extravasation	3/724	33/18866	0.131755	0.49855	0.457623	ADAM8/SELP/ELANE	3
GO:0035025	GO:0035025	positive regulation of Rho protein signal transduction	3/724	33/18866	0.131755	0.49855	0.457623	ADGRG1/ARHGEF3/GPR174	3
GO:0035115	GO:0035115	embryonic forelimb morphogenesis	3/724	33/18866	0.131755	0.49855	0.457623	HOXA9/RUNX2/TFAP2A	3
GO:0040020	GO:0040020	regulation of meiotic nuclear division	3/724	33/18866	0.131755	0.49855	0.457623	HORMAD1/TRIP13/MAPK15	3
GO:0045736	GO:0045736	negative regulation of cyclin-dependent protein serine/threonine kinase activity	3/724	33/18866	0.131755	0.49855	0.457623	CDKN1A/CDKN2B/TNFAIP3	3
GO:0045879	GO:0045879	negative regulation of smoothened signaling pathway	3/724	33/18866	0.131755	0.49855	0.457623	RUNX2/GLI3/ENPP1	3
GO:1901380	GO:1901380	negative regulation of potassium ion transmembrane transport	3/724	33/18866	0.131755	0.49855	0.457623	CAV1/KCNH2/ANK3	3
GO:0030833	GO:0030833	regulation of actin filament polymerization	10/724	174/18866	0.133165	0.502892	0.461608	DMTN/ESAM/HCK/NCKAP1/PPP1R9A/PTK2B/RASA1/TMOD2/WHAMM/TENM1	10
GO:0097696	GO:0097696	receptor signaling pathway via STAT	10/724	174/18866	0.133165	0.502892	0.461608	CAV1/CDK5/GADD45A/IGF1/KIT/PTK2B/SOCS3/IL22RA2/EGF/STAT4	10
GO:0042063	GO:0042063	gliogenesis	16/724	307/18866	0.134049	0.502892	0.461608	ADGRG1/B4GALT5/CDK5/CRKL/DAAM2/EIF2B5/MYB/NFIB/PRKCH/PTK2B/PTN/TGFB1/GLI3/STAP1/TSPAN2/TENM4	16
GO:0002040	GO:0002040	sprouting angiogenesis	11/724	196/18866	0.134278	0.502892	0.461608	ANGPT1/E2F7/EGR3/EPHA2/GATA2/GPLD1/MIR101-1/PTK2B/TDGF1/CARD10/VEGFA	11
GO:0050728	GO:0050728	negative regulation of inflammatory response	11/724	196/18866	0.134278	0.502892	0.461608	IGF1/MEFV/MFHAS1/PGLYRP1/SOCS3/TNFAIP3/ADORA1/ELANE/FFAR4/IL22RA2/KRT1	11
GO:0002526	GO:0002526	acute inflammatory response	7/724	111/18866	0.134808	0.502892	0.461608	ADAM8/DNASE1/HFE/HP/TREM1/ADORA1/ELANE	7
GO:0042303	GO:0042303	molting cycle	7/724	111/18866	0.134808	0.502892	0.461608	FGFR2/INHBA/PER1/PPP1R13L/SNAI1/TRADD/EPS8L3	7
GO:0042633	GO:0042633	hair cycle	7/724	111/18866	0.134808	0.502892	0.461608	FGFR2/INHBA/PER1/PPP1R13L/SNAI1/TRADD/EPS8L3	7
GO:0001101	GO:0001101	response to acid chemical	8/724	132/18866	0.135484	0.502892	0.461608	BAD/COL6A1/EDN1/NTRK1/PDGFC/PTN/ZEB1/VEGFA	8
GO:0042476	GO:0042476	odontogenesis	8/724	132/18866	0.135484	0.502892	0.461608	EDN1/FGFR2/INHBA/RUNX2/TFAP2A/CD34/GLI3/SLC24A4	8
GO:0033692	GO:0033692	cellular polysaccharide biosynthetic process	5/724	71/18866	0.13661	0.502892	0.461608	B4GALT5/GBE1/IGF1/PER2/ENPP1	5
GO:0051785	GO:0051785	positive regulation of nuclear division	5/724	71/18866	0.13661	0.502892	0.461608	CDC16/EDN1/IGF1/MAPK15/EGF	5
GO:0007269	GO:0007269	neurotransmitter secretion	10/724	175/18866	0.136712	0.502892	0.461608	CDK5/GRIN3A/LIN7A/PPP1R9A/PREPL/RIMS3/SLC6A9/SYT1/UNC13B/SLC18A2	10
GO:0048659	GO:0048659	smooth muscle cell proliferation	10/724	175/18866	0.136712	0.502892	0.461608	CDKN1A/EDN1/ERN1/FGFR2/IGF1/MYB/PRKG1/TNFAIP3/ELANE/HPGD	10
GO:0050680	GO:0050680	negative regulation of epithelial cell proliferation	10/724	175/18866	0.136712	0.502892	0.461608	AQP11/CAV1/CDKN2B/FGFR2/NFIB/PTN/PTPRM/TGFB1/TGFBR3/WDR77	10
GO:0099643	GO:0099643	signal release from synapse	10/724	175/18866	0.136712	0.502892	0.461608	CDK5/GRIN3A/LIN7A/PPP1R9A/PREPL/RIMS3/SLC6A9/SYT1/UNC13B/SLC18A2	10
GO:1901568	GO:1901568	fatty acid derivative metabolic process	10/724	175/18866	0.136712	0.502892	0.461608	ACOT7/EDN1/ELOVL7/HACD1/PLAA/PRG3/PTGS1/FAAH2/HPGD/ELOVL6	10
GO:0001656	GO:0001656	metanephros development	6/724	91/18866	0.136938	0.502892	0.461608	DLG5/KIF26B/CD34/FAT4/GLI3/HNF1B	6
GO:0000963	GO:0000963	mitochondrial RNA processing	2/724	17/18866	0.136976	0.502892	0.461608	PNPT1/SUPV3L1	2
GO:0002483	GO:0002483	antigen processing and presentation of endogenous peptide antigen	2/724	17/18866	0.136976	0.502892	0.461608	HFE/TAP2	2
GO:0006586	GO:0006586	indolalkylamine metabolic process	2/724	17/18866	0.136976	0.502892	0.461608	AFMID/TPH1	2
GO:0009312	GO:0009312	oligosaccharide biosynthetic process	2/724	17/18866	0.136976	0.502892	0.461608	SLC2A1/ST3GAL4	2
GO:0010715	GO:0010715	regulation of extracellular matrix disassembly	2/724	17/18866	0.136976	0.502892	0.461608	DPP4/TGFB1	2
GO:0016045	GO:0016045	detection of bacterium	2/724	17/18866	0.136976	0.502892	0.461608	NOD2/PGLYRP1	2
GO:0019885	GO:0019885	antigen processing and presentation of endogenous peptide antigen via MHC class I	2/724	17/18866	0.136976	0.502892	0.461608	HFE/TAP2	2
GO:0030540	GO:0030540	female genitalia development	2/724	17/18866	0.136976	0.502892	0.461608	BAK1/ESR1	2
GO:0032682	GO:0032682	negative regulation of chemokine production	2/724	17/18866	0.136976	0.502892	0.461608	EPHA2/MEFV	2
GO:0038092	GO:0038092	nodal signaling pathway	2/724	17/18866	0.136976	0.502892	0.461608	CITED2/TDGF1	2
GO:0043649	GO:0043649	dicarboxylic acid catabolic process	2/724	17/18866	0.136976	0.502892	0.461608	ACOT8/ALDH1L2	2
GO:0044539	GO:0044539	long-chain fatty acid import into cell	2/724	17/18866	0.136976	0.502892	0.461608	SLC2A1/SPX	2
GO:0045986	GO:0045986	negative regulation of smooth muscle contraction	2/724	17/18866	0.136976	0.502892	0.461608	PRKG1/ADORA1	2
GO:0046068	GO:0046068	cGMP metabolic process	2/724	17/18866	0.136976	0.502892	0.461608	GUCY1A2/NPPB	2
GO:0046851	GO:0046851	negative regulation of bone remodeling	2/724	17/18866	0.136976	0.502892	0.461608	TMEM119/TNFAIP3	2
GO:0048532	GO:0048532	anatomical structure arrangement	2/724	17/18866	0.136976	0.502892	0.461608	KIF14/TFAP2A	2
GO:0090494	GO:0090494	dopamine uptake	2/724	17/18866	0.136976	0.502892	0.461608	MAPK15/SLC22A1	2
GO:0097067	GO:0097067	cellular response to thyroid hormone stimulus	2/724	17/18866	0.136976	0.502892	0.461608	GATA1/KIT	2
GO:0099509	GO:0099509	regulation of presynaptic cytosolic calcium ion concentration	2/724	17/18866	0.136976	0.502892	0.461608	CDK5/ADORA1	2
GO:0140354	GO:0140354	lipid import into cell	2/724	17/18866	0.136976	0.502892	0.461608	SLC2A1/SPX	2
GO:1900242	GO:1900242	regulation of synaptic vesicle endocytosis	2/724	17/18866	0.136976	0.502892	0.461608	DGKQ/PPP3CC	2
GO:1904355	GO:1904355	positive regulation of telomere capping	2/724	17/18866	0.136976	0.502892	0.461608	PRKCQ/MAPK15	2
GO:0006694	GO:0006694	steroid biosynthetic process	11/724	197/18866	0.137624	0.502966	0.461677	ACOT8/DDX20/DGKQ/HSD17B6/KPNB1/OSBPL6/SNAI1/CYP27A1/DKKL1/PBX1/ELOVL6	11
GO:0051216	GO:0051216	cartilage development	11/724	197/18866	0.137624	0.502966	0.461677	BMP1/EDN1/FGFR1/GPLD1/NFIB/RUNX2/SNAI1/TGFB1/ZEB1/BMPR1B/GLI3	11
GO:0051222	GO:0051222	positive regulation of protein transport	18/724	354/18866	0.13811	0.502966	0.461677	ACHE/ADAM8/BAD/CDK5/GPLD1/GTSE1/HCAR2/IGF1/PANX1/PPP3CC/TGFB1/UNC13B/ANK3/CD34/CLEC4E/GLI3/TENM1/SYTL4	18
GO:0007249	GO:0007249	I-kappaB kinase/NF-kappaB signaling	15/724	286/18866	0.138193	0.502966	0.461677	ANGPT1/ESR1/LTF/MIB2/MIER1/NOD2/PER1/PLEKHG5/RHOH/S100A12/TANK/TICAM1/TNFAIP3/TRADD/TSPAN6	15
GO:0000186	GO:0000186	activation of MAPKK activity	4/724	52/18866	0.138219	0.502966	0.461677	CRKL/NTRK1/ADORA1/EGF	4
GO:0001912	GO:0001912	positive regulation of leukocyte mediated cytotoxicity	4/724	52/18866	0.138219	0.502966	0.461677	CD1E/CD226/CD160/STAP1	4
GO:0003179	GO:0003179	heart valve morphogenesis	4/724	52/18866	0.138219	0.502966	0.461677	NFATC1/SNAI1/TGFB1/EMILIN1	4
GO:0033059	GO:0033059	cellular pigmentation	4/724	52/18866	0.138219	0.502966	0.461677	RAB27A/RAB27B/RAB38/MREG	4
GO:0038066	GO:0038066	p38MAPK cascade	4/724	52/18866	0.138219	0.502966	0.461677	GADD45A/MFHAS1/PER1/VEGFA	4
GO:0071622	GO:0071622	regulation of granulocyte chemotaxis	4/724	52/18866	0.138219	0.502966	0.461677	CXCL8/DAPK2/DPP4/EDN1	4
GO:1990089	GO:1990089	response to nerve growth factor	4/724	52/18866	0.138219	0.502966	0.461677	FOXO3/NTRK1/PTN/BDNF	4
GO:2000677	GO:2000677	regulation of transcription regulatory region DNA binding	4/724	52/18866	0.138219	0.502966	0.461677	GATA1/IGF1/PER2/TGFB1	4
GO:0051250	GO:0051250	negative regulation of lymphocyte activation	9/724	154/18866	0.138601	0.503562	0.462224	CLNK/DLG5/HFE/INHBA/PDCD1LG2/PGLYRP1/TNFAIP3/GLI3/VTCN1	9
GO:0008202	GO:0008202	steroid metabolic process	17/724	332/18866	0.14014	0.503562	0.462224	ACOT8/DDX20/DGKQ/EBPL/ESR1/FGFR1/HSD17B6/KIT/KPNB1/OSBPL6/PCSK9/PLEKHA1/SNAI1/CYP27A1/DKKL1/PBX1/ELOVL6	17
GO:0001819	GO:0001819	positive regulation of cytokine production	22/724	447/18866	0.14023	0.503562	0.462224	ADAM8/CD226/CLNK/EPX/IL1RL1/MAPK11/MYB/NOD2/PANX1/POLR3B/POLR3E/POLR3G/PRG3/PRKCQ/TGFB1/TICAM1/TSPAN6/C1QTNF4/CD160/CD34/CLEC4E/ELANE	22
GO:0010634	GO:0010634	positive regulation of epithelial cell migration	10/724	176/18866	0.140309	0.503562	0.462224	ANGPT1/EDN1/FGFR1/GATA2/GPLD1/MIR101-1/PTK2B/TDGF1/TGFB1/VEGFA	10
GO:0000038	GO:0000038	very long-chain fatty acid metabolic process	3/724	34/18866	0.140626	0.503562	0.462224	ELOVL7/HACD1/ELOVL6	3
GO:0000737	GO:0000737	DNA catabolic process, endonucleolytic	3/724	34/18866	0.140626	0.503562	0.462224	DNASE1/KPNB1/SETMAR	3
GO:0001881	GO:0001881	receptor recycling	3/724	34/18866	0.140626	0.503562	0.462224	ACHE/PCSK9/TRAT1	3
GO:0002888	GO:0002888	positive regulation of myeloid leukocyte mediated immunity	3/724	34/18866	0.140626	0.503562	0.462224	GATA2/TICAM1/STAP1	3
GO:0010762	GO:0010762	regulation of fibroblast migration	3/724	34/18866	0.140626	0.503562	0.462224	AKAP12/DMTN/TGFB1	3
GO:0010765	GO:0010765	positive regulation of sodium ion transport	3/724	34/18866	0.140626	0.503562	0.462224	PKP2/WNK2/ANK3	3
GO:0031112	GO:0031112	positive regulation of microtubule polymerization or depolymerization	3/724	34/18866	0.140626	0.503562	0.462224	AKAP9/SLAIN2/NAV3	3
GO:0032814	GO:0032814	regulation of natural killer cell activation	3/724	34/18866	0.140626	0.503562	0.462224	CLNK/PGLYRP1/TICAM1	3
GO:0042759	GO:0042759	long-chain fatty acid biosynthetic process	3/724	34/18866	0.140626	0.503562	0.462224	ACOT7/HPGD/ELOVL6	3
GO:0042908	GO:0042908	xenobiotic transport	3/724	34/18866	0.140626	0.503562	0.462224	ABCB1/SLC2A1/SLC22A1	3
GO:0043094	GO:0043094	cellular metabolic compound salvage	3/724	34/18866	0.140626	0.503562	0.462224	ADAL/CDA/MTAP	3
GO:0048536	GO:0048536	spleen development	3/724	34/18866	0.140626	0.503562	0.462224	CDKN2B/CITED2/PBX1	3
GO:0050715	GO:0050715	positive regulation of cytokine secretion	3/724	34/18866	0.140626	0.503562	0.462224	PANX1/CD34/CLEC4E	3
GO:0051482	GO:0051482	positive regulation of cytosolic calcium ion concentration involved in phospholipase C-activating G protein-coupled signaling pathway	3/724	34/18866	0.140626	0.503562	0.462224	EDN1/GPR174/OPRL1	3
GO:0070050	GO:0070050	neuron cellular homeostasis	3/724	34/18866	0.140626	0.503562	0.462224	CDK5/SLC8A2/ADORA1	3
GO:0070232	GO:0070232	regulation of T cell apoptotic process	3/724	34/18866	0.140626	0.503562	0.462224	ADAM8/PRKCQ/RAG1	3
GO:1904030	GO:1904030	negative regulation of cyclin-dependent protein kinase activity	3/724	34/18866	0.140626	0.503562	0.462224	CDKN1A/CDKN2B/TNFAIP3	3
GO:2000352	GO:2000352	negative regulation of endothelial cell apoptotic process	3/724	34/18866	0.140626	0.503562	0.462224	ANGPT1/GATA2/TNFAIP3	3
GO:0060047	GO:0060047	heart contraction	15/724	287/18866	0.140986	0.504145	0.462759	AKAP9/CAV1/EDN1/HSPB7/KCNH2/PKP2/PPP1R13L/SLC8A2/SPX/TNNC1/ADORA1/ATP2A1/NOS1AP/SLC1A1/RYR3	15
GO:0099003	GO:0099003	vesicle-mediated transport in synapse	12/724	220/18866	0.140993	0.504145	0.462759	CDK5/DGKQ/GRIN3A/PCDH17/PLAA/PPP3CC/PREPL/RAB27B/RIMS3/SYT1/UNC13B/SLC18A2	12
GO:0009953	GO:0009953	dorsal/ventral pattern formation	6/724	92/18866	0.142068	0.507255	0.465614	CHRD/DISP1/DYNC2H1/EDN1/BMPR1B/GLI3	6
GO:1903321	GO:1903321	negative regulation of protein modification by small protein conjugation or removal	6/724	92/18866	0.142068	0.507255	0.465614	CAV1/CDK5/MIR101-1/PER2/PLAA/TNFAIP3	6
GO:0046834	GO:0046834	lipid phosphorylation	5/724	72/18866	0.142486	0.507279	0.465635	DGKQ/PIK3R6/PIP5K1B/SOCS3/PIP5KL1	5
GO:0051937	GO:0051937	catecholamine transport	5/724	72/18866	0.142486	0.507279	0.465635	SYT1/SYT15/MAPK15/SLC18A2/SLC22A1	5
GO:0061515	GO:0061515	myeloid cell development	5/724	72/18866	0.142486	0.507279	0.465635	DMTN/GATA1/KIT/LTF/TSPAN2	5
GO:1990845	GO:1990845	adaptive thermogenesis	9/724	155/18866	0.142486	0.507279	0.465635	ACHE/CAV1/PDGFC/PER2/PTH2R/FFAR4/VEGFA/ELOVL6/PLCL1	9
GO:0045995	GO:0045995	regulation of embryonic development	8/724	134/18866	0.14387	0.511836	0.469819	B4GALT5/CRB2/FGFR1/GATA1/GATA2/IGF1/SNAI1/TENM4	8
GO:0008154	GO:0008154	actin polymerization or depolymerization	12/724	221/18866	0.144241	0.512789	0.470693	ARHGAP35/DMTN/ESAM/HCK/NCKAP1/PPP1R9A/PTK2B/RASA1/TMOD2/WHAMM/MICAL3/TENM1	12
GO:0032964	GO:0032964	collagen biosynthetic process	4/724	53/18866	0.145264	0.51531	0.473007	ADAMTS3/MYB/TGFB1/EMILIN1	4
GO:0051703	GO:0051703	intraspecies interaction between organisms	4/724	53/18866	0.145264	0.51531	0.473007	DLG4/LTF/NRXN3/SHANK3	4
GO:0061614	GO:0061614	pri-miRNA transcription by RNA polymerase II	4/724	53/18866	0.145264	0.51531	0.473007	FOXO3/GATA2/NFIB/TGFB1	4
GO:0007059	GO:0007059	chromosome segregation	17/724	334/18866	0.145382	0.51536	0.473053	CDC16/CDCA8/CENPK/DSCC1/FAM83D/HORMAD1/KIF14/KPNB1/MAP10/MEIKIN/NDC80/TLK1/TRIP13/ZWINT/AURKC/MAPK15/GEM	17
GO:0001890	GO:0001890	placenta development	9/724	156/18866	0.146426	0.51778	0.475275	E2F7/FGFR2/GATA2/PLG/PTN/SNAI1/SOCS3/ETNK2/TEX19	9
GO:1902904	GO:1902904	negative regulation of supramolecular fiber organization	9/724	156/18866	0.146426	0.51778	0.475275	CRYAB/DMTN/EML2/MAP2/PPP1R9A/TMOD2/EMILIN1/NAV3/SHANK3	9
GO:0061097	GO:0061097	regulation of protein tyrosine kinase activity	6/724	93/18866	0.147286	0.51778	0.475275	CAV1/DLG4/ADORA1/BDNF/STAP1/EGF	6
GO:1903035	GO:1903035	negative regulation of response to wounding	6/724	93/18866	0.147286	0.51778	0.475275	EDN1/GP1BA/PLG/PRKG1/CD34/KRT1	6
GO:0017157	GO:0017157	regulation of exocytosis	12/724	222/18866	0.147529	0.51778	0.475275	CDK5/GATA2/GRIN3A/PREPL/RAB13/RAB27A/RAB27B/RIMS3/SYT1/SYT15/UNC13B/SYTL4	12
GO:0032386	GO:0032386	regulation of intracellular transport	18/724	358/18866	0.148256	0.51778	0.475275	ANGPT1/BAD/CDK5/CRYAB/DMTN/GTSE1/LMAN1/MAP2/PCSK9/PPP3CC/TGFB1/TNNC1/ANK3/ATP2A1/GLI3/MAPK15/PKIA/TENM1	18
GO:0072331	GO:0072331	signal transduction by p53 class mediator	14/724	267/18866	0.148356	0.51778	0.475275	BOP1/CDK5/CDKN1A/DDIT4/E2F7/EEF1E1/FOXO3/GADD45A/GTSE1/MAPK11/PPP1R13L/RBBP7/SNAI1/ACER2	14
GO:0005977	GO:0005977	glycogen metabolic process	5/724	73/18866	0.148469	0.51778	0.475275	GBE1/IGF1/PER2/PYGM/ENPP1	5
GO:0015807	GO:0015807	L-amino acid transport	5/724	73/18866	0.148469	0.51778	0.475275	PER2/SFXN1/SLC25A22/SLC6A9/SLC1A1	5
GO:0051145	GO:0051145	smooth muscle cell differentiation	5/724	73/18866	0.148469	0.51778	0.475275	FGFR2/KIT/NFATC1/ZEB1/VEGFA	5
GO:0072401	GO:0072401	signal transduction involved in DNA integrity checkpoint	5/724	73/18866	0.148469	0.51778	0.475275	CDKN1A/DTL/E2F7/GADD45A/GTSE1	5
GO:0072422	GO:0072422	signal transduction involved in DNA damage checkpoint	5/724	73/18866	0.148469	0.51778	0.475275	CDKN1A/DTL/E2F7/GADD45A/GTSE1	5
GO:0008645	GO:0008645	hexose transmembrane transport	7/724	114/18866	0.1487	0.51778	0.475275	EDN1/IGF1/SLC2A1/SLC2A6/FFAR4/SLC45A1/ENPP1	7
GO:1990748	GO:1990748	cellular detoxification	7/724	114/18866	0.1487	0.51778	0.475275	EPX/HBD/HP/LPO/PTGS1/PXDNL/GSTO2	7
GO:0097193	GO:0097193	intrinsic apoptotic signaling pathway	15/724	290/18866	0.149552	0.51778	0.475275	BAD/BAK1/CAV1/CDKN1A/CHAC1/DAPK2/DDIT4/EPHA2/ERN1/LGALS12/MOAP1/SKIL/SNAI1/TMEM117/ATP2A1	15
GO:0000083	GO:0000083	regulation of transcription involved in G1/S transition of mitotic cell cycle	3/724	35/18866	0.14969	0.51778	0.475275	CDK5/E2F7/CCNA1	3
GO:0009112	GO:0009112	nucleobase metabolic process	3/724	35/18866	0.14969	0.51778	0.475275	CDA/CTPS1/GMPS	3
GO:0014904	GO:0014904	myotube cell development	3/724	35/18866	0.14969	0.51778	0.475275	IGF1/SMYD3/ACTA1	3
GO:0021522	GO:0021522	spinal cord motor neuron differentiation	3/724	35/18866	0.14969	0.51778	0.475275	DYNC2H1/LMO4/GLI3	3
GO:0032228	GO:0032228	regulation of synaptic transmission, GABAergic	3/724	35/18866	0.14969	0.51778	0.475275	ADORA1/BDNF/PLCL1	3
GO:0032801	GO:0032801	receptor catabolic process	3/724	35/18866	0.14969	0.51778	0.475275	CDK5/PCSK9/TGFB1	3
GO:0036314	GO:0036314	response to sterol	3/724	35/18866	0.14969	0.51778	0.475275	GPLD1/INHBA/TGFB1	3
GO:0048333	GO:0048333	mesodermal cell differentiation	3/724	35/18866	0.14969	0.51778	0.475275	FGFR1/FGFR2/INHBA	3
GO:0060251	GO:0060251	regulation of glial cell proliferation	3/724	35/18866	0.14969	0.51778	0.475275	MYB/PRKCH/PTN	3
GO:1901030	GO:1901030	positive regulation of mitochondrial outer membrane permeabilization involved in apoptotic signaling pathway	3/724	35/18866	0.14969	0.51778	0.475275	BAD/BAK1/PPP3CC	3
GO:0051402	GO:0051402	neuron apoptotic process	13/724	245/18866	0.149783	0.51778	0.475275	ADAM8/ANGPT1/CDK5/FOXO3/KIF14/MYB/MYBL2/NTRK1/PCSK9/PTK2B/RASA1/TFAP2A/BDNF	13
GO:0090305	GO:0090305	nucleic acid phosphodiester bond hydrolysis	16/724	313/18866	0.150318	0.51778	0.475275	BOP1/DNASE1/ERN1/EXD3/HORMAD1/KPNB1/LACTB2/PNPT1/POLQ/PXDNL/RRP36/SETMAR/STK31/ENDOD1/RAG1/ENPP1	16
GO:0010766	GO:0010766	negative regulation of sodium ion transport	2/724	18/18866	0.150364	0.51778	0.475275	PCSK9/WNK2	2
GO:0021756	GO:0021756	striatum development	2/724	18/18866	0.150364	0.51778	0.475275	INHBA/SHANK3	2
GO:0032780	GO:0032780	negative regulation of ATPase activity	2/724	18/18866	0.150364	0.51778	0.475275	LTF/PXK	2
GO:0035330	GO:0035330	regulation of hippo signaling	2/724	18/18866	0.150364	0.51778	0.475275	DLG5/SCHIP1	2
GO:0042983	GO:0042983	amyloid precursor protein biosynthetic process	2/724	18/18866	0.150364	0.51778	0.475275	ITM2A/MIR101-1	2
GO:0042984	GO:0042984	regulation of amyloid precursor protein biosynthetic process	2/724	18/18866	0.150364	0.51778	0.475275	ITM2A/MIR101-1	2
GO:0046112	GO:0046112	nucleobase biosynthetic process	2/724	18/18866	0.150364	0.51778	0.475275	CTPS1/GMPS	2
GO:0050961	GO:0050961	detection of temperature stimulus involved in sensory perception	2/724	18/18866	0.150364	0.51778	0.475275	NTRK1/ADORA1	2
GO:0051782	GO:0051782	negative regulation of cell division	2/724	18/18866	0.150364	0.51778	0.475275	E2F7/ORC6	2
GO:0060080	GO:0060080	inhibitory postsynaptic potential	2/724	18/18866	0.150364	0.51778	0.475275	UNC13B/BDNF	2
GO:0060977	GO:0060977	coronary vasculature morphogenesis	2/724	18/18866	0.150364	0.51778	0.475275	TGFBR3/VEGFA	2
GO:0071318	GO:0071318	cellular response to ATP	2/724	18/18866	0.150364	0.51778	0.475275	P2RY2/RYR3	2
GO:0090036	GO:0090036	regulation of protein kinase C signaling	2/724	18/18866	0.150364	0.51778	0.475275	AKAP12/VEGFA	2
GO:0090493	GO:0090493	catecholamine uptake	2/724	18/18866	0.150364	0.51778	0.475275	MAPK15/SLC22A1	2
GO:0002221	GO:0002221	pattern recognition receptor signaling pathway	11/724	201/18866	0.151451	0.52116	0.478377	CAV1/ESR1/LTF/MFHAS1/NOD2/TANK/TICAM1/TNFAIP3/TRIL/TSPAN6/CLEC4E	11
GO:0030857	GO:0030857	negative regulation of epithelial cell differentiation	4/724	54/18866	0.152445	0.523693	0.480702	CAV1/S1PR3/ZEB1/VEGFA	4
GO:2000179	GO:2000179	positive regulation of neural precursor cell proliferation	4/724	54/18866	0.152445	0.523693	0.480702	ADGRG1/GLI3/VEGFA/EGF	4
GO:0050671	GO:0050671	positive regulation of lymphocyte proliferation	8/724	136/18866	0.152505	0.523693	0.480702	CDKN1A/IGF1/MPL/PDCD1LG2/PRKCQ/TICAM1/TNFSF9/VTCN1	8
GO:0060419	GO:0060419	heart growth	7/724	115/18866	0.153475	0.526313	0.483107	EDN1/FGFR1/FGFR2/IGF1/MAPK11/TGFBR3/TENM4	7
GO:0070997	GO:0070997	neuron death	18/724	360/18866	0.153481	0.526313	0.483107	ADAM8/ANGPT1/BAD/CDK5/DDIT4/FOXO3/KIF14/MYB/MYBL2/NTRK1/PCSK9/PTK2B/RASA1/TFAP2A/ADORA1/BDNF/CD34/SLC1A1	18
GO:1903707	GO:1903707	negative regulation of hemopoiesis	9/724	158/18866	0.154469	0.528168	0.48481	GATA2/HOXA9/INHBA/LRRC17/LTF/PGLYRP1/PTK2B/TMEM176A/GLI3	9
GO:0006073	GO:0006073	cellular glucan metabolic process	5/724	74/18866	0.154557	0.528168	0.48481	GBE1/IGF1/PER2/PYGM/ENPP1	5
GO:0006801	GO:0006801	superoxide metabolic process	5/724	74/18866	0.154557	0.528168	0.48481	EDN1/NCF1B/NCF1C/PRG3/TGFB1	5
GO:0044042	GO:0044042	glucan metabolic process	5/724	74/18866	0.154557	0.528168	0.48481	GBE1/IGF1/PER2/PYGM/ENPP1	5
GO:0072395	GO:0072395	signal transduction involved in cell cycle checkpoint	5/724	74/18866	0.154557	0.528168	0.48481	CDKN1A/DTL/E2F7/GADD45A/GTSE1	5
GO:1901605	GO:1901605	alpha-amino acid metabolic process	11/724	202/18866	0.155015	0.529368	0.485911	AFMID/CTPS1/GMPS/HDC/IL4I1/MTAP/NIT2/PYCR1/AGMAT/AMT/FTCD	11
GO:0032273	GO:0032273	positive regulation of protein polymerization	8/724	137/18866	0.156914	0.535112	0.491184	AKAP9/HCK/NCKAP1/PTK2B/SLAIN2/WHAMM/TENM1/NAV3	8
GO:0032946	GO:0032946	positive regulation of mononuclear cell proliferation	8/724	137/18866	0.156914	0.535112	0.491184	CDKN1A/IGF1/MPL/PDCD1LG2/PRKCQ/TICAM1/TNFSF9/VTCN1	8
GO:0019216	GO:0019216	regulation of lipid metabolic process	21/724	431/18866	0.157162	0.535586	0.491619	CAV1/CD19/DDX20/DGKQ/EDF1/GPLD1/HCAR2/KIT/KPNB1/LGALS12/NOD2/PIK3R6/PTK2B/RAB38/SNAI1/SOCS3/TGFB1/ADORA1/DKKL1/HPGD/ELOVL6	21
GO:0003073	GO:0003073	regulation of systemic arterial blood pressure	6/724	95/18866	0.157977	0.536816	0.492748	CTSG/EDN1/ENPEP/SPX/ADORA1/NPPB	6
GO:0007589	GO:0007589	body fluid secretion	6/724	95/18866	0.157977	0.536816	0.492748	CAV1/EDN1/P2RY2/ADORA1/NPPB/VEGFA	6
GO:0045638	GO:0045638	negative regulation of myeloid cell differentiation	6/724	95/18866	0.157977	0.536816	0.492748	GATA2/HOXA9/INHBA/LRRC17/LTF/PTK2B	6
GO:0051668	GO:0051668	localization within membrane	6/724	95/18866	0.157977	0.536816	0.492748	CDK5/CRKL/DLG4/ITGB7/PTN/SHANK3	6
GO:0015749	GO:0015749	monosaccharide transmembrane transport	7/724	116/18866	0.15832	0.536816	0.492748	EDN1/IGF1/SLC2A1/SLC2A6/FFAR4/SLC45A1/ENPP1	7
GO:0010092	GO:0010092	specification of animal organ identity	3/724	36/18866	0.158936	0.536816	0.492748	FGFR1/FGFR2/GLI3	3
GO:0021955	GO:0021955	central nervous system neuron axonogenesis	3/724	36/18866	0.158936	0.536816	0.492748	ARHGAP35/B4GALT5/NFIB	3
GO:0042491	GO:0042491	inner ear auditory receptor cell differentiation	3/724	36/18866	0.158936	0.536816	0.492748	FGFR1/TPRN/MCOLN3	3
GO:0042554	GO:0042554	superoxide anion generation	3/724	36/18866	0.158936	0.536816	0.492748	EDN1/PRG3/TGFB1	3
GO:0051973	GO:0051973	positive regulation of telomerase activity	3/724	36/18866	0.158936	0.536816	0.492748	PARM1/PRKCQ/MAPK15	3
GO:0090313	GO:0090313	regulation of protein targeting to membrane	3/724	36/18866	0.158936	0.536816	0.492748	CDK5/DMTN/ANK3	3
GO:2000310	GO:2000310	regulation of NMDA receptor activity	3/724	36/18866	0.158936	0.536816	0.492748	DLG4/PTK2B/SLC6A9	3
GO:2000516	GO:2000516	positive regulation of CD4-positive, alpha-beta T cell activation	3/724	36/18866	0.158936	0.536816	0.492748	MYB/PRKCQ/CD160	3
GO:0051656	GO:0051656	establishment of organelle localization	21/724	432/18866	0.159614	0.537388	0.493273	AGBL4/CDCA8/CDK5/F5/FAM83D/GATA2/KIF14/KIT/KPNB1/LIN7A/LMAN1/MAP2/NDC80/RAB27A/RAB27B/TRAK2/UCHL1/CNIH3/MAPK15/GEM/MREG	21
GO:0001706	GO:0001706	endoderm formation	4/724	55/18866	0.159758	0.537388	0.493273	COL6A1/INHBA/COL8A1/HNF1B	4
GO:0032720	GO:0032720	negative regulation of tumor necrosis factor production	4/724	55/18866	0.159758	0.537388	0.493273	BPI/IGF1/TNFAIP3/CD34	4
GO:0051353	GO:0051353	positive regulation of oxidoreductase activity	4/724	55/18866	0.159758	0.537388	0.493273	EDN1/NOD2/PTK2B/NOS1AP	4
GO:0060350	GO:0060350	endochondral bone morphogenesis	4/724	55/18866	0.159758	0.537388	0.493273	RUNX2/TMEM119/BMPR1B/MMP16	4
GO:0097345	GO:0097345	mitochondrial outer membrane permeabilization	4/724	55/18866	0.159758	0.537388	0.493273	BAD/BAK1/MOAP1/PPP3CC	4
GO:1900076	GO:1900076	regulation of cellular response to insulin stimulus	5/724	75/18866	0.160747	0.540345	0.495987	GPLD1/PRKCQ/SOCS3/TRIM72/ENPP1	5
GO:0062012	GO:0062012	regulation of small molecule metabolic process	22/724	456/18866	0.161099	0.54116	0.496735	BAD/CAV1/CDA/DDIT4/DGKQ/GPLD1/IGF1/KIT/KPNB1/MIDN/POM121/PPTC7/PTK2B/SDHAF3/SLC2A6/SNAI1/TGFB1/DKKL1/HPGD/EGF/ELOVL6/ENPP1	22
GO:0001508	GO:0001508	action potential	8/724	138/18866	0.161383	0.541379	0.496937	AKAP9/CAV1/KCNH2/NRCAM/PKP2/SLC8A2/ANK3/NOS1AP	8
GO:0098754	GO:0098754	detoxification	8/724	138/18866	0.161383	0.541379	0.496937	EPX/HBD/HP/LPO/PTGS1/PXDNL/GSTO2/MT1F	8
GO:0031109	GO:0031109	microtubule polymerization or depolymerization	7/724	117/18866	0.163234	0.542769	0.498213	AKAP9/CEP192/CRYAB/EML2/MAP2/SLAIN2/NAV3	7
GO:1904019	GO:1904019	epithelial cell apoptotic process	7/724	117/18866	0.163234	0.542769	0.498213	ANGPT1/BAD/FOXO3/GATA2/MIR101-1/TNFAIP3/CD160	7
GO:0002690	GO:0002690	positive regulation of leukocyte chemotaxis	6/724	96/18866	0.163446	0.542769	0.498213	CXCL8/DAPK2/EDN1/PTK2B/PTN/VEGFA	6
GO:0001991	GO:0001991	regulation of systemic arterial blood pressure by circulatory renin-angiotensin	2/724	19/18866	0.163996	0.542769	0.498213	CTSG/ENPEP	2
GO:0002076	GO:0002076	osteoblast development	2/724	19/18866	0.163996	0.542769	0.498213	ACHE/RUNX2	2
GO:0006670	GO:0006670	sphingosine metabolic process	2/724	19/18866	0.163996	0.542769	0.498213	SPTLC1/ACER2	2
GO:0019054	GO:0019054	modulation by virus of host cellular process	2/724	19/18866	0.163996	0.542769	0.498213	BAD/KPNB1	2
GO:0030150	GO:0030150	protein import into mitochondrial matrix	2/724	19/18866	0.163996	0.542769	0.498213	GRPEL2/TIMM23	2
GO:0032026	GO:0032026	response to magnesium ion	2/724	19/18866	0.163996	0.542769	0.498213	ANK3/RYR3	2
GO:0045956	GO:0045956	positive regulation of calcium ion-dependent exocytosis	2/724	19/18866	0.163996	0.542769	0.498213	CDK5/SYT1	2
GO:0046653	GO:0046653	tetrahydrofolate metabolic process	2/724	19/18866	0.163996	0.542769	0.498213	ALDH1L2/FTCD	2
GO:0060252	GO:0060252	positive regulation of glial cell proliferation	2/724	19/18866	0.163996	0.542769	0.498213	MYB/PRKCH	2
GO:0070233	GO:0070233	negative regulation of T cell apoptotic process	2/724	19/18866	0.163996	0.542769	0.498213	PRKCQ/RAG1	2
GO:0070989	GO:0070989	oxidative demethylation	2/724	19/18866	0.163996	0.542769	0.498213	FTO/TET1	2
GO:0071800	GO:0071800	podosome assembly	2/724	19/18866	0.163996	0.542769	0.498213	BIN2/HCK	2
GO:0097320	GO:0097320	plasma membrane tubulation	2/724	19/18866	0.163996	0.542769	0.498213	BIN2/WHAMM	2
GO:0098543	GO:0098543	detection of other organism	2/724	19/18866	0.163996	0.542769	0.498213	NOD2/PGLYRP1	2
GO:0098915	GO:0098915	membrane repolarization during ventricular cardiac muscle cell action potential	2/724	19/18866	0.163996	0.542769	0.498213	KCNH2/NOS1AP	2
GO:1903975	GO:1903975	regulation of glial cell migration	2/724	19/18866	0.163996	0.542769	0.498213	CRKL/STAP1	2
GO:2000647	GO:2000647	negative regulation of stem cell proliferation	2/724	19/18866	0.163996	0.542769	0.498213	PTN/BDNF	2
GO:0009636	GO:0009636	response to toxic substance	13/724	250/18866	0.166081	0.549302	0.504209	BAK1/CDKN1A/EPX/HBD/HP/LPO/PPP1R9A/PTGS1/PXDNL/GSTO2/MT1F/SLC18A2/TRPM6	13
GO:0001959	GO:0001959	regulation of cytokine-mediated signaling pathway	10/724	183/18866	0.16683	0.550045	0.504891	ANGPT1/CAV1/EDN1/PADI2/SOCS3/TNFAIP3/TRADD/TRAIP/C1QTNF4/STAP1	10
GO:0033555	GO:0033555	multicellular organismal response to stress	5/724	76/18866	0.167035	0.550045	0.504891	DPP4/NTRK1/BDNF/LYPD1/RAG1	5
GO:0060415	GO:0060415	muscle tissue morphogenesis	5/724	76/18866	0.167035	0.550045	0.504891	FGFR2/PKP2/TGFB1/TGFBR3/TNNC1	5
GO:0006977	GO:0006977	DNA damage response, signal transduction by p53 class mediator resulting in cell cycle arrest	4/724	56/18866	0.167197	0.550045	0.504891	CDKN1A/E2F7/GADD45A/GTSE1	4
GO:0031529	GO:0031529	ruffle organization	4/724	56/18866	0.167197	0.550045	0.504891	CAV1/PLEKHA1/EPS8L3/STAP1	4
GO:0050732	GO:0050732	negative regulation of peptidyl-tyrosine phosphorylation	4/724	56/18866	0.167197	0.550045	0.504891	CAV1/DMTN/SEMA4D/SOCS3	4
GO:0060563	GO:0060563	neuroepithelial cell differentiation	4/724	56/18866	0.167197	0.550045	0.504891	B9D1/FGFR1/TPRN/MCOLN3	4
GO:0086002	GO:0086002	cardiac muscle cell action potential involved in contraction	4/724	56/18866	0.167197	0.550045	0.504891	CAV1/KCNH2/PKP2/NOS1AP	4
GO:0007052	GO:0007052	mitotic spindle organization	7/724	118/18866	0.168216	0.550904	0.50568	CEP192/KPNB1/MAP10/MYBL2/NDC80/TACC2/AURKC	7
GO:0034219	GO:0034219	carbohydrate transmembrane transport	7/724	118/18866	0.168216	0.550904	0.50568	EDN1/IGF1/SLC2A1/SLC2A6/FFAR4/SLC45A1/ENPP1	7
GO:0006699	GO:0006699	bile acid biosynthetic process	3/724	37/18866	0.16835	0.550904	0.50568	ACOT8/OSBPL6/CYP27A1	3
GO:0045730	GO:0045730	respiratory burst	3/724	37/18866	0.16835	0.550904	0.50568	HCK/NCF1B/NCF1C	3
GO:0048846	GO:0048846	axon extension involved in axon guidance	3/724	37/18866	0.16835	0.550904	0.50568	SEMA4D/SEMA6B/VEGFA	3
GO:0062208	GO:0062208	positive regulation of pattern recognition receptor signaling pathway	3/724	37/18866	0.16835	0.550904	0.50568	CAV1/LTF/MFHAS1	3
GO:0090050	GO:0090050	positive regulation of cell migration involved in sprouting angiogenesis	3/724	37/18866	0.16835	0.550904	0.50568	GATA2/MIR101-1/VEGFA	3
GO:1902284	GO:1902284	neuron projection extension involved in neuron projection guidance	3/724	37/18866	0.16835	0.550904	0.50568	SEMA4D/SEMA6B/VEGFA	3
GO:0098659	GO:0098659	inorganic cation import across plasma membrane	6/724	97/18866	0.168995	0.551261	0.506007	HFE/KCNH2/SLC12A1/SLC8A2/WNK2/KCNJ16	6
GO:0099587	GO:0099587	inorganic ion import across plasma membrane	6/724	97/18866	0.168995	0.551261	0.506007	HFE/KCNH2/SLC12A1/SLC8A2/WNK2/KCNJ16	6
GO:1990823	GO:1990823	response to leukemia inhibitory factor	6/724	97/18866	0.168995	0.551261	0.506007	MSC/MYBL2/PADI2/PCOLCE/SOCS3/SRSF7	6
GO:1990830	GO:1990830	cellular response to leukemia inhibitory factor	6/724	97/18866	0.168995	0.551261	0.506007	MSC/MYBL2/PADI2/PCOLCE/SOCS3/SRSF7	6
GO:0014706	GO:0014706	striated muscle tissue development	19/724	389/18866	0.169018	0.551261	0.506007	CAV1/CDK5/EDN1/FGFR1/FGFR2/HIVEP3/IGF1/MAPK11/MSC/MYL6B/NRAP/PKP2/PPP1R13L/TGFB1/TGFBR3/TNNC1/ACTA1/VEGFA/TENM4	19
GO:0003015	GO:0003015	heart process	15/724	297/18866	0.170602	0.556061	0.510413	AKAP9/CAV1/EDN1/HSPB7/KCNH2/PKP2/PPP1R13L/SLC8A2/SPX/TNNC1/ADORA1/ATP2A1/NOS1AP/SLC1A1/RYR3	15
GO:0002695	GO:0002695	negative regulation of leukocyte activation	10/724	184/18866	0.170804	0.556353	0.510681	BPI/CLNK/DLG5/HFE/INHBA/PDCD1LG2/PGLYRP1/TNFAIP3/GLI3/VTCN1	10
GO:1903305	GO:1903305	regulation of regulated secretory pathway	9/724	162/18866	0.171183	0.557219	0.511476	CDK5/GATA2/GRIN3A/PREPL/RAB27A/RIMS3/SYT1/SYT15/UNC13B	9
GO:0048762	GO:0048762	mesenchymal cell differentiation	12/724	229/18866	0.171625	0.557502	0.511736	BAMBI/CRB2/DLG5/EDN1/FAM83D/FGFR1/FGFR2/SEMA4D/SEMA6B/SNAI1/TGFB1/TGFBR3	12
GO:0050807	GO:0050807	regulation of synapse organization	12/724	229/18866	0.171625	0.557502	0.511736	CDK5/CRKL/DLG5/NRCAM/NTRK1/PPP1R9A/PTN/SEMA4D/SIPA1L1/ADGRL3/BDNF/SHANK3	12
GO:0051648	GO:0051648	vesicle localization	12/724	229/18866	0.171625	0.557502	0.511736	CDK5/F5/LIN7A/LMAN1/MAP2/PCDH17/RAB27A/RAB27B/TRAK2/CNIH3/MAPK15/MREG	12
GO:0031331	GO:0031331	positive regulation of cellular catabolic process	19/724	390/18866	0.171721	0.557502	0.511736	ADAM8/AGBL4/BAD/CAV1/FOXO3/FTO/GPLD1/IGF1/MEFV/PCSK9/PNPT1/PTK2B/RNF14/SPTLC1/SUPV3L1/TICAM1/TNFAIP3/RUFY4/EGF	19
GO:0007422	GO:0007422	peripheral nervous system development	5/724	77/18866	0.173419	0.562551	0.51637	CDK5/EGR3/PMP22/SERPINI1/BDNF	5
GO:0007281	GO:0007281	germ cell development	14/724	275/18866	0.173504	0.562551	0.51637	DDX20/FOXO3/HORMAD1/IGF1/KIT/PANX1/PTK2B/PTN/TRIP13/WDR77/AURKC/BMPR1B/OCA2/DPY19L2	14
GO:0006942	GO:0006942	regulation of striated muscle contraction	6/724	98/18866	0.174622	0.563279	0.517039	AKAP9/CAV1/PKP2/ADORA1/ATP2A1/NOS1AP	6
GO:0030316	GO:0030316	osteoclast differentiation	6/724	98/18866	0.174622	0.563279	0.517039	EPHA2/KLF10/LRRC17/LTF/MITF/OSCAR	6
GO:0050810	GO:0050810	regulation of steroid biosynthetic process	6/724	98/18866	0.174622	0.563279	0.517039	DDX20/DGKQ/KPNB1/SNAI1/DKKL1/ELOVL6	6
GO:0021515	GO:0021515	cell differentiation in spinal cord	4/724	57/18866	0.174756	0.563279	0.517039	DYNC2H1/GATA2/LMO4/GLI3	4
GO:0045840	GO:0045840	positive regulation of mitotic nuclear division	4/724	57/18866	0.174756	0.563279	0.517039	CDC16/EDN1/IGF1/EGF	4
GO:0046854	GO:0046854	phosphatidylinositol phosphorylation	4/724	57/18866	0.174756	0.563279	0.517039	PIK3R6/PIP5K1B/SOCS3/PIP5KL1	4
GO:0048016	GO:0048016	inositol phosphate-mediated signaling	4/724	57/18866	0.174756	0.563279	0.517039	EDN1/IGF1/NFATC1/PPP3CC	4
GO:0072431	GO:0072431	signal transduction involved in mitotic G1 DNA damage checkpoint	4/724	57/18866	0.174756	0.563279	0.517039	CDKN1A/E2F7/GADD45A/GTSE1	4
GO:1902400	GO:1902400	intracellular signal transduction involved in G1 DNA damage checkpoint	4/724	57/18866	0.174756	0.563279	0.517039	CDKN1A/E2F7/GADD45A/GTSE1	4
GO:0051495	GO:0051495	positive regulation of cytoskeleton organization	12/724	230/18866	0.175217	0.564276	0.517954	AKAP9/CDK5/EDN1/HCK/NCKAP1/PTK2B/SLAIN2/WHAMM/MAPK15/STAP1/TENM1/NAV3	12
GO:0071456	GO:0071456	cellular response to hypoxia	11/724	208/18866	0.177278	0.564276	0.517954	ADAM8/BAD/CITED2/EDN1/FOXO3/KCNMB1/MPL/PTN/TRPC6/CD34/VEGFA	11
GO:0002418	GO:0002418	immune response to tumor cell	2/724	20/18866	0.177834	0.564276	0.517954	CD226/CD160	2
GO:0003085	GO:0003085	negative regulation of systemic arterial blood pressure	2/724	20/18866	0.177834	0.564276	0.517954	ADORA1/NPPB	2
GO:0006450	GO:0006450	regulation of translational fidelity	2/724	20/18866	0.177834	0.564276	0.517954	AARS2/YRDC	2
GO:0006743	GO:0006743	ubiquinone metabolic process	2/724	20/18866	0.177834	0.564276	0.517954	AIFM2/PPTC7	2
GO:0007350	GO:0007350	blastoderm segmentation	2/724	20/18866	0.177834	0.564276	0.517954	TDGF1/WDR77	2
GO:0030903	GO:0030903	notochord development	2/724	20/18866	0.177834	0.564276	0.517954	CRB2/EPHA2	2
GO:0031498	GO:0031498	chromatin disassembly	2/724	20/18866	0.177834	0.564276	0.517954	PADI2/NFE2	2
GO:0032495	GO:0032495	response to muramyl dipeptide	2/724	20/18866	0.177834	0.564276	0.517954	NOD2/TNFAIP3	2
GO:0042474	GO:0042474	middle ear morphogenesis	2/724	20/18866	0.177834	0.564276	0.517954	EDN1/FGFR1	2
GO:0045019	GO:0045019	negative regulation of nitric oxide biosynthetic process	2/724	20/18866	0.177834	0.564276	0.517954	CAV1/CD34	2
GO:0046931	GO:0046931	pore complex assembly	2/724	20/18866	0.177834	0.564276	0.517954	AHCTF1/BAD	2
GO:0048670	GO:0048670	regulation of collateral sprouting	2/724	20/18866	0.177834	0.564276	0.517954	SEMA4D/BDNF	2
GO:0060546	GO:0060546	negative regulation of necroptotic process	2/724	20/18866	0.177834	0.564276	0.517954	CAV1/MIR101-1	2
GO:0060965	GO:0060965	negative regulation of gene silencing by miRNA	2/724	20/18866	0.177834	0.564276	0.517954	ESR1/TGFB1	2
GO:0062099	GO:0062099	negative regulation of programmed necrotic cell death	2/724	20/18866	0.177834	0.564276	0.517954	CAV1/MIR101-1	2
GO:0070932	GO:0070932	histone H3 deacetylation	2/724	20/18866	0.177834	0.564276	0.517954	PER1/PER2	2
GO:0071636	GO:0071636	positive regulation of transforming growth factor beta production	2/724	20/18866	0.177834	0.564276	0.517954	MYB/CD34	2
GO:0097734	GO:0097734	extracellular exosome biogenesis	2/724	20/18866	0.177834	0.564276	0.517954	RAB27A/CD34	2
GO:1904406	GO:1904406	negative regulation of nitric oxide metabolic process	2/724	20/18866	0.177834	0.564276	0.517954	CAV1/CD34	2
GO:0010591	GO:0010591	regulation of lamellipodium assembly	3/724	38/18866	0.177922	0.564276	0.517954	DMTN/EPHA2/NCKAP1	3
GO:0043029	GO:0043029	T cell homeostasis	3/724	38/18866	0.177922	0.564276	0.517954	GPR174/SIT1/RAG1	3
GO:0060045	GO:0060045	positive regulation of cardiac muscle cell proliferation	3/724	38/18866	0.177922	0.564276	0.517954	FGFR1/FGFR2/TGFBR3	3
GO:1905898	GO:1905898	positive regulation of response to endoplasmic reticulum stress	3/724	38/18866	0.177922	0.564276	0.517954	BAK1/CAV1/ERN1	3
GO:0009259	GO:0009259	ribonucleotide metabolic process	20/724	416/18866	0.178718	0.566437	0.519937	ACOT7/ACOT8/ACSM1/ACSM3/BAD/CTPS1/DBI/DDIT4/ELOVL7/EPHA2/GMPS/HACD1/IGF1/POM121/SLC2A6/TGFB1/GUCY1A2/NPPB/ELOVL6/ENPP1	20
GO:0007265	GO:0007265	Ras protein signal transduction	17/724	346/18866	0.179061	0.567159	0.5206	ADGRG1/ARHGAP35/ARHGEF3/CDKN1A/CRKL/GPR174/IGF1/KIF14/KPNB1/MAPK11/NCKAP1/NTRK1/PLEKHG5/RAPGEF6/RASA1/RHOH/EPS8L3	17
GO:0051056	GO:0051056	regulation of small GTPase mediated signal transduction	16/724	323/18866	0.179694	0.567615	0.521019	ADGRG1/ARHGAP32/ARHGAP35/ARHGAP8/ARHGEF3/CRKL/GPR174/IGF1/KIF14/NTRK1/PLEKHG5/RASA1/RHOH/SIPA1L1/SOS2/EPS8L3	16
GO:0007224	GO:0007224	smoothened signaling pathway	8/724	142/18866	0.179837	0.567615	0.521019	B9D1/DLG5/DYNC2H1/FGFR2/RUNX2/GLI3/ENPP1/EVC2	8
GO:0031333	GO:0031333	negative regulation of protein-containing complex assembly	8/724	142/18866	0.179837	0.567615	0.521019	CRYAB/DMTN/EML2/KIF14/LMO4/MAP2/MEFV/TMOD2	8
GO:0043535	GO:0043535	regulation of blood vessel endothelial cell migration	9/724	164/18866	0.179843	0.567615	0.521019	ANGPT1/EPHA2/FGFR1/GADD45A/GATA2/MIR101-1/TGFB1/CARD10/VEGFA	9
GO:0043900	GO:0043900	regulation of multi-organism process	5/724	78/18866	0.179894	0.567615	0.521019	IGF1/INHBA/PTGDR2/VEGFA/CCDC87	5
GO:0060998	GO:0060998	regulation of dendritic spine development	5/724	78/18866	0.179894	0.567615	0.521019	CDK5/DLG5/PPP1R9A/SIPA1L1/SHANK3	5
GO:0015837	GO:0015837	amine transport	6/724	99/18866	0.180324	0.568245	0.521597	AQP9/PER2/SYT1/SYT15/ADORA1/SLC18A2	6
GO:0050830	GO:0050830	defense response to Gram-positive bacterium	6/724	99/18866	0.180324	0.568245	0.521597	CAMP/CTSG/DEFA3/DEFA4/EPHA2/PGLYRP1	6
GO:1904951	GO:1904951	positive regulation of establishment of protein localization	18/724	370/18866	0.181083	0.570273	0.523459	ACHE/ADAM8/BAD/CDK5/GPLD1/GTSE1/HCAR2/IGF1/PANX1/PPP3CC/TGFB1/UNC13B/ANK3/CD34/CLEC4E/GLI3/TENM1/SYTL4	18
GO:0002043	GO:0002043	blood vessel endothelial cell proliferation involved in sprouting angiogenesis	4/724	58/18866	0.182429	0.57294	0.525907	EPHA2/GATA2/MIR101-1/VEGFA	4
GO:0002886	GO:0002886	regulation of myeloid leukocyte mediated immunity	4/724	58/18866	0.182429	0.57294	0.525907	DNASE1/GATA2/TICAM1/STAP1	4
GO:0031638	GO:0031638	zymogen activation	4/724	58/18866	0.182429	0.57294	0.525907	BAD/BAK1/HP/PRSS12	4
GO:1902099	GO:1902099	regulation of metaphase/anaphase transition of cell cycle	4/724	58/18866	0.182429	0.57294	0.525907	CDC16/NDC80/TRIP13/MAPK15	4
GO:0030595	GO:0030595	leukocyte chemotaxis	12/724	232/18866	0.18251	0.57294	0.525907	ADAM8/CXCL8/DAPK2/DPP4/EDN1/KIT/PADI2/PTK2B/PTN/S100A12/STAP1/VEGFA	12
GO:0010632	GO:0010632	regulation of epithelial cell migration	15/724	301/18866	0.183276	0.574978	0.527777	ANGPT1/EDN1/EPHA2/FGFR1/GADD45A/GATA2/GPLD1/MIR101-1/PTK2B/PTN/PTPRM/TDGF1/TGFB1/CARD10/VEGFA	15
GO:0010906	GO:0010906	regulation of glucose metabolic process	7/724	121/18866	0.183552	0.575478	0.528236	BAD/DGKQ/GPLD1/IGF1/MIDN/SDHAF3/ENPP1	7
GO:0045598	GO:0045598	regulation of fat cell differentiation	8/724	143/18866	0.18459	0.578366	0.530887	FTO/GATA2/LGALS12/TGFB1/TPH1/DKKL1/FFAR4/ENPP1	8
GO:0002702	GO:0002702	positive regulation of production of molecular mediator of immune response	6/724	100/18866	0.1861	0.580425	0.532777	CD226/CLNK/NOD2/TGFB1/TICAM1/CD160	6
GO:0070301	GO:0070301	cellular response to hydrogen peroxide	6/724	100/18866	0.1861	0.580425	0.532777	FOXO3/MYB/PLEKHA1/PYCR1/TNFAIP3/TRPC6	6
GO:0010827	GO:0010827	regulation of glucose transmembrane transport	5/724	79/18866	0.186459	0.580425	0.532777	EDN1/IGF1/SLC2A1/FFAR4/ENPP1	5
GO:0016575	GO:0016575	histone deacetylation	5/724	79/18866	0.186459	0.580425	0.532777	MIER1/PER1/PER2/ZNF541/VEGFA	5
GO:0021675	GO:0021675	nerve development	5/724	79/18866	0.186459	0.580425	0.532777	NTRK1/TFAP2A/UNC13B/BDNF/GLI3	5
GO:0008016	GO:0008016	regulation of heart contraction	13/724	256/18866	0.186766	0.580425	0.532777	AKAP9/CAV1/EDN1/HSPB7/KCNH2/PKP2/SLC8A2/SPX/ADORA1/ATP2A1/NOS1AP/SLC1A1/RYR3	13
GO:0000578	GO:0000578	embryonic axis specification	3/724	39/18866	0.187638	0.580425	0.532777	TBX6/TDGF1/WDR77	3
GO:0001825	GO:0001825	blastocyst formation	3/724	39/18866	0.187638	0.580425	0.532777	SKIL/HNF1B/TET1	3
GO:0010737	GO:0010737	protein kinase A signaling	3/724	39/18866	0.187638	0.580425	0.532777	AKAP1/AKAP12/RAB13	3
GO:0030049	GO:0030049	muscle filament sliding	3/724	39/18866	0.187638	0.580425	0.532777	MYL6B/TNNC1/ACTA1	3
GO:0030866	GO:0030866	cortical actin cytoskeleton organization	3/724	39/18866	0.187638	0.580425	0.532777	CDK5/NCKAP1/RAB13	3
GO:0031076	GO:0031076	embryonic camera-type eye development	3/724	39/18866	0.187638	0.580425	0.532777	PPP1R13L/TFAP2A/ZEB1	3
GO:0031111	GO:0031111	negative regulation of microtubule polymerization or depolymerization	3/724	39/18866	0.187638	0.580425	0.532777	EML2/MAP2/NAV3	3
GO:0032660	GO:0032660	regulation of interleukin-17 production	3/724	39/18866	0.187638	0.580425	0.532777	NOD2/PRKCQ/TGFB1	3
GO:0033275	GO:0033275	actin-myosin filament sliding	3/724	39/18866	0.187638	0.580425	0.532777	MYL6B/TNNC1/ACTA1	3
GO:0035886	GO:0035886	vascular associated smooth muscle cell differentiation	3/724	39/18866	0.187638	0.580425	0.532777	KIT/NFATC1/VEGFA	3
GO:0071709	GO:0071709	membrane assembly	3/724	39/18866	0.187638	0.580425	0.532777	CAV1/ANK3/DMKN	3
GO:0003012	GO:0003012	muscle system process	22/724	467/18866	0.188786	0.580425	0.532777	AKAP9/CAV1/CRYAB/EDN1/FOXO3/IGF1/KCNH2/KIT/MYL6B/PKP2/PPP1R13L/PRKG1/SMTN/SPX/TMOD2/TNNC1/TRIM72/ACTA1/ADORA1/ATP2A1/FBXO32/NOS1AP	22
GO:0045471	GO:0045471	response to ethanol	7/724	122/18866	0.188789	0.580425	0.532777	BAD/BAK1/FGFR2/GRIN3A/KCNMB1/PTK2B/HPGD	7
GO:1990266	GO:1990266	neutrophil migration	7/724	122/18866	0.188789	0.580425	0.532777	ADAM8/CXCL8/DAPK2/DPP4/EDN1/RHOH/S100A12	7
GO:0050679	GO:0050679	positive regulation of epithelial cell proliferation	11/724	211/18866	0.188948	0.580425	0.532777	BAD/EGR3/FGFR1/FGFR2/GATA2/IGF1/MIR101-1/NOD2/PTN/TNFAIP3/VEGFA	11
GO:0050921	GO:0050921	positive regulation of chemotaxis	8/724	144/18866	0.189396	0.580425	0.532777	CXCL8/DAPK2/EDN1/FGFR1/PTK2B/PTN/TGFB1/VEGFA	8
GO:1903522	GO:1903522	regulation of blood circulation	15/724	303/18866	0.189782	0.580425	0.532777	AKAP9/CAV1/EDN1/HSPB7/KCNH2/PER2/PKP2/SLC8A2/SPX/ADORA1/ATP2A1/NOS1AP/SLC1A1/PTGER2/RYR3	15
GO:0042306	GO:0042306	regulation of protein import into nucleus	4/724	59/18866	0.190212	0.580425	0.532777	ANGPT1/TGFB1/GLI3/PKIA	4
GO:0043030	GO:0043030	regulation of macrophage activation	4/724	59/18866	0.190212	0.580425	0.532777	BPI/IL1RL1/MFHAS1/STAP1	4
GO:0046456	GO:0046456	icosanoid biosynthetic process	4/724	59/18866	0.190212	0.580425	0.532777	EDN1/PRG3/PTGS1/HPGD	4
GO:0050707	GO:0050707	regulation of cytokine secretion	4/724	59/18866	0.190212	0.580425	0.532777	PANX1/CD34/CLEC4E/FFAR4	4
GO:0060043	GO:0060043	regulation of cardiac muscle cell proliferation	4/724	59/18866	0.190212	0.580425	0.532777	FGFR1/FGFR2/MAPK11/TGFBR3	4
GO:0072413	GO:0072413	signal transduction involved in mitotic cell cycle checkpoint	4/724	59/18866	0.190212	0.580425	0.532777	CDKN1A/E2F7/GADD45A/GTSE1	4
GO:1902402	GO:1902402	signal transduction involved in mitotic DNA damage checkpoint	4/724	59/18866	0.190212	0.580425	0.532777	CDKN1A/E2F7/GADD45A/GTSE1	4
GO:1902403	GO:1902403	signal transduction involved in mitotic DNA integrity checkpoint	4/724	59/18866	0.190212	0.580425	0.532777	CDKN1A/E2F7/GADD45A/GTSE1	4
GO:0030072	GO:0030072	peptide hormone secretion	13/724	257/18866	0.190328	0.580425	0.532777	BAD/DPP4/EDN1/GPLD1/HFE/MIDN/PER2/SLC16A2/SLC2A1/FFAR4/HNF1B/KCNS3/SYTL4	13
GO:1901342	GO:1901342	regulation of vasculature development	21/724	444/18866	0.190641	0.580425	0.532777	CXCL8/EPHA2/GADD45A/GATA2/KIT/MIR101-1/NFATC1/PIK3R6/PTK2B/PTN/PTPRM/STAB1/TNFAIP3/TNFRSF12A/CARD10/CD160/CD34/EMILIN1/KRT1/NPPB/VEGFA	21
GO:0046942	GO:0046942	carboxylic acid transport	17/724	350/18866	0.191101	0.580425	0.532777	AQP9/EDN1/PER2/SFXN1/SLC10A7/SLC16A2/SLC25A20/SLC25A22/SLC2A1/SLC6A9/SPX/SYT1/UNC13B/ADORA1/BDNF/OCA2/SLC1A1	17
GO:0001502	GO:0001502	cartilage condensation	2/724	21/18866	0.191843	0.580425	0.532777	BMP1/BMPR1B	2
GO:0006833	GO:0006833	water transport	2/724	21/18866	0.191843	0.580425	0.532777	AQP11/AQP9	2
GO:0006837	GO:0006837	serotonin transport	2/724	21/18866	0.191843	0.580425	0.532777	SLC18A2/SLC22A1	2
GO:0007130	GO:0007130	synaptonemal complex assembly	2/724	21/18866	0.191843	0.580425	0.532777	HORMAD1/TRIP13	2
GO:0009110	GO:0009110	vitamin biosynthetic process	2/724	21/18866	0.191843	0.580425	0.532777	SNAI1/CYP27A1	2
GO:0014821	GO:0014821	phasic smooth muscle contraction	2/724	21/18866	0.191843	0.580425	0.532777	EDN1/KIT	2
GO:0032288	GO:0032288	myelin assembly	2/724	21/18866	0.191843	0.580425	0.532777	PMP22/TENM4	2
GO:0046519	GO:0046519	sphingoid metabolic process	2/724	21/18866	0.191843	0.580425	0.532777	SPTLC1/ACER2	2
GO:0060008	GO:0060008	Sertoli cell differentiation	2/724	21/18866	0.191843	0.580425	0.532777	NTRK1/RAB13	2
GO:0060065	GO:0060065	uterus development	2/724	21/18866	0.191843	0.580425	0.532777	ESR1/HOXA9	2
GO:0060117	GO:0060117	auditory receptor cell development	2/724	21/18866	0.191843	0.580425	0.532777	FGFR1/TPRN	2
GO:0060713	GO:0060713	labyrinthine layer morphogenesis	2/724	21/18866	0.191843	0.580425	0.532777	FGFR2/SOCS3	2
GO:0071397	GO:0071397	cellular response to cholesterol	2/724	21/18866	0.191843	0.580425	0.532777	GPLD1/INHBA	2
GO:0072574	GO:0072574	hepatocyte proliferation	2/724	21/18866	0.191843	0.580425	0.532777	PTN/TNFAIP3	2
GO:0072575	GO:0072575	epithelial cell proliferation involved in liver morphogenesis	2/724	21/18866	0.191843	0.580425	0.532777	PTN/TNFAIP3	2
GO:1902307	GO:1902307	positive regulation of sodium ion transmembrane transport	2/724	21/18866	0.191843	0.580425	0.532777	WNK2/ANK3	2
GO:1903055	GO:1903055	positive regulation of extracellular matrix organization	2/724	21/18866	0.191843	0.580425	0.532777	TGFB1/EMILIN1	2
GO:1903817	GO:1903817	negative regulation of voltage-gated potassium channel activity	2/724	21/18866	0.191843	0.580425	0.532777	CAV1/ANK3	2
GO:2000047	GO:2000047	regulation of cell-cell adhesion mediated by cadherin	2/724	21/18866	0.191843	0.580425	0.532777	PLG/VEGFA	2
GO:2000678	GO:2000678	negative regulation of transcription regulatory region DNA binding	2/724	21/18866	0.191843	0.580425	0.532777	GATA1/PER2	2
GO:0044264	GO:0044264	cellular polysaccharide metabolic process	6/724	101/18866	0.191947	0.580425	0.532777	B4GALT5/GBE1/IGF1/PER2/PYGM/ENPP1	6
GO:0060191	GO:0060191	regulation of lipase activity	6/724	101/18866	0.191947	0.580425	0.532777	ESR1/FGFR1/FGFR2/KIT/PLAA/BDNF	6
GO:1990542	GO:1990542	mitochondrial transmembrane transport	6/724	101/18866	0.191947	0.580425	0.532777	GRPEL2/PNPT1/SFXN1/SLC25A20/SLC25A22/TIMM23	6
GO:0051650	GO:0051650	establishment of vesicle localization	11/724	212/18866	0.192915	0.582867	0.535019	CDK5/F5/LIN7A/LMAN1/MAP2/RAB27A/RAB27B/TRAK2/CNIH3/MAPK15/MREG	11
GO:0003151	GO:0003151	outflow tract morphogenesis	5/724	80/18866	0.193109	0.582867	0.535019	CITED2/CRKL/FGFR2/TGFBR3/VEGFA	5
GO:1901224	GO:1901224	positive regulation of NIK/NF-kappaB signaling	5/724	80/18866	0.193109	0.582867	0.535019	EDN1/NOD2/TRADD/C1QTNF4/CARD10	5
GO:0000302	GO:0000302	response to reactive oxygen species	12/724	235/18866	0.193714	0.58398	0.53604	BAD/BAK1/CRYAB/EDN1/FOXO3/HP/MYB/PLEKHA1/PTK2B/PYCR1/TNFAIP3/TRPC6	12
GO:0071453	GO:0071453	cellular response to oxygen levels	12/724	235/18866	0.193714	0.58398	0.53604	ADAM8/BAD/CAV1/CITED2/EDN1/FOXO3/KCNMB1/MPL/PTN/TRPC6/CD34/VEGFA	12
GO:0003007	GO:0003007	heart morphogenesis	13/724	258/18866	0.193922	0.58425	0.536288	CITED2/CRKL/FGFR2/PKP2/PPP1R13L/SNAI1/TBX19/TBX6/TGFB1/TGFBR3/TNNC1/FAT4/VEGFA	13
GO:0002761	GO:0002761	regulation of myeloid leukocyte differentiation	7/724	123/18866	0.194087	0.584391	0.536417	GATA2/INHBA/KLF10/LRRC17/LTF/MITF/TGFB1	7
GO:0001990	GO:0001990	regulation of systemic arterial blood pressure by hormone	3/724	40/18866	0.197487	0.589634	0.54123	CTSG/EDN1/ENPEP	3
GO:0009187	GO:0009187	cyclic nucleotide metabolic process	3/724	40/18866	0.197487	0.589634	0.54123	EPHA2/GUCY1A2/NPPB	3
GO:0032467	GO:0032467	positive regulation of cytokinesis	3/724	40/18866	0.197487	0.589634	0.54123	KIF14/MAP10/AURKC	3
GO:0043902	GO:0043902	positive regulation of multi-organism process	3/724	40/18866	0.197487	0.589634	0.54123	INHBA/VEGFA/CCDC87	3
GO:0045740	GO:0045740	positive regulation of DNA replication	3/724	40/18866	0.197487	0.589634	0.54123	E2F7/FGFR1/EGF	3
GO:0045746	GO:0045746	negative regulation of Notch signaling pathway	3/724	40/18866	0.197487	0.589634	0.54123	CHAC1/GATA2/EGF	3
GO:0048713	GO:0048713	regulation of oligodendrocyte differentiation	3/724	40/18866	0.197487	0.589634	0.54123	DAAM2/PTN/TENM4	3
GO:0140353	GO:0140353	lipid export from cell	3/724	40/18866	0.197487	0.589634	0.54123	EDN1/INHBA/MYB	3
GO:1902742	GO:1902742	apoptotic process involved in development	3/724	40/18866	0.197487	0.589634	0.54123	BAK1/CRYAB/HNF1B	3
GO:1902895	GO:1902895	positive regulation of pri-miRNA transcription by RNA polymerase II	3/724	40/18866	0.197487	0.589634	0.54123	FOXO3/GATA2/TGFB1	3
GO:1903427	GO:1903427	negative regulation of reactive oxygen species biosynthetic process	3/724	40/18866	0.197487	0.589634	0.54123	CAV1/CD34/SLC18A2	3
GO:0002819	GO:0002819	regulation of adaptive immune response	9/724	168/18866	0.197735	0.589634	0.54123	CD1E/CD226/CLC/HFE/IL1RL1/PRKCQ/TGFB1/TNFAIP3/CD160	9
GO:0060996	GO:0060996	dendritic spine development	6/724	102/18866	0.197863	0.589634	0.54123	CDK5/DLG4/DLG5/PPP1R9A/SIPA1L1/SHANK3	6
GO:0030865	GO:0030865	cortical cytoskeleton organization	4/724	60/18866	0.198097	0.589634	0.54123	CDK5/NCKAP1/RAB13/RHOH	4
GO:0032653	GO:0032653	regulation of interleukin-10 production	4/724	60/18866	0.198097	0.589634	0.54123	EPX/NOD2/PDCD1LG2/CD34	4
GO:0043388	GO:0043388	positive regulation of DNA binding	4/724	60/18866	0.198097	0.589634	0.54123	EDF1/IGF1/TGFB1/EGF	4
GO:0044784	GO:0044784	metaphase/anaphase transition of cell cycle	4/724	60/18866	0.198097	0.589634	0.54123	CDC16/NDC80/TRIP13/MAPK15	4
GO:0048747	GO:0048747	muscle fiber development	4/724	60/18866	0.198097	0.589634	0.54123	NRAP/UCHL1/ACTA1/VEGFA	4
GO:0097755	GO:0097755	positive regulation of blood vessel diameter	4/724	60/18866	0.198097	0.589634	0.54123	KCNMB1/PRKG1/PTPRM/ADORA1	4
GO:0044344	GO:0044344	cellular response to fibroblast growth factor stimulus	8/724	146/18866	0.199165	0.592455	0.543819	CRKL/CXCL8/EGR3/FGFR1/FGFR2/RUNX2/TDGF1/FAT4	8
GO:0061982	GO:0061982	meiosis I cell cycle process	7/724	124/18866	0.199443	0.592926	0.544252	CKS2/HORMAD1/MEIKIN/TRIP13/CCNA1/MAPK15/TEX19	7
GO:0071158	GO:0071158	positive regulation of cell cycle arrest	5/724	81/18866	0.199841	0.593751	0.545009	CDKN1A/E2F7/GADD45A/GTSE1/PPP2R5B	5
GO:0015849	GO:0015849	organic acid transport	17/724	353/18866	0.200385	0.595008	0.546163	AQP9/EDN1/PER2/SFXN1/SLC10A7/SLC16A2/SLC25A20/SLC25A22/SLC2A1/SLC6A9/SPX/SYT1/UNC13B/ADORA1/BDNF/OCA2/SLC1A1	17
GO:0009150	GO:0009150	purine ribonucleotide metabolic process	19/724	401/18866	0.20292	0.600366	0.551081	ACOT7/ACOT8/ACSM1/ACSM3/BAD/DBI/DDIT4/ELOVL7/EPHA2/GMPS/HACD1/IGF1/POM121/SLC2A6/TGFB1/GUCY1A2/NPPB/ELOVL6/ENPP1	19
GO:0042472	GO:0042472	inner ear morphogenesis	6/724	103/18866	0.203847	0.600366	0.551081	FGFR1/FGFR2/GATA2/TFAP2A/TPRN/ZEB1	6
GO:0051384	GO:0051384	response to glucocorticoid	8/724	147/18866	0.204124	0.600366	0.551081	BAD/CDKN1A/DDIT4/EDN1/FOSB/FOXO3/SMYD3/FBXO32	8
GO:0007368	GO:0007368	determination of left/right symmetry	7/724	125/18866	0.204857	0.600366	0.551081	CITED2/DAAM2/DISP1/DPCD/DYNC2H1/TBX6/TDGF1	7
GO:0035270	GO:0035270	endocrine system development	7/724	125/18866	0.204857	0.600366	0.551081	BAD/BAK1/CITED2/CRKL/GATA2/TBX19/PBX1	7
GO:0060562	GO:0060562	epithelial tube morphogenesis	16/724	331/18866	0.205111	0.600366	0.551081	ARHGAP35/DLG5/EDN1/EPHA2/ESR1/FGFR2/KIF26B/LMO4/TBX6/TGFB1/FAT4/GLI3/HNF1B/PBX1/VEGFA/EGF	16
GO:0002313	GO:0002313	mature B cell differentiation involved in immune response	2/724	22/18866	0.205988	0.600366	0.551081	ITM2A/PTK2B	2
GO:0006925	GO:0006925	inflammatory cell apoptotic process	2/724	22/18866	0.205988	0.600366	0.551081	HCAR2/NOD2	2
GO:0009190	GO:0009190	cyclic nucleotide biosynthetic process	2/724	22/18866	0.205988	0.600366	0.551081	GUCY1A2/NPPB	2
GO:0009235	GO:0009235	cobalamin metabolic process	2/724	22/18866	0.205988	0.600366	0.551081	LMBRD1/TCN1	2
GO:0010560	GO:0010560	positive regulation of glycoprotein biosynthetic process	2/724	22/18866	0.205988	0.600366	0.551081	IGF1/RAMP1	2
GO:0021513	GO:0021513	spinal cord dorsal/ventral patterning	2/724	22/18866	0.205988	0.600366	0.551081	CHRD/GLI3	2
GO:0021516	GO:0021516	dorsal spinal cord development	2/724	22/18866	0.205988	0.600366	0.551081	DAAM2/LMO4	2
GO:0033005	GO:0033005	positive regulation of mast cell activation	2/724	22/18866	0.205988	0.600366	0.551081	CD226/GATA2	2
GO:0034104	GO:0034104	negative regulation of tissue remodeling	2/724	22/18866	0.205988	0.600366	0.551081	TMEM119/TNFAIP3	2
GO:0034312	GO:0034312	diol biosynthetic process	2/724	22/18866	0.205988	0.600366	0.551081	SPTLC1/ACER2	2
GO:0035584	GO:0035584	calcium-mediated signaling using intracellular calcium source	2/724	22/18866	0.205988	0.600366	0.551081	DMTN/SELP	2
GO:0042454	GO:0042454	ribonucleoside catabolic process	2/724	22/18866	0.205988	0.600366	0.551081	ADAL/CDA	2
GO:0045980	GO:0045980	negative regulation of nucleotide metabolic process	2/724	22/18866	0.205988	0.600366	0.551081	CDA/DDIT4	2
GO:0051000	GO:0051000	positive regulation of nitric-oxide synthase activity	2/724	22/18866	0.205988	0.600366	0.551081	PTK2B/NOS1AP	2
GO:0051131	GO:0051131	chaperone-mediated protein complex assembly	2/724	22/18866	0.205988	0.600366	0.551081	LONP1/NDUFAF1	2
GO:0051291	GO:0051291	protein heterooligomerization	2/724	22/18866	0.205988	0.600366	0.551081	SYT1/KRT1	2
GO:0051383	GO:0051383	kinetochore organization	2/724	22/18866	0.205988	0.600366	0.551081	CENPK/NDC80	2
GO:0052652	GO:0052652	cyclic purine nucleotide metabolic process	2/724	22/18866	0.205988	0.600366	0.551081	GUCY1A2/NPPB	2
GO:0055093	GO:0055093	response to hyperoxia	2/724	22/18866	0.205988	0.600366	0.551081	CAV1/CDKN1A	2
GO:0072576	GO:0072576	liver morphogenesis	2/724	22/18866	0.205988	0.600366	0.551081	PTN/TNFAIP3	2
GO:0090189	GO:0090189	regulation of branching involved in ureteric bud morphogenesis	2/724	22/18866	0.205988	0.600366	0.551081	HNF1B/VEGFA	2
GO:0140112	GO:0140112	extracellular vesicle biogenesis	2/724	22/18866	0.205988	0.600366	0.551081	RAB27A/CD34	2
GO:0003170	GO:0003170	heart valve development	4/724	61/18866	0.206079	0.600366	0.551081	NFATC1/SNAI1/TGFB1/EMILIN1	4
GO:0042267	GO:0042267	natural killer cell mediated cytotoxicity	4/724	61/18866	0.206079	0.600366	0.551081	CD226/PIK3R6/RAB27A/CD160	4
GO:0046847	GO:0046847	filopodium assembly	4/724	61/18866	0.206079	0.600366	0.551081	DMTN/PPP1R9A/TENM2/TENM1	4
GO:1902110	GO:1902110	positive regulation of mitochondrial membrane permeability involved in apoptotic process	4/724	61/18866	0.206079	0.600366	0.551081	BAD/BAK1/MOAP1/PPP3CC	4
GO:0033574	GO:0033574	response to testosterone	3/724	41/18866	0.207458	0.60119	0.551837	BAD/EDN1/MTAP	3
GO:0035136	GO:0035136	forelimb morphogenesis	3/724	41/18866	0.207458	0.60119	0.551837	HOXA9/RUNX2/TFAP2A	3
GO:0042269	GO:0042269	regulation of natural killer cell mediated cytotoxicity	3/724	41/18866	0.207458	0.60119	0.551837	CD226/PIK3R6/CD160	3
GO:0070317	GO:0070317	negative regulation of G0 to G1 transition	3/724	41/18866	0.207458	0.60119	0.551837	MGA/PPP2R5B/RBBP7	3
GO:0071985	GO:0071985	multivesicular body sorting pathway	3/724	41/18866	0.207458	0.60119	0.551837	RAB27A/RAB27B/SYTL4	3
GO:0099622	GO:0099622	cardiac muscle cell membrane repolarization	3/724	41/18866	0.207458	0.60119	0.551837	AKAP9/KCNH2/NOS1AP	3
GO:1902042	GO:1902042	negative regulation of extrinsic apoptotic signaling pathway via death domain receptors	3/724	41/18866	0.207458	0.60119	0.551837	TNFAIP3/TRADD/SCRT2	3
GO:1905209	GO:1905209	positive regulation of cardiocyte differentiation	3/724	41/18866	0.207458	0.60119	0.551837	EDN1/IGF1/TGFB1	3
GO:2000008	GO:2000008	regulation of protein localization to cell surface	3/724	41/18866	0.207458	0.60119	0.551837	HFE/BDNF/EGF	3
GO:0030041	GO:0030041	actin filament polymerization	10/724	193/18866	0.208506	0.603807	0.554239	DMTN/ESAM/HCK/NCKAP1/PPP1R9A/PTK2B/RASA1/TMOD2/WHAMM/TENM1	10
GO:0061448	GO:0061448	connective tissue development	13/724	262/18866	0.208606	0.603807	0.554239	BMP1/EDN1/FGFR1/FTO/GPLD1/NFIB/RUNX2/SNAI1/TGFB1/ZEB1/BMPR1B/CD34/GLI3	13
GO:0045765	GO:0045765	regulation of angiogenesis	19/724	403/18866	0.208869	0.604215	0.554614	CXCL8/EPHA2/GADD45A/GATA2/MIR101-1/PIK3R6/PTK2B/PTN/PTPRM/STAB1/TNFAIP3/TNFRSF12A/CARD10/CD160/CD34/EMILIN1/KRT1/NPPB/VEGFA	19
GO:0071901	GO:0071901	negative regulation of protein serine/threonine kinase activity	8/724	148/18866	0.209133	0.604625	0.55499	CAV1/CDKN1A/CDKN2B/GADD45A/MBIP/TNFAIP3/UCHL1/PKIA	8
GO:0019693	GO:0019693	ribose phosphate metabolic process	20/724	427/18866	0.209564	0.605517	0.555809	ACOT7/ACOT8/ACSM1/ACSM3/BAD/CTPS1/DBI/DDIT4/ELOVL7/EPHA2/GMPS/HACD1/IGF1/POM121/SLC2A6/TGFB1/GUCY1A2/NPPB/ELOVL6/ENPP1	20
GO:0007200	GO:0007200	phospholipase C-activating G protein-coupled receptor signaling pathway	6/724	104/18866	0.209894	0.605762	0.556034	EDN1/ESR1/GPR174/OPRL1/P2RY2/FFAR4	6
GO:0120034	GO:0120034	positive regulation of plasma membrane bounded cell projection assembly	6/724	104/18866	0.209894	0.605762	0.556034	ARHGAP35/KIT/NCKAP1/TENM2/EPS8L3/TENM1	6
GO:0051170	GO:0051170	import into nucleus	9/724	171/18866	0.211627	0.610405	0.560296	ANGPT1/CDKN1A/DDX20/IPO13/KPNB1/POM121/TGFB1/GLI3/PKIA	9
GO:0046578	GO:0046578	regulation of Ras protein signal transduction	10/724	194/18866	0.212896	0.613463	0.563103	ADGRG1/ARHGAP35/ARHGEF3/CRKL/GPR174/IGF1/KIF14/NTRK1/RASA1/EPS8L3	10
GO:0050803	GO:0050803	regulation of synapse structure or activity	12/724	240/18866	0.21306	0.613463	0.563103	CDK5/CRKL/DLG5/NRCAM/NTRK1/PPP1R9A/PTN/SEMA4D/SIPA1L1/ADGRL3/BDNF/SHANK3	12
GO:0070663	GO:0070663	regulation of leukocyte proliferation	12/724	240/18866	0.21306	0.613463	0.563103	CDKN1A/CLC/DLG5/IGF1/IL5RA/MPL/PDCD1LG2/PRKCQ/TICAM1/TNFAIP3/TNFSF9/VTCN1	12
GO:0048145	GO:0048145	regulation of fibroblast proliferation	5/724	83/18866	0.213538	0.613749	0.563365	CDKN1A/ESR1/IGF1/MYB/PDGFC	5
GO:0048644	GO:0048644	muscle organ morphogenesis	5/724	83/18866	0.213538	0.613749	0.563365	FGFR2/PKP2/TGFB1/TGFBR3/TNNC1	5
GO:2000243	GO:2000243	positive regulation of reproductive process	5/724	83/18866	0.213538	0.613749	0.563365	CITED2/INHBA/MAPK15/VEGFA/CCDC87	5
GO:0034113	GO:0034113	heterotypic cell-cell adhesion	4/724	62/18866	0.214153	0.613749	0.563365	GLDN/ITGB7/NRCAM/PKP2	4
GO:0055081	GO:0055081	anion homeostasis	4/724	62/18866	0.214153	0.613749	0.563365	SLC12A1/ADORA1/CA12/ENPP1	4
GO:0060393	GO:0060393	regulation of pathway-restricted SMAD protein phosphorylation	4/724	62/18866	0.214153	0.613749	0.563365	HFE/INHBA/TGFB1/EMILIN1	4
GO:1902475	GO:1902475	L-alpha-amino acid transmembrane transport	4/724	62/18866	0.214153	0.613749	0.563365	PER2/SLC25A22/SLC6A9/SLC1A1	4
GO:1904589	GO:1904589	regulation of protein import	4/724	62/18866	0.214153	0.613749	0.563365	ANGPT1/TGFB1/GLI3/PKIA	4
GO:1905477	GO:1905477	positive regulation of protein localization to membrane	7/724	127/18866	0.215848	0.617237	0.566567	BAD/CDK5/EPHA2/PPP3CC/PRKCH/PTN/ANK3	7
GO:0044070	GO:0044070	regulation of anion transport	6/724	105/18866	0.216005	0.617237	0.566567	ABCB1/DBI/EDN1/FGFR1/PER2/ADORA1	6
GO:0007623	GO:0007623	circadian rhythm	11/724	218/18866	0.217476	0.617237	0.566567	EGR3/KLF10/NTRK1/OPRL1/PER1/PER2/TPH1/ADORA1/BDNF/GPR176/HNF1B	11
GO:0036294	GO:0036294	cellular response to decreased oxygen levels	11/724	218/18866	0.217476	0.617237	0.566567	ADAM8/BAD/CITED2/EDN1/FOXO3/KCNMB1/MPL/PTN/TRPC6/CD34/VEGFA	11
GO:0021795	GO:0021795	cerebral cortex cell migration	3/724	42/18866	0.217538	0.617237	0.566567	ADGRG1/CDK5/GLI3	3
GO:0050912	GO:0050912	detection of chemical stimulus involved in sensory perception of taste	3/724	42/18866	0.217538	0.617237	0.566567	LPO/TAS1R3/FFAR4	3
GO:0071470	GO:0071470	cellular response to osmotic stress	3/724	42/18866	0.217538	0.617237	0.566567	BAD/MBIP/SLC2A1	3
GO:0090278	GO:0090278	negative regulation of peptide hormone secretion	3/724	42/18866	0.217538	0.617237	0.566567	MIDN/FFAR4/SYTL4	3
GO:0009896	GO:0009896	positive regulation of catabolic process	21/724	454/18866	0.218642	0.617237	0.566567	ADAM8/AGBL4/BAD/CAV1/DTL/FOXO3/FTO/GPLD1/IGF1/MEFV/PCSK9/PNPT1/PTK2B/RNF14/SPTLC1/SUPV3L1/TICAM1/TNFAIP3/ADORA1/RUFY4/EGF	21
GO:0006606	GO:0006606	protein import into nucleus	8/724	150/18866	0.219292	0.617237	0.566567	ANGPT1/CDKN1A/IPO13/KPNB1/POM121/TGFB1/GLI3/PKIA	8
GO:0090263	GO:0090263	positive regulation of canonical Wnt signaling pathway	8/724	150/18866	0.219292	0.617237	0.566567	BAMBI/CAV1/DAAM2/FGFR2/SCEL/TGFB1/WNK2/EGF	8
GO:0097530	GO:0097530	granulocyte migration	8/724	150/18866	0.219292	0.617237	0.566567	ADAM8/CXCL8/DAPK2/DPP4/EDN1/EPX/RHOH/S100A12	8
GO:1905039	GO:1905039	carboxylic acid transmembrane transport	8/724	150/18866	0.219292	0.617237	0.566567	AQP9/PER2/SLC16A2/SLC25A20/SLC25A22/SLC2A1/SLC6A9/SLC1A1	8
GO:0002052	GO:0002052	positive regulation of neuroblast proliferation	2/724	23/18866	0.220239	0.617237	0.566567	GLI3/VEGFA	2
GO:0006359	GO:0006359	regulation of transcription by RNA polymerase III	2/724	23/18866	0.220239	0.617237	0.566567	POLR3G/TENM1	2
GO:0007413	GO:0007413	axonal fasciculation	2/724	23/18866	0.220239	0.617237	0.566567	ARHGAP35/NRCAM	2
GO:0022010	GO:0022010	central nervous system myelination	2/724	23/18866	0.220239	0.617237	0.566567	B4GALT5/TENM4	2
GO:0032291	GO:0032291	axon ensheathment in central nervous system	2/724	23/18866	0.220239	0.617237	0.566567	B4GALT5/TENM4	2
GO:0032693	GO:0032693	negative regulation of interleukin-10 production	2/724	23/18866	0.220239	0.617237	0.566567	EPX/PDCD1LG2	2
GO:0043576	GO:0043576	regulation of respiratory gaseous exchange	2/724	23/18866	0.220239	0.617237	0.566567	FTO/ADORA1	2
GO:0048714	GO:0048714	positive regulation of oligodendrocyte differentiation	2/724	23/18866	0.220239	0.617237	0.566567	PTN/TENM4	2
GO:0051570	GO:0051570	regulation of histone H3-K9 methylation	2/724	23/18866	0.220239	0.617237	0.566567	KDM4D/MYB	2
GO:0060149	GO:0060149	negative regulation of posttranscriptional gene silencing	2/724	23/18866	0.220239	0.617237	0.566567	ESR1/TGFB1	2
GO:0060445	GO:0060445	branching involved in salivary gland morphogenesis	2/724	23/18866	0.220239	0.617237	0.566567	FGFR1/FGFR2	2
GO:0060547	GO:0060547	negative regulation of necrotic cell death	2/724	23/18866	0.220239	0.617237	0.566567	CAV1/MIR101-1	2
GO:0060967	GO:0060967	negative regulation of gene silencing by RNA	2/724	23/18866	0.220239	0.617237	0.566567	ESR1/TGFB1	2
GO:0070584	GO:0070584	mitochondrion morphogenesis	2/724	23/18866	0.220239	0.617237	0.566567	PNPT1/SUPV3L1	2
GO:0071305	GO:0071305	cellular response to vitamin D	2/724	23/18866	0.220239	0.617237	0.566567	GDAP1/PTN	2
GO:0072215	GO:0072215	regulation of metanephros development	2/724	23/18866	0.220239	0.617237	0.566567	FAT4/HNF1B	2
GO:0106030	GO:0106030	neuron projection fasciculation	2/724	23/18866	0.220239	0.617237	0.566567	ARHGAP35/NRCAM	2
GO:1900017	GO:1900017	positive regulation of cytokine production involved in inflammatory response	2/724	23/18866	0.220239	0.617237	0.566567	NOD2/TICAM1	2
GO:1900273	GO:1900273	positive regulation of long-term synaptic potentiation	2/724	23/18866	0.220239	0.617237	0.566567	NRGN/SHANK3	2
GO:1901522	GO:1901522	positive regulation of transcription from RNA polymerase II promoter involved in cellular response to chemical stimulus	2/724	23/18866	0.220239	0.617237	0.566567	RUNX2/VEGFA	2
GO:1902001	GO:1902001	fatty acid transmembrane transport	2/724	23/18866	0.220239	0.617237	0.566567	SLC25A20/SLC2A1	2
GO:1902259	GO:1902259	regulation of delayed rectifier potassium channel activity	2/724	23/18866	0.220239	0.617237	0.566567	ANK3/NOS1AP	2
GO:1903077	GO:1903077	negative regulation of protein localization to plasma membrane	2/724	23/18866	0.220239	0.617237	0.566567	TGFB1/LYPD1	2
GO:1903798	GO:1903798	regulation of production of miRNAs involved in gene silencing by miRNA	2/724	23/18866	0.220239	0.617237	0.566567	ESR1/TGFB1	2
GO:1904996	GO:1904996	positive regulation of leukocyte adhesion to vascular endothelial cell	2/724	23/18866	0.220239	0.617237	0.566567	SELP/ELANE	2
GO:0015844	GO:0015844	monoamine transport	5/724	84/18866	0.220495	0.617237	0.566567	SYT1/SYT15/MAPK15/SLC18A2/SLC22A1	5
GO:0048144	GO:0048144	fibroblast proliferation	5/724	84/18866	0.220495	0.617237	0.566567	CDKN1A/ESR1/IGF1/MYB/PDGFC	5
GO:0097061	GO:0097061	dendritic spine organization	5/724	84/18866	0.220495	0.617237	0.566567	CDK5/DLG4/PPP1R9A/SIPA1L1/SHANK3	5
GO:0006633	GO:0006633	fatty acid biosynthetic process	9/724	173/18866	0.221099	0.618577	0.567797	ACOT7/ACSM1/ACSM3/EDN1/ELOVL7/HACD1/PTGS1/HPGD/ELOVL6	9
GO:0009952	GO:0009952	anterior/posterior pattern specification	11/724	219/18866	0.221691	0.619515	0.568658	CRB2/CRKL/HES6/HOXA9/TBX19/TBX6/TDGF1/WDR77/GLI3/HNF1B/PBX1	11
GO:0060759	GO:0060759	regulation of response to cytokine stimulus	10/724	196/18866	0.221789	0.619515	0.568658	ANGPT1/CAV1/EDN1/PADI2/SOCS3/TNFAIP3/TRADD/TRAIP/C1QTNF4/STAP1	10
GO:0031122	GO:0031122	cytoplasmic microtubule organization	4/724	63/18866	0.222313	0.619515	0.568658	CLIP4/KPNB1/MAP10/SLAIN2	4
GO:0031571	GO:0031571	mitotic G1 DNA damage checkpoint	4/724	63/18866	0.222313	0.619515	0.568658	CDKN1A/E2F7/GADD45A/GTSE1	4
GO:0032613	GO:0032613	interleukin-10 production	4/724	63/18866	0.222313	0.619515	0.568658	EPX/NOD2/PDCD1LG2/CD34	4
GO:0046635	GO:0046635	positive regulation of alpha-beta T cell activation	4/724	63/18866	0.222313	0.619515	0.568658	MYB/PRKCQ/CD160/GLI3	4
GO:1902686	GO:1902686	mitochondrial outer membrane permeabilization involved in programmed cell death	4/724	63/18866	0.222313	0.619515	0.568658	BAD/BAK1/MOAP1/PPP3CC	4
GO:0070661	GO:0070661	leukocyte proliferation	15/724	313/18866	0.223907	0.623606	0.572414	CD19/CDKN1A/CLC/CTPS1/DLG5/IGF1/IL5RA/KIT/MPL/PDCD1LG2/PRKCQ/TICAM1/TNFAIP3/TNFSF9/VTCN1	15
GO:0051224	GO:0051224	negative regulation of protein transport	8/724	151/18866	0.224439	0.624384	0.573127	ANGPT1/CDK5/DMTN/LMAN1/MIDN/FFAR4/PKIA/SYTL4	8
GO:1903825	GO:1903825	organic acid transmembrane transport	8/724	151/18866	0.224439	0.624384	0.573127	AQP9/PER2/SLC16A2/SLC25A20/SLC25A22/SLC2A1/SLC6A9/SLC1A1	8
GO:0060485	GO:0060485	mesenchyme development	14/724	290/18866	0.225866	0.626445	0.575019	BAMBI/CITED2/CRB2/DLG5/EDN1/FAM83D/FGFR1/FGFR2/SEMA4D/SEMA6B/SNAI1/TGFB1/TGFBR3/ACTA1	14
GO:0003205	GO:0003205	cardiac chamber development	9/724	174/18866	0.225896	0.626445	0.575019	CITED2/FGFR2/LMO4/PKP2/PPP1R13L/TBX6/TGFB1/TGFBR3/TNNC1	9
GO:0007163	GO:0007163	establishment or maintenance of cell polarity	11/724	220/18866	0.225938	0.626445	0.575019	ARHGAP35/CRB2/CRKL/DLG5/KIF26B/LIN7A/MAP2/NDC80/PTK2B/RHOH/WEE1	11
GO:0009749	GO:0009749	response to glucose	10/724	197/18866	0.22629	0.626445	0.575019	BAD/COL6A2/EIF2B5/ERN1/FOXO3/GJB6/GPLD1/PTK2B/UNC13B/HNF1B	10
GO:0060537	GO:0060537	muscle tissue development	19/724	409/18866	0.227194	0.626445	0.575019	CAV1/CDK5/EDN1/FGFR1/FGFR2/HIVEP3/IGF1/MAPK11/MSC/MYL6B/NRAP/PKP2/PPP1R13L/TGFB1/TGFBR3/TNNC1/ACTA1/VEGFA/TENM4	19
GO:0050808	GO:0050808	synapse organization	20/724	433/18866	0.227384	0.626445	0.575019	ACHE/CDK5/CRKL/DLG4/DLG5/NRCAM/NTRK1/PCDH17/PPP1R9A/PTN/SEMA4D/SIPA1L1/SLC8A2/UNC13B/ADGRL3/ANK3/BDNF/CNKSR2/NOS1AP/SHANK3	20
GO:0031110	GO:0031110	regulation of microtubule polymerization or depolymerization	5/724	85/18866	0.227521	0.626445	0.575019	AKAP9/EML2/MAP2/SLAIN2/NAV3	5
GO:0072384	GO:0072384	organelle transport along microtubule	5/724	85/18866	0.227521	0.626445	0.575019	AGBL4/MAP2/TRAK2/UCHL1/MREG	5
GO:0000413	GO:0000413	protein peptidyl-prolyl isomerization	3/724	43/18866	0.227718	0.626445	0.575019	FKBP14/FKBP2/PPIG	3
GO:0001953	GO:0001953	negative regulation of cell-matrix adhesion	3/724	43/18866	0.227718	0.626445	0.575019	DMTN/RASA1/ACER2	3
GO:0006308	GO:0006308	DNA catabolic process	3/724	43/18866	0.227718	0.626445	0.575019	DNASE1/KPNB1/SETMAR	3
GO:0010470	GO:0010470	regulation of gastrulation	3/724	43/18866	0.227718	0.626445	0.575019	CRB2/FGFR1/TENM4	3
GO:0015804	GO:0015804	neutral amino acid transport	3/724	43/18866	0.227718	0.626445	0.575019	SFXN1/SLC6A9/SLC1A1	3
GO:0016339	GO:0016339	calcium-dependent cell-cell adhesion via plasma membrane cell adhesion molecules	3/724	43/18866	0.227718	0.626445	0.575019	ARVCF/CDH23/SELP	3
GO:0017158	GO:0017158	regulation of calcium ion-dependent exocytosis	3/724	43/18866	0.227718	0.626445	0.575019	CDK5/SYT1/SYT15	3
GO:0040019	GO:0040019	positive regulation of embryonic development	3/724	43/18866	0.227718	0.626445	0.575019	B4GALT5/IGF1/TENM4	3
GO:0045124	GO:0045124	regulation of bone resorption	3/724	43/18866	0.227718	0.626445	0.575019	ADAM8/TMEM119/TNFAIP3	3
GO:0045773	GO:0045773	positive regulation of axon extension	3/724	43/18866	0.227718	0.626445	0.575019	TNFRSF12A/TRPC5/VEGFA	3
GO:0051154	GO:0051154	negative regulation of striated muscle cell differentiation	3/724	43/18866	0.227718	0.626445	0.575019	TMEM119/TRIM72/BDNF	3
GO:0150077	GO:0150077	regulation of neuroinflammatory response	3/724	43/18866	0.227718	0.626445	0.575019	CD200R1L/IGF1/STAP1	3
GO:0030148	GO:0030148	sphingolipid biosynthetic process	6/724	107/18866	0.228403	0.627631	0.576107	B4GALT5/ELOVL7/HACD1/SPTLC1/ACER2/ELOVL6	6
GO:0051963	GO:0051963	regulation of synapse assembly	6/724	107/18866	0.228403	0.627631	0.576107	DLG5/NTRK1/PPP1R9A/SEMA4D/ADGRL3/BDNF	6
GO:0002224	GO:0002224	toll-like receptor signaling pathway	8/724	152/18866	0.22963	0.629684	0.577992	CAV1/ESR1/LTF/MFHAS1/TANK/TICAM1/TNFAIP3/TRIL	8
GO:0002064	GO:0002064	epithelial cell development	11/724	221/18866	0.230218	0.629684	0.577992	BAD/CDKN1A/EPHA2/ESR1/FGFR1/MARVELD2/NTRK1/RAB13/S1PR3/TPRN/VEGFA	11
GO:0042445	GO:0042445	hormone metabolic process	11/724	221/18866	0.230218	0.629684	0.577992	CTSG/DGKQ/DISP1/ENPEP/ESR1/GCNT4/HFE/HSD17B6/PLEKHA1/SLC16A2/PCSK1	11
GO:0002066	GO:0002066	columnar/cuboidal epithelial cell development	4/724	64/18866	0.230553	0.629684	0.577992	BAD/CDKN1A/FGFR1/TPRN	4
GO:0030166	GO:0030166	proteoglycan biosynthetic process	4/724	64/18866	0.230553	0.629684	0.577992	IGF1/XYLT2/BMPR1B/DSEL	4
GO:0032835	GO:0032835	glomerulus development	4/724	64/18866	0.230553	0.629684	0.577992	ANGPT1/ENPEP/CD34/COL4A4	4
GO:0044783	GO:0044783	G1 DNA damage checkpoint	4/724	64/18866	0.230553	0.629684	0.577992	CDKN1A/E2F7/GADD45A/GTSE1	4
GO:0044819	GO:0044819	mitotic G1/S transition checkpoint	4/724	64/18866	0.230553	0.629684	0.577992	CDKN1A/E2F7/GADD45A/GTSE1	4
GO:0045453	GO:0045453	bone resorption	4/724	64/18866	0.230553	0.629684	0.577992	ADAM8/PTK2B/TMEM119/TNFAIP3	4
GO:0046173	GO:0046173	polyol biosynthetic process	4/724	64/18866	0.230553	0.629684	0.577992	PTK2B/SPTLC1/ACER2/CYP27A1	4
GO:0046686	GO:0046686	response to cadmium ion	4/724	64/18866	0.230553	0.629684	0.577992	KIT/MTF1/SORD/MT1F	4
GO:0015850	GO:0015850	organic hydroxy compound transport	13/724	268/18866	0.231508	0.631677	0.579822	AQP11/AQP9/CAV1/MYB/OSBPL6/PCSK9/SLC10A7/SYT1/SYT15/MAPK15/SLC18A2/SLC22A1/EGF	13
GO:0002719	GO:0002719	negative regulation of cytokine production involved in immune response	2/724	24/18866	0.234567	0.631677	0.579822	HFE/TGFB1	2
GO:0003094	GO:0003094	glomerular filtration	2/724	24/18866	0.234567	0.631677	0.579822	ADORA1/CD34	2
GO:0007141	GO:0007141	male meiosis I	2/724	24/18866	0.234567	0.631677	0.579822	TRIP13/CCNA1	2
GO:0021511	GO:0021511	spinal cord patterning	2/724	24/18866	0.234567	0.631677	0.579822	CHRD/GLI3	2
GO:0021871	GO:0021871	forebrain regionalization	2/724	24/18866	0.234567	0.631677	0.579822	ADGRG1/GLI3	2
GO:0030325	GO:0030325	adrenal gland development	2/724	24/18866	0.234567	0.631677	0.579822	CITED2/PBX1	2
GO:0032469	GO:0032469	endoplasmic reticulum calcium ion homeostasis	2/724	24/18866	0.234567	0.631677	0.579822	BAK1/ATP2A1	2
GO:0032753	GO:0032753	positive regulation of interleukin-4 production	2/724	24/18866	0.234567	0.631677	0.579822	EPX/PRKCQ	2
GO:0033622	GO:0033622	integrin activation	2/724	24/18866	0.234567	0.631677	0.579822	KIF14/SELP	2
GO:0034695	GO:0034695	response to prostaglandin E	2/724	24/18866	0.234567	0.631677	0.579822	TGFBR3/PTGER2	2
GO:0042430	GO:0042430	indole-containing compound metabolic process	2/724	24/18866	0.234567	0.631677	0.579822	AFMID/TPH1	2
GO:0045954	GO:0045954	positive regulation of natural killer cell mediated cytotoxicity	2/724	24/18866	0.234567	0.631677	0.579822	CD226/CD160	2
GO:0060444	GO:0060444	branching involved in mammary gland duct morphogenesis	2/724	24/18866	0.234567	0.631677	0.579822	EPHA2/ESR1	2
GO:0070193	GO:0070193	synaptonemal complex organization	2/724	24/18866	0.234567	0.631677	0.579822	HORMAD1/TRIP13	2
GO:0071294	GO:0071294	cellular response to zinc ion	2/724	24/18866	0.234567	0.631677	0.579822	MTF1/MT1F	2
GO:0086064	GO:0086064	cell communication by electrical coupling involved in cardiac conduction	2/724	24/18866	0.234567	0.631677	0.579822	CAV1/PKP2	2
GO:0090335	GO:0090335	regulation of brown fat cell differentiation	2/724	24/18866	0.234567	0.631677	0.579822	FTO/FFAR4	2
GO:0098581	GO:0098581	detection of external biotic stimulus	2/724	24/18866	0.234567	0.631677	0.579822	NOD2/PGLYRP1	2
GO:1903429	GO:1903429	regulation of cell maturation	2/724	24/18866	0.234567	0.631677	0.579822	KIF14/TBX6	2
GO:0006112	GO:0006112	energy reserve metabolic process	5/724	86/18866	0.234612	0.631677	0.579822	GBE1/IGF1/PER2/PYGM/ENPP1	5
GO:0035023	GO:0035023	regulation of Rho protein signal transduction	5/724	86/18866	0.234612	0.631677	0.579822	ADGRG1/ARHGAP35/ARHGEF3/GPR174/EPS8L3	5
GO:0042509	GO:0042509	regulation of tyrosine phosphorylation of STAT protein	5/724	86/18866	0.234612	0.631677	0.579822	CAV1/IGF1/KIT/SOCS3/IL22RA2	5
GO:2000106	GO:2000106	regulation of leukocyte apoptotic process	5/724	86/18866	0.234612	0.631677	0.579822	ADAM8/HCAR2/NOD2/PRKCQ/RAG1	5
GO:0008593	GO:0008593	regulation of Notch signaling pathway	6/724	108/18866	0.234686	0.631677	0.579822	CHAC1/GATA2/KIT/NOD2/GAS2/EGF	6
GO:0002822	GO:0002822	regulation of adaptive immune response based on somatic recombination of immune receptors built from immunoglobulin superfamily domains	8/724	153/18866	0.234864	0.631677	0.579822	CD1E/CD226/CLC/HFE/IL1RL1/PRKCQ/TGFB1/TNFAIP3	8
GO:0045834	GO:0045834	positive regulation of lipid metabolic process	8/724	153/18866	0.234864	0.631677	0.579822	CD19/GPLD1/KIT/NOD2/PTK2B/RAB38/TGFB1/ADORA1	8
GO:0071774	GO:0071774	response to fibroblast growth factor	8/724	153/18866	0.234864	0.631677	0.579822	CRKL/CXCL8/EGR3/FGFR1/FGFR2/RUNX2/TDGF1/FAT4	8
GO:0001935	GO:0001935	endothelial cell proliferation	10/724	199/18866	0.235396	0.632764	0.580819	CAV1/EGR3/EPHA2/ERN1/FGFR1/GATA2/MIR101-1/PTPRM/CD34/VEGFA	10
GO:0006520	GO:0006520	cellular amino acid metabolic process	16/724	340/18866	0.235558	0.632853	0.580901	AARS2/AFMID/CTPS1/EEF1E1/GMPS/HDC/IL4I1/MTAP/NIT2/PYCR1/SARS2/SLC16A2/TPH1/AGMAT/AMT/FTCD	16
GO:0017145	GO:0017145	stem cell division	3/724	44/18866	0.237984	0.633171	0.581193	FGFR1/FGFR2/KIT	3
GO:0031670	GO:0031670	cellular response to nutrient	3/724	44/18866	0.237984	0.633171	0.581193	CDKN2B/GDAP1/PTN	3
GO:0032620	GO:0032620	interleukin-17 production	3/724	44/18866	0.237984	0.633171	0.581193	NOD2/PRKCQ/TGFB1	3
GO:0032965	GO:0032965	regulation of collagen biosynthetic process	3/724	44/18866	0.237984	0.633171	0.581193	MYB/TGFB1/EMILIN1	3
GO:0033173	GO:0033173	calcineurin-NFAT signaling cascade	3/724	44/18866	0.237984	0.633171	0.581193	IGF1/NFATC1/PPP3CC	3
GO:0035329	GO:0035329	hippo signaling	3/724	44/18866	0.237984	0.633171	0.581193	DLG5/SCHIP1/FAT4	3
GO:0042181	GO:0042181	ketone biosynthetic process	3/724	44/18866	0.237984	0.633171	0.581193	DGKQ/PPTC7/DKKL1	3
GO:0044060	GO:0044060	regulation of endocrine process	3/724	44/18866	0.237984	0.633171	0.581193	FGFR1/HCAR2/INHBA	3
GO:0044091	GO:0044091	membrane biogenesis	3/724	44/18866	0.237984	0.633171	0.581193	CAV1/ANK3/DMKN	3
GO:0045197	GO:0045197	establishment or maintenance of epithelial cell apical/basal polarity	3/724	44/18866	0.237984	0.633171	0.581193	CRB2/DLG5/LIN7A	3
GO:0045687	GO:0045687	positive regulation of glial cell differentiation	3/724	44/18866	0.237984	0.633171	0.581193	PTN/TGFB1/TENM4	3
GO:0060999	GO:0060999	positive regulation of dendritic spine development	3/724	44/18866	0.237984	0.633171	0.581193	DLG5/PPP1R9A/SHANK3	3
GO:0085029	GO:0085029	extracellular matrix assembly	3/724	44/18866	0.237984	0.633171	0.581193	QSOX1/TGFB1/EMILIN1	3
GO:0097178	GO:0097178	ruffle assembly	3/724	44/18866	0.237984	0.633171	0.581193	CAV1/EPS8L3/STAP1	3
GO:0120009	GO:0120009	intermembrane lipid transfer	3/724	44/18866	0.237984	0.633171	0.581193	PLEKHA3/PITPNM2/PLEKHA8P1	3
GO:1902667	GO:1902667	regulation of axon guidance	3/724	44/18866	0.237984	0.633171	0.581193	SEMA4D/SEMA6B/VEGFA	3
GO:1903053	GO:1903053	regulation of extracellular matrix organization	3/724	44/18866	0.237984	0.633171	0.581193	DPP4/TGFB1/EMILIN1	3
GO:1905521	GO:1905521	regulation of macrophage migration	3/724	44/18866	0.237984	0.633171	0.581193	PTK2B/EMILIN1/STAP1	3
GO:0003206	GO:0003206	cardiac chamber morphogenesis	7/724	131/18866	0.238441	0.633704	0.581682	CITED2/FGFR2/PKP2/PPP1R13L/TGFB1/TGFBR3/TNNC1	7
GO:0019218	GO:0019218	regulation of steroid metabolic process	7/724	131/18866	0.238441	0.633704	0.581682	DDX20/DGKQ/KIT/KPNB1/SNAI1/DKKL1/ELOVL6	7
GO:0035794	GO:0035794	positive regulation of mitochondrial membrane permeability	4/724	65/18866	0.238866	0.634151	0.582093	BAD/BAK1/MOAP1/PPP3CC	4
GO:0048645	GO:0048645	animal organ formation	4/724	65/18866	0.238866	0.634151	0.582093	CITED2/FGFR1/FGFR2/GLI3	4
GO:0017038	GO:0017038	protein import	10/724	200/18866	0.24	0.636818	0.584541	ANGPT1/CDKN1A/GRPEL2/IPO13/KPNB1/POM121/TGFB1/TIMM23/GLI3/PKIA	10
GO:0002706	GO:0002706	regulation of lymphocyte mediated immunity	8/724	154/18866	0.240139	0.636845	0.584565	CD1E/CD226/CLC/CLNK/HFE/PIK3R6/TGFB1/CD160	8
GO:0034976	GO:0034976	response to endoplasmic reticulum stress	14/724	294/18866	0.240853	0.638395	0.585988	AQP11/BAK1/CAV1/CHAC1/CXCL8/DNAJB11/EIF2B5/ERN1/FKBP14/PPP2R5B/SDF2L1/TMEM117/ATP2A1/ERP27	14
GO:2000278	GO:2000278	regulation of DNA biosynthetic process	6/724	109/18866	0.241021	0.6385	0.586085	CDKN1A/DSCC1/PARM1/PRKCQ/PTK2B/MAPK15	6
GO:0097581	GO:0097581	lamellipodium organization	5/724	87/18866	0.241763	0.640122	0.587574	DMTN/EPHA2/KIT/NCKAP1/WHAMM	5
GO:0042692	GO:0042692	muscle cell differentiation	18/724	390/18866	0.243068	0.643006	0.590221	EDN1/FGFR2/IGF1/KIT/MAPK11/NFATC1/NRAP/SMYD3/TGFB1/TMEM119/TMOD2/TRIM72/UCHL1/ZEB1/ACTA1/BDNF/VEGFA/CDH15	18
GO:0030509	GO:0030509	BMP signaling pathway	8/724	155/18866	0.245453	0.643006	0.590221	CHRD/CRB2/HFE/RUNX2/SKIL/TGFB1/TGFBR3/BMPR1B	8
GO:1904950	GO:1904950	negative regulation of establishment of protein localization	8/724	155/18866	0.245453	0.643006	0.590221	ANGPT1/CDK5/DMTN/LMAN1/MIDN/FFAR4/PKIA/SYTL4	8
GO:0006941	GO:0006941	striated muscle contraction	9/724	178/18866	0.245459	0.643006	0.590221	AKAP9/CAV1/KCNH2/PKP2/PPP1R13L/TNNC1/ADORA1/ATP2A1/NOS1AP	9
GO:0051260	GO:0051260	protein homooligomerization	9/724	178/18866	0.245459	0.643006	0.590221	AQP11/DISP1/MPP2/PNPT1/POLQ/STEAP4/TRIM72/KCNS3/RYR3	9
GO:0007568	GO:0007568	aging	15/724	319/18866	0.245559	0.643006	0.590221	BAK1/CDKN1A/CDKN2B/CRYAB/EDN1/EEF1E1/EIF2B5/FOXO3/GJB6/KCNMB1/LONP1/NTRK1/PNPT1/PPP1R9A/TRPC6	15
GO:0007585	GO:0007585	respiratory gaseous exchange by respiratory system	4/724	66/18866	0.247248	0.643006	0.590221	EDN1/FTO/TNNC1/ADORA1	4
GO:0034394	GO:0034394	protein localization to cell surface	4/724	66/18866	0.247248	0.643006	0.590221	ANGPT1/HFE/BDNF/EGF	4
GO:0046626	GO:0046626	regulation of insulin receptor signaling pathway	4/724	66/18866	0.247248	0.643006	0.590221	PRKCQ/SOCS3/TRIM72/ENPP1	4
GO:0048207	GO:0048207	vesicle targeting, rough ER to cis-Golgi	4/724	66/18866	0.247248	0.643006	0.590221	F5/LMAN1/CNIH3/MAPK15	4
GO:0048208	GO:0048208	COPII vesicle coating	4/724	66/18866	0.247248	0.643006	0.590221	F5/LMAN1/CNIH3/MAPK15	4
GO:1901016	GO:1901016	regulation of potassium ion transmembrane transporter activity	4/724	66/18866	0.247248	0.643006	0.590221	AKAP9/CAV1/ANK3/NOS1AP	4
GO:1902108	GO:1902108	regulation of mitochondrial membrane permeability involved in apoptotic process	4/724	66/18866	0.247248	0.643006	0.590221	BAD/BAK1/MOAP1/PPP3CC	4
GO:1905818	GO:1905818	regulation of chromosome separation	4/724	66/18866	0.247248	0.643006	0.590221	CDC16/NDC80/TRIP13/MAPK15	4
GO:0006418	GO:0006418	tRNA aminoacylation for protein translation	3/724	45/18866	0.248328	0.643006	0.590221	AARS2/EEF1E1/SARS2	3
GO:0010677	GO:0010677	negative regulation of cellular carbohydrate metabolic process	3/724	45/18866	0.248328	0.643006	0.590221	DDIT4/MIDN/ENPP1	3
GO:0032365	GO:0032365	intracellular lipid transport	3/724	45/18866	0.248328	0.643006	0.590221	PCSK9/SLC25A20/PLEKHA8P1	3
GO:0032924	GO:0032924	activin receptor signaling pathway	3/724	45/18866	0.248328	0.643006	0.590221	CITED2/INHBA/TDGF1	3
GO:0034122	GO:0034122	negative regulation of toll-like receptor signaling pathway	3/724	45/18866	0.248328	0.643006	0.590221	MFHAS1/TICAM1/TNFAIP3	3
GO:0035315	GO:0035315	hair cell differentiation	3/724	45/18866	0.248328	0.643006	0.590221	FGFR1/TPRN/MCOLN3	3
GO:0046189	GO:0046189	phenol-containing compound biosynthetic process	3/724	45/18866	0.248328	0.643006	0.590221	HDC/TPH1/OCA2	3
GO:0051204	GO:0051204	protein insertion into mitochondrial membrane	3/724	45/18866	0.248328	0.643006	0.590221	BAD/MOAP1/PPP3CC	3
GO:0060412	GO:0060412	ventricular septum morphogenesis	3/724	45/18866	0.248328	0.643006	0.590221	CITED2/FGFR2/TGFBR3	3
GO:0070266	GO:0070266	necroptotic process	3/724	45/18866	0.248328	0.643006	0.590221	CAV1/MIR101-1/TICAM1	3
GO:0070316	GO:0070316	regulation of G0 to G1 transition	3/724	45/18866	0.248328	0.643006	0.590221	MGA/PPP2R5B/RBBP7	3
GO:1901028	GO:1901028	regulation of mitochondrial outer membrane permeabilization involved in apoptotic signaling pathway	3/724	45/18866	0.248328	0.643006	0.590221	BAD/BAK1/PPP3CC	3
GO:1904646	GO:1904646	cellular response to amyloid-beta	3/724	45/18866	0.248328	0.643006	0.590221	CDK5/FOXO3/IGF1	3
GO:2001222	GO:2001222	regulation of neuron migration	3/724	45/18866	0.248328	0.643006	0.590221	ADGRG1/PLAA/SCRT2	3
GO:0000729	GO:0000729	DNA double-strand break processing	2/724	25/18866	0.248945	0.643006	0.590221	RAD52/SETMAR	2
GO:0010738	GO:0010738	regulation of protein kinase A signaling	2/724	25/18866	0.248945	0.643006	0.590221	AKAP1/AKAP12	2
GO:0010842	GO:0010842	retina layer formation	2/724	25/18866	0.248945	0.643006	0.590221	PTPRM/TFAP2A	2
GO:0015740	GO:0015740	C4-dicarboxylate transport	2/724	25/18866	0.248945	0.643006	0.590221	SLC25A22/SLC1A1	2
GO:0032528	GO:0032528	microvillus organization	2/724	25/18866	0.248945	0.643006	0.590221	GLDN/RAPGEF6	2
GO:0042537	GO:0042537	benzene-containing compound metabolic process	2/724	25/18866	0.248945	0.643006	0.590221	ACSM1/AFMID	2
GO:0045109	GO:0045109	intermediate filament organization	2/724	25/18866	0.248945	0.643006	0.590221	PKP2/GFAP	2
GO:0050927	GO:0050927	positive regulation of positive chemotaxis	2/724	25/18866	0.248945	0.643006	0.590221	CXCL8/VEGFA	2
GO:0060669	GO:0060669	embryonic placenta morphogenesis	2/724	25/18866	0.248945	0.643006	0.590221	FGFR2/SOCS3	2
GO:0061050	GO:0061050	regulation of cell growth involved in cardiac muscle cell development	2/724	25/18866	0.248945	0.643006	0.590221	EDN1/IGF1	2
GO:0061217	GO:0061217	regulation of mesonephros development	2/724	25/18866	0.248945	0.643006	0.590221	HNF1B/VEGFA	2
GO:0062149	GO:0062149	detection of stimulus involved in sensory perception of pain	2/724	25/18866	0.248945	0.643006	0.590221	NTRK1/ADORA1	2
GO:0070920	GO:0070920	regulation of production of small RNA involved in gene silencing by RNA	2/724	25/18866	0.248945	0.643006	0.590221	ESR1/TGFB1	2
GO:0097205	GO:0097205	renal filtration	2/724	25/18866	0.248945	0.643006	0.590221	ADORA1/CD34	2
GO:1904376	GO:1904376	negative regulation of protein localization to cell periphery	2/724	25/18866	0.248945	0.643006	0.590221	TGFB1/LYPD1	2
GO:2000311	GO:2000311	regulation of AMPA receptor activity	2/724	25/18866	0.248945	0.643006	0.590221	CNIH3/SHANK3	2
GO:2000679	GO:2000679	positive regulation of transcription regulatory region DNA binding	2/724	25/18866	0.248945	0.643006	0.590221	IGF1/TGFB1	2
GO:2001026	GO:2001026	regulation of endothelial cell chemotaxis	2/724	25/18866	0.248945	0.643006	0.590221	FGFR1/VEGFA	2
GO:0002028	GO:0002028	regulation of sodium ion transport	5/724	88/18866	0.248973	0.643006	0.590221	PCSK9/PER1/PKP2/WNK2/ANK3	5
GO:0009746	GO:0009746	response to hexose	10/724	202/18866	0.249304	0.643524	0.590696	BAD/COL6A2/EIF2B5/ERN1/FOXO3/GJB6/GPLD1/PTK2B/UNC13B/HNF1B	10
GO:0000187	GO:0000187	activation of MAPK activity	8/724	156/18866	0.250806	0.646726	0.593635	CRKL/ERN1/IGF1/KIT/MAPK11/NOD2/TDGF1/EGF	8
GO:0030902	GO:0030902	hindbrain development	8/724	156/18866	0.250806	0.646726	0.593635	CDK5/CRKL/GATA2/KIF14/NFIB/PTN/HNF1B/EGF	8
GO:0044839	GO:0044839	cell cycle G2/M phase transition	13/724	273/18866	0.251329	0.647737	0.594563	ABCB1/AKAP9/CDKN1A/CDKN2B/CEP192/DTL/GTSE1/HAUS5/KIF14/TPD52L1/WEE1/PBX1/PKIA	13
GO:0035305	GO:0035305	negative regulation of dephosphorylation	6/724	111/18866	0.253842	0.653531	0.599881	CEP192/MFHAS1/PTN/SEMA4D/SH2D4A/CCDC8	6
GO:0051149	GO:0051149	positive regulation of muscle cell differentiation	6/724	111/18866	0.253842	0.653531	0.599881	EDN1/IGF1/KIT/MAPK11/TGFB1/CDH15	6
GO:0030239	GO:0030239	myofibril assembly	4/724	67/18866	0.255694	0.655563	0.601747	EDN1/NRAP/TMOD2/ACTA1	4
GO:0033866	GO:0033866	nucleoside bisphosphate biosynthetic process	4/724	67/18866	0.255694	0.655563	0.601747	ACOT7/ELOVL7/HACD1/ELOVL6	4
GO:0034030	GO:0034030	ribonucleoside bisphosphate biosynthetic process	4/724	67/18866	0.255694	0.655563	0.601747	ACOT7/ELOVL7/HACD1/ELOVL6	4
GO:0034033	GO:0034033	purine nucleoside bisphosphate biosynthetic process	4/724	67/18866	0.255694	0.655563	0.601747	ACOT7/ELOVL7/HACD1/ELOVL6	4
GO:0045670	GO:0045670	regulation of osteoclast differentiation	4/724	67/18866	0.255694	0.655563	0.601747	KLF10/LRRC17/LTF/MITF	4
GO:0050918	GO:0050918	positive chemotaxis	4/724	67/18866	0.255694	0.655563	0.601747	ANGPT1/CXCL8/ROBO3/VEGFA	4
GO:1900015	GO:1900015	regulation of cytokine production involved in inflammatory response	4/724	67/18866	0.255694	0.655563	0.601747	MEFV/NOD2/PER1/TICAM1	4
GO:1905710	GO:1905710	positive regulation of membrane permeability	4/724	67/18866	0.255694	0.655563	0.601747	BAD/BAK1/MOAP1/PPP3CC	4
GO:0009855	GO:0009855	determination of bilateral symmetry	7/724	134/18866	0.255866	0.655594	0.601775	CITED2/DAAM2/DISP1/DPCD/DYNC2H1/TBX6/TDGF1	7
GO:0007260	GO:0007260	tyrosine phosphorylation of STAT protein	5/724	89/18866	0.256236	0.655594	0.601775	CAV1/IGF1/KIT/SOCS3/IL22RA2	5
GO:0055006	GO:0055006	cardiac cell development	5/724	89/18866	0.256236	0.655594	0.601775	EDN1/IGF1/NRAP/TGFBR3/VEGFA	5
GO:1901019	GO:1901019	regulation of calcium ion transmembrane transporter activity	5/724	89/18866	0.256236	0.655594	0.601775	CDK5/OPRL1/ATP2A1/NOS1AP/GEM	5
GO:0010761	GO:0010761	fibroblast migration	3/724	46/18866	0.258738	0.659277	0.605156	AKAP12/DMTN/TGFB1	3
GO:0014014	GO:0014014	negative regulation of gliogenesis	3/724	46/18866	0.258738	0.659277	0.605156	DAAM2/PTN/STAP1	3
GO:0031641	GO:0031641	regulation of myelination	3/724	46/18866	0.258738	0.659277	0.605156	KIF14/PTN/TENM4	3
GO:0045023	GO:0045023	G0 to G1 transition	3/724	46/18866	0.258738	0.659277	0.605156	MGA/PPP2R5B/RBBP7	3
GO:0061028	GO:0061028	establishment of endothelial barrier	3/724	46/18866	0.258738	0.659277	0.605156	MARVELD2/S1PR3/VEGFA	3
GO:0010927	GO:0010927	cellular component assembly involved in morphogenesis	6/724	112/18866	0.260322	0.659277	0.605156	EDN1/NRAP/PMP22/TMOD2/ACTA1/TENM4	6
GO:0046822	GO:0046822	regulation of nucleocytoplasmic transport	6/724	112/18866	0.260322	0.659277	0.605156	ANGPT1/CDK5/GTSE1/TGFB1/GLI3/PKIA	6
GO:0060402	GO:0060402	calcium ion transport into cytosol	8/724	158/18866	0.261621	0.659277	0.605156	BAK1/CAV1/CD19/GRIN2D/PTK2B/SLC8A2/MCOLN3/RYR3	8
GO:0003158	GO:0003158	endothelium development	7/724	135/18866	0.261757	0.659277	0.605156	EDF1/MARVELD2/PTN/S1PR3/ZEB1/CD34/VEGFA	7
GO:0009799	GO:0009799	specification of symmetry	7/724	135/18866	0.261757	0.659277	0.605156	CITED2/DAAM2/DISP1/DPCD/DYNC2H1/TBX6/TDGF1	7
GO:0032368	GO:0032368	regulation of lipid transport	7/724	135/18866	0.261757	0.659277	0.605156	CAV1/DBI/EDN1/MYB/OSBPL6/PCSK9/EGF	7
GO:0000188	GO:0000188	inactivation of MAPK activity	2/724	26/18866	0.263348	0.659277	0.605156	CAV1/MBIP	2
GO:0000272	GO:0000272	polysaccharide catabolic process	2/724	26/18866	0.263348	0.659277	0.605156	CHIT1/PYGM	2
GO:0001783	GO:0001783	B cell apoptotic process	2/724	26/18866	0.263348	0.659277	0.605156	BAK1/CRKL	2
GO:0002507	GO:0002507	tolerance induction	2/724	26/18866	0.263348	0.659277	0.605156	CLC/TNFAIP3	2
GO:0003081	GO:0003081	regulation of systemic arterial blood pressure by renin-angiotensin	2/724	26/18866	0.263348	0.659277	0.605156	CTSG/ENPEP	2
GO:0021884	GO:0021884	forebrain neuron development	2/724	26/18866	0.263348	0.659277	0.605156	FGFR2/DCLK2	2
GO:0031664	GO:0031664	regulation of lipopolysaccharide-mediated signaling pathway	2/724	26/18866	0.263348	0.659277	0.605156	LTF/TNFAIP3	2
GO:0032967	GO:0032967	positive regulation of collagen biosynthetic process	2/724	26/18866	0.263348	0.659277	0.605156	MYB/TGFB1	2
GO:0035640	GO:0035640	exploration behavior	2/724	26/18866	0.263348	0.659277	0.605156	DLG4/DPP4	2
GO:0036315	GO:0036315	cellular response to sterol	2/724	26/18866	0.263348	0.659277	0.605156	GPLD1/INHBA	2
GO:0042104	GO:0042104	positive regulation of activated T cell proliferation	2/724	26/18866	0.263348	0.659277	0.605156	IGF1/TNFSF9	2
GO:0042403	GO:0042403	thyroid hormone metabolic process	2/724	26/18866	0.263348	0.659277	0.605156	GCNT4/SLC16A2	2
GO:0043501	GO:0043501	skeletal muscle adaptation	2/724	26/18866	0.263348	0.659277	0.605156	TNNC1/ACTA1	2
GO:0043567	GO:0043567	regulation of insulin-like growth factor receptor signaling pathway	2/724	26/18866	0.263348	0.659277	0.605156	IGF1/TRIM72	2
GO:0043951	GO:0043951	negative regulation of cAMP-mediated signaling	2/724	26/18866	0.263348	0.659277	0.605156	OPRL1/RNF157	2
GO:0044068	GO:0044068	modulation by symbiont of host cellular process	2/724	26/18866	0.263348	0.659277	0.605156	BAD/KPNB1	2
GO:0048843	GO:0048843	negative regulation of axon extension involved in axon guidance	2/724	26/18866	0.263348	0.659277	0.605156	SEMA4D/SEMA6B	2
GO:0050926	GO:0050926	regulation of positive chemotaxis	2/724	26/18866	0.263348	0.659277	0.605156	CXCL8/VEGFA	2
GO:0060384	GO:0060384	innervation	2/724	26/18866	0.263348	0.659277	0.605156	NTRK1/UNC13B	2
GO:0060740	GO:0060740	prostate gland epithelium morphogenesis	2/724	26/18866	0.263348	0.659277	0.605156	ESR1/FGFR2	2
GO:0072012	GO:0072012	glomerulus vasculature development	2/724	26/18866	0.263348	0.659277	0.605156	ANGPT1/CD34	2
GO:0072202	GO:0072202	cell differentiation involved in metanephros development	2/724	26/18866	0.263348	0.659277	0.605156	CD34/FAT4	2
GO:0097066	GO:0097066	response to thyroid hormone	2/724	26/18866	0.263348	0.659277	0.605156	GATA1/KIT	2
GO:0140058	GO:0140058	neuron projection arborization	2/724	26/18866	0.263348	0.659277	0.605156	DLG4/PTN	2
GO:1900739	GO:1900739	regulation of protein insertion into mitochondrial membrane involved in apoptotic signaling pathway	2/724	26/18866	0.263348	0.659277	0.605156	BAD/PPP3CC	2
GO:1900740	GO:1900740	positive regulation of protein insertion into mitochondrial membrane involved in apoptotic signaling pathway	2/724	26/18866	0.263348	0.659277	0.605156	BAD/PPP3CC	2
GO:1901018	GO:1901018	positive regulation of potassium ion transmembrane transporter activity	2/724	26/18866	0.263348	0.659277	0.605156	AKAP9/NOS1AP	2
GO:1902914	GO:1902914	regulation of protein polyubiquitination	2/724	26/18866	0.263348	0.659277	0.605156	NOD2/PLAA	2
GO:1903020	GO:1903020	positive regulation of glycoprotein metabolic process	2/724	26/18866	0.263348	0.659277	0.605156	IGF1/RAMP1	2
GO:1904353	GO:1904353	regulation of telomere capping	2/724	26/18866	0.263348	0.659277	0.605156	PRKCQ/MAPK15	2
GO:0035966	GO:0035966	response to topologically incorrect protein	10/724	205/18866	0.263488	0.659277	0.605156	BAK1/CHAC1/CXCL8/DNAJB11/ERN1/FKBP14/HSPB7/PPP2R5B/SDF2L1/ERP27	10
GO:0032465	GO:0032465	regulation of cytokinesis	5/724	90/18866	0.263551	0.659277	0.605156	AHCTF1/E2F7/KIF14/MAP10/AURKC	5
GO:0070542	GO:0070542	response to fatty acid	5/724	90/18866	0.263551	0.659277	0.605156	BAD/EDN1/FOXO3/TGFBR3/PTGER2	5
GO:0050766	GO:0050766	positive regulation of phagocytosis	4/724	68/18866	0.264196	0.660222	0.606024	GATA2/RAB27A/STAP1/C4A	4
GO:0051148	GO:0051148	negative regulation of muscle cell differentiation	4/724	68/18866	0.264196	0.660222	0.606024	NFATC1/TMEM119/TRIM72/BDNF	4
GO:0090288	GO:0090288	negative regulation of cellular response to growth factor stimulus	9/724	182/18866	0.265576	0.663336	0.608882	BAMBI/CAV1/CHRD/SKIL/TGFB1/TGFBR3/EID2/EMILIN1/HTRA4	9
GO:0001676	GO:0001676	long-chain fatty acid metabolic process	6/724	113/18866	0.266845	0.665831	0.611172	ACOT7/ACOT8/PTGS1/FAAH2/HPGD/ELOVL6	6
GO:0032963	GO:0032963	collagen metabolic process	6/724	113/18866	0.266845	0.665831	0.611172	ADAMTS3/MRC2/MYB/TGFB1/EMILIN1/MMP16	6
GO:0055067	GO:0055067	monovalent inorganic cation homeostasis	8/724	159/18866	0.267081	0.666084	0.611404	AQP11/EDN1/KCNH2/RAB38/SLC12A1/SPX/ADORA1/NPPB	8
GO:0034504	GO:0034504	protein localization to nucleus	13/724	277/18866	0.267622	0.667095	0.612332	ANGPT1/CDK5/CDKN1A/GTSE1/IPO13/KPNB1/MFHAS1/POM121/TGFB1/CARD10/DCLK2/GLI3/PKIA	13
GO:0035637	GO:0035637	multicellular organismal signaling	10/724	206/18866	0.268273	0.668005	0.613167	AKAP9/CAV1/KCNH2/NRCAM/OTOA/PKP2/SLC8A2/ANK3/ATP2A1/RYR3	10
GO:0071383	GO:0071383	cellular response to steroid hormone stimulus	10/724	206/18866	0.268273	0.668005	0.613167	DDIT4/DEFA3/EDN1/ESR1/FOXO3/PADI2/PER1/RNF14/SMYD3/FBXO32	10
GO:0006383	GO:0006383	transcription by RNA polymerase III	3/724	47/18866	0.269204	0.668005	0.613167	POLR3G/SNAPC1/TENM1	3
GO:0008542	GO:0008542	visual learning	3/724	47/18866	0.269204	0.668005	0.613167	CDK5/KIT/RAG1	3
GO:0014003	GO:0014003	oligodendrocyte development	3/724	47/18866	0.269204	0.668005	0.613167	B4GALT5/EIF2B5/TENM4	3
GO:0030574	GO:0030574	collagen catabolic process	3/724	47/18866	0.269204	0.668005	0.613167	ADAMTS3/MRC2/MMP16	3
GO:0048806	GO:0048806	genitalia development	3/724	47/18866	0.269204	0.668005	0.613167	BAK1/ESR1/TCF7	3
GO:0050919	GO:0050919	negative chemotaxis	3/724	47/18866	0.269204	0.668005	0.613167	DPP4/SEMA4D/SEMA6B	3
GO:0060986	GO:0060986	endocrine hormone secretion	3/724	47/18866	0.269204	0.668005	0.613167	FGFR1/HCAR2/INHBA	3
GO:0046474	GO:0046474	glycerophospholipid biosynthetic process	11/724	230/18866	0.270059	0.669789	0.614805	ACHE/AGPAT4/DGKQ/PIK3R6/PIP5K1B/PLEKHA1/PLEKHA3/RAB38/BMX/ETNK2/PITPNM2	11
GO:0006986	GO:0006986	response to unfolded protein	9/724	183/18866	0.270684	0.669886	0.614894	BAK1/CHAC1/CXCL8/DNAJB11/ERN1/FKBP14/HSPB7/PPP2R5B/ERP27	9
GO:0030177	GO:0030177	positive regulation of Wnt signaling pathway	9/724	183/18866	0.270684	0.669886	0.614894	BAMBI/CAV1/DAAM2/FGFR2/SCEL/TGFB1/TNFAIP3/WNK2/EGF	9
GO:0015914	GO:0015914	phospholipid transport	5/724	91/18866	0.270912	0.669886	0.614894	ABCB1/DBI/PLEKHA3/PITPNM2/PLEKHA8P1	5
GO:0030901	GO:0030901	midbrain development	5/724	91/18866	0.270912	0.669886	0.614894	DLG5/FGFR1/FGFR2/PADI2/SYNGR3	5
GO:0060333	GO:0060333	interferon-gamma-mediated signaling pathway	5/724	91/18866	0.270912	0.669886	0.614894	HCK/HLA-DQB2/SOCS3/NCAM1/HLA-DQA1	5
GO:0097306	GO:0097306	cellular response to alcohol	5/724	91/18866	0.270912	0.669886	0.614894	FOXO3/GPLD1/INHBA/KCNMB1/PTGER2	5
GO:0000086	GO:0000086	G2/M transition of mitotic cell cycle	12/724	254/18866	0.271164	0.670174	0.615158	ABCB1/AKAP9/CDKN1A/CDKN2B/CEP192/DTL/HAUS5/KIF14/TPD52L1/WEE1/PBX1/PKIA	12
GO:0045165	GO:0045165	cell fate commitment	13/724	278/18866	0.271751	0.671288	0.616181	FGFR1/FGFR2/GATA1/GATA2/LMO4/MGA/MITF/RUNX2/TBX19/TBX6/GLI3/HNF1B/TENM4	13
[truncated: 2,939 more rows]
